# Supplementary material for: The winding roads to adulthood: A twin study
Source: PubMed Central journal article supplement (PMC10242946; doi:10.1002/jcv2.12053), 2021-12-11

# Supporting information

## The winding roads to adulthood: a twin study

Kaili Rimfeld, Margherita Malancini, Amy E. Packer, Agnieszka Gidziela, Andrea Allegrini, Ziada Ayorech, Emily Smith-Woolley, Andrew McMillan, Rachel Ogden, Philip S. Dale, Thalia C. Eley and Robert Plomin

### Contents

|                                                                                                                                                                                                                                                                                                                                                                                                                                                                                     |    |
|-------------------------------------------------------------------------------------------------------------------------------------------------------------------------------------------------------------------------------------------------------------------------------------------------------------------------------------------------------------------------------------------------------------------------------------------------------------------------------------|----|
| Appendix S1 .....                                                                                                                                                                                                                                                                                                                                                                                                                                                                   | 3  |
| Quality control .....                                                                                                                                                                                                                                                                                                                                                                                                                                                               | 3  |
| Supplementary Tables .....                                                                                                                                                                                                                                                                                                                                                                                                                                                          | 4  |
| Table S1. Descriptive statistics for psychological traits, for the whole and males and females separately.....                                                                                                                                                                                                                                                                                                                                                                      | 4  |
| Table S2. Descriptive statistics for psychological traits, for five sex and zygosity groups.....                                                                                                                                                                                                                                                                                                                                                                                    | 8  |
| Table S3. Summary of measured variables used .....                                                                                                                                                                                                                                                                                                                                                                                                                                  | 11 |
| Table S4. Descriptive statistics for psychological traits, for the whole and males and females separately (repeated with the twin that was not randomly selected from each pair in the main analyses). .....                                                                                                                                                                                                                                                                        | 21 |
| Table S5. Descriptive statistics for psychological traits, for five sex and zygosity groups (repeated with the twin that was not randomly selected from each pair in the main analyses). .....                                                                                                                                                                                                                                                                                      | 25 |
| Table S6. Phenotypic correlations between psychological traits and composite scores of adverse physical and adverse mental health, wellbeing and educational attainment, for the whole sample (a) and then separately for males (b) and females (c) (95% confidence intervals are in parentheses). .....                                                                                                                                                                            | 28 |
| Table S7. Summary of multiple regression analyses: variance explained in composite scores of adverse physical and adverse mental health, wellbeing and educational attainment psychological traits, for the whole sample (a) and then separately for males (b) and females (c) (95% confidence intervals are in parentheses).....                                                                                                                                                   | 38 |
| Table S8. Twin intraclass correlations and Falconer ACE estimates, and model fitting results for univariate analyses of additive genetic (A), shared environmental (C), and non-shared environmental (E) components of variance for variables for psychological traits and functional outcomes (95% confidence intervals are in parentheses). (a) for the whole sample; (b) males only; (c) females only; (d) MZ and DZ same sex twin pairs (opposite sex DZ twins excluded). ..... | 49 |
| Table S9. Univariate twin analyses presenting additive genetic (A), shared environmental (C), and non-shared environmental (E) components of variance EA traits and functional outcomes (95% confidence intervals are in parentheses). .....                                                                                                                                                                                                                                        | 60 |
| Table S10. Model-fit statistics for the univariate twin analyses.....                                                                                                                                                                                                                                                                                                                                                                                                               | 64 |
| Table S11. Model-fit statistics for the sex limitation twin analyses. ....                                                                                                                                                                                                                                                                                                                                                                                                          | 75 |
| Table S12. Model fitting results for bivariate analyses of the correlation between psychological traits and functional outcomes explained by genetic (A), shared environmental (C), and non-shared environmental (E) factors (95% confidence intervals are in parentheses).....                                                                                                                                                                                                     | 83 |
| Table S13. Model fitting results for bivariate analyses of genetic correlation ( $r_A$ ), shared environmental correlation ( $r_C$ ), and non-shared environmental correlation ( $r_E$ ) for psychological traits and functional outcomes (95% confidence intervals are in parentheses).....                                                                                                                                                                                        | 97 |

|                                                                                                                                                                                                                                                                                                                                                                                   |     |
|-----------------------------------------------------------------------------------------------------------------------------------------------------------------------------------------------------------------------------------------------------------------------------------------------------------------------------------------------------------------------------------|-----|
| Table S14. Univariate GREML estimates.....                                                                                                                                                                                                                                                                                                                                        | 112 |
| Table S15. Bivariate GREML results. ....                                                                                                                                                                                                                                                                                                                                          | 115 |
| Supplementary Figures .....                                                                                                                                                                                                                                                                                                                                                       | 118 |
| Figure S1. The Bivariate Cholesky Decomposition.....                                                                                                                                                                                                                                                                                                                              | 118 |
| <b>Figure S2.</b> Phenotypic correlations between key outcomes and emerging adulthood variables (indicated by the total length of the bar); bivariate genetic estimates for additive genetic (A), shared environmental (C) and non-shared environmental (E) contributions to these correlations for males (a), females (b) and when excluding DZ opposite sex twin pairs (c)..... | 119 |
| Figure S3. Twin correlations for psychological and behavioural traits and key functional outcomes for the whole sample.....                                                                                                                                                                                                                                                       | 122 |
| Figure S4. Univariate analyses of additive genetic (A), shared environmental (C), and non-shared environmental (E) components of variance for variables for psychological traits and functional outcomes for when calculated for males and females separately (a) and for the whole sample when opposite sex DZ twin pairs were excluded (b). ....                                | 123 |
| Figure S5. Genetic correlations between psychological and behavioural traits and key functional outcomes for the males (a), females (b) and for the whole sample when opposite sex DZ twin were excluded (c) .....                                                                                                                                                                | 125 |
| Figure S6. Shared environmental correlations between psychological and behavioural traits and key functional outcomes (a) for the whole sample; (b) MZ and DZ same sex; (c) males only; (d) females only.....                                                                                                                                                                     | 126 |
| Figure S7. Non-shared environmental correlations between psychological and behavioural traits and key functional outcomes (a) for the whole sample; (b) MZ and DZ same sex twin pairs only; (c) males only; (d) females only .....                                                                                                                                                | 127 |
| Figure S8. Univariate GREML analyses; SNP heritabilities for psychological traits and functional outcomes for the whole sample (standard errors represented in error bars; reml-no-constrain option indicated by the point estimates below 0). ....                                                                                                                               | 128 |
| Figure S9. Univariate twin analyses of additive genetic (A), shared environmental (C), and non-shared environmental (E) components of variance for variables for psychological traits and functional outcomes for the whole sample for untransformed data and when using Van der Waerden transformation.....                                                                      | 129 |
| Figure S10. Univariate GREML analyses; SNP heritabilities for psychological traits and functional outcomes for the whole sample for untransformed data and when using Van der Waerden transformation (standard errors represented in error bars). ....                                                                                                                            | 129 |

## Appendix S1

### Quality control

Two methods of identifying likely “clickers” are used in the TEDS-21 twin questionnaires:

1. *Quality control item error with uniform responding.* For a measure containing a quality control (QC) item, if a twin’s response in the QC item was incorrect *and* the twin gave the same response in at least 3 of the adjacent 4 items within the measure, then the twin was labelled as a clicker and the theme was excluded. This definition could be applied in paper questionnaires as well as in web/app questionnaires. The rule had to be modified in some measures depending on the nature of the questions, etc.
3. *Quality control item error with rapid responding.* For a measure containing a QC item, if a twin’s response in the QC item was incorrect *and* the mean time taken per item across the entire theme was in the lowest 20%-ile of the distribution, then the twin was labelled as a clicker and the theme was excluded. This definition could only be applied for twins using web/app, where times could be measured, not for twins using paper. This rule was relaxed in only one theme where different conditions seemed to apply.

Hence, twins responding on paper could be excluded by the first criterion but not the second.

The rules above could not be applied uniformly across all themes in the two questionnaires. Some themes had no measures with QC items (hence no rule could be applied), some themes had one measure with a QC item, and some themes had more than one measure with a QC item.

The % excluded varies according to exclusion method, measure and theme. Below is an approximation of the % of twins excluded:

- Uniform responding (with QC item error): typically around 1% of twins were excluded per measure, but this varied from .01% to 6% in different measures.
- Rapid responding (with QC item error): typically around 1% of twins were excluded per measure, but this varied from .5% to 3%.
- Overall per theme: typically around 1% of twins were excluded per theme, but this varied from .3% to 5.3% (and of course 0% in themes without any measure containing a QC item).
- Overall exclusion for the entire questionnaire (questionnaire excluded if two or more themes excluded): 1.7% of twins in phase 1, .5% of twins in phase 2.
- Overall % of clickers (twin deemed to be a clicker and hence excluded from at least one theme): 5.5% of twins in phase 1, 4.4% of twins in phase 2.

As well as the varying number of measures with QC items, other factors caused variations in the percentages. For example, QC item errors were more likely in measures that were long, repetitive and perhaps “boring” to twins. The use of QC items was less well planned in phase 1, with the result that they were unevenly spread through the questionnaire and, in certain measures, the % of QC errors was higher than perhaps it should have been.

**Supplementary Tables**

**Table S1.** Descriptive statistics for psychological traits, for the whole and males and females separately.

| Trait (possible range)                    | All      |      |       |          |           | Males    |      |       |          |           | Females  |      |       |          |           | ANOVA <sup>a</sup> |          |                       |
|-------------------------------------------|----------|------|-------|----------|-----------|----------|------|-------|----------|-----------|----------|------|-------|----------|-----------|--------------------|----------|-----------------------|
|                                           | <i>N</i> | Min  | Max   | <i>M</i> | <i>SD</i> | <i>n</i> | Min  | Max   | <i>M</i> | <i>SD</i> | <i>n</i> | Min  | Max   | <i>M</i> | <i>SD</i> | Sex                | <i>p</i> | <i>R</i> <sup>2</sup> |
| Daily hassles (0-28)                      | 4324     | .00  | 28.00 | 12.54    | 4.63      | 1609     | .00  | 28.00 | 11.96    | 4.58      | 2715     | .00  | 28.00 | 12.88    | 4.62      | 4.40               | <.001    | .01                   |
| CHAOS (0-12)                              | 4875     | .00  | 12.00 | 3.81     | 2.22      | 1860     | .00  | 12.00 | 3.73     | 2.05      | 3015     | .00  | 12.00 | 3.86     | 2.32      | 4.05               | .044     | .00                   |
| Childhood experiences (0-32)              | 4321     | .00  | 32.00 | 5.31     | 4.59      | 1607     | .00  | 32.00 | 5.27     | 4.11      | 2714     | .00  | 32.00 | 5.33     | 4.85      | .19                | .665     | .00                   |
| Poor sleep quality (0-24)                 | 4250     | .00  | 24.00 | 4.85     | 3.84      | 1578     | .00  | 22.00 | 4.09     | 3.52      | 2672     | .00  | 24.00 | 5.29     | 3.96      | 104.74             | <.001    | .02                   |
| Marriage hopes (1-5)                      | 4800     | 1.00 | 5.00  | 3.85     | .60       | 1829     | 1.00 | 5.00  | 3.85     | .59       | 2971     | 1.00 | 5.00  | 3.84     | .60       | .39                | .532     | .00                   |
| Marriage worries (1-5)                    | 4801     | 1.00 | 5.00  | 2.37     | .68       | 1829     | 1.00 | 5.00  | 2.51     | .69       | 2972     | 1.00 | 5.00  | 2.29     | .66       | 126.53             | <.001    | .03                   |
| Quality of relationship with twin (1-5)   | 4710     | 1.00 | 5.00  | 3.94     | .88       | 1785     | 1.00 | 5.00  | 3.72     | .87       | 2925     | 1.00 | 5.00  | 4.07     | .86       | 179.85             | <.001    | .04                   |
| Quality of relationship with mother (1-5) | 4658     | 1.00 | 5.00  | 3.83     | .96       | 1764     | 1.00 | 5.00  | 3.71     | .89       | 2894     | 1.00 | 5.00  | 3.91     | 1.00      | 52.03              | <.001    | .01                   |
| Quality of relationship with father (1-5) | 4541     | 1.00 | 5.00  | 3.27     | 1.06      | 1716     | 1.00 | 5.00  | 3.26     | 1.01      | 2825     | 1.00 | 5.00  | 3.27     | 1.09      | .20                | .654     | .00                   |
| Number of relationships (0-4)             | 4798     | .00  | 4.00  | 1.22     | .80       | 1827     | .00  | 4.00  | 1.24     | .85       | 2971     | .00  | 4.00  | 1.20     | .76       | 2.47               | .116     | .00                   |
| Longest relationship (1-5)                | 4022     | 1.00 | 5.00  | 3.13     | 1.20      | 1510     | 1.00 | 5.00  | 2.91     | 1.20      | 2512     | 1.00 | 5.00  | 3.26     | 1.19      | 81.70              | <.001    | .02                   |
| Partner violence (1-5)                    | 4642     | 1.00 | 5.00  | 1.77     | .96       | 1749     | 1.00 | 5.00  | 1.75     | .82       | 2893     | 1.00 | 5.00  | 1.78     | 1.03      | 1.39               | .239     | .00                   |
| Contact with mother (1-6)                 | 1960     | 1.00 | 6.00  | 3.17     | 1.19      | 708      | 1.00 | 6.00  | 2.91     | 1.10      | 1252     | 1.00 | 6.00  | 3.31     | 1.22      | 54.86              | <.001    | .03                   |
| Communication with mother (0-6)           | 1999     | .00  | 6.00  | 4.72     | 1.13      | 722      | .00  | 6.00  | 4.33     | 1.10      | 1277     | .00  | 6.00  | 4.94     | 1.10      | 143.39             | <.001    | .07                   |

|                                     |      |      |      |      |      |      |      |      |      |      |      |      |      |      |      |        |       |     |
|-------------------------------------|------|------|------|------|------|------|------|------|------|------|------|------|------|------|------|--------|-------|-----|
| Communication with mother (1-6)     | 2140 | 1.00 | 6.00 | 3.02 | 1.19 | 772  | 1.00 | 6.00 | 2.88 | 1.13 | 1368 | 1.00 | 6.00 | 3.11 | 1.21 | 19.06  | <.001 | .01 |
| Communication with father (0-6)     | 2335 | .00  | 6.00 | 3.72 | 1.56 | 840  | .00  | 6.00 | 3.57 | 1.51 | 1495 | .00  | 6.00 | 3.80 | 1.59 | 12.40  | <.001 | .01 |
| Peer pressure (1-5)                 | 4745 | 1.00 | 5.00 | 1.96 | .72  | 1812 | 1.00 | 4.57 | 2.08 | .74  | 2933 | 1.00 | 5.00 | 1.90 | .70  | 7.32   | <.001 | .01 |
| Physical peer victimisation (0-8)   | 4196 | .00  | 8.00 | .23  | .88  | 1566 | .00  | 8.00 | .39  | 1.12 | 2630 | .00  | 8.00 | .14  | .68  | 63.59  | <.001 | .02 |
| Social peer victimisation (0-8)     | 4195 | .00  | 8.00 | .74  | 1.55 | 1566 | .00  | 8.00 | .70  | 1.47 | 2629 | .00  | 8.00 | .77  | 1.60 | 1.69   | .194  | .00 |
| Verbal peer victimisation (0-8)     | 4195 | .00  | 8.00 | 2.03 | 2.53 | 1565 | .00  | 8.00 | 2.47 | 2.69 | 2630 | .00  | 8.00 | 1.77 | 2.39 | 71.07  | <.001 | .02 |
| Cyber peer victimisation (0-8)      | 4195 | .00  | 8.00 | .59  | 1.43 | 1565 | .00  | 8.00 | .50  | 1.36 | 2630 | .00  | 8.00 | .63  | 1.47 | 8.82   | .003  | .00 |
| Physical peer Perpetration (0-8)    | 4195 | .00  | 8.00 | .16  | .74  | 1564 | .00  | 8.00 | .32  | 1.06 | 2631 | .00  | 7.00 | .07  | .44  | 79.75  | <.001 | .03 |
| Social peer Perpetration (0-8)      | 4195 | .00  | 8.00 | .42  | .90  | 1564 | .00  | 8.00 | .41  | .88  | 2631 | .00  | 8.00 | .43  | .92  | .88    | .349  | .00 |
| Verbal peer Perpetration (0-8)      | 4195 | .00  | 8.00 | 1.53 | 2.14 | 1564 | .00  | 8.00 | 2.05 | 2.49 | 2631 | .00  | 8.00 | 1.22 | 1.84 | 129.84 | <.001 | .03 |
| Cyber peer Perpetration (0-8)       | 4195 | .00  | 8.00 | .27  | .89  | 1564 | .00  | 8.00 | .29  | .95  | 2631 | .00  | 8.00 | .26  | .85  | 1.17   | .280  | .00 |
| Parental role aspirations (1-5)     | 4334 | 1.00 | 5.00 | 4.18 | .76  | 1612 | 1.00 | 5.00 | 4.06 | .77  | 2722 | 1.00 | 5.00 | 4.25 | .74  | 62.14  | <.001 | .01 |
| Occupational role aspirations (1-5) | 4336 | 1.00 | 5.00 | 3.96 | .57  | 1614 | 1.00 | 5.00 | 3.94 | .58  | 2722 | 1.25 | 5.00 | 3.97 | .56  | 2.21   | .137  | .00 |
| Homecare role aspirations (1-5)     | 4336 | 1.00 | 5.00 | 3.98 | .64  | 1614 | 1.00 | 5.00 | 3.86 | .68  | 2722 | 1.75 | 5.00 | 4.05 | .60  | 89.96  | <.001 | .02 |

|                                            |      |      |       |       |      |      |      |       |       |      |      |      |       |       |      |        |       |     |
|--------------------------------------------|------|------|-------|-------|------|------|------|-------|-------|------|------|------|-------|-------|------|--------|-------|-----|
| Importance of Relationships (0-20)         | 4859 | .00  | 2.00  | 15.93 | 3.49 | 1860 | .00  | 2.00  | 14.81 | 3.79 | 2999 | .00  | 2.00  | 16.62 | 3.09 | 301.17 | <.001 | .06 |
| Achievement Motivation (0-16)              | 4859 | .00  | 16.00 | 1.24  | 2.85 | 1860 | .00  | 16.00 | 1.16  | 3.00 | 2999 | .00  | 16.00 | 1.28  | 2.75 | 2.27   | .132  | .00 |
| Purpose in Life (1-5)                      | 4854 | 1.00 | 5.00  | 3.46  | .80  | 1858 | 1.00 | 5.00  | 3.38  | .81  | 2996 | 1.00 | 5.00  | 3.51  | .80  | 26.79  | <.001 | .01 |
| Importance of democracy and equality (1-5) | 4846 | 1.00 | 5.00  | 4.28  | .55  | 1854 | 1.00 | 5.00  | 4.20  | .58  | 2992 | 1.00 | 5.00  | 4.32  | .53  | 52.04  | <.001 | .01 |
| Environmental concerns (1-5)               | 4851 | 1.00 | 5.00  | 3.72  | .69  | 1857 | 1.00 | 5.00  | 3.71  | .72  | 2994 | 1.00 | 5.00  | 3.73  | .67  | 1.06   | .303  | .00 |
| Religiosity (0-25)                         | 4751 | .00  | 25.00 | 4.43  | 4.98 | 1816 | .00  | 25.00 | 3.99  | 4.85 | 2935 | .00  | 25.00 | 4.70  | 5.04 | 23.80  | <.001 | .00 |
| Importance of leisure (1-5)                | 4243 | 1.00 | 5.00  | 3.83  | .77  | 1569 | 1.00 | 5.00  | 3.94  | .75  | 2674 | 1.00 | 5.00  | 3.76  | .77  | 6.63   | <.001 | .01 |
| Alcohol use (0-40)                         | 3889 | .00  | 36.00 | 8.13  | 5.01 | 1461 | .00  | 36.00 | 8.76  | 5.29 | 2428 | .00  | 34.00 | 7.75  | 4.79 | 35.78  | <.001 | .01 |
| Ever smoked (0-1)                          | 4254 | .00  | 1.00  | .57   | .50  | 1579 | .00  | 1.00  | .57   | .50  | 2675 | .00  | 1.00  | .56   | .50  | .42    | .518  | .00 |
| Ever vaped (0-1)                           | 4254 | .00  | 1.00  | .27   | .44  | 1578 | .00  | 1.00  | .31   | .46  | 2676 | .00  | 1.00  | .24   | .43  | 24.64  | <.001 | .01 |
| Cognitive enhancers (0-12)                 | 4213 | .00  | 12.00 | 1.19  | 1.95 | 1560 | .00  | 12.00 | 1.42  | 2.14 | 2653 | .00  | 12.00 | 1.06  | 1.82 | 32.00  | <.001 | .01 |
| Big 5 Agreeableness (1-5)                  | 4708 | 1.00 | 5.00  | 3.71  | .57  | 1834 | 1.00 | 5.00  | 3.55  | .58  | 2874 | 1.33 | 5.00  | 3.81  | .54  | 246.80 | <.001 | .05 |
| Big 5 Conscientiousness (1-5)              | 4702 | 1.00 | 5.00  | 3.87  | .62  | 1832 | 1.00 | 5.00  | 3.76  | .65  | 2870 | 1.17 | 5.00  | 3.93  | .59  | 78.99  | <.001 | .02 |
| Big 5 Extraversion (1-5)                   | 4726 | 1.00 | 5.00  | 3.50  | .66  | 1843 | 1.00 | 5.00  | 3.42  | .68  | 2883 | 1.00 | 5.00  | 3.55  | .63  | 4.33   | <.001 | .01 |
| Big 5 Neuroticism (1-5)                    | 4733 | 1.00 | 4.83  | 2.64  | .66  | 1847 | 1.00 | 4.67  | 2.51  | .63  | 2886 | 1.00 | 4.83  | 2.72  | .67  | 116.17 | <.001 | .02 |
| Big 5 Openness (1-5)                       | 4715 | 1.00 | 5.00  | 3.42  | .61  | 1838 | 1.00 | 5.00  | 3.39  | .63  | 2877 | 1.25 | 5.00  | 3.44  | .60  | 7.29   | .007  | .00 |
| Self-control (0-24)                        | 4699 | .00  | 24.00 | 14.33 | 4.20 | 1831 | .00  | 24.00 | 13.73 | 4.36 | 2868 | .00  | 24.00 | 14.72 | 4.05 | 6.13   | <.001 | .01 |

|                                                 |      |      |       |       |      |      |      |       |       |      |      |      |       |       |      |        |       |     |
|-------------------------------------------------|------|------|-------|-------|------|------|------|-------|-------|------|------|------|-------|-------|------|--------|-------|-----|
| Not planning for the future (1-5)               | 4697 | 1.00 | 5.00  | 2.47  | .94  | 1831 | 1.00 | 5.00  | 2.64  | .95  | 2866 | 1.00 | 5.00  | 2.35  | .92  | 105.81 | <.001 | .02 |
| Ambition (0-20)                                 | 4326 | .00  | 2.00  | 13.81 | 3.61 | 1610 | 1.00 | 2.00  | 13.80 | 3.74 | 2716 | .00  | 2.00  | 13.82 | 3.52 | .03    | .875  | .00 |
| Physical activity (1-5)                         | 4758 | 1.00 | 5.00  | 2.80  | 1.08 | 1804 | 1.00 | 5.00  | 2.93  | 1.10 | 2954 | 1.00 | 5.00  | 2.71  | 1.06 | 44.39  | <.001 | .01 |
| Health behaviours (0-48)                        | 4769 | 1.00 | 48.00 | 25.27 | 6.65 | 1811 | 1.00 | 48.00 | 24.81 | 6.75 | 2958 | 1.00 | 46.00 | 25.55 | 6.57 | 13.75  | <.001 | .00 |
| Risk taking behaviour (0-24)                    | 4697 | .00  | 23.00 | 6.51  | 3.58 | 1830 | .00  | 21.00 | 7.54  | 3.82 | 2867 | .00  | 23.00 | 5.86  | 3.25 | 244.01 | <.001 | .05 |
| Risky sexual behaviour (0-16)                   | 4554 | .00  | 12.67 | 4.22  | 2.75 | 1736 | .00  | 12.67 | 4.02  | 2.75 | 2818 | .00  | 12.00 | 4.34  | 2.75 | 14.52  | <.001 | .00 |
| Media use (0-20)                                | 4719 | .00  | 2.00  | 12.90 | 3.24 | 1794 | .00  | 2.00  | 11.99 | 3.53 | 2925 | .00  | 2.00  | 13.45 | 2.91 | 217.54 | <.001 | .05 |
| Volunteering (0-20)                             | 4754 | .00  | 19.00 | 5.65  | 3.24 | 1817 | .00  | 18.00 | 5.44  | 3.22 | 2937 | .00  | 19.00 | 5.77  | 3.24 | 11.97  | .001  | .00 |
| Internet dating (scale) (0-5)                   | 4706 | .00  | 5.00  | 2.79  | 2.17 | 1788 | .00  | 5.00  | 3.04  | 2.11 | 2918 | .00  | 5.00  | 2.64  | 2.19 | 39.25  | <.001 | .01 |
| Internet dating (y/n) (0-1)                     | 4717 | .00  | 1.00  | .46   | .50  | 1793 | .00  | 1.00  | .51   | .50  | 2924 | .00  | 1.00  | .44   | .50  | 21.50  | <.001 | .00 |
| Financial literacy: Knowledge of Products (0-4) | 4637 | .00  | 4.00  | 1.38  | .69  | 1778 | .00  | 4.00  | 1.55  | .73  | 2859 | .00  | 4.00  | 1.27  | .64  | 182.00 | <.001 | .04 |
| Financial attitudes and behaviour (1-5)         | 4636 | 1.17 | 5.00  | 3.54  | .61  | 1778 | 1.17 | 5.00  | 3.48  | .64  | 2858 | 1.17 | 5.00  | 3.59  | .59  | 34.52  | <.001 | .01 |

Note. Raw uncorrected scores were used. These results are based on one twin randomly selected from each pair so that the data points are independent.

<sup>a</sup> *F* and *p* values are reported with Welch's correction (Welch, 1951) as the assumption of homogeneity of variance was violated for several variables.

**Table S2.** Descriptive statistics for psychological traits, for five sex and zygosity groups.

| Trait (possible range)                    | MZ males |          |           | DZ males |          |           | MZ females |          |           | DZ females |          |           | DZ opposite sex |          |           | ANOVA    |                  |                                     |
|-------------------------------------------|----------|----------|-----------|----------|----------|-----------|------------|----------|-----------|------------|----------|-----------|-----------------|----------|-----------|----------|------------------|-------------------------------------|
|                                           | <i>n</i> | <i>M</i> | <i>SD</i> | <i>n</i> | <i>M</i> | <i>SD</i> | <i>n</i>   | <i>M</i> | <i>SD</i> | <i>n</i>   | <i>M</i> | <i>SD</i> | <i>n</i>        | <i>M</i> | <i>SD</i> | Zygosity | Sex*<br>Zygosity | <i>R</i> <sup>2</sup><br>(adjusted) |
| Daily hassles (0-28)                      | 543      | 11.76    | 4.63      | 478      | 11.94    | 4.59      | 1055       | 12.88    | 4.69      | 893        | 12.97    | 4.64      | 1313            | 12.51    | 4.53      | .80      | .21              | .013 (.010)                         |
| CHAOS (0-12)                              | 606      | 3.69     | 2.09      | 555      | 3.80     | 2.10      | 1152       | 3.76     | 2.27      | 993        | 3.95     | 2.35      | 1514            | 3.76     | 2.17      | .29      | 3.65             | .004 (.001)                         |
| Childhood experiences (0-32)              | 544      | 5.36     | 3.80      | 475      | 5.06     | 4.19      | 1052       | 5.50     | 5.22      | 892        | 5.23     | 4.52      | 1316            | 5.22     | 4.48      | .26      | .34              | .001 (-.002)                        |
| Poor sleep quality (0-24)                 | 534      | 4.04     | 3.70      | 470      | 4.03     | 3.29      | 1031       | 5.45     | 4.08      | 882        | 5.17     | 3.82      | 1291            | 4.75     | 3.78      | .00      | 1.24             | .025 (.022)                         |
| Marriage hopes (1-5)                      | 593      | 3.85     | .58       | 548      | 3.89     | .60       | 1134       | 3.85     | .61       | 978        | 3.82     | .58       | 1494            | 3.85     | .60       | 1.55     | .05              | .002 (-.001)                        |
| Marriage worries (1-5)                    | 593      | 2.49     | .68       | 548      | 2.50     | .66       | 1134       | 2.27     | .67       | 978        | 2.29     | .66       | 1495            | 2.40     | .70       | .03      | .04              | .033 (.030)                         |
| Quality of relationship with twin (1-5)   | 580      | 4.07     | .79       | 537      | 3.57     | .84       | 1114       | 4.35     | .78       | 962        | 4.04     | .83       | 1465            | 3.64     | .89       | 8.22**   | .00              | .106 (.103)                         |
| Quality of relationship with mother (1-5) | 569      | 3.68     | .93       | 534      | 3.73     | .87       | 1105       | 3.91     | 1.01      | 948        | 3.91     | .99       | 1452            | 3.84     | .95       | .19      | .14              | .009 (.006)                         |
| Quality of relationship with father (1-5) | 559      | 3.25     | 1.07      | 514      | 3.32     | .96       | 1075       | 3.25     | 1.11      | 923        | 3.24     | 1.09      | 1421            | 3.28     | 1.05      | .09      | .92              | .001 (-.002)                        |
| Number of relationships (0-4)             | 593      | 1.18     | .86       | 546      | 1.28     | .84       | 1132       | 1.18     | .78       | 979        | 1.20     | .73       | 1495            | 1.26     | .81       | .00      | 2.41             | .005 (.003)                         |
| Longest relationship (1-5)                | 473      | 2.94     | 1.18      | 467      | 2.97     | 1.22      | 939        | 3.26     | 1.18      | 839        | 3.26     | 1.22      | 1260            | 3.08     | 1.19      | .36      | .10              | .019 (.016)                         |
| Partner violence (1-5)                    | 569      | 1.73     | .82       | 523      | 1.74     | .84       | 1099       | 1.76     | 1.02      | 956        | 1.78     | 1.03      | 1442            | 1.79     | .94       | .04      | .03              | .001 (-.002)                        |
| Contact with mother (1-6)                 | 254      | 3.00     | 1.15      | 195      | 2.87     | 1.02      | 482        | 3.31     | 1.22      | 419        | 3.38     | 1.27      | 598             | 3.07     | 1.15      | .99      | .34              | .023 (.020)                         |
| Communication with mother (0-6)           | 258      | 4.40     | 1.10      | 199      | 4.34     | 1.06      | 494        | 4.91     | 1.18      | 425        | 5.02     | 1.07      | 610             | 4.63     | 1.10      | .00      | .08              | .103 (.100)                         |
| Communication with mother (1-6)           | 270      | 2.97     | 1.21      | 218      | 2.90     | 1.10      | 516        | 3.05     | 1.18      | 460        | 3.22     | 1.29      | 658             | 2.94     | 1.12      | .08      | 1.08             | .009 (.006)                         |
| Communication with father (0-6)           | 297      | 3.62     | 1.57      | 233      | 3.64     | 1.46      | 571        | 3.73     | 1.61      | 498        | 3.90     | 1.60      | 718             | 3.65     | 1.53      | .26      | .13              | .019 (.016)                         |
| Peer pressure (1-5)                       | 585      | 1.98     | .71       | 546      | 2.06     | .74       | 1118       | 1.87     | .68       | 968        | 1.89     | .70       | 1479            | 2.04     | .74       | 3.50     | .53              | .015 (.012)                         |
| Physical peer victimisation (0-8)         | 528      | .39      | 1.16      | 469      | .44      | 1.12      | 1020       | .14      | .70       | 869        | .11      | .55       | 1269            | .25      | .94       | .41      | .53              | .035 (.032)                         |
| Social peer victimisation (0-8)           | 528      | .63      | 1.33      | 469      | .69      | 1.50      | 1020       | .74      | 1.58      | 869        | .78      | 1.60      | 1268            | .79      | 1.59      | .56      | .90              | .001 (-.001)                        |
| Verbal peer victimisation (0-8)           | 528      | 2.28     | 2.59      | 468      | 2.57     | 2.71      | 1020       | 1.64     | 2.34      | 869        | 1.77     | 2.35      | 1269            | 2.23     | 2.64      | 2.56     | 1.18             | .036 (.034)                         |



|                                            |     |       |      |     |       |      |      |       |      |     |       |      |      |       |      |      |       |              |
|--------------------------------------------|-----|-------|------|-----|-------|------|------|-------|------|-----|-------|------|------|-------|------|------|-------|--------------|
| Cyber peer victimisation (0-8)             | 528 | .49   | 1.35 | 468 | .54   | 1.37 | 1020 | .63   | 1.47 | 869 | .58   | 1.41 | 1269 | .60   | 1.47 | .03  | .40   | .001 (-.001) |
| Physical peer Perpetration (0-8)           | 526 | .34   | 1.14 | 469 | .36   | 1.07 | 1020 | .07   | .44  | 870 | .07   | .42  | 1269 | .17   | .73  | 1.15 | 2.85  | .044 (.041)  |
| Social peer Perpetration (0-8)             | 526 | .40   | .83  | 469 | .40   | .94  | 1020 | .42   | .92  | 870 | .43   | .93  | 1269 | .43   | .88  | .01  | .02   | .000 (-.003) |
| Verbal peer Perpetration (0-8)             | 526 | 1.92  | 2.45 | 469 | 2.01  | 2.48 | 1020 | 1.08  | 1.73 | 870 | 1.28  | 1.87 | 1269 | 1.74  | 2.26 | 2.75 | .00   | .040 (.038)  |
| Cyber peer Perpetration (0-8)              | 526 | .24   | .82  | 469 | .33   | 1.07 | 1020 | .25   | .85  | 870 | .23   | .76  | 1269 | .30   | .96  | 2.12 | .21   | .006 (.003)  |
| Parental role aspirations (1-5)            | 548 | 4.07  | .76  | 476 | 4.03  | .74  | 1057 | 4.27  | .71  | 895 | 4.25  | .73  | 1316 | 4.16  | .80  | .03  | .00   | .007 (.004)  |
| Occupational role aspirations (1-5)        | 548 | 3.94  | .58  | 476 | 3.91  | .60  | 1057 | 3.98  | .55  | 895 | 3.96  | .57  | 1318 | 3.97  | .57  | .08  | .10   | .001 (-.002) |
| Homecare role aspirations (1-5)            | 548 | 3.90  | .68  | 476 | 3.81  | .69  | 1057 | 4.08  | .60  | 895 | 4.04  | .58  | 1318 | 3.96  | .65  | .45  | .20   | .012 (.010)  |
| Importance of Relationships (0-20)         | 603 | 14.74 | 3.90 | 556 | 14.85 | 3.73 | 1141 | 16.65 | 3.11 | 993 | 16.53 | 3.06 | 1512 | 15.87 | 3.51 | .96  | 1.31  | .060 (.057)  |
| Achievement Motivation (0-16)              | 603 | 1.26  | 3.01 | 556 | 1.06  | 3.06 | 1141 | 1.30  | 2.77 | 993 | 1.31  | 2.69 | 1512 | 1.20  | 2.87 | 1.87 | 3.96* | .004 (.002)  |
| Purpose in Life (1-5)                      | 602 | 3.40  | .83  | 556 | 3.39  | .80  | 1139 | 3.52  | .80  | 993 | 3.48  | .78  | 1510 | 3.45  | .80  | .06  | .80   | .005 (.002)  |
| Importance of democracy and equality (1-5) | 602 | 4.22  | .57  | 554 | 4.22  | .54  | 1135 | 4.31  | .51  | 992 | 4.31  | .54  | 1508 | 4.27  | .59  | 1.48 | .01   | .021 (.018)  |
| Environmental concerns (1-5)               | 602 | 3.70  | .73  | 556 | 3.74  | .70  | 1137 | 3.72  | .65  | 992 | 3.75  | .69  | 1509 | 3.70  | .70  | 1.36 | .10   | .002 (-.001) |
| Religiosity (0-25)                         | 586 | 4.28  | 5.30 | 548 | 4.07  | 4.83 | 1119 | 4.87  | 5.25 | 968 | 4.45  | 4.73 | 1480 | 4.22  | 4.79 | 1.00 | .27   | .004 (.001)  |
| Importance of leisure (1-5)                | 528 | 3.93  | .76  | 471 | 3.97  | .73  | 1031 | 3.72  | .77  | 885 | 3.75  | .78  | 1286 | 3.88  | .76  | 1.60 | 1.37  | .018 (.016)  |
| Alcohol use (0-40)                         | 484 | 8.56  | 5.29 | 436 | 8.76  | 5.24 | 932  | 7.49  | 4.68 | 807 | 7.88  | 4.94 | 1195 | 8.41  | 5.05 | .11  | 1.63  | .008 (.005)  |
| Ever smoked (0-1)                          | 530 | .52   | .50  | 471 | .58   | .49  | 1034 | .54   | .50  | 883 | .57   | .50  | 1295 | .61   | .49  | 2.33 | 1.01  | .006 (.003)  |
| Ever vaped (0-1)                           | 530 | .30   | .46  | 472 | .29   | .45  | 1035 | .22   | .42  | 884 | .24   | .43  | 1292 | .30   | .46  | 1.76 | 2.09  | .005 (.003)  |
| Cognitive enhancers (0-12)                 | 521 | 1.30  | 2.07 | 467 | 1.36  | 2.11 | 1029 | 1.07  | 1.88 | 876 | 1.05  | 1.76 | 1280 | 1.29  | 2.03 | .33  | .05   | .003 (.001)  |
| Big 5 Agreeableness (1-5)                  | 598 | 3.56  | .55  | 551 | 3.55  | .58  | 1095 | 3.83  | .53  | 956 | 3.80  | .54  | 1459 | 3.68  | .59  | .57  | .18   | .046 (.044)  |

|                                                 |     |       |      |     |       |      |      |       |      |     |       |      |      |       |      |       |       |             |
|-------------------------------------------------|-----|-------|------|-----|-------|------|------|-------|------|-----|-------|------|------|-------|------|-------|-------|-------------|
| Big 5 Conscientiousness (1-5)                   | 598 | 3.83  | .62  | 550 | 3.74  | .67  | 1094 | 3.96  | .57  | 954 | 3.91  | .59  | 1457 | 3.83  | .63  | 2.05  | .35   | .012 (.009) |
| Big 5 Extraversion (1-5)                        | 601 | 3.39  | .70  | 552 | 3.44  | .67  | 1101 | 3.52  | .63  | 956 | 3.54  | .64  | 1466 | 3.53  | .65  | .00   | .13   | .010 (.008) |
| Big 5 Neuroticism (1-5)                         | 602 | 2.50  | .63  | 553 | 2.53  | .64  | 1104 | 2.73  | .66  | 956 | 2.73  | .67  | 1468 | 2.60  | .66  | .43   | .13   | .034 (.032) |
| Big 5 Openness (1-5)                            | 600 | 3.39  | .61  | 552 | 3.39  | .63  | 1098 | 3.42  | .60  | 956 | 3.45  | .60  | 1460 | 3.41  | .62  | 3.32  | .44   | .007 (.004) |
| Self-control (0-24)                             | 598 | 14.02 | 4.21 | 550 | 13.73 | 4.43 | 1092 | 14.92 | 4.00 | 954 | 14.47 | 4.12 | 1456 | 14.18 | 4.25 | 1.89  | 4.02* | .019 (.016) |
| Not planning for the future (1-5)               | 598 | 2.60  | .95  | 550 | 2.64  | .94  | 1092 | 2.34  | .93  | 952 | 2.37  | .92  | 1456 | 2.51  | .95  | .21   | .12   | .021 (.018) |
| Ambition (0-20)                                 | 544 | 13.93 | 3.69 | 478 | 13.65 | 3.84 | 1055 | 13.86 | 3.55 | 893 | 13.79 | 3.52 | 1314 | 13.81 | 3.61 | 2.32  | 1.36  | .003 (.001) |
| Physical activity (1-5)                         | 585 | 2.95  | 1.11 | 543 | 2.92  | 1.09 | 1129 | 2.67  | 1.07 | 970 | 2.68  | 1.03 | 1478 | 2.87  | 1.09 | .83   | .22   | .011 (.008) |
| Health behaviours (0-48)                        | 588 | 24.85 | 6.56 | 543 | 24.89 | 6.85 | 1129 | 25.41 | 6.62 | 973 | 25.49 | 6.48 | 1483 | 25.30 | 6.73 | .62   | .89   | .003 (.000) |
| Risk taking behaviour (0-24)                    | 598 | 7.26  | 3.86 | 548 | 7.44  | 3.73 | 1093 | 5.59  | 3.10 | 953 | 5.92  | 3.43 | 1457 | 6.96  | 3.61 | 5.71* | 2.78  | .046 (.044) |
| Risky sexual behaviour (0-16)                   | 561 | 3.91  | 2.85 | 522 | 4.02  | 2.71 | 1071 | 4.16  | 2.80 | 923 | 4.38  | 2.71 | 1427 | 4.37  | 2.71 | .93   | 9.93* | .018 (.015) |
| Media use (0-20)                                | 581 | 11.91 | 3.67 | 540 | 11.88 | 3.61 | 1122 | 13.48 | 2.89 | 958 | 13.45 | 2.82 | 1466 | 12.85 | 3.22 | 3.17  | 2.13  | .042 (.039) |
| Volunteering (0-20)                             | 586 | 5.57  | 3.24 | 548 | 5.51  | 3.19 | 1120 | 5.66  | 3.29 | 969 | 5.82  | 3.21 | 1481 | 5.61  | 3.21 | 1.86  | 6.48* | .010 (.008) |
| Internet dating (scale) (0-5)                   | 579 | 3.00  | 2.14 | 541 | 2.92  | 2.09 | 1116 | 2.57  | 2.19 | 959 | 2.59  | 2.21 | 1459 | 2.98  | 2.13 | .29   | .98   | .014 (.012) |
| Internet dating (y/n) (0-1)                     | 581 | .50   | .50  | 542 | .47   | .50  | 1120 | .42   | .49  | 960 | .43   | .50  | 1462 | .50   | .50  | .86   | 1.79  | .011 (.008) |
| Financial literacy: Knowledge of Products (0-4) | 582 | 1.60  | .75  | 539 | 1.56  | .73  | 1088 | 1.26  | .63  | 936 | 1.30  | .65  | 1440 | 1.38  | .67  | .79   | .79   | .046 (.043) |
| Financial attitudes and behaviour (1-5)         | 582 | 3.53  | .60  | 539 | 3.45  | .65  | 1088 | 3.59  | .59  | 936 | 3.59  | .59  | 1439 | 3.52  | .63  | .20   | .80   | .018 (.015) |

Note. MZ=monozygotic; DZ=dizygotic. Raw uncorrected scores were used. These results are based on one twin randomly selected from each pair so that the data points are independent.

Group difference = *F* statistics; \*\**p* < .05. \*\*\**p* < .001.

**Table S3. Summary of measured variables used**

| Theme                                     | Variable name                     | Scale/item <sup>a</sup>                              | No. of items used | Reference <sup>b</sup>                                                                                                                                                                                                                                                                                                           |
|-------------------------------------------|-----------------------------------|------------------------------------------------------|-------------------|----------------------------------------------------------------------------------------------------------------------------------------------------------------------------------------------------------------------------------------------------------------------------------------------------------------------------------|
| <b>Emerging adulthood trait variables</b> |                                   |                                                      |                   |                                                                                                                                                                                                                                                                                                                                  |
| <b>Life experiences</b>                   | Daily hassles                     | Hassles                                              | 7                 | Delongis, A., Folkman, S. and Lazarus, R. S. (1988)                                                                                                                                                                                                                                                                              |
|                                           | CHAOS                             | CHAOS<br>(Confusion, Hubbub and Order Scale) at home | 6                 | Matheny, Wachs, Ludwig and Phillips (1995)                                                                                                                                                                                                                                                                                       |
|                                           | Childhood experiences             | Childhood experiences                                | 8                 | Taken from the ALSPAC "Life at 22+" questionnaire (section H) with some minor changes in wording:<br><br><a href="http://www.bristol.ac.uk/media-library/sites/alspac/documents/questionnaires/YPB-life-at-22-plus.pdf">http://www.bristol.ac.uk/media-library/sites/alspac/documents/questionnaires/YPB-life-at-22-plus.pdf</a> |
|                                           | Sleep quality                     | The Pittsburgh Sleep Quality Index (PSQI)            | 8                 | Buyse D.J., Reynolds C.F., Monk T.H., Berman S.R. & Kupfer D.J. (1989)                                                                                                                                                                                                                                                           |
| <b>Relationships</b>                      | Marriage hopes                    | Marriage hopes                                       | 4                 | Kahn, S. (2007)                                                                                                                                                                                                                                                                                                                  |
|                                           | Marriage worries                  | Marriage worries                                     | 4                 | Kahn, S. (2007)                                                                                                                                                                                                                                                                                                                  |
|                                           | Quality of relationship with twin | Relationship with twin                               | 5                 | Riggio, H. R. (2000)                                                                                                                                                                                                                                                                                                             |

|  |                                     |                                     |   |                                                                                                                                                                                                                                                                                                                         |
|--|-------------------------------------|-------------------------------------|---|-------------------------------------------------------------------------------------------------------------------------------------------------------------------------------------------------------------------------------------------------------------------------------------------------------------------------|
|  | Quality of relationship with mother | Relationship with mother            | 5 | Fraley, R. C., Heffernan, M. E., Vicary, A. M., & Brumbaugh, C. C. (2011)                                                                                                                                                                                                                                               |
|  | Quality of relationship with father | Relationship with father            | 5 | Fraley, R. C., Heffernan, M. E., Vicary, A. M., & Brumbaugh, C. C. (2011)                                                                                                                                                                                                                                               |
|  | Number of relationships             | Number of relationships             | 1 | Item created by the TEDS team.                                                                                                                                                                                                                                                                                          |
|  | Longest relationship                | Longest relationship                | 1 | Item created by the TEDS team.                                                                                                                                                                                                                                                                                          |
|  | Partner violence                    | Intimate Partner Violence Questions | 6 | Adapted from the 'Intimate Partner Violence Questions' section of the CDC<br><br>(Centers for Disease Control and Prevention) Violence Prevention questionnaire:<br><a href="https://www.cdc.gov/violenceprevention/pdf/ipv/ipvandscreening.pdf">https://www.cdc.gov/violenceprevention/pdf/ipv/ipvandscreening.pdf</a> |
|  | Contact with mother                 | Parent contact                      | 3 | Items created by TEDS researchers.                                                                                                                                                                                                                                                                                      |
|  | Communication with mother           | Parent contact                      | 2 | Items created by TEDS researchers.                                                                                                                                                                                                                                                                                      |
|  | Contact with father                 | Parent contact                      | 3 | Items created by TEDS researchers.                                                                                                                                                                                                                                                                                      |
|  | Communication with father           | Parent contact                      | 2 | Items created by TEDS researchers.                                                                                                                                                                                                                                                                                      |
|  | Peer pressure                       | Peer pressure                       | 7 | Shortened from Santor, D. A., Messervey, D., & Kusumakar, V. (2000)                                                                                                                                                                                                                                                     |

|                    |                               |                                             |   |                                                               |
|--------------------|-------------------------------|---------------------------------------------|---|---------------------------------------------------------------|
|                    | Physical peer victimisation   | Multidimensional Peer Victimisation Scale   | 4 | Mynard, H., and Joseph (2000)                                 |
|                    | Social peer victimisation     | Multidimensional Peer Victimisation Scale   | 4 | Mynard, H., and Joseph (2000)                                 |
|                    | Verbal peer victimisation     | Multidimensional Peer Victimisation Scale   | 4 | Mynard, H., and Joseph (2000)                                 |
|                    | Cyber peer victimisation      | Multidimensional Peer Victimisation Scale   | 4 | Mynard, H., and Joseph (2000)                                 |
|                    | Physical peer Perpetration    | Multidimensional Peer Victimisation Scale   | 4 | Mynard, H., and Joseph (2000)                                 |
|                    | Social peer Perpetration      | Multidimensional Peer Victimisation Scale   | 4 | Mynard, H., and Joseph (2000)                                 |
|                    | Verbal peer Perpetration      | Multidimensional Peer Victimisation Scale   | 4 | Mynard, H., and Joseph (2000)                                 |
|                    | Cyber peer Perpetration       | Multidimensional Peer Victimisation Scale   | 4 | Mynard, H., and Joseph (2000)                                 |
| <b>Aspirations</b> | Parental role aspirations     | Life Role Saliene (LRSS), Parental role     | 4 | Amatea, E.S., Cross, E.G., Clark, J.E. and Bobby, C.L. (1986) |
|                    | Occupational role aspirations | Life Role Saliene (LRSS), Occupational role | 4 | Amatea, E.S., Cross, E.G., Clark, J.E. and Bobby, C.L. (1986) |

|                               |                                      |                                                         |    |                                                                                                                                                                                                                                          |
|-------------------------------|--------------------------------------|---------------------------------------------------------|----|------------------------------------------------------------------------------------------------------------------------------------------------------------------------------------------------------------------------------------------|
|                               | Homecare role aspirations            | Life Role Salience (LRSS), Homecare role                | 4  | Amatea, E.S., Cross, E.G., Clark, J.E. and Bobby, C.L. (1986)                                                                                                                                                                            |
| <b>Thoughts and attitudes</b> | Importance of Relationships          | GOALS – relationships                                   | 5  | Pöhlmann and Brunstein (1997)                                                                                                                                                                                                            |
|                               | Achievement Motivation               | GOALS – self-fulfilment                                 | 4  | Pöhlmann and Brunstein (1997)                                                                                                                                                                                                            |
|                               | Purpose in Life                      | Purpose in Life                                         | 5  | Crumbaugh and Maholick (1964)                                                                                                                                                                                                            |
|                               | Importance of democracy and equality | BSA Democracy and Government                            | 5  | Taken from the NatCen Social Research's British Social Attitudes (BSA) survey ( <a href="http://natcen.ac.uk/our-research/research/british-social-attitudes/">http://natcen.ac.uk/our-research/research/british-social-attitudes/</a> ). |
|                               | Environmental concerns               | BSA Environmental concerns                              | 6  | Taken from the NatCen Social Research's British Social Attitudes (BSA) Survey ( <a href="http://natcen.ac.uk/our-research/research/british-social-attitudes/">http://natcen.ac.uk/our-research/research/british-social-attitudes/</a> ). |
|                               | Religiosity                          | Religiosity: the Centrality of Religiosity Scale (CRS)  | 5  | Huber, S., & Huber, O. W. (2012)                                                                                                                                                                                                         |
|                               | Importance of leisure                | Leisure and Hobbies                                     | 5  | Lavallee, L. F., Hatch, P. M., Michalos, A. C., & McKinley, T. (2007).                                                                                                                                                                   |
| <b>Substance use</b>          | Alcohol use                          | Alcohol Use Disorders Identification Test (AUDIT) scale | 10 | Adapted from items 1-10 of the AUDIT scale: <a href="https://www.drugabuse.gov/sites/default/files/files/AUDIT.pdf">https://www.drugabuse.gov/sites/default/files/files/AUDIT.pdf</a>                                                    |
|                               | Ever smoked                          | Smoking (inc. vaping)                                   | 1  | Adapted from Heatherton, Kozlowski, Frecker, and Fagerstrom (1991)                                                                                                                                                                       |

|                    |                             |                                                                                                                   |    |                                                                                                                             |
|--------------------|-----------------------------|-------------------------------------------------------------------------------------------------------------------|----|-----------------------------------------------------------------------------------------------------------------------------|
|                    | Ever vaped                  | Smoking<br>(inc. vaping)                                                                                          | 1  | Adapted from Heatherston, Kozlowski, Frecker, and Fagerstrom (1991)                                                         |
|                    | Cognitive enhancers         | Cognitive Enhancers                                                                                               | 3  | Items created by the TEDS team.                                                                                             |
| <b>Personality</b> | Big 5 personality           | Big 5 Personality scale<br>(Agreeableness, conscientiousness, extraversion, neuroticism, and openness subscales). | 30 | Mullins-Sweatt, S. N., Jamerson, J. E., Samuel, D. B., Olson, D. R., Widiger, T. A. (2006).                                 |
|                    | Self-control                | Self-Control.                                                                                                     | 6  | Tangney, J. P., Boone, A. L., & Baumeister, R. F. (2018)                                                                    |
|                    | Not planning for the future | Consideration of Future Consequences Scale.                                                                       | 4  | Strathman, A., Gleicher, F., Boninger, D. S., & Edwards, C. S. (1994).                                                      |
|                    | Ambition                    | Grit: Perseverance and passion for long-term goals.                                                               | 5  | Duckworth, A.L., Peterson, C., Matthews, M.D., & Kelly, D.R. (2007)                                                         |
| <b>Behaviours</b>  | Physical activity           | Activity questionnaire                                                                                            | 3  | Questions devised by TEDS researchers.                                                                                      |
|                    | Health behaviours           | Rapid Eating and Activity Assessment for Patients<br><br>(REAP) Health Behaviours                                 | 12 | Adapted from Gans, K. M., Risica, P. M., Wylie-Rosett, J., Ross, E. M., Strolla, L. O., McMurray, J., & Eaton, C. B. (2006) |
|                    | Risk taking behaviour       | Risk taking index                                                                                                 | 6  | Nicholson, N., Soane, E., Fenton-O'Creivy, M., & Willman, P. (2005)                                                         |

|                                          |                                           |                                                |    |                                                                                                                                                                                                                                                                                                      |
|------------------------------------------|-------------------------------------------|------------------------------------------------|----|------------------------------------------------------------------------------------------------------------------------------------------------------------------------------------------------------------------------------------------------------------------------------------------------------|
|                                          | Risky sexual behaviour                    | Sexual Behaviours and Experience               | 5  | Adapted from the ALSPAC measure:<br><a href="http://www.bristol.ac.uk/media-library/sites/alspac/documents/questionnaires/YPC-me-at-23.pdf">http://www.bristol.ac.uk/media-library/sites/alspac/documents/questionnaires/YPC-me-at-23.pdf</a>                                                        |
|                                          | Media use                                 | Media and Technology Usage and Attitudes Scale | 4  | Rosen, Whaling, Carrier, Cheever, & Rökkum (2013)                                                                                                                                                                                                                                                    |
|                                          | Volunteering                              | Volunteering                                   | 5  | Adapted from page 42 of the ALSPAC questionnaire "It's all about you" at age 20: <a href="http://www.bristol.ac.uk/media-library/sites/alspac/migrated/documents/ques-yp20-all-about-you.pdf">http://www.bristol.ac.uk/media-library/sites/alspac/migrated/documents/ques-yp20-all-about-you.pdf</a> |
|                                          | Internet dating                           | Internet dating                                | 2  | Items created by TEDS researchers, in order to understand the proportion of emerging adults that take part in internet dating.                                                                                                                                                                       |
| <b>Financial attitudes and behaviour</b> | Financial literacy: Knowledge of Products | OECD Financial literacy/products               | 13 | Adapted from sections of the OECD instrument for measuring financial literacy:<br><a href="https://www.oecd.org/finance/financial-education/49319977.pdf">https://www.oecd.org/finance/financial-education/49319977.pdf</a>                                                                          |
|                                          | Financial attitudes and behaviour         | OECD Attitudes towards money                   | 6  | Adapted from sections of the OECD instrument for measuring financial literacy:<br><a href="https://www.oecd.org/finance/financial-education/49319977.pdf">https://www.oecd.org/finance/financial-education/49319977.pdf</a>                                                                          |
| <b>Wellbeing variables</b>               |                                           |                                                |    |                                                                                                                                                                                                                                                                                                      |
| -                                        | Love and Relationships                    | CLAS, Love and Relationships                   | 3  | Lavallee, Hatch, Michalos, and McKinley (2007)                                                                                                                                                                                                                                                       |
| -                                        | Community satisfaction                    | CLAS Life Satisfaction Scale, Community.       | 5  | Lavallee, Hatch, Michalos, and McKinley (2007)                                                                                                                                                                                                                                                       |



|                                |                     |                                                                        |    |                                                                                                                  |
|--------------------------------|---------------------|------------------------------------------------------------------------|----|------------------------------------------------------------------------------------------------------------------|
| -                              | Financial wellbeing | CLAS Financial wellbeing                                               | 5  | Lavallee, Hatch, Michalos, and McKinley (2007)                                                                   |
| <b>Mental health variables</b> |                     |                                                                        |    |                                                                                                                  |
| -                              | Conners             | Conners, 3rd edition. Impulsivity and inattention subscales.           | 20 | Conners, C. K. 2008)                                                                                             |
| -                              | Aggression          | Brief Aggression Questionnaire (BAQ).                                  | 8  | Webster, G. D., DeWall, C. N., Pond Jr, R. S., Deckman, T., Jonason, P. K., Le, B. M., ... & Smith, C. V. (2014) |
| -                              | Conduct problems    | SDQ, Conduct problems                                                  | 5  | Goodman (1997)                                                                                                   |
| -                              | Emotional problems  | SDQ, Emotional problems                                                | 5  | Goodman (1997)                                                                                                   |
| -                              | Hyperactivity       | SDQ, Hyperactivity                                                     | 5  | Goodman (1997)                                                                                                   |
| -                              | Peer problems       | SDQ, Peer problems                                                     | 5  | Goodman (1997)                                                                                                   |
| -                              | General anxiety     | General Anxiety: the Severity Measure for Generalized Anxiety Disorder | 10 | Craske et al. (2013)                                                                                             |
| -                              | Depression          | Short Mood and Feeling Questionnaire (SMFQ)                            | 8  | Adapted from Angold et al. (1995)                                                                                |
| -                              | Self-harm           | CASE, Self-harm                                                        | 2  | Adapted from Madge et al. (2008)                                                                                 |

|                                  |                                       |                                                                             |    |                                                                                                                                                                                                     |
|----------------------------------|---------------------------------------|-----------------------------------------------------------------------------|----|-----------------------------------------------------------------------------------------------------------------------------------------------------------------------------------------------------|
| -                                | Psychotic experiences, paranoia       | SPEQ: Specific Psychotic Experiences Questionnaire: Paranoia subscale       | 12 | Ronald, A., Sieradzka, D., Cardno, A. G., Haworth, C. M. A, McGuire, P., Freeman, D. (2014)                                                                                                         |
| -                                | Psychotic experiences, hallucinations | SPEQ: Specific Psychotic Experiences Questionnaire: Hallucinations subscale | 12 | Ronald, A., Sieradzka, D., Cardno, A. G., Haworth, C. M. A, McGuire, P., Freeman, D. (2014)                                                                                                         |
| <b>Physical health variables</b> |                                       |                                                                             |    |                                                                                                                                                                                                     |
| -                                | Use of painkillers                    | Use of over-the-counter painkillers                                         | 1  | Devised by TEDS researchers.                                                                                                                                                                        |
| -                                | Use of antibiotics                    | Use of antibiotics                                                          | 1  | Devised by TEDS researchers.                                                                                                                                                                        |
| -                                | General self-reported health          | RAND Short-Form Health Survey                                               | 5  | Adapted from Ware, J., Jr., & Sherbourne, C.D. The MOS 36-Item Short-Form Health Survey (SF-36): I. Conceptual Framework and Item Selection, in Medical Care, June 1992, Vol. 30, No. 6, pp 473-483 |
| -                                | Hospitalisation                       | RAND Short-Form Health Survey.                                              | 2  | Adapted from Ware, J., Jr., & Sherbourne, C.D. The MOS 36-Item Short-Form Health Survey (SF-36): I. Conceptual Framework and Item Selection, in Medical Care, June 1992, Vol. 30, No. 6, pp 473-483 |
| -                                | Short Health Economics                | Short Health Economics.<br><br>Questions from the EQ-5D-5L measure.         | 4  | Herdman M., Gudex, C., Lloyd, A. (2011).                                                                                                                                                            |

| Education variables |                            |                                  |   |                                        |
|---------------------|----------------------------|----------------------------------|---|----------------------------------------|
| -                   | Achieved educational level | Educational level (current)      | 1 | Questions devised by TEDS researchers. |
| -                   | Planned education level    | Educational level (aspirational) | 1 | Questions devised by TEDS researchers. |

<sup>a</sup> More information about the variables and the references can be found in the TEDS data dictionary ([http://www.teds.ac.uk/datadictionary/studies/measures/21yr\\_measures.htm](http://www.teds.ac.uk/datadictionary/studies/measures/21yr_measures.htm)).

<sup>b</sup> Note that measures were shortened and adapted from the referenced measures.



**Table S4.** Descriptive statistics for psychological traits, for the whole and males and females separately (repeated with the twin that was not randomly selected from each pair in the main analyses).

| Trait (possible range)                    | All      |      |       |          |           | Males    |      |       |          |           | Females  |      |       |          |           | ANOVA <sup>a</sup> |          |                       |
|-------------------------------------------|----------|------|-------|----------|-----------|----------|------|-------|----------|-----------|----------|------|-------|----------|-----------|--------------------|----------|-----------------------|
|                                           | <i>N</i> | Min  | Max   | <i>M</i> | <i>SD</i> | <i>n</i> | Min  | Max   | <i>M</i> | <i>SD</i> | <i>n</i> | Min  | Max   | <i>M</i> | <i>SD</i> | Sex                | <i>p</i> | <i>R</i> <sup>2</sup> |
| Daily hassles (0-28)                      | 4327     | .00  | 28.00 | 12.58    | 4.70      | 1553     | .00  | 28.00 | 11.96    | 4.67      | 2774     | .00  | 28.00 | 12.92    | 4.68      | 4.40               | .000     | .01                   |
| CHAOS (0-12)                              | 4856     | .00  | 12.00 | 3.85     | 2.22      | 1795     | .00  | 12.00 | 3.82     | 2.13      | 3061     | .00  | 12.00 | 3.87     | 2.27      | 4.05               | .044     | .00                   |
| Childhood experiences (0-32)              | 4323     | .00  | 32.00 | 5.34     | 4.56      | 1548     | .00  | 31.00 | 5.19     | 4.06      | 2775     | .00  | 32.00 | 5.43     | 4.81      | .19                | .665     | .00                   |
| Poor sleep quality (0-24)                 | 4239     | .00  | 24.00 | 4.95     | 3.90      | 1515     | .00  | 21.00 | 4.10     | 3.49      | 2724     | .00  | 24.00 | 5.43     | 4.04      | 104.74             | .000     | .02                   |
| Marriage hopes (1-5)                      | 4776     | 1.00 | 5.00  | 3.85     | .59       | 1772     | 1.00 | 5.00  | 3.84     | .58       | 3004     | 1.00 | 5.00  | 3.86     | .60       | .39                | .532     | .00                   |
| Marriage worries (1-5)                    | 4775     | 1.00 | 5.00  | 2.38     | .69       | 1771     | 1.00 | 5.00  | 2.55     | .69       | 3004     | 1.00 | 5.00  | 2.29     | .67       | 126.53             | .000     | .03                   |
| Quality of relationship with twin (1-5)   | 4680     | 1.00 | 5.00  | 3.93     | .90       | 1722     | 1.00 | 5.00  | 3.73     | .87       | 2958     | 1.00 | 5.00  | 4.04     | .90       | 179.85             | .000     | .04                   |
| Quality of relationship with mother (1-5) | 4646     | 1.00 | 5.00  | 3.83     | .96       | 1706     | 1.00 | 5.00  | 3.65     | .90       | 2940     | 1.00 | 5.00  | 3.93     | .97       | 52.03              | .000     | .01                   |
| Quality of relationship with father (1-5) | 4539     | 1.00 | 5.00  | 3.21     | 1.08      | 1658     | 1.00 | 5.00  | 3.24     | .99       | 2881     | 1.00 | 5.00  | 3.20     | 1.13      | .20                | .654     | .00                   |
| Number of relationships (0-4)             | 4776     | .00  | 4.00  | 1.21     | .79       | 1772     | .00  | 4.00  | 1.25     | .85       | 3004     | .00  | 4.00  | 1.18     | .75       | 2.47               | .116     | .00                   |
| Longest relationship (1-5)                | 4024     | 1.00 | 5.00  | 3.09     | 1.22      | 1479     | 1.00 | 5.00  | 2.86     | 1.21      | 2545     | 1.00 | 5.00  | 3.22     | 1.21      | 81.70              | .000     | .02                   |
| Partner violence (1-5)                    | 4618     | 1.00 | 5.00  | 1.77     | .97       | 1693     | 1.00 | 5.00  | 1.73     | .84       | 2925     | 1.00 | 5.00  | 1.79     | 1.03      | 1.39               | .239     | .00                   |
| Contact with mother (1-6)                 | 1960     | 1.00 | 6.00  | 3.19     | 1.20      | 676      | 1.00 | 6.00  | 2.94     | 1.09      | 1284     | 1.00 | 6.00  | 3.32     | 1.23      | 54.86              | .000     | .03                   |
| Communication with mother (0-6)           | 2007     | .00  | 6.00  | 4.67     | 1.19      | 690      | .00  | 6.00  | 4.30     | 1.12      | 1317     | .00  | 6.00  | 4.86     | 1.18      | 143.39             | .000     | .07                   |

|                                     |      |      |      |      |      |      |      |      |      |      |      |      |      |      |      |        |      |     |
|-------------------------------------|------|------|------|------|------|------|------|------|------|------|------|------|------|------|------|--------|------|-----|
| Communication with mother (1-6)     | 2121 | 1.00 | 6.00 | 3.02 | 1.18 | 728  | 1.00 | 6.00 | 2.92 | 1.14 | 1393 | 1.00 | 6.00 | 3.07 | 1.20 | 19.06  | .000 | .01 |
| Communication with father (0-6)     | 2328 | .00  | 6.00 | 3.70 | 1.55 | 788  | .00  | 6.00 | 3.62 | 1.43 | 1540 | .00  | 6.00 | 3.75 | 1.61 | 12.40  | .000 | .01 |
| Peer pressure (1-5)                 | 4725 | 1.00 | 4.86 | 1.97 | .71  | 1758 | 1.00 | 4.86 | 2.07 | .73  | 2967 | 1.00 | 4.86 | 1.91 | .70  | 7.32   | .000 | .01 |
| Physical peer victimisation (0-8)   | 4187 | .00  | 8.00 | .22  | .86  | 1503 | .00  | 8.00 | .39  | 1.14 | 2684 | .00  | 8.00 | .12  | .63  | 63.59  | .000 | .02 |
| Social peer victimisation (0-8)     | 4187 | .00  | 8.00 | .75  | 1.57 | 1503 | .00  | 8.00 | .72  | 1.52 | 2684 | .00  | 8.00 | .77  | 1.60 | 1.69   | .194 | .00 |
| Verbal peer victimisation (0-8)     | 4186 | .00  | 8.00 | 2.07 | 2.53 | 1502 | .00  | 8.00 | 2.49 | 2.73 | 2684 | .00  | 8.00 | 1.84 | 2.39 | 71.07  | .000 | .02 |
| Cyber peer victimisation (0-8)      | 4185 | .00  | 8.00 | .59  | 1.44 | 1503 | .00  | 8.00 | .57  | 1.44 | 2682 | .00  | 8.00 | .60  | 1.44 | 8.82   | .003 | .00 |
| Physical peer Perpetration (0-8)    | 4186 | .00  | 8.00 | .16  | .76  | 1503 | .00  | 8.00 | .31  | 1.07 | 2683 | .00  | 8.00 | .07  | .49  | 79.75  | .000 | .03 |
| Social peer Perpetration (0-8)      | 4184 | .00  | 8.00 | .42  | .88  | 1502 | .00  | 8.00 | .43  | .95  | 2682 | .00  | 8.00 | .42  | .83  | .88    | .349 | .00 |
| Verbal peer Perpetration (0-8)      | 4185 | .00  | 8.00 | 1.54 | 2.12 | 1503 | .00  | 8.00 | 2.08 | 2.49 | 2682 | .00  | 8.00 | 1.24 | 1.81 | 129.84 | .000 | .03 |
| Cyber peer Perpetration (0-8)       | 4185 | .00  | 8.00 | .27  | .92  | 1503 | .00  | 8.00 | .31  | 1.02 | 2682 | .00  | 8.00 | .25  | .85  | 1.17   | .280 | .00 |
| Parental role aspirations (1-5)     | 4328 | 1.00 | 5.00 | 4.16 | .77  | 1551 | 1.00 | 5.00 | 4.04 | .76  | 2777 | 1.00 | 5.00 | 4.23 | .76  | 62.14  | .000 | .01 |
| Occupational role aspirations (1-5) | 4331 | 1.00 | 5.00 | 3.95 | .61  | 1551 | 1.00 | 5.00 | 3.96 | .60  | 2780 | 1.00 | 5.00 | 3.94 | .61  | 2.21   | .137 | .00 |
| Homecare role aspirations (1-5)     | 4331 | 1.00 | 5.00 | 4.00 | .63  | 1551 | 1.00 | 5.00 | 3.91 | .65  | 2780 | 1.25 | 5.00 | 4.04 | .61  | 89.96  | .000 | .02 |

|                                            |      |      |       |       |      |      |      |       |       |      |      |      |       |       |      |        |      |     |
|--------------------------------------------|------|------|-------|-------|------|------|------|-------|-------|------|------|------|-------|-------|------|--------|------|-----|
| Importance of Relationships (0-20)         | 4822 | .00  | 2.00  | 15.92 | 3.56 | 1790 | .00  | 2.00  | 14.88 | 3.87 | 3032 | .00  | 2.00  | 16.53 | 3.21 | 301.17 | .000 | .06 |
| Achievement Motivation (0-16)              | 4821 | .00  | 16.00 | 1.19  | 2.91 | 1789 | .00  | 16.00 | 1.17  | 3.09 | 3032 | .00  | 16.00 | 1.21  | 2.80 | 2.27   | .132 | .00 |
| Purpose in Life (1-5)                      | 4819 | 1.00 | 5.00  | 3.47  | .82  | 1788 | 1.00 | 5.00  | 3.42  | .82  | 3031 | 1.00 | 5.00  | 3.49  | .81  | 26.79  | .000 | .01 |
| Importance of democracy and equality (1-5) | 4808 | 1.00 | 5.00  | 4.28  | .54  | 1785 | 1.00 | 5.00  | 4.19  | .56  | 3023 | 1.00 | 5.00  | 4.33  | .51  | 52.04  | .000 | .01 |
| Environmental concerns (1-5)               | 4815 | 1.00 | 5.00  | 3.70  | .70  | 1787 | 1.00 | 5.00  | 3.64  | .74  | 3028 | 1.17 | 5.00  | 3.73  | .67  | 1.06   | .303 | .00 |
| Religiosity (0-25)                         | 4730 | .00  | 25.00 | 4.36  | 4.96 | 1762 | .00  | 25.00 | 3.91  | 4.91 | 2968 | .00  | 25.00 | 4.64  | 4.97 | 23.80  | .000 | .00 |
| Importance of leisure (1-5)                | 4243 | 1.00 | 5.00  | 3.82  | .76  | 1518 | 1.00 | 5.00  | 3.93  | .71  | 2725 | 1.00 | 5.00  | 3.76  | .77  | 6.63   | .000 | .01 |
| Alcohol use (0-40)                         | 3899 | .00  | 37.00 | 8.05  | 5.06 | 1425 | .00  | 32.00 | 8.79  | 5.29 | 2474 | .00  | 37.00 | 7.61  | 4.88 | 35.78  | .000 | .01 |
| Ever smoked (0-1)                          | 4262 | .00  | 1.00  | .56   | .50  | 1528 | .00  | 1.00  | .57   | .50  | 2734 | .00  | 1.00  | .56   | .50  | .42    | .518 | .00 |
| Ever vaped (0-1)                           | 4259 | .00  | 1.00  | .25   | .44  | 1524 | .00  | 1.00  | .29   | .45  | 2735 | .00  | 1.00  | .24   | .43  | 24.64  | .000 | .01 |
| Cognitive enhancers (0-12)                 | 4217 | .00  | 12.00 | 1.19  | 1.96 | 1506 | .00  | 12.00 | 1.38  | 2.16 | 2711 | .00  | 12.00 | 1.08  | 1.83 | 32.00  | .000 | .01 |
| Big 5 Agreeableness (1-5)                  | 4674 | 1.00 | 5.00  | 3.72  | .57  | 1760 | 1.00 | 5.00  | 3.55  | .57  | 2914 | 1.00 | 5.00  | 3.82  | .55  | 246.80 | .000 | .05 |
| Big 5 Conscientiousness (1-5)              | 4666 | 1.00 | 5.00  | 3.88  | .62  | 1757 | 1.00 | 5.00  | 3.78  | .64  | 2909 | 1.00 | 5.00  | 3.94  | .60  | 78.99  | .000 | .02 |
| Big 5 Extraversion (1-5)                   | 4694 | 1.00 | 5.00  | 3.52  | .65  | 1772 | 1.00 | 5.00  | 3.45  | .68  | 2922 | 1.00 | 5.00  | 3.56  | .63  | 4.33   | .000 | .01 |
| Big 5 Neuroticism (1-5)                    | 4700 | 1.00 | 5.00  | 2.62  | .67  | 1774 | 1.00 | 5.00  | 2.48  | .66  | 2926 | 1.00 | 5.00  | 2.70  | .66  | 116.17 | .000 | .02 |
| Big 5 Openness (1-5)                       | 4688 | 1.00 | 5.00  | 3.40  | .62  | 1769 | 1.00 | 5.00  | 3.37  | .64  | 2919 | 1.00 | 5.00  | 3.42  | .61  | 7.29   | .007 | .00 |
| Self-control (0-24)                        | 4661 | .00  | 24.00 | 14.46 | 4.21 | 1753 | .00  | 24.00 | 13.86 | 4.30 | 2908 | .00  | 24.00 | 14.83 | 4.11 | 6.13   | .000 | .01 |

|                                                 |      |      |       |       |      |      |      |       |       |      |      |      |       |       |      |        |      |     |
|-------------------------------------------------|------|------|-------|-------|------|------|------|-------|-------|------|------|------|-------|-------|------|--------|------|-----|
| Not planning for the future (1-5)               | 4655 | 1.00 | 5.00  | 2.47  | .92  | 1749 | 1.00 | 5.00  | 2.58  | .92  | 2906 | 1.00 | 5.00  | 2.40  | .91  | 105.81 | .000 | .02 |
| Ambition (0-20)                                 | 4328 | 1.00 | 2.00  | 13.85 | 3.61 | 1553 | 1.00 | 2.00  | 14.00 | 3.67 | 2775 | 1.00 | 2.00  | 13.77 | 3.58 | .03    | .875 | .00 |
| Physical activity (1-5)                         | 4699 | 1.00 | 5.00  | 2.83  | 1.09 | 1733 | 1.00 | 5.00  | 2.96  | 1.10 | 2966 | 1.00 | 5.00  | 2.75  | 1.08 | 44.39  | .000 | .01 |
| Health behaviours (0-48)                        | 4721 | 2.00 | 48.00 | 25.24 | 6.67 | 1742 | 4.00 | 48.00 | 24.61 | 6.63 | 2979 | 2.00 | 47.00 | 25.61 | 6.66 | 13.75  | .000 | .00 |
| Risk taking behaviour (0-24)                    | 4651 | .00  | 24.00 | 6.49  | 3.61 | 1748 | .00  | 21.00 | 7.46  | 3.74 | 2903 | .00  | 24.00 | 5.91  | 3.40 | 244.01 | .000 | .05 |
| Risky sexual behaviour (0-16)                   | 4568 | .00  | 14.00 | 4.17  | 2.74 | 1706 | .00  | 12.33 | 3.92  | 2.71 | 2862 | .00  | 14.00 | 4.32  | 2.76 | 14.52  | .000 | .00 |
| Media use (0-20)                                | 4686 | .00  | 2.00  | 12.98 | 3.23 | 1732 | .00  | 2.00  | 12.04 | 3.66 | 2954 | .00  | 2.00  | 13.54 | 2.79 | 217.54 | .000 | .05 |
| Volunteering (0-20)                             | 4735 | .00  | 2.00  | 5.66  | 3.23 | 1763 | .00  | 18.00 | 5.52  | 3.32 | 2972 | .00  | 2.00  | 5.74  | 3.17 | 11.97  | .001 | .00 |
| Internet dating (scale) (0-5)                   | 4669 | .00  | 5.00  | 2.81  | 2.17 | 1726 | .00  | 5.00  | 3.09  | 2.09 | 2943 | .00  | 5.00  | 2.64  | 2.20 | 39.25  | .000 | .01 |
| Internet dating (y/n) (0-1)                     | 4689 | .00  | 1.00  | .47   | .50  | 1734 | .00  | 1.00  | .52   | .50  | 2955 | .00  | 1.00  | .44   | .50  | 21.50  | .000 | .00 |
| Financial literacy: Knowledge of Products (0-4) | 4612 | .00  | 4.00  | 1.39  | .70  | 1717 | .00  | 4.00  | 1.58  | .73  | 2895 | .00  | 4.00  | 1.28  | .65  | 182.00 | .000 | .04 |
| Financial attitudes and behaviour (1-5)         | 4610 | 1.00 | 5.00  | 3.55  | .62  | 1717 | 1.00 | 5.00  | 3.48  | .65  | 2893 | 1.00 | 5.00  | 3.59  | .61  | 34.52  | .000 | .01 |

Note. Raw uncorrected scores were used. These results are based on one twin randomly selected from each pair so that the data points are independent.

<sup>a</sup> *F* and *p* values are reported with Welch's correction (Welch, 1951) as the assumption of homogeneity of variance was violated for several variables.



**Table S5.** Descriptive statistics for psychological traits, for five sex and zygosity groups (repeated with the twin that was not randomly selected from each pair in the main analyses).

| Trait (possible range)                    | MZ males |          |           | DZ males |          |           | MZ females |          |           | DZ females |          |           | DZ opposite sex |          |           | ANOVA    |                  |                                     |
|-------------------------------------------|----------|----------|-----------|----------|----------|-----------|------------|----------|-----------|------------|----------|-----------|-----------------|----------|-----------|----------|------------------|-------------------------------------|
|                                           | <i>n</i> | <i>M</i> | <i>SD</i> | <i>n</i> | <i>M</i> | <i>SD</i> | <i>n</i>   | <i>M</i> | <i>SD</i> | <i>n</i>   | <i>M</i> | <i>SD</i> | <i>n</i>        | <i>M</i> | <i>SD</i> | Zygosity | Sex*<br>Zygosity | <i>R</i> <sup>2</sup><br>(adjusted) |
| Daily hassles (0-28)                      | 528      | 11.86    | 4.82      | 474      | 11.75    | 4.42      | 1058       | 12.82    | 4.82      | 912        | 12.97    | 4.71      | 1312            | 12.66    | 4.57      | .13      | .07              | .022 (.019)                         |
| CHAOS (0-12)                              | 594      | 3.66     | 1.99      | 543      | 3.89     | 2.20      | 1159       | 3.82     | 2.23      | 998        | 3.93     | 2.37      | 1514            | 3.86     | 2.19      | 5.66*    | .89              | .005 (.003)                         |
| Childhood experiences (0-32)              | 524      | 5.36     | 3.91      | 473      | 4.98     | 3.96      | 1058       | 5.57     | 5.02      | 910        | 5.50     | 4.83      | 1314            | 5.13     | 4.32      | 4.24*    | .29              | .004 (.001)                         |
| Poor sleep quality (0-24)                 | 512      | 4.23     | 3.70      | 463      | 3.92     | 3.50      | 1036       | 5.43     | 4.07      | 902        | 5.35     | 4.06      | 1286            | 4.91     | 3.72      | .42      | 2.87             | .049 (.047)                         |
| Marriage hopes (1-5)                      | 595      | 3.86     | .58       | 531      | 3.84     | .58       | 1145       | 3.86     | .58       | 971        | 3.82     | .61       | 1491            | 3.85     | .59       | 4.09*    | .72              | .004 (.001)                         |
| Marriage worries (1-5)                    | 594      | 2.51     | .71       | 531      | 2.55     | .70       | 1145       | 2.28     | .67       | 971        | 2.29     | .65       | 1491            | 2.41     | .69       | 4.09*    | .05              | .034 (.032)                         |
| Quality of relationship with twin (1-5)   | 578      | 4.03     | .84       | 520      | 3.56     | .86       | 1125       | 4.35     | .75       | 957        | 4.04     | .87       | 1457            | 3.62     | .89       | 67.88**  | .03              | .087 (.084)                         |
| Quality of relationship with mother (1-5) | 569      | 3.71     | .87       | 517      | 3.65     | .92       | 1118       | 3.89     | .98       | 951        | 3.92     | .99       | 1449            | 3.84     | .95       | 1.07     | 3.89*            | .038 (.036)                         |
| Quality of relationship with father (1-5) | 550      | 3.23     | 1.00      | 502      | 3.23     | .98       | 1095       | 3.18     | 1.14      | 929        | 3.21     | 1.13      | 1421            | 3.24     | 1.05      | .08      | .29              | .001 (-.002)                        |
| Number of relationships (0-4)             | 595      | 1.25     | .85       | 532      | 1.24     | .86       | 1145       | 1.18     | .74       | 971        | 1.18     | .77       | 1490            | 1.21     | .77       | 1.00     | 1.85             | .010 (.008)                         |
| Longest relationship (1-5)                | 495      | 2.88     | 1.21      | 439      | 2.92     | 1.23      | 970        | 3.22     | 1.25      | 816        | 3.26     | 1.18      | 1270            | 3.02     | 1.22      | 3.20     | .14              | .013 (.011)                         |
| Partner violence (1-5)                    | 563      | 1.76     | .88       | 511      | 1.70     | .86       | 1115       | 1.81     | 1.05      | 946        | 1.76     | 1.00      | 1442            | 1.76     | .94       | .65      | .71              | .005 (.002)                         |
| Contact with mother (1-6)                 | 230      | 2.90     | 1.03      | 214      | 2.99     | 1.10      | 502        | 3.27     | 1.23      | 428        | 3.34     | 1.24      | 579             | 3.20     | 1.22      | .52      | 1.11             | .018 (.015)                         |
| Communication with mother (0-6)           | 233      | 4.37     | 1.09      | 220      | 4.25     | 1.17      | 516        | 4.83     | 1.22      | 434        | 4.89     | 1.12      | 597             | 4.64     | 1.19      | .64      | .40              | .072 (.070)                         |
| Communication with mother (1-6)           | 246      | 2.80     | 1.09      | 225      | 3.00     | 1.10      | 545        | 3.07     | 1.25      | 450        | 3.09     | 1.19      | 645             | 3.01     | 1.17      | 4.01*    | .31              | .009 (.007)                         |
| Communication with father (0-6)           | 270      | 3.55     | 1.46      | 241      | 3.66     | 1.35      | 608        | 3.71     | 1.67      | 495        | 3.78     | 1.61      | 703             | 3.73     | 1.50      | 2.04     | .00              | .009 (.007)                         |
| Peer pressure (1-5)                       | 586      | 2.04     | .75       | 534      | 2.06     | .73       | 1120       | 1.88     | .68       | 963        | 1.91     | .68       | 1482            | 2.00     | .73       | 1.92     | .53              | .012 (.009)                         |
| Physical peer victimisation (0-8)         | 513      | .36      | 1.14      | 458      | .45      | 1.24      | 1026       | .12      | .67       | 885        | .13      | .62       | 1264            | .21      | .77       | .37      | .27              | .016 (.014)                         |
| Social peer victimisation (0-8)           | 513      | .65      | 1.40      | 458      | .78      | 1.62      | 1026       | .73      | 1.60      | 885        | .78      | 1.61      | 1264            | .78      | 1.55      | .50      | 1.95             | .007 (.004)                         |
| Verbal peer victimisation (0-8)           | 513      | 2.36     | 2.71      | 457      | 2.51     | 2.73      | 1025       | 1.72     | 2.34      | 886        | 1.78     | 2.36      | 1264            | 2.28     | 2.60      | .08      | 7.07*            | .019 (.016)                         |

|                                            |     |       |      |     |       |      |      |       |      |     |       |      |      |       |      |       |       |              |
|--------------------------------------------|-----|-------|------|-----|-------|------|------|-------|------|-----|-------|------|------|-------|------|-------|-------|--------------|
| Cyber peer victimisation (0-8)             | 513 | .49   | 1.36 | 458 | .63   | 1.51 | 1024 | .57   | 1.42 | 886 | .59   | 1.40 | 1263 | .63   | 1.51 | 1.09  | .55   | .003 (.000)  |
| Physical peer Perpetration (0-8)           | 513 | .30   | 1.09 | 458 | .36   | 1.15 | 1025 | .06   | .45  | 886 | .06   | .46  | 1263 | .17   | .75  | .36   | .68   | .020 (.017)  |
| Social peer Perpetration (0-8)             | 512 | .41   | .89  | 458 | .45   | .96  | 1024 | .40   | .80  | 886 | .40   | .79  | 1263 | .44   | .94  | .55   | .81   | .002 (.000)  |
| Verbal peer Perpetration (0-8)             | 513 | 1.97  | 2.53 | 458 | 2.10  | 2.41 | 1024 | 1.17  | 1.77 | 886 | 1.15  | 1.71 | 1263 | 1.75  | 2.24 | .45   | 1.98  | .027 (.024)  |
| Cyber peer Perpetration (0-8)              | 513 | .29   | 1.01 | 458 | .27   | .88  | 1024 | .25   | .82  | 886 | .23   | .80  | 1263 | .32   | 1.04 | 1.04  | .11   | .001 (-.002) |
| Parental role aspirations (1-5)            | 525 | 4.04  | .76  | 473 | 4.03  | .79  | 1058 | 4.24  | .76  | 911 | 4.21  | .80  | 1317 | 4.16  | .73  | .01   | .08   | .008 (.005)  |
| Occupational role aspirations (1-5)        | 525 | 3.95  | .63  | 473 | 3.94  | .60  | 1059 | 3.93  | .63  | 912 | 3.97  | .60  | 1318 | 3.94  | .59  | .04   | .10   | .008 (.006)  |
| Homecare role aspirations (1-5)            | 525 | 3.93  | .67  | 473 | 3.88  | .63  | 1059 | 4.05  | .62  | 912 | 4.04  | .62  | 1318 | 3.99  | .62  | .32   | .59   | .004 (.002)  |
| Importance of Relationships (0-20)         | 605 | 15.10 | 3.77 | 536 | 14.83 | 3.84 | 1146 | 16.43 | 3.22 | 980 | 16.60 | 3.17 | 1510 | 15.80 | 3.67 | 3.95* | 4.36* | .066 (.064)  |
| Achievement Motivation (0-16)              | 605 | 1.26  | 3.02 | 536 | 1.18  | 3.01 | 1146 | 1.24  | 2.79 | 980 | 1.19  | 2.77 | 1509 | 1.15  | 3.01 | .58   | .53   | .006 (.003)  |
| Purpose in Life (1-5)                      | 605 | 3.45  | .82  | 536 | 3.42  | .81  | 1146 | 3.52  | .79  | 979 | 3.48  | .83  | 1508 | 3.44  | .83  | .01   | .12   | .000 (-.002) |
| Importance of democracy and equality (1-5) | 605 | 4.15  | .59  | 534 | 4.19  | .55  | 1143 | 4.33  | .51  | 976 | 4.33  | .53  | 1506 | 4.28  | .52  | .21   | .51   | .028 (.025)  |
| Environmental concerns (1-5)               | 606 | 3.61  | .75  | 535 | 3.64  | .73  | 1143 | 3.71  | .66  | 978 | 3.74  | .67  | 1508 | 3.71  | .71  | .23   | .47   | .003 (.000)  |
| Religiosity (0-25)                         | 589 | 4.11  | 4.98 | 534 | 3.99  | 4.94 | 1121 | 4.87  | 5.18 | 964 | 4.45  | 4.83 | 1482 | 4.13  | 4.82 | 4.57* | .29   | .008 (.005)  |
| Importance of leisure (1-5)                | 515 | 3.94  | .70  | 463 | 3.93  | .74  | 1035 | 3.76  | .77  | 902 | 3.77  | .78  | 1287 | 3.84  | .74  | .63   | .57   | .014 (.011)  |
| Alcohol use (0-40)                         | 483 | 8.46  | 5.21 | 433 | 8.95  | 5.31 | 953  | 7.38  | 4.66 | 814 | 7.55  | 4.83 | 1176 | 8.45  | 5.22 | .75   | .56   | .026 (.023)  |
| Ever smoked (0-1)                          | 521 | .54   | .50  | 467 | .57   | .50  | 1048 | .54   | .50  | 894 | .54   | .50  | 1292 | .59   | .49  | .06   | .65   | .001 (-.002) |
| Ever vaped (0-1)                           | 521 | .28   | .45  | 464 | .30   | .46  | 1047 | .24   | .43  | 895 | .23   | .42  | 1291 | .25   | .43  | .02   | .03   | .001 (-.002) |
| Cognitive enhancers (0-12)                 | 515 | 1.28  | 2.13 | 461 | 1.53  | 2.21 | 1037 | 1.01  | 1.73 | 887 | 1.06  | 1.82 | 1276 | 1.26  | 2.04 | 2.27  | .33   | .004 (.001)  |
| Big 5 Agreeableness (1-5)                  | 590 | 3.56  | .57  | 527 | 3.57  | .58  | 1087 | 3.85  | .52  | 936 | 3.80  | .57  | 1488 | 3.69  | .58  | .06   | .32   | .075 (.072)  |

|                                                 |     |       |      |     |       |      |      |       |      |     |       |      |      |       |      |      |       |              |
|-------------------------------------------------|-----|-------|------|-----|-------|------|------|-------|------|-----|-------|------|------|-------|------|------|-------|--------------|
| Big 5 Conscientiousness (1-5)                   | 588 | 3.80  | .65  | 527 | 3.80  | .61  | 1086 | 3.97  | .57  | 933 | 3.91  | .63  | 1487 | 3.86  | .62  | .72  | .04   | .009 (.006)  |
| Big 5 Extraversion (1-5)                        | 592 | 3.45  | .68  | 537 | 3.45  | .68  | 1087 | 3.55  | .64  | 942 | 3.56  | .63  | 1490 | 3.51  | .66  | 1.12 | 4.63* | .014 (.011)  |
| Big 5 Neuroticism (1-5)                         | 592 | 2.50  | .67  | 539 | 2.46  | .68  | 1089 | 2.69  | .67  | 943 | 2.69  | .68  | 1491 | 2.61  | .64  | .61  | .03   | .031 (.028)  |
| Big 5 Openness (1-5)                            | 592 | 3.38  | .66  | 534 | 3.38  | .61  | 1087 | 3.40  | .60  | 940 | 3.41  | .62  | 1489 | 3.41  | .62  | .16  | 5.12* | .006 (.003)  |
| Self-control (0-24)                             | 588 | 13.93 | 4.26 | 524 | 14.17 | 4.33 | 1086 | 14.95 | 4.08 | 933 | 14.72 | 4.10 | 1485 | 14.32 | 4.25 | 2.54 | .04   | .006 (.004)  |
| Not planning for the future (1-5)               | 587 | 2.56  | .91  | 523 | 2.58  | .91  | 1086 | 2.39  | .89  | 932 | 2.44  | .92  | 1482 | 2.46  | .93  | .18  | .77   | .005 (.002)  |
| Ambition (0-20)                                 | 528 | 14.08 | 3.72 | 474 | 13.88 | 3.57 | 1058 | 13.80 | 3.57 | 913 | 13.77 | 3.63 | 1312 | 13.86 | 3.62 | 2.66 | 1.45  | .010 (.007)  |
| Physical activity (1-5)                         | 583 | 2.94  | 1.13 | 523 | 2.92  | 1.08 | 1131 | 2.73  | 1.08 | 958 | 2.75  | 1.09 | 1461 | 2.87  | 1.09 | .03  | .85   | .009 (.006)  |
| Health behaviours (0-48)                        | 587 | 24.71 | 6.56 | 525 | 24.50 | 6.83 | 1133 | 25.48 | 6.61 | 964 | 25.48 | 6.74 | 1469 | 25.37 | 6.63 | 1.66 | .00   | .005 (.002)  |
| Risk taking behaviour (0-24)                    | 585 | 7.39  | 3.97 | 525 | 7.43  | 3.47 | 1085 | 5.82  | 3.39 | 933 | 5.93  | 3.41 | 1478 | 6.64  | 3.61 | 2.44 | .17   | .049 (.046)  |
| Risky sexual behaviour (0-16)                   | 573 | 3.98  | 2.79 | 513 | 3.88  | 2.65 | 1090 | 4.27  | 2.78 | 932 | 4.30  | 2.76 | 1419 | 4.20  | 2.71 | .04  | 2.59  | .010 (.008)  |
| Media use (0-20)                                | 584 | 12.10 | 3.63 | 523 | 11.87 | 3.62 | 1125 | 13.42 | 2.75 | 953 | 13.58 | 2.87 | 1458 | 13.01 | 3.27 | .93  | .68   | .048 (.045)  |
| Volunteering (0-20)                             | 589 | 5.43  | 3.30 | 534 | 5.45  | 3.40 | 1123 | 5.71  | 3.21 | 964 | 5.70  | 3.16 | 1485 | 5.76  | 3.19 | .03  | .55   | .001 (-.002) |
| Internet dating (scale) (0-5)                   | 582 | 3.08  | 2.10 | 522 | 3.02  | 2.13 | 1121 | 2.47  | 2.17 | 950 | 2.60  | 2.21 | 1451 | 2.99  | 2.14 | 3.12 | 1.72  | .013 (.010)  |
| Internet dating (y/n) (0-1)                     | 586 | .52   | .50  | 524 | .51   | .50  | 1124 | .40   | .49  | 954 | .44   | .50  | 1458 | .50   | .50  | 2.29 | 2.40  | .011 (.008)  |
| Financial literacy: Knowledge of Products (0-4) | 586 | 1.56  | .75  | 516 | 1.57  | .71  | 1106 | 1.30  | .64  | 931 | 1.28  | .68  | 1430 | 1.42  | .69  | .00  | .52   | .067 (.064)  |
| Financial attitudes and behaviour (1-5)         | 586 | 3.49  | .64  | 516 | 3.49  | .65  | 1105 | 3.63  | .59  | 931 | 3.59  | .60  | 1430 | 3.52  | .64  | .04  | .89   | .009 (.006)  |

Note. MZ=monozygotic; DZ=dizygotic. Raw uncorrected scores were used. These results are based on one twin randomly selected from each pair so that the data points are independent.

Group difference = *F* statistics; \*\**p* < .05. \*\*\**p* < .001.

**Table S6.** Phenotypic correlations between psychological traits and composite scores of adverse physical and adverse mental health, wellbeing and educational attainment, for the whole sample (a) and then separately for males (b) and females (c) (95% confidence intervals are in parentheses).

| (a)                                 |                     |          |          |                       |          |          |                         |          |          |                            |          |          |                           |          |          |
|-------------------------------------|---------------------|----------|----------|-----------------------|----------|----------|-------------------------|----------|----------|----------------------------|----------|----------|---------------------------|----------|----------|
| Trait                               | Wellbeing           |          |          | Adverse mental health |          |          | Adverse physical health |          |          | Achieved educational level |          |          | Planned educational level |          |          |
|                                     | <i>r</i>            | <i>p</i> | <i>n</i> | <i>r</i>              | <i>p</i> | <i>n</i> | <i>r</i>                | <i>p</i> | <i>n</i> | <i>r</i>                   | <i>p</i> | <i>n</i> | <i>r</i>                  | <i>p</i> | <i>n</i> |
| Daily hassles                       | -.29<br>(-.31,-.26) | <.001    | 3890     | .52<br>(.49,.54)      | <.001    | 3607     | .28<br>(.25,.31)        | <.001    | 3877     | .01<br>(-.02,.04)          | .573     | 3965     | -.01<br>(-.05,.03)        | .510     | 2656     |
| CHAOS                               | -.29<br>(-.33,-.27) | <.001    | 4625     | .32<br>(.29,.35)      | <.001    | 3609     | .22<br>(.18,.24)        | <.001    | 3879     | -.09<br>(-.12,-.06)        | <.001    | 4728     | -.08<br>(-.11,-.04)       | <.001    | 3121     |
| Childhood experiences               | -.24<br>(-.27,-.21) | <.001    | 3885     | .35<br>(.32,.37)      | <.001    | 3591     | .22<br>(.19,.25)        | <.001    | 3854     | -.04<br>(-.07,-.01)        | .007     | 3959     | -.06<br>(-.10,-.02)       | .002     | 2654     |
| Poor sleep quality                  | -.23<br>(-.26,-.20) | <.001    | 3832     | .50<br>(.47,.52)      | <.001    | 3590     | .38<br>(.35,.41)        | <.001    | 3875     | -.04<br>(-.07,-.01)        | .019     | 3908     | -.03<br>(-.07,.01)        | .160     | 2615     |
| Marriage hopes                      | .14<br>(.11,.17)    | <.001    | 4625     | -.08<br>(-.11,-.05)   | <.001    | 3610     | -.05<br>(-.08,-.02)     | .002     | 3879     | .10<br>(.07,.13)           | <.001    | 4727     | .05<br>(.02,.09)          | .005     | 3121     |
| Marriage worries                    | -.28<br>(-.31,-.25) | <.001    | 4626     | .22<br>(.18,.25)      | <.001    | 3611     | .12<br>(.09,.15)        | <.001    | 3880     | -.03<br>(-.06,.00)         | .044     | 4728     | -.05<br>(-.08,-.01)       | .013     | 3121     |
| Quality of relationship with twin   | .18<br>(.15,.21)    | <.001    | 4555     | -.18<br>(-.21,-.14)   | <.001    | 3571     | -.09<br>(-.12,-.06)     | <.001    | 3832     | .03<br>(.00,.06)           | .035     | 4658     | .00<br>(-.03,.04)         | .904     | 3080     |
| Quality of relationship with mother | .21<br>(.18,.24)    | <.001    | 4510     | -.22<br>(-.25,-.18)   | <.001    | 3538     | -.08<br>(-.11,-.05)     | <.001    | 3794     | .00<br>(-.03,.03)          | .830     | 4612     | .00<br>(-.04,.03)         | .872     | 3048     |
| Quality of relationship with father | .25<br>(.22,.27)    | <.001    | 4401     | -.26<br>(-.29,-.23)   | <.001    | 3465     | -.14<br>(-.17,-.11)     | <.001    | 3719     | .04<br>(.01,.07)           | .005     | 4497     | .01<br>(-.03,.04)         | .726     | 2969     |
| Number of relationships             | .06<br>(.04,.09)    | <.001    | 4623     | .11<br>(.07,.14)      | <.001    | 3608     | .16<br>(.13,.19)        | <.001    | 3877     | -.07<br>(-.09,-.04)        | <.001    | 4726     | -.06<br>(-.10,-.03)       | .001     | 3119     |
| Longest relationship                | .17<br>(.14,.20)    | <.001    | 3881     | -.02<br>(-.06,.01)    | .205     | 3005     | .00<br>(-.03,.04)       | .859     | 3232     | -.07<br>(-.10,-.03)        | <.001    | 3963     | -.04<br>(-.08,.00)        | .061     | 2602     |
| Partner violence                    | -.21<br>(-.24,-.18) | <.001    | 4476     | .32<br>(.29,.35)      | <.001    | 3496     | .22<br>(.19,.25)        | <.001    | 3758     | -.10<br>(-.12,-.07)        | <.001    | 4573     | -.07<br>(-.10,-.03)       | <.001    | 3034     |
| Contact with mother                 | .10<br>(.05,.14)    | <.001    | 1798     | -.02<br>(-.07,.03)    | .372     | 1669     | .03<br>(-.02,.07)       | .271     | 1772     | -.25<br>(-.29,-.20)        | <.001    | 1817     | -.19<br>(-.24,-.14)       | <.001    | 1263     |
| Communication with mother           | .10<br>(.05,.14)    | <.001    | 1831     | -.09<br>(-.14,-.05)   | <.001    | 1698     | -.04<br>(-.08,.01)      | .138     | 1803     | -.04<br>(-.09,.00)         | .066     | 1849     | -.03<br>(-.08,.03)        | .302     | 1283     |

|                                      |                     |       |      |                     |       |      |                     |       |      |                     |       |      |                     |       |      |
|--------------------------------------|---------------------|-------|------|---------------------|-------|------|---------------------|-------|------|---------------------|-------|------|---------------------|-------|------|
| Contact with father                  | .10<br>(.06,.14)    | <.001 | 1957 | -.08<br>(-.13,-.04) | <.001 | 1819 | -.01<br>(-.06,.03)  | .614  | 1934 | -.14<br>(-.18,-.09) | <.001 | 1980 | -.15<br>(-.20,-.10) | <.001 | 1340 |
| Communication with father            | .13<br>(.09,.18)    | <.001 | 2138 | -.16<br>(-.20,-.11) | <.001 | 1977 | -.09<br>(-.13,-.04) | <.001 | 2107 | .05<br>(.01,.09)    | .024  | 2164 | .02<br>(-.03,.07)   | .416  | 1471 |
| Peer pressure                        | -.20<br>(-.23,-.17) | <.001 | 4537 | .27<br>(.23,.30)    | <.001 | 3608 | .15<br>(.11,.18)    | <.001 | 3820 | .02<br>(.00,.05)    | .102  | 4642 | -.02<br>(-.05,.02)  | .338  | 3067 |
| Physical peer victimisation          | -.09<br>(-.13,-.06) | <.001 | 3781 | .16<br>(.12,.19)    | <.001 | 3535 | .11<br>(.08,.15)    | <.001 | 3792 | -.04<br>(-.07,.00)  | .028  | 3852 | -.03<br>(-.07,.01)  | .114  | 2584 |
| Social peer victimisation            | -.19<br>(-.22,-.16) | <.001 | 3780 | .39<br>(.37,.42)    | <.001 | 3534 | .21<br>(.18,.24)    | <.001 | 3791 | -.03<br>(-.06,.00)  | .084  | 3851 | -.05<br>(-.09,-.01) | .013  | 2584 |
| Verbal peer victimisation            | -.18<br>(-.21,-.15) | <.001 | 3780 | .38<br>(.35,.41)    | <.001 | 3534 | .22<br>(.18,.25)    | <.001 | 3791 | .00<br>(-.03,.03)   | .870  | 3851 | .00<br>(-.04,.04)   | .876  | 2583 |
| Cyber peer victimisation             | -.17<br>(-.20,-.13) | <.001 | 3780 | .35<br>(.32,.38)    | <.001 | 3534 | .23<br>(.20,.26)    | <.001 | 3791 | -.05<br>(-.08,-.01) | .005  | 3851 | -.07<br>(-.11,-.03) | .001  | 2583 |
| Physical peer Perpetration           | -.06<br>(-.09,-.02) | .001  | 3781 | .12<br>(.08,.15)    | <.001 | 3537 | .08<br>(.05,.11)    | <.001 | 3793 | -.07<br>(-.10,-.04) | <.001 | 3852 | -.10<br>(-.14,-.06) | <.001 | 2584 |
| Social peer Perpetration             | -.16<br>(-.19,-.13) | <.001 | 3781 | .30<br>(.26,.32)    | <.001 | 3537 | .15<br>(.12,.18)    | <.001 | 3793 | -.06<br>(-.09,-.03) | <.001 | 3852 | -.06<br>(-.10,-.03) | .001  | 2584 |
| Verbal peer Perpetration             | -.10<br>(-.14,-.07) | <.001 | 3781 | .22<br>(.19,.25)    | <.001 | 3537 | .13<br>(.10,.16)    | <.001 | 3793 | -.02<br>(-.05,.01)  | .285  | 3852 | -.02<br>(-.06,.01)  | .226  | 2584 |
| Cyber peer Perpetration              | -.09<br>(-.12,-.06) | <.001 | 3781 | .19<br>(.16,.22)    | <.001 | 3537 | .14<br>(.11,.17)    | <.001 | 3793 | -.05<br>(-.08,-.02) | .003  | 3852 | -.08<br>(-.11,-.04) | <.001 | 2584 |
| Parental role aspirations            | .15<br>(.12,.18)    | <.001 | 3897 | -.14<br>(-.17,-.10) | <.001 | 3598 | -.04<br>(-.07,-.01) | .009  | 3861 | -.05<br>(-.08,-.01) | .004  | 3970 | -.02<br>(-.06,.02)  | .294  | 2661 |
| Occupational role aspirations        | .02<br>(-.01,.05)   | .223  | 3897 | -.05<br>(-.08,-.02) | .004  | 3598 | -.03<br>(-.06,.00)  | .046  | 3861 | .12<br>(.09,.15)    | <.001 | 3970 | .07<br>(.04,.11)    | <.001 | 2661 |
| Homecare role aspirations            | .19<br>(.16,.22)    | <.001 | 3897 | -.09<br>(-.12,-.06) | <.001 | 3598 | -.04<br>(-.07,-.01) | .011  | 3861 | -.05<br>(-.08,-.02) | .002  | 3970 | -.05<br>(-.09,-.01) | .011  | 2661 |
| Importance of Relationships          | .18<br>(.15,.20)    | <.001 | 4577 | -.10<br>(-.13,-.07) | <.001 | 3590 | -.01<br>(-.04,.02)  | .549  | 3841 | .04<br>(.01,.07)    | .004  | 4681 | .02<br>(-.02,.05)   | .417  | 3094 |
| Achievement Motivation               | .09<br>(.06,.12)    | <.001 | 4577 | -.04<br>(-.08,-.01) | .010  | 3590 | -.01<br>(-.04,.02)  | .470  | 3841 | .05<br>(.02,.07)    | .002  | 4681 | .04<br>(.00,.07)    | .033  | 3094 |
| Purpose in Life                      | .44<br>(.41,.46)    | <.001 | 4576 | -.56<br>(-.58,-.54) | <.001 | 3590 | -.23<br>(-.26,-.20) | <.001 | 3841 | .06<br>(.03,.09)    | <.001 | 4680 | .08<br>(.05,.12)    | <.001 | 3094 |
| Importance of democracy and equality | -.02<br>(-.05,.01)  | .205  | 4580 | .05<br>(.01,.08)    | .007  | 3587 | .00<br>(-.03,.03)   | .988  | 3841 | .16<br>(.13,.18)    | <.001 | 4684 | .11<br>(.08,.15)    | <.001 | 3096 |

|                             |                     |       |      |                     |       |      |                     |       |      |                     |       |      |                     |       |      |
|-----------------------------|---------------------|-------|------|---------------------|-------|------|---------------------|-------|------|---------------------|-------|------|---------------------|-------|------|
| Environmental concerns      | -.01<br>(-.04,.02)  | .514  | 4581 | -.02<br>(-.05,.02)  | .322  | 3588 | -.07<br>(-.10,-.04) | <.001 | 3842 | .18<br>(.16,.21)    | <.001 | 4685 | .19<br>(.15,.22)    | <.001 | 3096 |
| Religiosity                 | .02<br>(-.01,.05)   | .212  | 4543 | .03<br>(.00,.06)    | .095  | 3610 | .02<br>(-.01,.05)   | .229  | 3823 | .06<br>(.03,.09)    | <.001 | 4647 | .07<br>(.03,.10)    | <.001 | 3068 |
| Importance of leisure       | .32<br>(.29,.35)    | <.001 | 3830 | -.40<br>(-.43,-.37) | <.001 | 3610 | -.22<br>(-.25,-.19) | <.001 | 3857 | .11<br>(.08,.14)    | <.001 | 3905 | .10<br>(.06,.14)    | <.001 | 2614 |
| Alcohol use                 | -.11<br>(-.14,-.07) | <.001 | 3516 | .14<br>(.11,.18)    | <.001 | 3283 | .10<br>(.07,.14)    | <.001 | 3517 | .03<br>(.00,.06)    | .059  | 3580 | .03<br>(-.01,.06)   | .211  | 2430 |
| Ever smoked                 | -.09<br>(-.12,-.06) | <.001 | 3834 | .12<br>(.08,.15)    | <.001 | 3574 | .10<br>(.07,.13)    | <.001 | 3837 | -.07<br>(-.10,-.04) | <.001 | 3906 | -.06<br>(-.10,-.02) | .002  | 2622 |
| Ever vaped                  | -.10<br>(-.13,-.06) | <.001 | 3835 | .16<br>(.12,.19)    | <.001 | 3577 | .17<br>(.13,.20)    | <.001 | 3837 | -.14<br>(-.17,-.10) | <.001 | 3907 | -.11<br>(-.15,-.08) | <.001 | 2624 |
| Cognitive enhancers         | -.15<br>(-.18,-.12) | <.001 | 3809 | .23<br>(.20,.26)    | <.001 | 3550 | .14<br>(.11,.17)    | <.001 | 3816 | .00<br>(-.03,.03)   | .899  | 3877 | .02<br>(-.02,.06)   | .280  | 2609 |
| Big 5 Agreeableness         | .10<br>(.07,.13)    | <.001 | 4360 | -.10<br>(-.14,-.07) | <.001 | 3608 | -.07<br>(-.10,-.03) | <.001 | 3665 | .02<br>(-.01,.05)   | .188  | 4449 | .01<br>(-.03,.05)   | .547  | 2961 |
| Big 5 Conscientiousness     | .26<br>(.23,.29)    | <.001 | 4361 | -.29<br>(-.32,-.26) | <.001 | 3608 | -.16<br>(-.19,-.13) | <.001 | 3665 | .09<br>(.06,.12)    | <.001 | 4450 | .08<br>(.04,.11)    | <.001 | 2961 |
| Big 5 Extraversion          | .27<br>(.25,.30)    | <.001 | 4360 | -.41<br>(-.44,-.39) | <.001 | 3608 | -.16<br>(-.19,-.13) | <.001 | 3665 | .07<br>(.04,.10)    | <.001 | 4449 | .03<br>(-.01,.07)   | .101  | 2961 |
| Big 5 Neuroticism           | -.36<br>(-.38,-.33) | <.001 | 4361 | .65<br>(.63,.67)    | <.001 | 3608 | .30<br>(.27,.33)    | <.001 | 3665 | -.04<br>(-.06,-.01) | .020  | 4450 | -.03<br>(-.07,.00)  | .067  | 2961 |
| Big 5 Openness              | -.14<br>(-.17,-.11) | <.001 | 4360 | .13<br>(.09,.16)    | <.001 | 3608 | .04<br>(.01,.07)    | .012  | 3665 | .07<br>(.04,.10)    | <.001 | 4449 | .02<br>(-.02,.05)   | .358  | 2961 |
| Self-control                | .28<br>(.25,.31)    | <.001 | 4361 | -.45<br>(-.48,-.43) | <.001 | 3608 | -.25<br>(-.28,-.22) | <.001 | 3665 | .07<br>(.04,.10)    | <.001 | 4450 | .07<br>(.03,.10)    | <.001 | 2961 |
| Not planning for the future | -.16<br>(-.19,-.13) | <.001 | 4361 | .17<br>(.14,.20)    | <.001 | 3608 | .08<br>(.05,.12)    | <.001 | 3665 | -.10<br>(-.13,-.07) | <.001 | 4450 | -.11<br>(-.15,-.08) | <.001 | 2961 |
| Ambition                    | .14<br>(.11,.17)    | <.001 | 3890 | -.15<br>(-.18,-.12) | <.001 | 3607 | -.07<br>(-.10,-.04) | <.001 | 3877 | .11<br>(.08,.14)    | <.001 | 3965 | .09<br>(.06,.13)    | <.001 | 2656 |
| Physical activity           | .15<br>(.12,.18)    | <.001 | 4616 | -.15<br>(-.18,-.11) | <.001 | 3606 | -.14<br>(-.17,-.11) | <.001 | 3874 | .10<br>(.07,.13)    | <.001 | 4720 | .07<br>(.04,.11)    | <.001 | 3118 |
| Health behaviours           | .11<br>(.08,.14)    | <.001 | 4623 | -.19<br>(-.22,-.16) | <.001 | 3610 | -.15<br>(-.18,-.11) | <.001 | 3881 | .17<br>(.14,.19)    | <.001 | 4728 | .15<br>(.12,.19)    | <.001 | 3122 |
| Risk taking behaviour       | -.12<br>(-.15,-.09) | <.001 | 4363 | .12<br>(.09,.15)    | <.001 | 3611 | .14<br>(.11,.17)    | <.001 | 3665 | .01<br>(-.02,.04)   | .429  | 4452 | -.01<br>(-.05,.02)  | .460  | 2958 |
| Risky sexual behaviour      | .06<br>(.03,.09)    | <.001 | 4386 | .04<br>(.01,.08)    | .010  | 3445 | .10<br>(.06,.13)    | <.001 | 3690 | -.08<br>(-.11,-.05) | <.001 | 4487 | -.05<br>(-.09,-.02) | .004  | 2970 |

|                                                 |                     |       |      |                     |       |      |                     |       |      |                   |       |      |                    |       |      |
|-------------------------------------------------|---------------------|-------|------|---------------------|-------|------|---------------------|-------|------|-------------------|-------|------|--------------------|-------|------|
| Media use                                       | .00<br>(-.03,.03)   | .925  | 4605 | .04<br>(.00,.07)    | .025  | 3587 | .08<br>(.05,.11)    | <.001 | 3851 | .00<br>(-.03,.03) | .982  | 4696 | -.01<br>(-.04,.03) | .684  | 3105 |
| Volunteering                                    | .06<br>(.04,.09)    | <.001 | 4543 | .03<br>(.00,.07)    | .048  | 3611 | .09<br>(.06,.12)    | <.001 | 3825 | .11<br>(.08,.13)  | <.001 | 4647 | .09<br>(.05,.12)   | <.001 | 3070 |
| Internet dating<br>(scale)                      | -.18<br>(-.21,-.15) | <.001 | 4587 | .11<br>(.07,.14)    | <.001 | 3578 | .09<br>(.06,.13)    | <.001 | 3844 | .08<br>(.06,.11)  | <.001 | 4683 | .03<br>(-.01,.06)  | .121  | 3102 |
| Internet dating<br>(y/n)                        | -.15<br>(-.18,-.12) | <.001 | 4597 | .10<br>(.07,.14)    | <.001 | 3586 | .10<br>(.07,.13)    | <.001 | 3852 | .07<br>(.04,.10)  | <.001 | 4694 | .02<br>(-.02,.05)  | .301  | 3105 |
| Financial literacy:<br>Knowledge of<br>Products | .22<br>(.20,.25)    | <.001 | 4626 | -.14<br>(-.17,-.11) | <.001 | 3535 | -.04<br>(-.07,-.01) | .017  | 3789 | .02<br>(-.01,.05) | .239  | 4616 | .01<br>(-.02,.05)  | .548  | 3059 |
| Financial attitudes<br>and behaviour            | .32<br>(.29,.34)    | <.001 | 4625 | -.19<br>(-.22,-.16) | <.001 | 3534 | -.14<br>(-.18,-.11) | <.001 | 3788 | .07<br>(.04,.09)  | <.001 | 4615 | .06<br>(.02,.09)   | .002  | 3058 |

(b)

Males

| Trait                                     | Wellbeing           |          |          | Adverse mental health |          |          | Adverse physical health |          |          | Achieved educational level |          |          | Planned educational level |          |          |
|-------------------------------------------|---------------------|----------|----------|-----------------------|----------|----------|-------------------------|----------|----------|----------------------------|----------|----------|---------------------------|----------|----------|
|                                           | <i>r</i>            | <i>p</i> | <i>n</i> | <i>r</i>              | <i>p</i> | <i>n</i> | <i>r</i>                | <i>p</i> | <i>n</i> | <i>r</i>                   | <i>p</i> | <i>n</i> | <i>r</i>                  | <i>p</i> | <i>n</i> |
| Daily hassles                             | -.29<br>(-.34,-.25) | <.001    | 1424     | .51<br>(.47,.55)      | <.001    | 1312     | .28<br>(.23,.32)        | <.001    | 1395     | -.02<br>(-.07,.03)         | .563     | 1439     | -.06<br>(-.12,.00)        | .050     | 939      |
| CHAOS                                     | -.26<br>(-.30,-.21) | <.001    | 1774     | .28<br>(.23,.33)      | <.001    | 1312     | .17<br>(.12,.22)        | <.001    | 1395     | -.11<br>(-.16,-.06)        | <.001    | 1798     | -.08<br>(-.14,-.02)       | .006     | 1149     |
| Childhood<br>experiences                  | -.22<br>(-.27,-.17) | <.001    | 1418     | .32<br>(.27,.37)      | <.001    | 1305     | .17<br>(.12,.22)        | <.001    | 1383     | -.07<br>(-.12,-.02)        | .013     | 1434     | -.10<br>(-.16,-.04)       | .003     | 936      |
| Poor sleep quality                        | -.22<br>(-.27,-.17) | <.001    | 1401     | .45<br>(.40,.49)      | <.001    | 1303     | .32<br>(.28,.37)        | <.001    | 1394     | -.05<br>(-.10,.00)         | .083     | 1416     | -.06<br>(-.12,.00)        | .075     | 924      |
| Marriage hopes                            | .12<br>(.08,.17)    | <.001    | 1774     | -.08<br>(-.14,-.03)   | .003     | 1312     | -.02<br>(-.07,.04)      | .576     | 1395     | .11<br>(.06,.16)           | <.001    | 1798     | .02<br>(-.04,.08)         | .442     | 1149     |
| Marriage worries                          | -.20<br>(-.24,-.15) | <.001    | 1774     | .16<br>(.10,.21)      | <.001    | 1312     | .05<br>(.00,.11)        | .047     | 1395     | -.02<br>(-.07,.03)         | .375     | 1798     | -.06<br>(-.12,.00)        | .044     | 1149     |
| Quality of<br>relationship with<br>twin   | .16<br>(.11,.20)    | <.001    | 1740     | -.09<br>(-.14,-.03)   | .001     | 1297     | -.08<br>(-.13,-.03)     | .003     | 1373     | .03<br>(-.02,.08)          | .173     | 1764     | -.03<br>(-.09,.03)        | .364     | 1129     |
| Quality of<br>relationship with<br>mother | .17<br>(.12,.22)    | <.001    | 1722     | -.13<br>(-.19,-.08)   | <.001    | 1282     | -.09<br>(-.14,-.03)     | .002     | 1357     | .03<br>(-.02,.08)          | .236     | 1746     | -.03<br>(-.09,.03)        | .369     | 1116     |
| Quality of<br>relationship with<br>father | .27<br>(.23,.31)    | <.001    | 1676     | -.25<br>(-.30,-.20)   | <.001    | 1257     | -.14<br>(-.19,-.09)     | <.001    | 1330     | .05<br>(.00,.10)           | .050     | 1698     | .03<br>(-.03,.09)         | .409     | 1086     |

|                               |                     |       |      |                     |       |      |                     |       |      |                     |       |      |                     |       |      |
|-------------------------------|---------------------|-------|------|---------------------|-------|------|---------------------|-------|------|---------------------|-------|------|---------------------|-------|------|
| Number of relationships       | .10<br>(.06,.15)    | <.001 | 1772 | .04<br>(-.02,.09)   | .173  | 1310 | .11<br>(.06,.16)    | <.001 | 1393 | -.06<br>(-.11,-.01) | .013  | 1796 | -.09<br>(-.15,-.03) | .002  | 1148 |
| Longest relationship          | .16<br>(.11,.21)    | <.001 | 1468 | -.06<br>(-.12,.00)  | .049  | 1070 | -.02<br>(-.08,.04)  | .568  | 1137 | -.03<br>(-.08,.02)  | .192  | 1485 | .03<br>(-.03,.09)   | .439  | 955  |
| Partner violence              | -.19<br>(-.23,-.14) | <.001 | 1700 | .28<br>(.23,.33)    | <.001 | 1255 | .14<br>(.09,.19)    | <.001 | 1334 | -.10<br>(-.15,-.05) | <.001 | 1720 | -.07<br>(-.13,-.01) | .015  | 1108 |
| Contact with mother           | .11<br>(.03,.19)    | .005  | 634  | .00<br>(-.08,.08)   | .971  | 591  | .00<br>(-.08,.08)   | .997  | 614  | -.21<br>(-.28,-.13) | <.001 | 637  | -.12<br>(-.21,-.03) | .015  | 435  |
| Communication with mother     | .07<br>(-.01,.15)   | .072  | 645  | -.02<br>(-.10,.06)  | .633  | 601  | -.05<br>(-.13,.03)  | .236  | 625  | -.04<br>(-.12,.04)  | .350  | 648  | .00<br>(-.09,.09)   | .942  | 443  |
| Contact with father           | .11<br>(.04,.19)    | .003  | 689  | -.10<br>(-.17,-.02) | .015  | 642  | -.03<br>(-.10,.05)  | .496  | 669  | -.10<br>(-.17,-.03) | .010  | 693  | -.11<br>(-.20,-.02) | .025  | 458  |
| Communication with father     | .16<br>(.09,.23)    | <.001 | 750  | -.18<br>(-.25,-.11) | <.001 | 694  | -.04<br>(-.11,.03)  | .256  | 727  | .07<br>(.00,.14)    | .073  | 754  | -.02<br>(-.11,.07)  | .657  | 500  |
| Peer pressure                 | -.17<br>(-.21,-.12) | <.001 | 1740 | .23<br>(.18,.28)    | <.001 | 1311 | .15<br>(.10,.20)    | <.001 | 1375 | -.01<br>(-.06,.04)  | .609  | 1766 | -.04<br>(-.10,.02)  | .141  | 1128 |
| Physical peer victimisation   | -.10<br>(-.15,-.05) | <.001 | 1388 | .17<br>(.12,.22)    | <.001 | 1291 | .11<br>(.05,.16)    | <.001 | 1369 | -.02<br>(-.07,.03)  | .449  | 1402 | -.05<br>(-.11,.01)  | .165  | 917  |
| Social peer victimisation     | -.17<br>(-.22,-.12) | <.001 | 1388 | .35<br>(.30,.40)    | <.001 | 1291 | .16<br>(.11,.21)    | <.001 | 1369 | .01<br>(-.04,.06)   | .840  | 1402 | -.05<br>(-.11,.01)  | .128  | 917  |
| Verbal peer victimisation     | -.13<br>(-.18,-.07) | <.001 | 1387 | .28<br>(.23,.33)    | <.001 | 1290 | .13<br>(.08,.18)    | <.001 | 1368 | .04<br>(-.01,.09)   | .145  | 1401 | .01<br>(-.05,.07)   | .766  | 916  |
| Cyber peer victimisation      | -.14<br>(-.19,-.09) | <.001 | 1387 | .27<br>(.22,.32)    | <.001 | 1290 | .12<br>(.07,.17)    | <.001 | 1368 | .01<br>(-.04,.06)   | .681  | 1401 | -.05<br>(-.11,.01)  | .146  | 916  |
| Physical peer Perpetration    | -.07<br>(-.12,-.01) | .012  | 1386 | .13<br>(.07,.18)    | <.001 | 1291 | .08<br>(.03,.13)    | .002  | 1368 | -.07<br>(-.12,-.02) | .006  | 1400 | -.14<br>(-.20,-.08) | <.001 | 916  |
| Social peer Perpetration      | -.16<br>(-.21,-.11) | <.001 | 1386 | .31<br>(.26,.36)    | <.001 | 1291 | .13<br>(.07,.18)    | <.001 | 1368 | -.04<br>(-.09,.01)  | .120  | 1400 | -.07<br>(-.13,-.01) | .051  | 916  |
| Verbal peer Perpetration      | -.08<br>(-.13,-.02) | .004  | 1386 | .17<br>(.12,.22)    | <.001 | 1291 | .10<br>(.05,.15)    | <.001 | 1368 | .02<br>(-.03,.07)   | .572  | 1400 | .00<br>(-.06,.06)   | .955  | 916  |
| Cyber peer Perpetration       | -.08<br>(-.14,-.03) | .002  | 1386 | .17<br>(.11,.22)    | <.001 | 1291 | .10<br>(.04,.15)    | <.001 | 1368 | -.03<br>(-.08,.02)  | .277  | 1400 | -.06<br>(-.12,.00)  | .097  | 916  |
| Parental role aspirations     | .14<br>(.09,.19)    | <.001 | 1423 | -.13<br>(-.18,-.08) | <.001 | 1309 | -.05<br>(-.10,.01)  | .088  | 1387 | .01<br>(-.04,.06)   | .781  | 1438 | -.01<br>(-.07,.05)  | .676  | 938  |
| Occupational role aspirations | .02<br>(-.03,.07)   | .464  | 1423 | -.09<br>(-.15,-.04) | .001  | 1309 | -.05<br>(-.10,.01)  | .082  | 1387 | .09<br>(.04,.14)    | <.001 | 1438 | .08<br>(.02,.14)    | .017  | 938  |
| Homecare role aspirations     | .20<br>(.15,.25)    | <.001 | 1423 | -.08<br>(-.13,-.02) | .005  | 1309 | -.07<br>(-.12,-.02) | .010  | 1387 | -.02<br>(-.07,.03)  | .398  | 1438 | -.02<br>(-.08,.04)  | .630  | 938  |



|                                      |                     |       |      |                     |       |      |                     |       |      |                     |       |      |                     |       |      |
|--------------------------------------|---------------------|-------|------|---------------------|-------|------|---------------------|-------|------|---------------------|-------|------|---------------------|-------|------|
| Importance of Relationships          | .15<br>(.10,.20)    | <.001 | 1755 | -.04<br>(-.10,.01)  | .143  | 1305 | .03<br>(-.02,.09)   | .215  | 1380 | .06<br>(.01,.11)    | .012  | 1780 | .03<br>(-.03,.09)   | .253  | 1139 |
| Achievement Motivation               | .10<br>(.05,.14)    | <.001 | 1755 | -.03<br>(-.09,.02)  | .259  | 1305 | .01<br>(-.04,.06)   | .705  | 1380 | .07<br>(.02,.12)    | .005  | 1780 | .04<br>(-.02,.10)   | .182  | 1139 |
| Purpose in Life                      | .43<br>(.39,.46)    | <.001 | 1755 | -.50<br>(-.54,-.46) | <.001 | 1305 | -.20<br>(-.25,-.15) | <.001 | 1380 | .07<br>(.02,.12)    | .002  | 1780 | .12<br>(.06,.18)    | <.001 | 1139 |
| Importance of democracy and equality | -.01<br>(-.05,.04)  | .748  | 1755 | .04<br>(-.02,.09)   | .189  | 1303 | .02<br>(-.03,.07)   | .465  | 1379 | .12<br>(.07,.17)    | <.001 | 1780 | .07<br>(.01,.13)    | .013  | 1140 |
| Environmental concerns               | .00<br>(-.04,.05)   | .913  | 1756 | -.03<br>(-.09,.02)  | .256  | 1304 | -.06<br>(-.11,.00)  | .035  | 1380 | .19<br>(.14,.23)    | <.001 | 1781 | .22<br>(.16,.27)    | <.001 | 1140 |
| Religiosity                          | .04<br>(-.01,.08)   | .110  | 1744 | -.01<br>(-.06,.05)  | .756  | 1312 | .01<br>(-.04,.06)   | .728  | 1377 | .04<br>(-.01,.09)   | .133  | 1769 | .04<br>(-.02,.10)   | .203  | 1128 |
| Importance of leisure                | .32<br>(.27,.36)    | <.001 | 1394 | -.39<br>(-.43,-.34) | <.001 | 1312 | -.19<br>(-.24,-.13) | <.001 | 1380 | .10<br>(.05,.15)    | <.001 | 1408 | .11<br>(.05,.17)    | .001  | 919  |
| Alcohol use                          | -.08<br>(-.13,-.02) | .004  | 1297 | .11<br>(.05,.16)    | <.001 | 1209 | .10<br>(.04,.15)    | <.001 | 1279 | .06<br>(.01,.11)    | .037  | 1313 | .04<br>(-.03,.11)   | .197  | 863  |
| Ever smoked                          | -.06<br>(-.11,.00)  | .041  | 1400 | .09<br>(.03,.14)    | .002  | 1298 | .10<br>(.05,.16)    | <.001 | 1380 | -.06<br>(-.11,-.01) | .016  | 1415 | -.06<br>(-.12,.00)  | .056  | 929  |
| Ever vaped                           | -.06<br>(-.11,-.01) | .019  | 1400 | .13<br>(.07,.18)    | <.001 | 1300 | .15<br>(.09,.20)    | <.001 | 1378 | -.13<br>(-.18,-.08) | <.001 | 1415 | -.13<br>(-.19,-.07) | <.001 | 927  |
| Cognitive enhancers                  | -.10<br>(-.16,-.05) | <.001 | 1387 | .15<br>(.09,.20)    | <.001 | 1285 | .12<br>(.07,.17)    | <.001 | 1369 | .00<br>(-.05,.05)   | .929  | 1400 | .04<br>(-.02,.10)   | .274  | 921  |
| Big 5 Agreeableness                  | .06<br>(.01,.11)    | .013  | 1677 | -.03<br>(-.08,.03)  | .368  | 1312 | -.07<br>(-.12,-.01) | .015  | 1325 | .05<br>(.00,.10)    | .065  | 1702 | .00<br>(-.06,.06)   | .996  | 1095 |
| Big 5 Conscientiousness              | .26<br>(.21,.30)    | <.001 | 1677 | -.29<br>(-.34,-.24) | <.001 | 1312 | -.15<br>(-.20,-.10) | <.001 | 1325 | .09<br>(.04,.14)    | <.001 | 1702 | .05<br>(-.01,.11)   | .091  | 1095 |
| Big 5 Extraversion                   | .25<br>(.21,.30)    | <.001 | 1677 | -.35<br>(-.40,-.31) | <.001 | 1312 | -.13<br>(-.18,-.07) | <.001 | 1325 | .04<br>(-.01,.09)   | .093  | 1702 | -.01<br>(-.07,.05)  | .695  | 1095 |
| Big 5 Neuroticism                    | -.34<br>(-.39,-.30) | <.001 | 1677 | .61<br>(.57,.64)    | <.001 | 1312 | .31<br>(.26,.35)    | <.001 | 1325 | -.08<br>(-.13,-.03) | .002  | 1702 | -.05<br>(-.11,.01)  | .086  | 1095 |
| Big 5 Openness                       | -.15<br>(-.20,-.10) | <.001 | 1677 | .17<br>(.12,.22)    | <.001 | 1312 | .06<br>(.01,.12)    | .024  | 1325 | .07<br>(.02,.12)    | .006  | 1702 | .02<br>(-.04,.08)   | .538  | 1095 |
| Self-control                         | .28<br>(.23,.32)    | <.001 | 1677 | -.46<br>(-.50,-.41) | <.001 | 1312 | -.22<br>(-.27,-.17) | <.001 | 1325 | .08<br>(.03,.13)    | .001  | 1702 | .09<br>(.03,.15)    | .004  | 1095 |
| Not planning for the future          | -.16<br>(-.21,-.12) | <.001 | 1677 | .20<br>(.15,.26)    | <.001 | 1312 | .10<br>(.05,.16)    | <.001 | 1325 | -.10<br>(-.15,-.05) | <.001 | 1702 | -.10<br>(-.16,-.04) | .001  | 1095 |

|                                           |                     |       |      |                     |       |      |                     |       |      |                     |       |      |                    |       |      |
|-------------------------------------------|---------------------|-------|------|---------------------|-------|------|---------------------|-------|------|---------------------|-------|------|--------------------|-------|------|
| Ambition                                  | .16<br>(.11,.21)    | <.001 | 1424 | -.21<br>(-.26,-.15) | <.001 | 1312 | -.09<br>(-.14,-.04) | .001  | 1395 | .09<br>(.04,.14)    | .001  | 1439 | .09<br>(.03,.15)   | .009  | 939  |
| Physical activity                         | .20<br>(.15,.24)    | <.001 | 1767 | -.20<br>(-.25,-.15) | <.001 | 1309 | -.16<br>(-.21,-.11) | <.001 | 1390 | .08<br>(.03,.13)    | .002  | 1791 | .04<br>(-.02,.10)  | .142  | 1147 |
| Health behaviours                         | .09<br>(.05,.14)    | <.001 | 1771 | -.16<br>(-.21,-.10) | <.001 | 1311 | -.14<br>(-.19,-.08) | <.001 | 1395 | .15<br>(.10,.19)    | <.001 | 1796 | .14<br>(.08,.20)   | <.001 | 1149 |
| Risk taking behaviour                     | -.08<br>(-.13,-.04) | .001  | 1677 | .08<br>(.02,.13)    | .005  | 1312 | .17<br>(.12,.23)    | <.001 | 1324 | -.01<br>(-.06,.04)  | .722  | 1702 | -.06<br>(-.12,.00) | .057  | 1093 |
| Risky sexual behaviour                    | .09<br>(.04,.13)    | <.001 | 1682 | .03<br>(-.02,.09)   | .261  | 1252 | .11<br>(.05,.16)    | <.001 | 1329 | -.08<br>(-.13,-.03) | .001  | 1708 | -.05<br>(-.11,.01) | .088  | 1094 |
| Media use                                 | .02<br>(-.02,.07)   | .305  | 1763 | -.01<br>(-.06,.05)  | .852  | 1301 | .06<br>(.00,.11)    | .037  | 1382 | .04<br>(-.01,.09)   | .125  | 1785 | .02<br>(-.04,.08)  | .456  | 1142 |
| Volunteering                              | .08<br>(.03,.12)    | .001  | 1744 | -.03<br>(-.08,.03)  | .336  | 1312 | .06<br>(.00,.11)    | .037  | 1377 | .09<br>(.04,.14)    | <.001 | 1769 | .03<br>(-.03,.09)  | .252  | 1128 |
| Internet dating (scale)                   | -.15<br>(-.20,-.10) | <.001 | 1756 | .10<br>(.04,.15)    | .001  | 1298 | .03<br>(-.02,.08)   | .257  | 1379 | .10<br>(.05,.15)    | <.001 | 1779 | -.01<br>(-.07,.05) | .840  | 1141 |
| Internet dating (y/n)                     | -.11<br>(-.16,-.06) | <.001 | 1760 | .08<br>(.03,.14)    | .003  | 1301 | .03<br>(-.02,.08)   | .276  | 1382 | .08<br>(.03,.13)    | .001  | 1784 | -.02<br>(-.08,.04) | .554  | 1142 |
| Financial literacy: Knowledge of Products | .23<br>(.19,.28)    | <.001 | 1774 | -.15<br>(-.20,-.10) | <.001 | 1293 | -.05<br>(-.11,.00)  | .046  | 1374 | .05<br>(.00,.10)    | .044  | 1769 | .04<br>(-.02,.10)  | .181  | 1137 |
| Financial attitudes and behaviour         | .31<br>(.27,.36)    | <.001 | 1774 | -.22<br>(-.27,-.17) | <.001 | 1293 | -.18<br>(-.23,-.13) | <.001 | 1374 | .06<br>(.01,.11)    | .010  | 1769 | .08<br>(.02,.14)   | .006  | 1137 |

| (c) Females           |                     |          |          |                       |          |          |                         |          |          |                            |          |          |                           |          |          |
|-----------------------|---------------------|----------|----------|-----------------------|----------|----------|-------------------------|----------|----------|----------------------------|----------|----------|---------------------------|----------|----------|
| Trait                 | Wellbeing           |          |          | Adverse mental health |          |          | Adverse physical health |          |          | Achieved educational level |          |          | Planned educational level |          |          |
|                       | <i>r</i>            | <i>p</i> | <i>n</i> | <i>r</i>              | <i>p</i> | <i>n</i> | <i>r</i>                | <i>p</i> | <i>n</i> | <i>r</i>                   | <i>p</i> | <i>n</i> | <i>r</i>                  | <i>p</i> | <i>n</i> |
| Daily hassles         | -.28<br>(-.32,-.24) | <.001    | 2466     | .52<br>(.49,.55)      | <.001    | 2295     | .28<br>(.24,.32)        | <.001    | 2482     | .02<br>(-.02,.06)          | .239     | 2526     | .02<br>(-.03,.07)         | .535     | 1717     |
| CHAOS                 | -.33<br>(-.36,-.29) | <.001    | 2851     | .34<br>(.31,.38)      | <.001    | 2297     | .23<br>(.19,.27)        | <.001    | 2484     | -.08<br>(-.12,-.04)        | <.001    | 2930     | -.08<br>(-.12,-.04)       | .001     | 1972     |
| Childhood experiences | -.25<br>(-.28,-.21) | <.001    | 2467     | .36<br>(.32,.39)      | <.001    | 2286     | .23<br>(.20,.27)        | <.001    | 2471     | -.03<br>(-.07,.01)         | .113     | 2525     | -.05<br>(-.10,.00)        | .058     | 1718     |
| Poor sleep quality    | -.24<br>(-.27,-.20) | <.001    | 2431     | .52<br>(.49,.55)      | <.001    | 2287     | .40<br>(.37,.44)        | <.001    | 2481     | -.03<br>(-.07,.01)         | .098     | 2492     | -.01<br>(-.06,.04)        | .614     | 1691     |
| Marriage hopes        | .15<br>(.11,.18)    | <.001    | 2851     | -.08<br>(-.12,-.04)   | <.001    | 2298     | -.07<br>(-.10,-.03)     | .001     | 2484     | .10<br>(.06,.14)           | <.001    | 2929     | .07<br>(.03,.11)          | .003     | 1972     |

|                                     |                     |       |      |                     |       |      |                     |       |      |                     |       |      |                     |        |      |
|-------------------------------------|---------------------|-------|------|---------------------|-------|------|---------------------|-------|------|---------------------|-------|------|---------------------|--------|------|
| Marriage worries                    | -.33<br>(-.37,-.30) | <.001 | 2852 | .25<br>(.21,.28)    | <.001 | 2299 | .16<br>(.12,.19)    | <.001 | 2485 | -.04<br>(-.08,.00)  | .059  | 2930 | -.04<br>(-.08,.00)  | .114   | 1972 |
| Quality of relationship with twin   | .19<br>(.16,.23)    | <.001 | 2815 | -.22<br>(-.26,-.18) | <.001 | 2274 | -.09<br>(-.13,-.05) | <.001 | 2459 | .03<br>(-.01,.07)   | .107  | 2894 | .02<br>(-.02,.06)   | .374   | 1951 |
| Quality of relationship with mother | .24<br>(.20,.27)    | <.001 | 2788 | -.25<br>(-.29,-.21) | <.001 | 2256 | -.08<br>(-.12,-.04) | <.001 | 2437 | -.01<br>(-.05,.03)  | .551  | 2866 | .01<br>(-.03,.05)   | .668   | 1932 |
| Quality of relationship with father | .23<br>(.19,.27)    | <.001 | 2725 | -.26<br>(-.30,-.22) | <.001 | 2208 | -.14<br>(-.18,-.10) | <.001 | 2389 | .04<br>(.00,.08)    | .039  | 2799 | .00<br>(-.05,.05)   | .873   | 1883 |
| Number of relationships             | .04<br>(.00,.07)    | .047  | 2851 | .14<br>(.10,.18)    | <.001 | 2298 | .19<br>(.15,.22)    | <.001 | 2484 | -.07<br>(-.11,-.03) | <.001 | 2930 | -.04<br>(-.08,.00)  | .076   | 1971 |
| Longest relationship                | .17<br>(.14,.21)    | <.001 | 2413 | -.01<br>(-.05,.04)  | .820  | 1935 | .01<br>(-.03,.05)   | .572  | 2095 | -.09<br>(-.13,-.05) | <.001 | 2478 | -.08<br>(-.13,-.03) | .002   | 1647 |
| Partner violence                    | -.22<br>(-.26,-.19) | <.001 | 2776 | .33<br>(.29,.37)    | <.001 | 2241 | .25<br>(.21,.29)    | <.001 | 2424 | -.10<br>(-.14,-.06) | <.001 | 2853 | -.07<br>(-.11,-.03) | .004   | 1926 |
| Contact with mother                 | .09<br>(.03,.14)    | .003  | 1164 | -.03<br>(-.09,.03)  | .323  | 1078 | .04<br>(-.02,.09)   | .216  | 1158 | -.27<br>(-.32,-.22) | <.001 | 1180 | -.23<br>(-.29,-.16) | <.001  | 828  |
| Communication with mother           | .11<br>(.05,.17)    | <.001 | 1186 | -.13<br>(-.18,-.07) | <.001 | 1097 | -.03<br>(-.09,.03)  | .311  | 1178 | -.05<br>(-.11,.01)  | .122  | 1201 | -.04<br>(-.11,.03)  | .237   | 840  |
| Contact with father                 | .10<br>(.04,.15)    | .001  | 1268 | -.08<br>(-.13,-.02) | .009  | 1177 | -.01<br>(-.06,.05)  | .859  | 1265 | -.16<br>(-.21,-.11) | <.001 | 1287 | -.17<br>(-.23,-.11) | <.001  | 882  |
| Communication with father           | .12<br>(.07,.17)    | <.001 | 1388 | -.15<br>(-.20,-.09) | <.001 | 1283 | -.10<br>(-.15,-.05) | <.001 | 1380 | .04<br>(-.01,.09)   | .124  | 1410 | .04<br>(-.02,.10)   | .190   | 971  |
| Peer pressure                       | -.22<br>(-.26,-.19) | <.001 | 2797 | .29<br>(.25,.32)    | <.001 | 2297 | .14<br>(.11,.18)    | <.001 | 2445 | .05<br>(.01,.09)    | .009  | 2876 | .00<br>(-.04,.04)   | 1<.001 | 1939 |
| Physical peer victimisation         | -.10<br>(-.13,-.06) | <.001 | 2393 | .16<br>(.12,.20)    | <.001 | 2244 | .14<br>(.10,.17)    | <.001 | 2423 | -.05<br>(-.09,-.01) | .009  | 2450 | -.02<br>(-.07,.03)  | .428   | 1667 |
| Social peer victimisation           | -.20<br>(-.24,-.16) | <.001 | 2392 | .41<br>(.38,.45)    | <.001 | 2243 | .23<br>(.19,.26)    | <.001 | 2422 | -.05<br>(-.09,-.01) | .022  | 2449 | -.05<br>(-.10,.00)  | .047   | 1667 |
| Verbal peer victimisation           | -.22<br>(-.25,-.18) | <.001 | 2393 | .44<br>(.40,.47)    | <.001 | 2244 | .26<br>(.23,.30)    | <.001 | 2423 | -.03<br>(-.07,.01)  | .127  | 2450 | -.01<br>(-.06,.04)  | .632   | 1667 |
| Cyber peer victimisation            | -.18<br>(-.22,-.14) | <.001 | 2393 | .39<br>(.35,.42)    | <.001 | 2244 | .27<br>(.23,.31)    | <.001 | 2423 | -.08<br>(-.12,-.04) | <.001 | 2450 | -.08<br>(-.13,-.03) | .002   | 1667 |
| Physical peer Perpetration          | -.05<br>(-.09,-.01) | .013  | 2395 | .14<br>(.10,.18)    | <.001 | 2246 | .10<br>(.06,.14)    | <.001 | 2425 | -.08<br>(-.12,-.04) | <.001 | 2452 | -.06<br>(-.11,-.01) | .010   | 1668 |
| Social peer Perpetration            | -.16<br>(-.20,-.12) | <.001 | 2395 | .29<br>(.25,.33)    | <.001 | 2246 | .17<br>(.13,.21)    | <.001 | 2425 | -.07<br>(-.11,-.03) | .001  | 2452 | -.06<br>(-.11,-.01) | .010   | 1668 |

|                                      |                     |       |      |                     |       |      |                     |       |      |                     |       |      |                     |       |      |
|--------------------------------------|---------------------|-------|------|---------------------|-------|------|---------------------|-------|------|---------------------|-------|------|---------------------|-------|------|
| Verbal peer Perpetration             | -.13<br>(-.17,-.09) | <.001 | 2395 | .26<br>(.22,.30)    | <.001 | 2246 | .16<br>(.12,.19)    | <.001 | 2425 | -.04<br>(-.08,.00)  | .030  | 2452 | -.04<br>(-.09,.01)  | .088  | 1668 |
| Cyber peer Perpetration              | -.10<br>(-.13,-.06) | <.001 | 2395 | .21<br>(.17,.25)    | <.001 | 2246 | .17<br>(.13,.21)    | <.001 | 2425 | -.06<br>(-.10,-.02) | .003  | 2452 | -.09<br>(-.14,-.04) | <.001 | 1668 |
| Parental role aspirations            | .15<br>(.11,.19)    | <.001 | 2474 | -.14<br>(-.18,-.10) | <.001 | 2289 | -.04<br>(-.08,.00)  | .045  | 2474 | -.08<br>(-.12,-.04) | <.001 | 2532 | -.03<br>(-.08,.02)  | .309  | 1723 |
| Occupational role aspirations        | .02<br>(-.02,.06)   | .337  | 2474 | -.03<br>(-.07,.02)  | .210  | 2289 | -.03<br>(-.06,.01)  | .208  | 2474 | .14<br>(.10,.18)    | <.001 | 2532 | .07<br>(.02,.12)    | .003  | 1723 |
| Homecare role aspirations            | .18<br>(.14,.22)    | <.001 | 2474 | -.09<br>(-.13,-.05) | <.001 | 2289 | -.03<br>(-.07,.01)  | .202  | 2474 | -.07<br>(-.11,-.03) | .001  | 2532 | -.07<br>(-.12,-.02) | .004  | 1723 |
| Importance of Relationships          | .20<br>(.16,.23)    | <.001 | 2822 | -.14<br>(-.18,-.09) | <.001 | 2285 | -.03<br>(-.07,.01)  | .106  | 2461 | .03<br>(-.01,.07)   | .135  | 2901 | .00<br>(-.04,.04)   | .990  | 1955 |
| Achievement Motivation               | .09<br>(.05,.12)    | <.001 | 2822 | -.05<br>(-.09,-.01) | .018  | 2285 | -.02<br>(-.06,.02)  | .296  | 2461 | .03<br>(-.01,.07)   | .095  | 2901 | .04<br>(.00,.08)    | .096  | 1955 |
| Purpose in Life                      | .44<br>(.41,.47)    | <.001 | 2821 | -.59<br>(-.61,-.56) | <.001 | 2285 | -.25<br>(-.28,-.21) | <.001 | 2461 | .05<br>(.01,.09)    | .006  | 2900 | .06<br>(.02,.10)    | .007  | 1955 |
| Importance of democracy and equality | -.03<br>(-.06,.01)  | .161  | 2825 | .05<br>(.01,.09)    | .018  | 2284 | -.01<br>(-.05,.03)  | .567  | 2462 | .18<br>(.14,.22)    | <.001 | 2904 | .14<br>(.10,.18)    | <.001 | 1956 |
| Environmental concerns               | -.02<br>(-.05,.02)  | .352  | 2825 | -.01<br>(-.05,.03)  | .650  | 2284 | -.08<br>(-.12,-.04) | <.001 | 2462 | .18<br>(.14,.22)    | <.001 | 2904 | .17<br>(.13,.21)    | <.001 | 1956 |
| Religiosity                          | .01<br>(-.03,.04)   | .721  | 2799 | .05<br>(.00,.09)    | .030  | 2298 | .02<br>(-.02,.06)   | .242  | 2446 | .07<br>(.03,.11)    | <.001 | 2878 | .08<br>(.04,.12)    | <.001 | 1940 |
| Importance of leisure                | .32<br>(.28,.35)    | <.001 | 2436 | -.41<br>(-.44,-.37) | <.001 | 2298 | -.24<br>(-.27,-.20) | <.001 | 2477 | .12<br>(.08,.16)    | <.001 | 2497 | .10<br>(.05,.15)    | <.001 | 1695 |
| Alcohol use                          | -.13<br>(-.17,-.08) | <.001 | 2219 | .16<br>(.12,.21)    | <.001 | 2074 | .11<br>(.07,.15)    | <.001 | 2238 | .01<br>(-.03,.05)   | .514  | 2267 | .02<br>(-.03,.07)   | .557  | 1567 |
| Ever smoked                          | -.11<br>(-.15,-.07) | <.001 | 2434 | .13<br>(.09,.17)    | <.001 | 2276 | .10<br>(.06,.14)    | <.001 | 2457 | -.07<br>(-.11,-.03) | .001  | 2491 | -.06<br>(-.11,-.01) | .014  | 1693 |
| Ever vaped                           | -.12<br>(-.16,-.08) | <.001 | 2435 | .18<br>(.13,.21)    | <.001 | 2277 | .18<br>(.14,.22)    | <.001 | 2459 | -.14<br>(-.18,-.10) | <.001 | 2492 | -.10<br>(-.15,-.05) | <.001 | 1697 |
| Cognitive enhancers                  | -.18<br>(-.22,-.14) | <.001 | 2422 | .28<br>(.24,.32)    | <.001 | 2265 | .15<br>(.11,.19)    | <.001 | 2447 | -.01<br>(-.05,.03)  | .799  | 2477 | .01<br>(-.04,.06)   | .624  | 1688 |
| Big 5 Agreeableness                  | .12<br>(.08,.16)    | <.001 | 2683 | -.15<br>(-.18,-.10) | <.001 | 2296 | -.07<br>(-.11,-.02) | .002  | 2340 | .00<br>(-.04,.04)   | .928  | 2747 | .02<br>(-.03,.07)   | .421  | 1866 |
| Big 5 Conscientiousness              | .27<br>(.23,.30)    | <.001 | 2684 | -.29<br>(-.33,-.25) | <.001 | 2296 | -.17<br>(-.21,-.13) | <.001 | 2340 | .09<br>(.05,.13)    | <.001 | 2748 | .09<br>(.04,.13)    | <.001 | 1866 |

|                                           |                     |       |      |                     |       |      |                     |       |      |                     |       |      |                     |       |      |
|-------------------------------------------|---------------------|-------|------|---------------------|-------|------|---------------------|-------|------|---------------------|-------|------|---------------------|-------|------|
| Big 5 Extraversion                        | .29<br>(.25,.32)    | <.001 | 2683 | -.45<br>(-.48,-.42) | <.001 | 2296 | -.17<br>(-.21,-.13) | <.001 | 2340 | .09<br>(.05,.13)    | <.001 | 2747 | .06<br>(.01,.11)    | .012  | 1866 |
| Big 5 Neuroticism                         | -.36<br>(-.39,-.33) | <.001 | 2684 | .67<br>(.64,.69)    | <.001 | 2296 | .30<br>(.27,.34)    | <.001 | 2340 | -.01<br>(-.05,.03)  | .626  | 2748 | -.02<br>(-.07,.03)  | .311  | 1866 |
| Big 5 Openness                            | -.13<br>(-.17,-.10) | <.001 | 2683 | .10<br>(.06,.14)    | <.001 | 2296 | .03<br>(-.01,.07)   | .120  | 2340 | .07<br>(.03,.11)    | <.001 | 2747 | .02<br>(-.03,.07)   | .493  | 1866 |
| Self-control                              | .29<br>(.25,.32)    | <.001 | 2684 | -.45<br>(-.48,-.42) | <.001 | 2296 | -.26<br>(-.30,-.23) | <.001 | 2340 | .07<br>(.03,.11)    | <.001 | 2748 | .05<br>(.00,.10)    | .031  | 1866 |
| Not planning for the future               | -.16<br>(-.20,-.13) | <.001 | 2684 | .16<br>(.11,.19)    | <.001 | 2296 | .07<br>(.03,.11)    | <.001 | 2340 | -.10<br>(-.14,-.06) | <.001 | 2748 | -.12<br>(-.16,-.08) | <.001 | 1866 |
| Ambition                                  | .13<br>(.10,.17)    | <.001 | 2466 | -.12<br>(-.16,-.08) | <.001 | 2295 | -.06<br>(-.10,-.02) | .001  | 2482 | .12<br>(.08,.16)    | <.001 | 2526 | .10<br>(.05,.15)    | <.001 | 1717 |
| Physical activity                         | .12<br>(.08,.16)    | <.001 | 2849 | -.12<br>(-.16,-.08) | <.001 | 2297 | -.13<br>(-.17,-.10) | <.001 | 2484 | .12<br>(.08,.16)    | <.001 | 2929 | .09<br>(.05,.13)    | <.001 | 1971 |
| Health behaviours                         | .12<br>(.08,.15)    | <.001 | 2852 | -.21<br>(-.24,-.17) | <.001 | 2299 | -.15<br>(-.19,-.11) | <.001 | 2486 | .17<br>(.13,.20)    | <.001 | 2932 | .16<br>(.12,.20)    | <.001 | 1973 |
| Risk taking behaviour                     | -.14<br>(-.18,-.11) | <.001 | 2686 | .15<br>(.11,.19)    | <.001 | 2299 | .13<br>(.09,.17)    | <.001 | 2341 | .03<br>(-.01,.07)   | .150  | 2750 | .02<br>(-.03,.07)   | .439  | 1865 |
| Risky sexual behaviour                    | .04<br>(.01,.08)    | .025  | 2704 | .05<br>(.01,.09)    | .019  | 2193 | .10<br>(.06,.14)    | <.001 | 2361 | -.08<br>(-.12,-.04) | <.001 | 2779 | -.05<br>(-.10,.00)  | .021  | 1876 |
| Media use                                 | -.02<br>(-.06,.02)  | .267  | 2842 | .06<br>(.02,.10)    | .003  | 2286 | .10<br>(.06,.14)    | <.001 | 2469 | -.03<br>(-.07,.01)  | .118  | 2911 | -.03<br>(-.07,.01)  | .196  | 1963 |
| Volunteering                              | .06<br>(.02,.09)    | .003  | 2799 | .06<br>(.02,.10)    | .003  | 2299 | .10<br>(.06,.14)    | <.001 | 2448 | .12<br>(.08,.16)    | <.001 | 2878 | .12<br>(.08,.16)    | <.001 | 1942 |
| Internet dating (scale)                   | -.20<br>(-.23,-.16) | <.001 | 2831 | .11<br>(.07,.15)    | <.001 | 2280 | .12<br>(.08,.16)    | <.001 | 2465 | .08<br>(.04,.12)    | <.001 | 2904 | .05<br>(.01,.09)    | .035  | 1961 |
| Internet dating (y/n)                     | -.18<br>(-.21,-.14) | <.001 | 2837 | .12<br>(.08,.16)    | <.001 | 2285 | .13<br>(.09,.17)    | <.001 | 2470 | .06<br>(.02,.10)    | .001  | 2910 | .04<br>(.00,.08)    | .071  | 1963 |
| Financial literacy: Knowledge of Products | .22<br>(.18,.25)    | <.001 | 2852 | -.13<br>(-.17,-.09) | <.001 | 2242 | -.03<br>(-.07,.01)  | .126  | 2415 | -.01<br>(-.05,.03)  | .773  | 2847 | -.01<br>(-.05,.03)  | .679  | 1922 |
| Financial attitudes and behaviour         | .32<br>(.29,.35)    | <.001 | 2851 | -.17<br>(-.21,-.13) | <.001 | 2241 | -.13<br>(-.17,-.09) | <.001 | 2414 | .07<br>(.03,.11)    | <.001 | 2846 | .04<br>(.00,.08)    | .078  | 1921 |

Note. Scores were corrected for mean age and sex differences (see Methods). These results are based on one twin randomly selected from each pair so that the data points are independent.

**Table S7.** Summary of multiple regression analyses: variance explained in composite scores of adverse physical and adverse mental health, wellbeing and educational attainment psychological traits, for the whole sample (a) and then separately for males (b) and females (c) (95% confidence intervals are in parentheses).

| (a)                                 | All               |             |         |                        |          |                       |             |         |                        |          |                         |             |         |                        |          |                            |             |         |                        |          |                           |             |         |                        |          |
|-------------------------------------|-------------------|-------------|---------|------------------------|----------|-----------------------|-------------|---------|------------------------|----------|-------------------------|-------------|---------|------------------------|----------|----------------------------|-------------|---------|------------------------|----------|---------------------------|-------------|---------|------------------------|----------|
|                                     | Wellbeing         |             |         |                        |          | Adverse mental health |             |         |                        |          | Adverse physical health |             |         |                        |          | Achieved educational level |             |         |                        |          | Planned educational level |             |         |                        |          |
|                                     | <i>B</i>          | <i>SE B</i> | $\beta$ | <i>sr</i> <sup>2</sup> | <i>p</i> | <i>B</i>              | <i>SE B</i> | $\beta$ | <i>sr</i> <sup>2</sup> | <i>p</i> | <i>B</i>                | <i>SE B</i> | $\beta$ | <i>sr</i> <sup>2</sup> | <i>p</i> | <i>B</i>                   | <i>SE B</i> | $\beta$ | <i>sr</i> <sup>2</sup> | <i>p</i> | <i>B</i>                  | <i>SE B</i> | $\beta$ | <i>sr</i> <sup>2</sup> | <i>p</i> |
| Daily hassles                       | -.05 (-.11, .01)  | .03         | -.05    | .001                   | .106     | .14 (.10, .18)        | .02         | .14     | .013                   | .000     | .07 (.00, .13)          | .03         | .06     | .003                   | .048     | .00 (-.06, .07)            | .03         | .00     | .000                   | .910     | -.02 (-.09, .06)          | .04         | -.02    | .000                   | .683     |
| CHAOS                               | -.12 (-.17, -.07) | .03         | -.12    | .011                   | .000     | .07 (.03, .10)        | .02         | .07     | .003                   | .001     | .11 (.06, .17)          | .03         | .11     | .010                   | .000     | -.03 (-.08, .03)           | .03         | -.03    | .001                   | .388     | -.01 (-.07, .06)          | .03         | -.01    | .000                   | .879     |
| Childhood experiences               | -.05 (-.11, .01)  | .03         | -.05    | .002                   | .072     | .06 (.02, .10)        | .02         | .06     | .003                   | .002     | .03 (-.03, .09)         | .03         | .03     | .001                   | .292     | .01 (-.05, .07)            | .03         | .01     | .000                   | .727     | .04 (-.03, .11)           | .04         | .04     | .001                   | .281     |
| Poor sleep quality                  | -.04 (-.10, .02)  | .03         | -.04    | .001                   | .162     | .17 (.13, .21)        | .02         | .17     | .021                   | .000     | .21 (.15, .27)          | .03         | .21     | .029                   | .000     | .02 (-.04, .08)            | .03         | .02     | .000                   | .514     | .01 (-.06, .08)           | .04         | .01     | .000                   | .871     |
| Marriage hopes                      | .00 (-.06, .05)   | .03         | .00     | .000                   | .929     | .02 (-.02, .05)       | .02         | .02     | .000                   | .388     | .02 (-.04, .07)         | .03         | .02     | .000                   | .504     | .03 (-.02, .09)            | .03         | .04     | .001                   | .262     | .02 (-.04, .09)           | .03         | .03     | .001                   | .471     |
| Marriage worries                    | -.04 (-.10, .01)  | .03         | -.04    | .001                   | .125     | -.02 (-.06, .01)      | .02         | -.03    | .000                   | .218     | .02 (-.04, .08)         | .03         | .02     | .000                   | .532     | .01 (-.05, .07)            | .03         | .01     | .000                   | .729     | .01 (-.06, .07)           | .04         | .01     | .000                   | .861     |
| Quality of relationship with twin   | .00 (-.05, .05)   | .03         | .00     | .000                   | .996     | .02 (-.02, .06)       | .02         | .02     | .000                   | .277     | -.01 (-.07, .04)        | .03         | -.01    | .000                   | .665     | -.01 (-.07, .05)           | .03         | -.01    | .000                   | .718     | .00 (-.07, .06)           | .03         | .00     | .000                   | .953     |
| Quality of relationship with mother | .04 (-.02, .09)   | .03         | .04     | .001                   | .164     | .01 (-.03, .05)       | .02         | .01     | .000                   | .692     | .05 (-.01, .10)         | .03         | .05     | .002                   | .123     | -.03 (-.09, .03)           | .03         | -.04    | .001                   | .302     | .00 (-.07, .07)           | .03         | .00     | .000                   | .944     |
| Quality of relationship with father | .06 (.00, .12)    | .03         | .06     | .002                   | .049     | -.05 (-.10, -.01)     | .02         | -.06    | .002                   | .013     | -.03 (-.09, .04)        | .03         | -.03    | .000                   | .409     | -.05 (-.11, .02)           | .03         | -.05    | .001                   | .172     | -.01 (-.09, .06)          | .04         | -.02    | .000                   | .720     |
| Number of relationships             | .04 (-.03, .10)   | .03         | .03     | .001                   | .240     | .04 (.00, .09)        | .02         | .04     | .001                   | .061     | .03 (-.04, .10)         | .04         | .02     | .000                   | .436     | .02 (-.05, .09)            | .04         | .02     | .000                   | .543     | .00 (-.08, .09)           | .04         | .00     | .000                   | .933     |
| Longest relationship                | .05 (.00, .11)    | .03         | .05     | .002                   | .060     | .04 (.00, .07)        | .02         | .04     | .001                   | .071     | .07 (.02, .13)          | .03         | .07     | .004                   | .014     | .02 (-.04, .08)            | .03         | .03     | .000                   | .422     | .00 (-.07, .07)           | .04         | .01     | .000                   | .906     |
| Partner violence                    | -.08 (-.14, -.03) | .03         | -.09    | .005                   | .002     | .08 (.04, .12)        | .02         | .09     | .005                   | .000     | .06 (.01, .12)          | .03         | .07     | .003                   | .028     | -.05 (-.11, .00)           | .03         | -.06    | .003                   | .056     | -.02 (-.09, .04)          | .03         | -.03    | .001                   | .502     |

|                               |                  |     |      |      |      |                   |     |      |      |      |                  |     |      |      |      |                   |     |      |      |      |                   |     |      |      |      |
|-------------------------------|------------------|-----|------|------|------|-------------------|-----|------|------|------|------------------|-----|------|------|------|-------------------|-----|------|------|------|-------------------|-----|------|------|------|
| Contact with mother           | .08 (.00, .15)   | .04 | .07  | .002 | .052 | -.03 (-.08, .03)  | .03 | -.03 | .000 | .338 | -.05 (-.13, .04) | .04 | -.04 | .001 | .278 | -.14 (-.23, -.06) | .04 | -.15 | .009 | .001 | -.19 (-.29, -.10) | .05 | -.22 | .017 | .000 |
| Communication with mother     | -.03 (-.10, .05) | .04 | -.02 | .000 | .488 | .00 (-.05, .05)   | .03 | .00  | .000 | .894 | .01 (-.06, .09)  | .04 | .01  | .000 | .740 | .03 (-.05, .10)   | .04 | .03  | .000 | .489 | .06 (-.03, .15)   | .04 | .06  | .002 | .169 |
| Contact with father           | -.01 (-.08, .07) | .04 | -.01 | .000 | .865 | .02 (-.04, .07)   | .03 | .02  | .000 | .541 | .04 (-.04, .13)  | .04 | .05  | .001 | .284 | -.01 (-.09, .07)  | .04 | -.01 | .000 | .778 | .00 (-.10, .10)   | .05 | .01  | .000 | .932 |
| Communication with father     | -.05 (-.13, .04) | .04 | -.04 | .001 | .280 | .02 (-.04, .08)   | .03 | .01  | .000 | .589 | .00 (-.09, .09)  | .05 | .00  | .000 | .971 | .08 (-.01, .18)   | .05 | .07  | .003 | .072 | .01 (-.09, .12)   | .05 | .01  | .000 | .817 |
| Peer pressure                 | -.02 (-.08, .04) | .03 | -.02 | .000 | .488 | .03 (-.01, .06)   | .02 | .03  | .000 | .195 | .03 (-.03, .09)  | .03 | .03  | .001 | .321 | .03 (-.03, .09)   | .03 | .03  | .001 | .311 | -.02 (-.09, .04)  | .03 | -.03 | .001 | .488 |
| Physical peer victimisation   | -.02 (-.08, .05) | .03 | -.02 | .000 | .637 | -.04 (-.08, .00)  | .02 | -.04 | .001 | .077 | -.02 (-.09, .05) | .04 | -.02 | .000 | .609 | .00 (-.07, .07)   | .04 | .00  | .000 | .959 | .01 (-.07, .09)   | .04 | .01  | .000 | .794 |
| Social peer victimisation     | -.04 (-.11, .03) | .04 | -.04 | .001 | .276 | .09 (.04, .14)    | .02 | .10  | .004 | .000 | -.07 (-.14, .01) | .04 | -.07 | .002 | .072 | .04 (-.03, .12)   | .04 | .05  | .001 | .278 | -.01 (-.10, .07)  | .04 | -.02 | .000 | .793 |
| Verbal peer victimisation     | -.04 (-.11, .04) | .04 | -.04 | .001 | .314 | .07 (.02, .12)    | .03 | .08  | .002 | .004 | .08 (.00, .15)   | .04 | .08  | .003 | .052 | -.01 (-.09, .07)  | .04 | -.01 | .000 | .791 | .00 (-.08, .09)   | .04 | .01  | .000 | .930 |
| Cyber peer victimisation      | .02 (-.06, .09)  | .04 | .02  | .000 | .682 | .01 (-.04, .07)   | .03 | .01  | .000 | .603 | .00 (-.08, .08)  | .04 | .00  | .000 | .998 | -.04 (-.12, .04)  | .04 | -.04 | .001 | .323 | .03 (-.07, .13)   | .05 | .03  | .000 | .545 |
| Physical peer Perpetration    | .05 (-.02, .12)  | .04 | .05  | .001 | .158 | .06 (.01, .10)    | .03 | .05  | .001 | .029 | .04 (-.03, .12)  | .04 | .04  | .001 | .267 | .00 (-.08, .07)   | .04 | .00  | .000 | .960 | -.07 (-.16, .02)  | .05 | -.07 | .003 | .142 |
| Social peer Perpetration      | .04 (-.02, .10)  | .03 | .04  | .001 | .218 | .03 (-.01, .07)   | .02 | .03  | .000 | .194 | .01 (-.05, .08)  | .03 | .01  | .000 | .681 | -.06 (-.13, .00)  | .03 | -.07 | .003 | .066 | -.07 (-.15, .00)  | .04 | -.09 | .004 | .061 |
| Verbal peer Perpetration      | .00 (-.06, .07)  | .03 | .00  | .000 | .901 | -.05 (-.10, -.01) | .02 | -.06 | .002 | .015 | -.02 (-.08, .05) | .03 | -.02 | .000 | .663 | .03 (-.04, .10)   | .03 | .04  | .001 | .371 | .03 (-.05, .10)   | .04 | .03  | .000 | .517 |
| Cyber peer Perpetration       | -.06 (-.13, .01) | .03 | -.06 | .002 | .070 | .03 (-.02, .07)   | .02 | .03  | .000 | .205 | .02 (-.05, .09)  | .04 | .02  | .000 | .542 | -.01 (-.08, .06)  | .04 | -.01 | .000 | .775 | .02 (-.07, .10)   | .04 | .02  | .000 | .692 |
| Parental role aspirations     | -.03 (-.08, .03) | .03 | -.03 | .000 | .350 | -.02 (-.06, .01)  | .02 | -.03 | .000 | .216 | -.02 (-.08, .04) | .03 | -.02 | .000 | .559 | -.04 (-.10, .02)  | .03 | -.04 | .001 | .196 | .02 (-.05, .09)   | .04 | .02  | .000 | .548 |
| Occupational role aspirations | -.05 (-.11, .01) | .03 | -.05 | .001 | .121 | .03 (-.01, .07)   | .02 | .03  | .001 | .181 | .04 (-.03, .10)  | .03 | .04  | .001 | .252 | .09 (.03, .15)    | .03 | .10  | .006 | .007 | -.02 (-.10, .06)  | .04 | -.02 | .000 | .623 |
| Homecare role aspirations     | .05 (.00, .10)   | .03 | .05  | .002 | .071 | .01 (-.03, .04)   | .02 | .01  | .000 | .653 | -.01 (-.07, .04) | .03 | -.01 | .000 | .623 | -.01 (-.07, .05)  | .03 | -.01 | .000 | .724 | -.06 (-.12, .01)  | .03 | -.07 | .003 | .084 |
| Importance of Relationships   | .04 (-.03, .11)  | .03 | .04  | .001 | .252 | .00 (-.04, .05)   | .02 | .00  | .000 | .881 | -.02 (-.09, .06) | .04 | -.01 | .000 | .680 | .05 (-.02, .12)   | .04 | .05  | .002 | .147 | .01 (-.07, .10)   | .04 | .01  | .000 | .786 |
| Achievement Motivation        | -.04 (-.10, .02) | .03 | -.04 | .001 | .239 | .03 (-.01, .07)   | .02 | .03  | .001 | .120 | .03 (-.04, .09)  | .03 | .03  | .000 | .414 | -.01 (-.08, .05)  | .03 | -.02 | .000 | .659 | .01 (-.06, .09)   | .04 | .01  | .000 | .753 |
| Purpose in Life               | .20 (.14, .27)   | .03 | .19  | .020 | .000 | -.19 (-.23, -.14) | .02 | -.18 | .019 | .000 | -.03 (-.10, .04) | .04 | -.03 | .000 | .454 | .00 (-.07, .07)   | .04 | .00  | .000 | .932 | -.01 (-.09, .08)  | .04 | -.01 | .000 | .865 |

|                                      |                   |     |      |      |      |                   |     |      |      |      |                   |     |      |      |      |                   |     |      |      |      |                   |     |      |      |      |
|--------------------------------------|-------------------|-----|------|------|------|-------------------|-----|------|------|------|-------------------|-----|------|------|------|-------------------|-----|------|------|------|-------------------|-----|------|------|------|
| Importance of democracy and equality | -.04 (-.10, .02)  | .03 | -.04 | .001 | .166 | .01 (-.03, .05)   | .02 | .01  | .000 | .634 | .00 (-.05, .06)   | .03 | .00  | .000 | .882 | .08 (.02, .14)    | .03 | .08  | .005 | .008 | .04 (-.03, .11)   | .04 | .04  | .001 | .264 |
| Environmental concerns               | .05 (.00, .11)    | .03 | .05  | .002 | .069 | -.03 (-.07, .00)  | .02 | -.04 | .001 | .078 | -.02 (-.08, .04)  | .03 | -.02 | .000 | .535 | .07 (.01, .13)    | .03 | .08  | .004 | .017 | .06 (-.02, .13)   | .04 | .06  | .003 | .133 |
| Religiosity                          | .00 (-.06, .05)   | .03 | .00  | .000 | .950 | .05 (.01, .08)    | .02 | .05  | .002 | .010 | .01 (-.05, .07)   | .03 | .01  | .000 | .739 | .06 (.00, .12)    | .03 | .06  | .003 | .038 | .00 (-.06, .07)   | .03 | .00  | .000 | .914 |
| Importance of leisure                | .11 (.05, .17)    | .03 | .11  | .007 | .000 | -.07 (-.11, -.03) | .02 | -.07 | .003 | .001 | -.07 (-.13, .00)  | .03 | -.07 | .003 | .044 | .04 (-.03, .10)   | .03 | .04  | .001 | .242 | .09 (.01, .16)    | .04 | .10  | .006 | .024 |
| Alcohol use                          | -.02 (-.08, .04)  | .03 | -.02 | .000 | .521 | -.01 (-.05, .04)  | .02 | -.01 | .000 | .741 | -.06 (-.13, .01)  | .03 | -.06 | .002 | .070 | .00 (-.07, .06)   | .03 | .00  | .000 | .900 | .03 (-.05, .11)   | .04 | .03  | .001 | .445 |
| Ever smoked                          | -.01 (-.07, .05)  | .03 | -.01 | .000 | .703 | .00 (-.04, .04)   | .02 | .00  | .000 | .855 | -.04 (-.10, .02)  | .03 | -.04 | .001 | .215 | -.05 (-.11, .01)  | .03 | -.06 | .002 | .088 | -.05 (-.12, .02)  | .04 | -.06 | .003 | .144 |
| Ever vaped                           | -.01 (-.06, .04)  | .03 | -.01 | .000 | .656 | .01 (-.03, .04)   | .02 | .01  | .000 | .769 | .09 (.03, .14)    | .03 | .09  | .006 | .002 | -.09 (-.14, -.03) | .03 | -.10 | .008 | .002 | -.03 (-.10, .03)  | .03 | -.04 | .001 | .313 |
| Cognitive enhancers                  | -.05 (-.10, .00)  | .03 | -.06 | .003 | .036 | .02 (-.02, .05)   | .02 | .02  | .000 | .334 | -.02 (-.08, .03)  | .03 | -.03 | .001 | .380 | .07 (.02, .12)    | .03 | .08  | .005 | .011 | .03 (-.03, .09)   | .03 | .04  | .001 | .387 |
| Big 5 Agreeableness                  | .00 (-.05, .05)   | .03 | .00  | .000 | .992 | .04 (.00, .07)    | .02 | .04  | .001 | .055 | -.02 (-.08, .03)  | .03 | -.02 | .000 | .426 | -.05 (-.10, .01)  | .03 | -.05 | .002 | .117 | -.01 (-.08, .05)  | .03 | -.02 | .000 | .682 |
| Big 5 Conscientiousness              | -.04 (-.10, .03)  | .03 | -.03 | .001 | .311 | .06 (.01, .10)    | .02 | .06  | .002 | .018 | -.04 (-.11, .04)  | .04 | -.04 | .001 | .335 | .07 (.00, .14)    | .04 | .08  | .003 | .052 | .06 (-.02, .15)   | .04 | .08  | .003 | .126 |
| Big 5 Extraversion                   | .06 (-.01, .13)   | .04 | .06  | .002 | .089 | -.12 (-.17, -.07) | .02 | -.12 | .007 | .000 | .03 (-.04, .11)   | .04 | .03  | .000 | .413 | -.02 (-.10, .05)  | .04 | -.02 | .000 | .570 | -.11 (-.20, -.03) | .05 | -.13 | .008 | .011 |
| Big 5 Neuroticism                    | -.02 (-.09, .04)  | .03 | -.02 | .000 | .468 | .26 (.22, .31)    | .02 | .27  | .038 | .000 | .13 (.06, .19)    | .04 | .13  | .008 | .000 | -.03 (-.10, .04)  | .04 | -.04 | .001 | .362 | -.04 (-.12, .04)  | .04 | -.05 | .001 | .324 |
| Big 5 Openness                       | -.04 (-.10, .01)  | .03 | -.04 | .001 | .112 | .05 (.01, .09)    | .02 | .05  | .002 | .006 | .01 (-.05, .06)   | .03 | .01  | .000 | .799 | .01 (-.04, .07)   | .03 | .02  | .000 | .636 | .00 (-.06, .07)   | .03 | .00  | .000 | .953 |
| Self-control                         | -.02 (-.09, .05)  | .04 | -.02 | .000 | .542 | -.11 (-.16, -.07) | .02 | -.12 | .007 | .000 | .02 (-.05, .10)   | .04 | .03  | .000 | .510 | -.01 (-.08, .07)  | .04 | -.01 | .000 | .885 | -.08 (-.16, .01)  | .04 | -.09 | .003 | .085 |
| Not planning for the future          | .06 (.01, .12)    | .03 | .07  | .003 | .024 | .07 (.03, .11)    | .02 | .07  | .003 | .001 | -.01 (-.07, .05)  | .03 | -.01 | .000 | .790 | -.01 (-.07, .05)  | .03 | -.01 | .000 | .674 | -.06 (-.12, .01)  | .03 | -.07 | .003 | .112 |
| Ambition                             | .02 (-.04, .09)   | .03 | .02  | .000 | .505 | .00 (-.05, .04)   | .02 | .00  | .000 | .862 | -.04 (-.11, .03)  | .04 | -.04 | .001 | .223 | -.05 (-.12, .03)  | .04 | -.05 | .001 | .214 | .05 (-.04, .13)   | .04 | .06  | .002 | .250 |
| Physical activity                    | .01 (-.05, .06)   | .03 | .01  | .000 | .839 | .05 (.01, .09)    | .02 | .05  | .002 | .016 | -.14 (-.20, -.08) | .03 | -.14 | .014 | .000 | .01 (-.05, .07)   | .03 | .01  | .000 | .667 | .02 (-.05, .09)   | .04 | .02  | .000 | .581 |
| Health behaviours                    | -.07 (-.13, -.02) | .03 | -.07 | .003 | .012 | .00 (-.04, .04)   | .02 | .00  | .000 | .990 | -.01 (-.07, .05)  | .03 | -.01 | .000 | .776 | .08 (.02, .13)    | .03 | .08  | .005 | .010 | .10 (.03, .16)    | .04 | .11  | .009 | .006 |



|                                           |                                                            |             |          |                        |          |                                                            |             |          |                        |          |                                                           |             |          |                        |          |                                                           |             |          |                        |          |                                                          |             |          |                        |          |
|-------------------------------------------|------------------------------------------------------------|-------------|----------|------------------------|----------|------------------------------------------------------------|-------------|----------|------------------------|----------|-----------------------------------------------------------|-------------|----------|------------------------|----------|-----------------------------------------------------------|-------------|----------|------------------------|----------|----------------------------------------------------------|-------------|----------|------------------------|----------|
| Risk taking behaviour                     | -.01 (-.08, .05)                                           | .03         | -.01     | .000                   | .719     | -.02 (-.06, .02)                                           | .02         | -.02     | .000                   | .370     | .04 (-.03, .10)                                           | .04         | .04      | .001                   | .318     | .00 (-.07, .07)                                           | .04         | .00      | .000                   | .974     | -.03 (-.11, .05)                                         | .04         | -.04     | .001                   | .444     |
| Risky sexual behaviour                    | .04 (.02, .07)                                             | .01         | .10      | .007                   | .000     | .00 (-.02, .02)                                            | .01         | .00      | .000                   | .937     | .01 (-.01, .04)                                           | .01         | .03      | .001                   | .363     | .00 (-.02, .03)                                           | .01         | .00      | .000                   | .948     | -.02 (-.05, .01)                                         | .02         | -.06     | .002                   | .155     |
| Media use                                 | .01 (-.05, .07)                                            | .03         | .01      | .000                   | .710     | .03 (-.01, .07)                                            | .02         | .03      | .001                   | .131     | .05 (-.02, .11)                                           | .03         | .04      | .001                   | .142     | -.02 (-.08, .04)                                          | .03         | -.02     | .000                   | .468     | .00 (-.07, .07)                                          | .04         | .00      | .000                   | .981     |
| Volunteering                              | .08 (.02, .13)                                             | .03         | .08      | .004                   | .004     | .00 (-.04, .04)                                            | .02         | .00      | .000                   | .970     | .11 (.05, .16)                                            | .03         | .11      | .009                   | .000     | .02 (-.03, .08)                                           | .03         | .02      | .000                   | .459     | .02 (-.05, .08)                                          | .03         | .02      | .000                   | .614     |
| Internet dating (scale)                   | -.11 (-.16, -.05)                                          | .03         | -.11     | .008                   | .000     | -.05 (-.09, -.02)                                          | .02         | -.06     | .002                   | .005     | .03 (-.02, .09)                                           | .03         | .03      | .001                   | .262     | .12 (.07, .18)                                            | .03         | .14      | .014                   | .000     | .04 (-.02, .11)                                          | .03         | .05      | .002                   | .194     |
| Financial literacy: Knowledge of Products | .09 (.04, .15)                                             | .03         | .09      | .007                   | .000     | .00 (-.03, .04)                                            | .02         | .00      | .000                   | .883     | .04 (-.02, .09)                                           | .03         | .04      | .001                   | .203     | -.04 (-.10, .01)                                          | .03         | -.05     | .002                   | .114     | -.03 (-.10, .04)                                         | .03         | -.04     | .001                   | .366     |
| Financial attitudes and behaviour         | .20 (.14, .26)                                             | .03         | .20      | .024                   | .000     | .05 (.01, .09)                                             | .02         | .05      | .002                   | .018     | -.02 (-.08, .04)                                          | .03         | -.02     | .000                   | .487     | .00 (-.06, .06)                                           | .03         | .00      | .000                   | .969     | -.06 (-.14, .01)                                         | .04         | -.08     | .003                   | .093     |
| Overall model fit                         | $F(56,1061) = 13.06, p < .001, R^2$ (adjusted) = .41 (.38) |             |          |                        |          | $F(56,1050) = 43.65, p < .001, R^2$ (adjusted) = .70 (.68) |             |          |                        |          | $F(56,1052) = 7.80, p < .001, R^2$ (adjusted) = .29 (.26) |             |          |                        |          | $F(56,1058) = 3.87, p < .001, R^2$ (adjusted) = .17 (.13) |             |          |                        |          | $F(56,727) = 2.15, p < .001, R^2$ (adjusted) = .14 (.08) |             |          |                        |          |
| (b)                                       | Males                                                      |             |          |                        |          |                                                            |             |          |                        |          |                                                           |             |          |                        |          |                                                           |             |          |                        |          |                                                          |             |          |                        |          |
|                                           | Wellbeing                                                  |             |          |                        |          | Adverse mental health                                      |             |          |                        |          | Adverse physical health                                   |             |          |                        |          | Achieved educational level                                |             |          |                        |          | Planned educational level                                |             |          |                        |          |
| Trait                                     | <i>B</i>                                                   | <i>SE B</i> | <i>β</i> | <i>sr</i> <sup>2</sup> | <i>p</i> | <i>B</i>                                                   | <i>SE B</i> | <i>β</i> | <i>sr</i> <sup>2</sup> | <i>p</i> | <i>B</i>                                                  | <i>SE B</i> | <i>β</i> | <i>sr</i> <sup>2</sup> | <i>p</i> | <i>B</i>                                                  | <i>SE B</i> | <i>β</i> | <i>sr</i> <sup>2</sup> | <i>p</i> | <i>B</i>                                                 | <i>SE B</i> | <i>β</i> | <i>sr</i> <sup>2</sup> | <i>p</i> |
| Daily hassles                             | -.02 (-.13, .10)                                           | .06         | -.01     | .000                   | .790     | .14 (.08, .21)                                             | .03         | .17      | .017                   | .000     | .07 (-.04, .18)                                           | .05         | .07      | .003                   | .201     | -.06 (-.18, .06)                                          | .06         | -.06     | .002                   | .316     | -.08 (-.21, .06)                                         | .07         | -.08     | .004                   | .259     |
| CHAOS                                     | -.11 (-.22, .00)                                           | .05         | -.10     | .007                   | .043     | .09 (.03, .15)                                             | .03         | .10      | .007                   | .005     | .06 (-.04, .15)                                           | .05         | .06      | .003                   | .240     | .02 (-.09, .13)                                           | .06         | .02      | .000                   | .714     | .11 (-.02, .23)                                          | .06         | .11      | .009                   | .094     |
| Childhood experiences                     | -.10 (-.21, .01)                                           | .06         | -.09     | .005                   | .077     | .00 (-.06, .07)                                            | .03         | .00      | .000                   | .918     | -.10 (-.20, .00)                                          | .05         | -.10     | .008                   | .053     | -.05 (-.16, .07)                                          | .06         | -.05     | .002                   | .404     | .00 (-.13, .13)                                          | .07         | .00      | .000                   | .984     |
| Poor sleep quality                        | -.05 (-.17, .06)                                           | .06         | -.05     | .001                   | .357     | .14 (.08, .21)                                             | .03         | .16      | .018                   | .000     | .12 (.02, .23)                                            | .05         | .13      | .011                   | .019     | .04 (-.08, .15)                                           | .06         | .03      | .001                   | .546     | .01 (-.11, .14)                                          | .06         | .02      | .000                   | .818     |
| Marriage hopes                            | -.03 (-.13, .07)                                           | .05         | -.03     | .000                   | .588     | -.01 (-.07, .05)                                           | .03         | -.01     | .000                   | .775     | .08 (-.01, .17)                                           | .05         | .09      | .006                   | .095     | -.08 (-.19, .02)                                          | .05         | -.08     | .005                   | .127     | -.11 (-.23, .00)                                         | .06         | -.13     | .011                   | .056     |
| Marriage worries                          | .02 (-.08, .11)                                            | .05         | .02      | .000                   | .731     | -.04 (-.10, .02)                                           | .03         | -.05     | .002                   | .177     | -.04 (-.12, .05)                                          | .05         | -.04     | .001                   | .434     | .06 (-.04, .16)                                           | .05         | .06      | .003                   | .256     | .09 (-.03, .20)                                          | .06         | .11      | .007                   | .127     |
| Quality of relationship with twin         | -.04 (-.14, .06)                                           | .05         | -.04     | .001                   | .462     | .02 (-.04, .07)                                            | .03         | .02      | .000                   | .556     | -.01 (-.10, .08)                                          | .05         | -.01     | .000                   | .790     | .04 (-.07, .14)                                           | .05         | .04      | .001                   | .510     | .05 (-.06, .17)                                          | .06         | .06      | .003                   | .359     |

|                                     |                  |     |      |      |      |                   |     |      |      |      |                  |     |      |      |      |                   |     |      |      |      |                   |     |      |      |      |
|-------------------------------------|------------------|-----|------|------|------|-------------------|-----|------|------|------|------------------|-----|------|------|------|-------------------|-----|------|------|------|-------------------|-----|------|------|------|
| Quality of relationship with mother | -.03 (-.14, .08) | .06 | -.03 | .000 | .625 | .01 (-.05, .08)   | .03 | .02  | .000 | .661 | .03 (-.07, .13)  | .05 | .03  | .001 | .583 | -.01 (-.12, .11)  | .06 | -.01 | .000 | .909 | .00 (-.13, .13)   | .07 | .00  | .000 | .966 |
| Quality of relationship with father | .07 (-.05, .20)  | .06 | .07  | .003 | .229 | -.04 (-.11, .03)  | .04 | -.05 | .001 | .229 | -.08 (-.19, .03) | .06 | -.08 | .004 | .178 | -.11 (-.24, .02)  | .06 | -.11 | .006 | .090 | -.09 (-.22, .05)  | .07 | -.10 | .005 | .200 |
| Number of relationships             | -.03 (-.14, .08) | .06 | -.02 | .000 | .607 | .02 (-.05, .09)   | .03 | .02  | .000 | .580 | .01 (-.09, .12)  | .05 | .01  | .000 | .825 | .00 (-.12, .12)   | .06 | .00  | .000 | .958 | -.01 (-.14, .12)  | .07 | -.01 | .000 | .831 |
| Longest relationship                | .07 (-.04, .17)  | .05 | .06  | .003 | .204 | -.01 (-.07, .05)  | .03 | -.01 | .000 | .765 | .02 (-.08, .11)  | .05 | .02  | .000 | .755 | .03 (-.08, .13)   | .05 | .03  | .001 | .620 | .02 (-.10, .13)   | .06 | .02  | .000 | .806 |
| Partner violence                    | -.12 (-.24, .00) | .06 | -.10 | .007 | .046 | .05 (-.02, .12)   | .04 | .05  | .002 | .164 | .07 (-.04, .18)  | .06 | .07  | .003 | .205 | -.11 (-.24, .01)  | .06 | -.10 | .007 | .076 | -.04 (-.18, .10)  | .07 | -.04 | .001 | .572 |
| Contact with mother                 | .14 (-.02, .29)  | .08 | .12  | .005 | .082 | -.04 (-.13, .05)  | .05 | -.05 | .001 | .350 | .00 (-.14, .14)  | .07 | .00  | .000 | .966 | -.22 (-.38, -.06) | .08 | -.21 | .016 | .007 | -.27 (-.45, -.10) | .09 | -.30 | .029 | .003 |
| Communication with mother           | -.03 (-.16, .10) | .07 | -.03 | .000 | .672 | .01 (-.06, .09)   | .04 | .02  | .000 | .701 | -.10 (-.22, .02) | .06 | -.11 | .006 | .096 | .13 (.00, .27)    | .07 | .13  | .008 | .056 | .14 (-.01, .29)   | .08 | .15  | .010 | .074 |
| Contact with father                 | -.03 (-.18, .12) | .08 | -.02 | .000 | .736 | .04 (-.04, .13)   | .04 | .05  | .001 | .311 | .09 (-.04, .23)  | .07 | .10  | .004 | .171 | -.06 (-.22, .10)  | .08 | -.06 | .001 | .467 | .00 (-.16, .17)   | .09 | .00  | .000 | .969 |
| Communication with father           | .03 (-.13, .19)  | .08 | .02  | .000 | .726 | -.06 (-.15, .03)  | .05 | -.06 | .002 | .193 | .03 (-.12, .17)  | .07 | .03  | .000 | .709 | .10 (-.07, .27)   | .09 | .08  | .003 | .248 | .02 (-.17, .21)   | .10 | .01  | .000 | .873 |
| Peer pressure                       | -.02 (-.12, .09) | .05 | -.02 | .000 | .739 | .02 (-.04, .08)   | .03 | .02  | .000 | .595 | .06 (-.04, .15)  | .05 | .06  | .003 | .262 | -.02 (-.13, .09)  | .06 | -.02 | .000 | .776 | -.01 (-.12, .11)  | .06 | -.01 | .000 | .881 |
| Physical peer victimisation         | -.08 (-.19, .03) | .06 | -.10 | .003 | .156 | -.02 (-.08, .04)  | .03 | -.03 | .000 | .538 | .04 (-.06, .14)  | .05 | .06  | .001 | .428 | -.03 (-.14, .09)  | .06 | -.04 | .000 | .643 | -.01 (-.13, .12)  | .06 | -.01 | .000 | .936 |
| Social peer victimisation           | -.02 (-.16, .11) | .07 | -.02 | .000 | .742 | .07 (-.01, .14)   | .04 | .08  | .003 | .100 | .04 (-.09, .16)  | .06 | .04  | .001 | .548 | .01 (-.13, .16)   | .07 | .01  | .000 | .842 | .09 (-.05, .24)   | .07 | .12  | .005 | .200 |
| Verbal peer victimisation           | -.06 (-.18, .07) | .06 | -.06 | .001 | .380 | .04 (-.03, .11)   | .04 | .05  | .001 | .293 | -.02 (-.13, .09) | .06 | -.03 | .000 | .695 | .05 (-.07, .18)   | .07 | .06  | .001 | .406 | -.04 (-.18, .09)  | .07 | -.06 | .001 | .517 |
| Cyber peer victimisation            | -.02 (-.16, .11) | .07 | -.02 | .000 | .740 | .14 (.06, .22)    | .04 | .17  | .011 | .001 | -.05 (-.18, .07) | .06 | -.06 | .001 | .405 | -.02 (-.17, .12)  | .07 | -.02 | .000 | .757 | -.02 (-.18, .14)  | .08 | -.02 | .000 | .797 |
| Physical peer Perpetration          | .10 (.00, .20)   | .05 | .14  | .007 | .046 | .06 (.00, .12)    | .03 | .11  | .004 | .038 | .01 (-.08, .10)  | .05 | .02  | .000 | .789 | .03 (-.08, .13)   | .05 | .04  | .000 | .637 | -.08 (-.19, .04)  | .06 | -.13 | .005 | .194 |
| Social peer Perpetration            | -.04 (-.16, .08) | .06 | -.04 | .001 | .498 | .05 (-.02, .12)   | .04 | .06  | .002 | .127 | -.02 (-.13, .09) | .06 | -.03 | .000 | .675 | -.03 (-.16, .09)  | .06 | -.03 | .001 | .613 | -.02 (-.15, .11)  | .06 | -.02 | .000 | .771 |
| Verbal peer Perpetration            | .07 (-.04, .17)  | .05 | .09  | .003 | .201 | -.08 (-.14, -.02) | .03 | -.13 | .006 | .011 | -.01 (-.11, .08) | .05 | -.02 | .000 | .803 | .05 (-.06, .16)   | .06 | .07  | .002 | .373 | .10 (-.02, .21)   | .06 | .15  | .009 | .092 |
| Cyber peer Perpetration             | -.06 (-.17, .06) | .06 | -.06 | .002 | .331 | -.05 (-.11, .02)  | .03 | -.06 | .002 | .146 | .10 (-.01, .20)  | .05 | .12  | .007 | .068 | -.07 (-.18, .05)  | .06 | -.07 | .003 | .265 | .03 (-.10, .16)   | .07 | .03  | .001 | .662 |

|                                      |                  |     |      |      |      |                   |     |      |      |      |                  |     |      |      |      |                  |     |      |      |      |                   |     |      |      |      |
|--------------------------------------|------------------|-----|------|------|------|-------------------|-----|------|------|------|------------------|-----|------|------|------|------------------|-----|------|------|------|-------------------|-----|------|------|------|
| Parental role aspirations            | .01 (-.10, .12)  | .06 | .01  | .000 | .907 | .01 (-.06, .07)   | .03 | .01  | .000 | .864 | -.02 (-.12, .08) | .05 | -.02 | .000 | .724 | .09 (-.02, .21)  | .06 | .09  | .005 | .112 | .08 (-.05, .20)   | .06 | .08  | .004 | .241 |
| Occupational role aspirations        | -.11 (-.23, .01) | .06 | -.10 | .006 | .071 | .08 (.01, .15)    | .04 | .10  | .005 | .019 | .06 (-.05, .17)  | .06 | .06  | .002 | .278 | .09 (-.03, .22)  | .07 | .09  | .004 | .151 | .13 (-.02, .27)   | .07 | .13  | .009 | .085 |
| Homecare role aspirations            | .08 (-.01, .18)  | .05 | .09  | .005 | .083 | .00 (-.05, .06)   | .03 | .00  | .000 | .944 | -.05 (-.13, .04) | .04 | -.06 | .002 | .282 | -.06 (-.16, .04) | .05 | -.07 | .003 | .228 | -.01 (-.12, .10)  | .06 | -.01 | .000 | .839 |
| Importance of Relationships          | -.06 (-.18, .05) | .06 | -.06 | .002 | .267 | .06 (.00, .13)    | .03 | .08  | .003 | .056 | .08 (-.03, .18)  | .05 | .09  | .004 | .140 | .11 (-.01, .23)  | .06 | .12  | .008 | .060 | .09 (-.05, .22)   | .07 | .10  | .005 | .202 |
| Achievement Motivation               | .04 (-.07, .15)  | .06 | .04  | .001 | .454 | .04 (-.02, .10)   | .03 | .05  | .002 | .207 | -.02 (-.12, .08) | .05 | -.02 | .000 | .716 | .03 (-.09, .14)  | .06 | .03  | .000 | .627 | -.08 (-.20, .05)  | .07 | -.09 | .004 | .251 |
| Purpose in Life                      | .24 (.12, .36)   | .06 | .22  | .026 | .000 | -.12 (-.19, -.05) | .04 | -.14 | .010 | .001 | -.03 (-.13, .08) | .06 | -.03 | .000 | .656 | .03 (-.09, .16)  | .06 | .03  | .001 | .624 | .02 (-.12, .16)   | .07 | .03  | .000 | .759 |
| Importance of democracy and equality | .06 (-.03, .16)  | .05 | .06  | .003 | .212 | -.06 (-.12, -.01) | .03 | -.08 | .005 | .021 | -.01 (-.09, .08) | .04 | -.01 | .000 | .914 | .05 (-.05, .14)  | .05 | .05  | .002 | .365 | .05 (-.07, .16)   | .06 | .06  | .002 | .405 |
| Environmental concerns               | .01 (-.10, .11)  | .05 | .01  | .000 | .915 | -.02 (-.08, .04)  | .03 | -.02 | .000 | .607 | -.04 (-.13, .06) | .05 | -.04 | .001 | .469 | .13 (.02, .24)   | .06 | .14  | .012 | .018 | .12 (-.01, .24)   | .06 | .14  | .011 | .066 |
| Religiosity                          | .06 (-.04, .16)  | .05 | .06  | .002 | .265 | .00 (-.06, .06)   | .03 | .00  | .000 | .976 | -.01 (-.10, .08) | .05 | -.01 | .000 | .821 | .05 (-.06, .16)  | .05 | .05  | .002 | .355 | .05 (-.06, .17)   | .06 | .06  | .002 | .382 |
| Importance of leisure                | .12 (.00, .23)   | .06 | .10  | .007 | .045 | -.06 (-.12, .01)  | .03 | -.06 | .002 | .108 | -.06 (-.16, .05) | .05 | -.06 | .002 | .273 | .06 (-.06, .18)  | .06 | .06  | .002 | .328 | .11 (-.02, .25)   | .07 | .12  | .008 | .104 |
| Alcohol use                          | -.12 (-.24, .00) | .06 | -.11 | .007 | .048 | .02 (-.05, .09)   | .04 | .02  | .000 | .630 | -.05 (-.16, .06) | .06 | -.05 | .001 | .411 | -.04 (-.17, .08) | .06 | -.04 | .001 | .506 | .02 (-.12, .16)   | .07 | .02  | .000 | .784 |
| Ever smoked                          | .03 (-.08, .13)  | .05 | .03  | .000 | .622 | .01 (-.05, .07)   | .03 | .01  | .000 | .712 | .00 (-.10, .09)  | .05 | .00  | .000 | .970 | -.10 (-.21, .01) | .06 | -.11 | .007 | .065 | -.10 (-.22, .02)  | .06 | -.13 | .009 | .085 |
| Ever vaped                           | .00 (-.09, .09)  | .05 | .00  | .000 | .983 | .00 (-.05, .06)   | .03 | .00  | .000 | .929 | .13 (.04, .21)   | .04 | .16  | .017 | .004 | -.10 (-.19, .00) | .05 | -.11 | .008 | .054 | -.11 (-.22, -.01) | .05 | -.15 | .013 | .039 |
| Cognitive enhancers                  | -.04 (-.12, .05) | .04 | -.04 | .001 | .398 | -.01 (-.05, .04)  | .02 | -.01 | .000 | .815 | .00 (-.08, .07)  | .04 | -.01 | .000 | .928 | .10 (.02, .19)   | .04 | .12  | .012 | .019 | .07 (-.02, .16)   | .05 | .10  | .007 | .133 |
| Big 5 Agreeableness                  | .05 (-.04, .15)  | .05 | .06  | .002 | .270 | .03 (-.02, .09)   | .03 | .04  | .001 | .246 | -.08 (-.17, .01) | .04 | -.10 | .007 | .073 | -.06 (-.16, .04) | .05 | -.07 | .003 | .220 | .01 (-.10, .12)   | .06 | .02  | .000 | .815 |
| Big 5 Conscientiousness              | -.03 (-.15, .09) | .06 | -.03 | .000 | .591 | .03 (-.04, .10)   | .04 | .04  | .001 | .368 | .09 (-.02, .20)  | .06 | .11  | .005 | .103 | -.01 (-.13, .12) | .06 | -.01 | .000 | .922 | .01 (-.12, .14)   | .07 | .01  | .000 | .915 |
| Big 5 Extraversion                   | .10 (-.03, .23)  | .07 | .10  | .004 | .116 | -.13 (-.20, -.05) | .04 | -.16 | .011 | .001 | -.03 (-.14, .09) | .06 | -.03 | .000 | .668 | -.02 (-.15, .12) | .07 | -.02 | .000 | .790 | -.12 (-.27, .03)  | .08 | -.14 | .007 | .125 |

|                                           |                                                          |             |         |                        |          |                                                           |             |         |                        |          |                                                          |             |         |                        |          |                                                          |             |         |                        |          |                                                          |             |         |                        |          |
|-------------------------------------------|----------------------------------------------------------|-------------|---------|------------------------|----------|-----------------------------------------------------------|-------------|---------|------------------------|----------|----------------------------------------------------------|-------------|---------|------------------------|----------|----------------------------------------------------------|-------------|---------|------------------------|----------|----------------------------------------------------------|-------------|---------|------------------------|----------|
| Big 5 Neuroticism                         | -0.05 (-.17, .07)                                        | .06         | -.04    | .001                   | .431     | .24 (.17, .31)                                            | .04         | .28     | .041                   | .000     | .26 (.15, .37)                                           | .06         | .28     | .041                   | .000     | -.03 (-.16, .10)                                         | .07         | -.03    | .001                   | .621     | -.17 (-.32, -.02)                                        | .08         | -.18    | .015                   | .031     |
| Big 5 Openness                            | -.03 (-.12, .07)                                         | .05         | -.03    | .001                   | .569     | .03 (-.02, .09)                                           | .03         | .04     | .001                   | .270     | .02 (-.07, .10)                                          | .04         | .02     | .000                   | .726     | -.04 (-.14, .06)                                         | .05         | -.04    | .001                   | .445     | .04 (-.07, .15)                                          | .06         | .05     | .002                   | .461     |
| Self-control                              | -.05 (-.18, .07)                                         | .06         | -.05    | .001                   | .411     | -.09 (-.16, -.02)                                         | .04         | -.11    | .006                   | .014     | .10 (-.02, .21)                                          | .06         | .11     | .006                   | .093     | .03 (-.10, .16)                                          | .07         | .03     | .000                   | .678     | -.05 (-.19, .10)                                         | .07         | -.05    | .001                   | .529     |
| Not planning for the future               | -.01 (-.11, .10)                                         | .05         | -.01    | .000                   | .920     | .05 (-.01, .10)                                           | .03         | .06     | .002                   | .131     | .02 (-.07, .12)                                          | .05         | .03     | .000                   | .627     | .01 (-.09, .12)                                          | .05         | .01     | .000                   | .814     | -.03 (-.14, .08)                                         | .06         | -.04    | .001                   | .616     |
| Ambition                                  | -.08 (-.20, .05)                                         | .06         | -.08    | .003                   | .216     | -.06 (-.13, .01)                                          | .04         | -.08    | .003                   | .094     | .01 (-.11, .12)                                          | .06         | .01     | .000                   | .929     | -.04 (-.17, .09)                                         | .07         | -.04    | .001                   | .573     | .01 (-.14, .16)                                          | .08         | .01     | .000                   | .883     |
| Physical activity                         | -.03 (-.13, .08)                                         | .05         | -.02    | .000                   | .648     | .05 (-.01, .11)                                           | .03         | .07     | .003                   | .090     | -.04 (-.13, .06)                                         | .05         | -.04    | .001                   | .454     | -.10 (-.21, .01)                                         | .06         | -.10    | .006                   | .083     | -.05 (-.18, .07)                                         | .06         | -.06    | .002                   | .402     |
| Health behaviours                         | -.14 (-.24, -.05)                                        | .05         | -.14    | .014                   | .004     | -.07 (-.13, -.01)                                         | .03         | -.09    | .006                   | .015     | -.10 (-.19, -.01)                                        | .05         | -.12    | .009                   | .033     | .12 (.02, .22)                                           | .05         | .13     | .011                   | .022     | .15 (.04, .26)                                           | .06         | .18     | .023                   | .007     |
| Risk taking behaviour                     | .00 (-.11, .12)                                          | .06         | .00     | .000                   | .944     | .01 (-.05, .08)                                           | .03         | .02     | .000                   | .704     | .09 (-.01, .20)                                          | .05         | .12     | .006                   | .074     | -.04 (-.16, .07)                                         | .06         | -.05    | .001                   | .468     | -.03 (-.16, .10)                                         | .07         | -.04    | .001                   | .625     |
| Risky sexual behaviour                    | .07 (.02, .11)                                           | .02         | .16     | .016                   | .002     | .01 (-.01, .04)                                           | .01         | .04     | .001                   | .294     | .02 (-.02, .06)                                          | .02         | .06     | .002                   | .322     | -.01 (-.05, .04)                                         | .02         | -.02    | .000                   | .780     | .00 (-.05, .05)                                          | .03         | .01     | .000                   | .947     |
| Media use                                 | .02 (-.09, .12)                                          | .05         | .02     | .000                   | .731     | .05 (-.01, .11)                                           | .03         | .06     | .002                   | .110     | .02 (-.08, .11)                                          | .05         | .02     | .000                   | .719     | -.06 (-.17, .04)                                         | .06         | -.07    | .003                   | .241     | -.09 (-.22, .03)                                         | .06         | -.11    | .007                   | .125     |
| Volunteering                              | .06 (-.04, .16)                                          | .05         | .06     | .002                   | .245     | .04 (-.02, .10)                                           | .03         | .05     | .001                   | .210     | .10 (.01, .19)                                           | .05         | .11     | .009                   | .033     | .01 (-.09, .12)                                          | .05         | .01     | .000                   | .815     | -.07 (-.19, .04)                                         | .06         | -.08    | .005                   | .209     |
| Internet dating (scale)                   | -.09 (-.19, .02)                                         | .05         | -.09    | .005                   | .096     | -.04 (-.10, .02)                                          | .03         | -.06    | .002                   | .140     | -.02 (-.11, .08)                                         | .05         | -.02    | .000                   | .723     | .22 (.12, .33)                                           | .06         | .23     | .035                   | .000     | .09 (-.03, .21)                                          | .06         | .11     | .007                   | .139     |
| Financial literacy: Knowledge of Products | .11 (.02, .20)                                           | .05         | .11     | .009                   | .022     | -.01 (-.06, .05)                                          | .03         | -.01    | .000                   | .857     | .03 (-.06, .12)                                          | .04         | .04     | .001                   | .512     | -.05 (-.15, .05)                                         | .05         | -.06    | .002                   | .286     | -.06 (-.18, .05)                                         | .06         | -.08    | .004                   | .267     |
| Financial attitudes and behaviour         | .19 (.08, .30)                                           | .06         | .20     | .020                   | .001     | .05 (-.01, .12)                                           | .03         | .07     | .003                   | .104     | -.02 (-.12, .08)                                         | .05         | -.02    | .000                   | .724     | .01 (-.10, .13)                                          | .06         | .01     | .000                   | .836     | -.02 (-.16, .11)                                         | .07         | -.03    | .000                   | .730     |
| Overall model fit                         | $F(56,347) = 4.25, p < .001, R^2$ (adjusted) = .41 (.31) |             |         |                        |          | $F(56,341) = 12.94, p < .001, R^2$ (adjusted) = .68 (.63) |             |         |                        |          | $F(56,342) = 2.77, p < .001, R^2$ (adjusted) = .31 (.20) |             |         |                        |          | $F(56,346) = 2.17, p < .001, R^2$ (adjusted) = .26 (.14) |             |         |                        |          | $F(56,223) = 1.79, p = .002, R^2$ (adjusted) = .31 (.14) |             |         |                        |          |
| (c)                                       | Females                                                  |             |         |                        |          |                                                           |             |         |                        |          |                                                          |             |         |                        |          |                                                          |             |         |                        |          |                                                          |             |         |                        |          |
|                                           | Wellbeing                                                |             |         |                        |          | Adverse mental health                                     |             |         |                        |          | Adverse physical health                                  |             |         |                        |          | Achieved educational level                               |             |         |                        |          | Planned educational level                                |             |         |                        |          |
| Trait                                     | <i>B</i>                                                 | <i>SE B</i> | $\beta$ | <i>sr</i> <sup>2</sup> | <i>p</i> | <i>B</i>                                                  | <i>SE B</i> | $\beta$ | <i>sr</i> <sup>2</sup> | <i>p</i> | <i>B</i>                                                 | <i>SE B</i> | $\beta$ | <i>sr</i> <sup>2</sup> | <i>p</i> | <i>B</i>                                                 | <i>SE B</i> | $\beta$ | <i>sr</i> <sup>2</sup> | <i>p</i> | <i>B</i>                                                 | <i>SE B</i> | $\beta$ | <i>sr</i> <sup>2</sup> | <i>p</i> |

|                                     |                   |     |      |      |      |                  |     |      |      |      |                  |     |      |      |      |                   |     |      |      |      |                   |     |      |      |      |
|-------------------------------------|-------------------|-----|------|------|------|------------------|-----|------|------|------|------------------|-----|------|------|------|-------------------|-----|------|------|------|-------------------|-----|------|------|------|
| Daily hassles                       | -.08 (-.15, -.01) | .04 | -.08 | .004 | .035 | .15 (.10, .21)   | .03 | .14  | .013 | .000 | .07 (-.01, .16)  | .04 | .07  | .003 | .081 | .06 (-.02, .14)   | .04 | .07  | .003 | .117 | .02 (-.08, .12)   | .05 | .03  | .000 | .657 |
| CHAOS                               | -.12 (-.18, -.05) | .03 | -.12 | .011 | .000 | .06 (.01, .10)   | .02 | .06  | .003 | .013 | .11 (.04, .18)   | .04 | .11  | .009 | .003 | -.03 (-.10, .04)  | .03 | -.04 | .001 | .362 | -.05 (-.13, .04)  | .04 | -.06 | .002 | .279 |
| Childhood experiences               | -.04 (-.11, .03)  | .03 | -.04 | .001 | .259 | .07 (.02, .12)   | .03 | .07  | .003 | .004 | .08 (.01, .16)   | .04 | .08  | .004 | .034 | .04 (-.03, .11)   | .04 | .05  | .001 | .273 | .05 (-.04, .13)   | .04 | .06  | .002 | .301 |
| Poor sleep quality                  | -.03 (-.10, .04)  | .04 | -.03 | .001 | .390 | .18 (.13, .23)   | .03 | .18  | .020 | .000 | .25 (.17, .33)   | .04 | .24  | .037 | .000 | .01 (-.07, .08)   | .04 | .01  | .000 | .879 | .01 (-.08, .10)   | .05 | .01  | .000 | .865 |
| Marriage hopes                      | .02 (-.05, .08)   | .03 | .02  | .000 | .601 | .03 (-.02, .07)  | .02 | .03  | .000 | .266 | .01 (-.06, .08)  | .04 | .01  | .000 | .818 | .07 (.01, .14)    | .03 | .09  | .006 | .031 | .06 (-.02, .14)   | .04 | .07  | .004 | .154 |
| Marriage worries                    | -.06 (-.13, .01)  | .04 | -.06 | .003 | .068 | -.02 (-.07, .03) | .03 | -.02 | .000 | .441 | .04 (-.04, .12)  | .04 | .04  | .001 | .326 | -.02 (-.09, .06)  | .04 | -.02 | .000 | .684 | -.02 (-.11, .07)  | .05 | -.03 | .000 | .615 |
| Quality of relationship with twin   | .03 (-.04, .09)   | .03 | .03  | .001 | .387 | .02 (-.03, .07)  | .02 | .02  | .000 | .416 | -.01 (-.08, .06) | .04 | -.01 | .000 | .817 | -.02 (-.08, .05)  | .03 | -.02 | .000 | .628 | -.02 (-.11, .06)  | .04 | -.03 | .001 | .582 |
| Quality of relationship with mother | .05 (-.01, .12)   | .03 | .06  | .002 | .108 | .01 (-.04, .05)  | .02 | .01  | .000 | .775 | .06 (-.01, .14)  | .04 | .07  | .003 | .089 | -.03 (-.10, .04)  | .04 | -.04 | .001 | .421 | .01 (-.08, .09)   | .04 | .01  | .000 | .883 |
| Quality of relationship with father | .07 (.00, .15)    | .04 | .08  | .003 | .050 | -.06 (-.11, .00) | .03 | -.06 | .002 | .034 | .01 (-.07, .10)  | .04 | .01  | .000 | .734 | -.05 (-.13, .03)  | .04 | -.06 | .002 | .200 | .00 (-.10, .11)   | .05 | .01  | .000 | .931 |
| Number of relationships             | .08 (.00, .17)    | .04 | .06  | .003 | .048 | .05 (-.01, .11)  | .03 | .04  | .001 | .087 | .05 (-.04, .14)  | .05 | .04  | .001 | .279 | .03 (-.07, .12)   | .05 | .02  | .000 | .589 | .02 (-.09, .13)   | .06 | .02  | .000 | .731 |
| Longest relationship                | .08 (.01, .15)    | .04 | .08  | .004 | .022 | .07 (.02, .12)   | .03 | .06  | .003 | .010 | .14 (.06, .22)   | .04 | .13  | .012 | .000 | .00 (-.07, .08)   | .04 | .00  | .000 | .979 | -.03 (-.12, .07)  | .05 | -.03 | .001 | .573 |
| Partner violence                    | -.07 (-.13, -.01) | .03 | -.08 | .004 | .027 | .09 (.05, .13)   | .02 | .10  | .007 | .000 | .06 (-.01, .13)  | .03 | .06  | .003 | .089 | -.05 (-.12, .01)  | .03 | -.07 | .003 | .106 | -.02 (-.10, .06)  | .04 | -.03 | .000 | .609 |
| Contact with mother                 | .06 (-.04, .15)   | .05 | .05  | .001 | .237 | -.01 (-.07, .06) | .03 | -.01 | .000 | .877 | -.08 (-.18, .03) | .05 | -.07 | .002 | .153 | -.13 (-.22, -.03) | .05 | -.15 | .008 | .011 | -.18 (-.31, -.05) | .07 | -.21 | .014 | .007 |
| Communication with mother           | -.03 (-.11, .06)  | .04 | -.02 | .000 | .580 | .00 (-.06, .07)  | .03 | .00  | .000 | .943 | .06 (-.04, .16)  | .05 | .05  | .001 | .235 | .00 (-.10, .09)   | .05 | .00  | .000 | .946 | .04 (-.08, .15)   | .06 | .04  | .001 | .515 |
| Contact with father                 | -.02 (-.11, .07)  | .05 | -.02 | .000 | .660 | -.02 (-.08, .05) | .03 | -.02 | .000 | .663 | .04 (-.07, .14)  | .05 | .04  | .001 | .466 | .01 (-.08, .11)   | .05 | .02  | .000 | .791 | .02 (-.11, .15)   | .07 | .02  | .000 | .805 |
| Communication with father           | -.07 (-.18, .03)  | .05 | -.06 | .002 | .163 | .04 (-.04, .12)  | .04 | .03  | .000 | .317 | -.03 (-.15, .09) | .06 | -.03 | .000 | .593 | .09 (-.02, .20)   | .06 | .08  | .003 | .112 | .00 (-.14, .14)   | .07 | .00  | .000 | .978 |
| Peer pressure                       | -.02 (-.09, .05)  | .03 | -.02 | .000 | .544 | .03 (-.02, .07)  | .03 | .02  | .000 | .312 | .02 (-.05, .10)  | .04 | .02  | .000 | .545 | .06 (-.01, .13)   | .04 | .07  | .004 | .082 | -.03 (-.12, .05)  | .05 | -.04 | .001 | .457 |
| Physical peer victimisation         | .06 (-.03, .15)   | .05 | .04  | .001 | .181 | -.02 (-.09, .04) | .03 | -.02 | .000 | .510 | -.05 (-.15, .05) | .05 | -.04 | .001 | .337 | .02 (-.07, .12)   | .05 | .02  | .000 | .648 | -.01 (-.12, .11)  | .06 | -.01 | .000 | .880 |

|                                      |                   |     |      |      |      |                   |     |      |      |      |                  |     |      |      |      |                   |     |      |      |      |                  |     |      |      |      |
|--------------------------------------|-------------------|-----|------|------|------|-------------------|-----|------|------|------|------------------|-----|------|------|------|-------------------|-----|------|------|------|------------------|-----|------|------|------|
| Social peer victimisation            | -.05 (-.14, .04)  | .04 | -.05 | .001 | .247 | .11 (.04, .17)    | .03 | .11  | .004 | .001 | -.09 (-.19, .00) | .05 | -.10 | .004 | .057 | .05 (-.04, .14)   | .05 | .06  | .002 | .259 | -.07 (-.18, .05) | .06 | -.09 | .003 | .242 |
| Verbal peer victimisation            | -.02 (-.11, .07)  | .05 | -.02 | .000 | .705 | .11 (.05, .18)    | .03 | .11  | .004 | .001 | .14 (.04, .24)   | .05 | .13  | .007 | .009 | -.07 (-.16, .03)  | .05 | -.08 | .002 | .182 | .03 (-.09, .15)  | .06 | .03  | .000 | .651 |
| Cyber peer victimisation             | .03 (-.07, .12)   | .05 | .02  | .000 | .603 | -.07 (-.14, .00)  | .04 | -.06 | .002 | .053 | .01 (-.10, .12)  | .06 | .01  | .000 | .865 | -.03 (-.13, .07)  | .05 | -.03 | .000 | .587 | .09 (-.04, .22)  | .07 | .10  | .003 | .182 |
| Physical peer Perpetration           | .01 (-.16, .18)   | .09 | .00  | .000 | .916 | .07 (-.06, .19)   | .06 | .02  | .000 | .297 | -.05 (-.24, .15) | .10 | -.02 | .000 | .651 | .13 (-.06, .31)   | .09 | .05  | .002 | .180 | -.03 (-.26, .21) | .12 | -.01 | .000 | .817 |
| Social peer Perpetration             | .07 (-.01, .15)   | .04 | .07  | .003 | .066 | .02 (-.04, .07)   | .03 | .02  | .000 | .564 | .00 (-.09, .09)  | .05 | .00  | .000 | .946 | -.06 (-.14, .03)  | .04 | -.07 | .002 | .171 | -.08 (-.18, .02) | .05 | -.10 | .005 | .106 |
| Verbal peer Perpetration             | -.03 (-.11, .05)  | .04 | -.03 | .000 | .491 | -.03 (-.09, .03)  | .03 | -.03 | .000 | .280 | .00 (-.10, .09)  | .05 | .00  | .000 | .993 | .00 (-.09, .09)   | .05 | .00  | .000 | .980 | -.04 (-.15, .08) | .06 | -.04 | .001 | .528 |
| Cyber peer Perpetration              | -.05 (-.14, .04)  | .05 | -.04 | .001 | .244 | .08 (.01, .14)    | .03 | .06  | .002 | .023 | .00 (-.10, .10)  | .05 | .00  | .000 | .942 | .02 (-.08, .11)   | .05 | .02  | .000 | .725 | .00 (-.11, .12)  | .06 | .00  | .000 | .945 |
| Parental role aspirations            | -.04 (-.10, .03)  | .03 | -.04 | .001 | .247 | -.03 (-.08, .02)  | .03 | -.03 | .001 | .210 | -.02 (-.10, .05) | .04 | -.02 | .000 | .543 | -.10 (-.17, -.03) | .04 | -.11 | .009 | .007 | .02 (-.08, .11)  | .05 | .02  | .000 | .728 |
| Occupational role aspirations        | -.02 (-.09, .05)  | .04 | -.02 | .000 | .579 | .00 (-.05, .05)   | .03 | .00  | .000 | .985 | .04 (-.04, .12)  | .04 | .04  | .001 | .366 | .09 (.01, .16)    | .04 | .10  | .006 | .026 | -.06 (-.16, .04) | .05 | -.07 | .003 | .217 |
| Homecare role aspirations            | .05 (-.02, .12)   | .03 | .05  | .002 | .130 | .00 (-.05, .05)   | .03 | .00  | .000 | .886 | -.01 (-.08, .07) | .04 | -.01 | .000 | .854 | .01 (-.06, .09)   | .04 | .02  | .000 | .707 | -.09 (-.18, .00) | .05 | -.10 | .007 | .047 |
| Importance of Relationships          | .09 (.01, .18)    | .05 | .08  | .003 | .037 | -.03 (-.09, .04)  | .03 | -.02 | .000 | .410 | -.09 (-.18, .01) | .05 | -.07 | .003 | .092 | .03 (-.07, .12)   | .05 | .03  | .000 | .580 | -.03 (-.14, .09) | .06 | -.02 | .000 | .678 |
| Achievement Motivation               | -.06 (-.14, .01)  | .04 | -.06 | .002 | .102 | .03 (-.03, .08)   | .03 | .03  | .000 | .301 | .07 (-.02, .16)  | .04 | .06  | .003 | .106 | -.06 (-.14, .02)  | .04 | -.07 | .003 | .118 | .02 (-.08, .12)  | .05 | .03  | .000 | .654 |
| Purpose in Life                      | .18 (.10, .26)    | .04 | .17  | .015 | .000 | -.22 (-.28, -.16) | .03 | -.20 | .021 | .000 | -.06 (-.16, .03) | .05 | -.06 | .002 | .176 | .00 (-.08, .09)   | .05 | .00  | .000 | .934 | .00 (-.11, .11)  | .06 | .00  | .000 | .989 |
| Importance of democracy and equality | -.10 (-.17, -.03) | .04 | -.09 | .006 | .007 | .05 (-.01, .10)   | .03 | .04  | .001 | .078 | .02 (-.06, .10)  | .04 | .02  | .000 | .662 | .10 (.02, .18)    | .04 | .10  | .007 | .014 | .02 (-.08, .12)  | .05 | .02  | .000 | .687 |
| Environmental concerns               | .06 (-.01, .13)   | .04 | .06  | .002 | .098 | -.04 (-.09, .01)  | .03 | -.04 | .001 | .125 | -.02 (-.10, .06) | .04 | -.02 | .000 | .618 | .04 (-.04, .11)   | .04 | .04  | .001 | .322 | .03 (-.07, .13)  | .05 | .03  | .001 | .577 |
| Religiosity                          | -.03 (-.09, .03)  | .03 | -.03 | .001 | .349 | .06 (.01, .11)    | .02 | .05  | .002 | .016 | .00 (-.08, .07)  | .04 | .00  | .000 | .924 | .06 (-.01, .13)   | .04 | .07  | .004 | .070 | .01 (-.08, .09)  | .04 | .01  | .000 | .852 |
| Importance of leisure                | .11 (.04, .18)    | .04 | .11  | .007 | .003 | -.06 (-.11, .00)  | .03 | -.05 | .002 | .039 | -.06 (-.15, .02) | .04 | -.06 | .002 | .125 | .02 (-.06, .09)   | .04 | .02  | .000 | .705 | .06 (-.03, .16)  | .05 | .07  | .003 | .211 |
| Alcohol use                          | .05 (-.03, .12)   | .04 | .04  | .001 | .230 | -.02 (-.07, .04)  | .03 | -.01 | .000 | .601 | -.06 (-.14, .03) | .04 | -.05 | .002 | .205 | -.02 (-.10, .07)  | .04 | -.02 | .000 | .689 | .02 (-.08, .11)  | .05 | .02  | .000 | .760 |

|                             |                   |     |      |      |      |                   |     |      |      |      |                   |     |      |      |      |                   |     |      |      |      |                  |     |      |      |      |
|-----------------------------|-------------------|-----|------|------|------|-------------------|-----|------|------|------|-------------------|-----|------|------|------|-------------------|-----|------|------|------|------------------|-----|------|------|------|
| Ever smoked                 | -.04 (-.11, .03)  | .04 | -.04 | .001 | .277 | .00 (-.05, .05)   | .03 | .00  | .000 | .927 | -.05 (-.13, .02)  | .04 | -.05 | .002 | .169 | -.02 (-.10, .05)  | .04 | -.03 | .000 | .530 | -.03 (-.12, .07) | .05 | -.03 | .001 | .585 |
| Ever vaped                  | -.02 (-.08, .05)  | .03 | -.02 | .000 | .562 | .00 (-.05, .04)   | .02 | .00  | .000 | .882 | .06 (-.02, .13)   | .04 | .06  | .002 | .130 | -.08 (-.15, -.01) | .04 | -.10 | .007 | .020 | -.01 (-.09, .08) | .04 | -.01 | .000 | .860 |
| Cognitive enhancers         | -.08 (-.15, -.02) | .03 | -.09 | .005 | .012 | .03 (-.02, .07)   | .02 | .03  | .000 | .269 | -.07 (-.15, .00)  | .04 | -.07 | .004 | .054 | .04 (-.03, .11)   | .04 | .05  | .001 | .277 | .02 (-.07, .10)  | .04 | .02  | .000 | .712 |
| Big 5 Agreeableness         | -.03 (-.10, .04)  | .04 | -.03 | .001 | .408 | .04 (-.01, .10)   | .03 | .04  | .001 | .087 | .04 (-.03, .12)   | .04 | .04  | .001 | .267 | -.06 (-.13, .02)  | .04 | -.06 | .003 | .130 | -.04 (-.13, .05) | .05 | -.04 | .001 | .417 |
| Big 5 Conscientiousness     | -.04 (-.12, .05)  | .04 | -.04 | .001 | .370 | .04 (-.02, .11)   | .03 | .04  | .001 | .161 | -.14 (-.23, -.04) | .05 | -.13 | .008 | .005 | .10 (.01, .19)    | .05 | .11  | .006 | .027 | .11 (-.01, .22)  | .06 | .12  | .006 | .066 |
| Big 5 Extraversion          | -.01 (-.09, .08)  | .04 | -.01 | .000 | .856 | -.13 (-.19, -.07) | .03 | -.12 | .006 | .000 | .08 (-.02, .18)   | .05 | .07  | .003 | .105 | .02 (-.08, .11)   | .05 | .02  | .000 | .743 | -.08 (-.20, .03) | .06 | -.09 | .004 | .146 |
| Big 5 Neuroticism           | -.05 (-.13, .03)  | .04 | -.05 | .001 | .204 | .25 (.19, .31)    | .03 | .24  | .027 | .000 | .07 (-.02, .16)   | .05 | .07  | .002 | .129 | -.05 (-.14, .04)  | .04 | -.06 | .002 | .250 | -.01 (-.11, .10) | .05 | -.01 | .000 | .911 |
| Big 5 Openness              | -.04 (-.11, .03)  | .03 | -.04 | .001 | .234 | .05 (.00, .10)    | .03 | .05  | .002 | .044 | .02 (-.06, .10)   | .04 | .02  | .000 | .594 | .03 (-.05, .10)   | .04 | .03  | .001 | .495 | .00 (-.09, .09)  | .05 | .00  | .000 | .942 |
| Self-control                | -.03 (-.12, .05)  | .04 | -.03 | .000 | .457 | -.12 (-.19, -.06) | .03 | -.12 | .006 | .000 | -.02 (-.11, .08)  | .05 | -.02 | .000 | .698 | -.03 (-.12, .06)  | .05 | -.03 | .000 | .549 | -.10 (-.22, .01) | .06 | -.12 | .006 | .079 |
| Not planning for the future | .09 (.02, .15)    | .04 | .09  | .005 | .015 | .08 (.03, .13)    | .03 | .07  | .004 | .003 | -.04 (-.11, .04)  | .04 | -.03 | .001 | .375 | -.03 (-.11, .04)  | .04 | -.04 | .001 | .378 | -.07 (-.16, .02) | .05 | -.09 | .005 | .113 |
| Ambition                    | .08 (.00, .16)    | .04 | .08  | .003 | .042 | .03 (-.03, .08)   | .03 | .02  | .000 | .409 | -.06 (-.15, .03)  | .05 | -.06 | .002 | .212 | -.05 (-.13, .04)  | .04 | -.05 | .001 | .288 | .07 (-.04, .17)  | .05 | .07  | .003 | .218 |
| Physical activity           | .04 (-.03, .11)   | .04 | .04  | .001 | .289 | .04 (-.02, .09)   | .03 | .03  | .001 | .170 | -.20 (-.28, -.12) | .04 | -.18 | .023 | .000 | .07 (-.01, .14)   | .04 | .07  | .004 | .083 | .06 (-.04, .15)  | .05 | .07  | .003 | .222 |
| Health behaviours           | -.03 (-.09, .04)  | .03 | -.03 | .000 | .461 | .04 (-.01, .09)   | .03 | .04  | .001 | .141 | .04 (-.04, .11)   | .04 | .04  | .001 | .345 | .05 (-.03, .12)   | .04 | .06  | .002 | .199 | .07 (-.02, .16)  | .05 | .08  | .004 | .150 |
| Risk taking behaviour       | -.05 (-.13, .03)  | .04 | -.05 | .001 | .241 | -.05 (-.11, .01)  | .03 | -.04 | .001 | .131 | .01 (-.08, .10)   | .05 | .01  | .000 | .806 | .03 (-.06, .12)   | .05 | .03  | .001 | .513 | -.03 (-.14, .08) | .05 | -.03 | .001 | .589 |
| Risky sexual behaviour      | .03 (.00, .06)    | .02 | .07  | .003 | .059 | -.01 (-.03, .02)  | .01 | -.01 | .000 | .597 | .01 (-.02, .04)   | .02 | .03  | .000 | .490 | .01 (-.02, .04)   | .02 | .04  | .001 | .421 | -.03 (-.06, .02) | .02 | -.07 | .003 | .217 |
| Media use                   | .00 (-.07, .07)   | .04 | .00  | .000 | .950 | .01 (-.04, .07)   | .03 | .01  | .000 | .653 | .06 (-.03, .14)   | .04 | .05  | .002 | .188 | -.01 (-.09, .07)  | .04 | -.01 | .000 | .811 | .04 (-.06, .14)  | .05 | .04  | .001 | .414 |
| Volunteering                | .09 (.03, .15)    | .03 | .10  | .007 | .004 | -.02 (-.06, .03)  | .02 | -.02 | .000 | .526 | .10 (.03, .17)    | .04 | .10  | .007 | .007 | .03 (-.04, .10)   | .03 | .03  | .001 | .404 | .06 (-.02, .14)  | .04 | .07  | .004 | .154 |
| Internet dating (scale)     | -.09 (-.15, -.03) | .03 | -.10 | .006 | .005 | -.05 (-.09, .00)  | .02 | -.05 | .002 | .045 | .05 (-.02, .12)   | .04 | .05  | .002 | .199 | .07 (.01, .14)    | .03 | .09  | .006 | .033 | .01 (-.08, .09)  | .04 | .01  | .000 | .851 |

|                                           |                                                          |     |     |      |      |                                                           |     |      |      |      |                                                          |     |      |      |      |                                                          |     |      |      |      |                                                          |     |      |      |      |
|-------------------------------------------|----------------------------------------------------------|-----|-----|------|------|-----------------------------------------------------------|-----|------|------|------|----------------------------------------------------------|-----|------|------|------|----------------------------------------------------------|-----|------|------|------|----------------------------------------------------------|-----|------|------|------|
| Financial literacy: Knowledge of Products | .07 (.01, .14)                                           | .03 | .07 | .004 | .025 | -.01 (-.06, .04)                                          | .02 | -.01 | .000 | .607 | .01 (-.06, .08)                                          | .04 | .01  | .000 | .768 | -.03 (-.10, .04)                                         | .04 | -.04 | .001 | .332 | .01 (-.08, .09)                                          | .04 | .01  | .000 | .881 |
| Financial attitudes and behaviour         | .20 (.13, .27)                                           | .04 | .19 | .024 | .000 | .06 (.01, .11)                                            | .03 | .06  | .002 | .025 | -.01 (-.09, .07)                                         | .04 | -.01 | .000 | .829 | .00 (-.08, .07)                                          | .04 | -.01 | .000 | .910 | -.09 (-.18, .01)                                         | .05 | -.10 | .005 | .089 |
| Overall model fit                         | $F(56,657) = 1.51, p < .001, R^2$ (adjusted) = .47 (.43) |     |     |      |      | $F(56,652) = 32.82, p < .001, R^2$ (adjusted) = .74 (.72) |     |      |      |      | $F(56,653) = 6.60, p < .001, R^2$ (adjusted) = .36 (.31) |     |      |      |      | $F(56,655) = 2.92, p < .001, R^2$ (adjusted) = .20 (.13) |     |      |      |      | $F(56,447) = 1.49, p = .016, R^2$ (adjusted) = .16 (.05) |     |      |      |      |

Note. Scores were corrected for mean age and sex differences (see Methods). These results are based on one twin randomly selected from each pair so that the data points are independent.

Note. The binary (yes/no) internet dating variable was excluded from these analyses as it formed part of the internet dating scale variable.



**Table S8.** Twin intraclass correlations and Falconer ACE estimates, and model fitting results for univariate analyses of additive genetic (A), shared environmental (C), and non-shared environmental (E) components of variance for variables for psychological traits and functional outcomes (95% confidence intervals are in parentheses). (a) for the whole sample; (b) males only; (c) females only; (d) MZ and DZ same sex twin pairs (opposite sex DZ twins excluded).

(a)

| Trait                               | MZ               |          |          | DZ <sup>a</sup>   |          |          | Falconer ACE estimates |     |     |
|-------------------------------------|------------------|----------|----------|-------------------|----------|----------|------------------------|-----|-----|
|                                     | <i>r</i>         | <i>p</i> | <i>n</i> | <i>r</i>          | <i>p</i> | <i>n</i> | A                      | C   | E   |
| Daily hassles                       | .31<br>(.26,.36) | <.001    | 1376     | .15<br>(.10, .19) | <.001    | 2050     | .31 <sup>b</sup>       | .00 | .69 |
| CHAOS                               | .40<br>(.36,.44) | <.001    | 1588     | .36<br>(.32, .39) | <.001    | 2516     | .07                    | .32 | .61 |
| Childhood experiences               | .66<br>(.63,.69) | <.001    | 1367     | .40<br>(.36, .43) | <.001    | 2039     | .52                    | .14 | .34 |
| Poor sleep quality                  | .31<br>(.26,.36) | <.001    | 1334     | .15<br>(.11, .20) | <.001    | 2001     | .31 <sup>b</sup>       | .00 | .69 |
| Marriage hopes                      | .28<br>(.23,.33) | <.001    | 1550     | .18<br>(.14, .22) | <.001    | 2417     | .19                    | .09 | .73 |
| Marriage worries                    | .38<br>(.34,.42) | <.001    | 1549     | .19<br>(.15, .23) | <.001    | 2418     | .37                    | .01 | .62 |
| Quality of relationship with twin   | .69<br>(.66,.72) | <.001    | 1497     | .62<br>(.59, .64) | <.001    | 2339     | .14                    | .55 | .31 |
| Quality of relationship with mother | .53<br>(.49,.57) | <.001    | 1478     | .26<br>(.22, .29) | <.001    | 2308     | .53 <sup>b</sup>       | .00 | .47 |
| Quality of relationship with father | .61<br>(.58,.64) | <.001    | 1422     | .41<br>(.38, .44) | <.001    | 2229     | .39                    | .22 | .39 |
| Number of relationships             | .46<br>(.42,.50) | <.001    | 1548     | .19<br>(.15, .23) | <.001    | 2416     | .46 <sup>b</sup>       | .00 | .54 |
| Longest relationship                | .32<br>(.27,.37) | <.001    | 1152     | .08<br>(.03, .12) | .002     | 1736     | .32 <sup>b</sup>       | .00 | .68 |
| Partner violence                    | .25<br>(.20,.30) | <.001    | 1457     | .12<br>(.07, .16) | <.001    | 2264     | .25 <sup>b</sup>       | .00 | .75 |
| Contact with mother                 | .55<br>(.48,.61) | <.001    | 426      | .30<br>(.22, .37) | <.001    | 559      | .50                    | .05 | .45 |

|                               |                  |       |      |                    |       |      |                  |     |     |
|-------------------------------|------------------|-------|------|--------------------|-------|------|------------------|-----|-----|
| Communication with mother     | .64<br>(.58,.69) | <.001 | 440  | .38<br>(.30, .45)  | <.001 | 574  | .54              | .11 | .36 |
| Contact with father           | .50<br>(.43,.56) | <.001 | 511  | .40<br>(.33, .46)  | <.001 | 694  | .21              | .29 | .50 |
| Communication with father     | .73<br>(.69,.77) | <.001 | 575  | .64<br>(.59, .68)  | <.001 | 764  | .18              | .54 | .27 |
| Peer pressure                 | .35<br>(.30,.39) | <.001 | 1494 | .16<br>(.12, .19)  | <.001 | 2371 | .35 <sup>b</sup> | .00 | .65 |
| Physical peer victimisation   | .20<br>(.15,.25) | <.001 | 1308 | .02<br>(-.03, .06) | .417  | 1935 | .20 <sup>b</sup> | .00 | .80 |
| Social peer victimisation     | .24<br>(.19,.29) | <.001 | 1308 | .14<br>(.10, .18)  | <.001 | 1934 | .21              | .03 | .76 |
| Verbal peer victimisation     | .29<br>(.24,.34) | <.001 | 1308 | .13<br>(.09, .18)  | <.001 | 1934 | .29 <sup>b</sup> | .00 | .71 |
| Cyber peer victimisation      | .33<br>(.28,.38) | <.001 | 1307 | .12<br>(.07, .16)  | <.001 | 1934 | .33 <sup>b</sup> | .00 | .67 |
| Physical peer Perpetration    | .14<br>(.09,.19) | <.001 | 1308 | .01<br>(-.03, .06) | .569  | 1936 | .14 <sup>b</sup> | .00 | .86 |
| Social peer Perpetration      | .14<br>(.09,.19) | <.001 | 1307 | .05<br>(.00, .09)  | .030  | 1936 | .14 <sup>b</sup> | .00 | .86 |
| Verbal peer Perpetration      | .32<br>(.27,.37) | <.001 | 1307 | .12<br>(.07, .16)  | <.001 | 1936 | .32 <sup>b</sup> | .00 | .68 |
| Cyber peer Perpetration       | .20<br>(.15,.25) | <.001 | 1307 | .03<br>(-.02, .07) | .247  | 1936 | .20 <sup>b</sup> | .00 | .80 |
| Parental role aspirations     | .35<br>(.30,.40) | <.001 | 1373 | .16<br>(.11, .20)  | <.001 | 2042 | .35 <sup>b</sup> | .00 | .65 |
| Occupational role aspirations | .27<br>(.22,.32) | <.001 | 1374 | .11<br>(.07, .15)  | <.001 | 2045 | .27 <sup>b</sup> | .00 | .73 |
| Homecare role aspirations     | .42<br>(.38,.46) | <.001 | 1374 | .17<br>(.13, .21)  | <.001 | 2045 | .42 <sup>b</sup> | .00 | .58 |
| Importance of Relationships   | .41<br>(.37,.45) | <.001 | 1543 | .10<br>(.06, .13)  | <.001 | 2434 | .41 <sup>b</sup> | .00 | .59 |
| Achievement Motivation        | .37<br>(.33,.41) | <.001 | 1543 | .18<br>(.14, .21)  | <.001 | 2434 | .37 <sup>b</sup> | .00 | .63 |

|                                      |                  |       |      |                    |       |      |                  |     |     |
|--------------------------------------|------------------|-------|------|--------------------|-------|------|------------------|-----|-----|
| Purpose in Life                      | .42<br>(.38,.46) | <.001 | 1542 | .21<br>(.18, .25)  | <.001 | 2432 | .41              | .01 | .58 |
| Importance of democracy and equality | .43<br>(.39,.47) | <.001 | 1541 | .18<br>(.14, .22)  | <.001 | 2424 | .43 <sup>b</sup> | .00 | .57 |
| Environmental concerns               | .51<br>(.47,.55) | <.001 | 1542 | .27<br>(.23, .30)  | <.001 | 2428 | .49              | .02 | .49 |
| Religiosity                          | .72<br>(.69,.74) | <.001 | 1498 | .56<br>(.54, .59)  | <.001 | 2374 | .32              | .41 | .28 |
| Importance of leisure                | .41<br>(.36,.45) | <.001 | 1338 | .19<br>(.15, .23)  | <.001 | 1997 | .41 <sup>b</sup> | .00 | .59 |
| Alcohol use                          | .45<br>(.40,.50) | <.001 | 1126 | .26<br>(.22, .31)  | <.001 | 1717 | .38              | .07 | .55 |
| Ever smoked                          | .49<br>(.45,.53) | <.001 | 1342 | .23<br>(.19, .27)  | <.001 | 1995 | .49 <sup>b</sup> | .00 | .51 |
| Ever vaped                           | .36<br>(.31,.41) | <.001 | 1342 | .20<br>(.16, .24)  | <.001 | 1990 | .31              | .04 | .64 |
| Cognitive enhancers                  | .33<br>(.28,.38) | <.001 | 1322 | .18<br>(.14, .23)  | <.001 | 1955 | .29              | .04 | .67 |
| Big 5 Agreeableness                  | .27<br>(.22,.32) | <.001 | 1419 | .03<br>(-.01, .07) | .117  | 2266 | .27 <sup>b</sup> | .00 | .73 |
| Big 5 Conscientiousness              | .34<br>(.29,.39) | <.001 | 1418 | .07<br>(.03, .11)  | .001  | 2262 | .34 <sup>b</sup> | .00 | .66 |
| Big 5 Extraversion                   | .44<br>(.40,.48) | <.001 | 1424 | .13<br>(.09, .17)  | <.001 | 2276 | .44 <sup>b</sup> | .00 | .56 |
| Big 5 Neuroticism                    | .37<br>(.32,.41) | <.001 | 1426 | .18<br>(.14, .22)  | <.001 | 2280 | .37 <sup>b</sup> | .00 | .63 |
| Big 5 Openness                       | .40<br>(.36,.44) | <.001 | 1421 | .11<br>(.07, .15)  | <.001 | 2271 | .40 <sup>b</sup> | .00 | .60 |
| Self-control                         | .40<br>(.36,.44) | <.001 | 1417 | .14<br>(.10, .18)  | <.001 | 2259 | .40 <sup>b</sup> | .00 | .60 |
| Not planning for the future          | .25<br>(.20,.30) | <.001 | 1416 | .13<br>(.09, .17)  | <.001 | 2258 | .24              | .01 | .75 |
| Ambition                             | .37<br>(.32,.41) | <.001 | 1376 | .16<br>(.11, .20)  | <.001 | 2051 | .37 <sup>b</sup> | .00 | .63 |
| Physical activity                    | .40<br>(.36,.44) | <.001 | 1528 | .17<br>(.13, .21)  | <.001 | 2371 | .40 <sup>b</sup> | .00 | .60 |
| Health behaviours                    | .54<br>(.50,.57) | <.001 | 1533 | .29<br>(.25, .33)  | <.001 | 2391 | .50              | .04 | .46 |

|                                              |                   |          |          |                   |          |          |                        |     |     |
|----------------------------------------------|-------------------|----------|----------|-------------------|----------|----------|------------------------|-----|-----|
| Risk taking behaviour                        | .48<br>(.44,.52)  | <.001    | 1413     | .23<br>(.19, .27) | <.001    | 2258     | .48 <sup>b</sup>       | .00 | .52 |
| Risky sexual behaviour                       | .61<br>(.58,.64)  | <.001    | 1413     | .29<br>(.25, .33) | <.001    | 2206     | .61 <sup>b</sup>       | .00 | .39 |
| Media use                                    | .53<br>(.49,.57)  | <.001    | 1520     | .19<br>(.15, .22) | <.001    | 2350     | .53 <sup>b</sup>       | .00 | .47 |
| Volunteering                                 | .45<br>(.41,.49)  | <.001    | 1500     | .20<br>(.16, .24) | <.001    | 2378     | .45 <sup>b</sup>       | .00 | .55 |
| Internet dating<br>(scale)                   | .34<br>(.29,.38)  | <.001    | 1512     | .17<br>(.13, .21) | <.001    | 2337     | .34 <sup>b</sup>       | .00 | .66 |
| Internet dating<br>(y/n)                     | .32<br>(.27,.36)  | <.001    | 1519     | .15<br>(.11, .18) | <.001    | 2351     | .32 <sup>b</sup>       | .00 | .68 |
| Financial literacy: Knowledge of<br>Products | .38<br>(.34,.42)  | <.001    | 1481     | .15<br>(.11, .19) | <.001    | 2266     | .38 <sup>b</sup>       | .00 | .62 |
| Financial attitudes and behaviour            | .30<br>(.25,.35)  | <.001    | 1480     | .09<br>(.05, .13) | <.001    | 2266     | .30 <sup>b</sup>       | .00 | .70 |
|                                              | MZ                |          |          | DZ <sup>a</sup>   |          |          | Falconer ACE estimates |     |     |
| Functional outcome                           | <i>r</i>          | <i>p</i> | <i>n</i> | <i>r</i>          | <i>p</i> | <i>n</i> | A                      | C   | E   |
| Wellbeing factor (1st PC)                    | .39<br>(.35, .43) | <.001    | 1477     | .23<br>(.19, .27) | <.001    | 2249     | .32                    | .07 | .61 |
| Adverse mental health factor (1st<br>PC)     | .50<br>(.45, .54) | <.001    | 1042     | .21<br>(.17, .26) | <.001    | 1578     | .50 <sup>b</sup>       | .00 | .50 |
| Adverse physical health factor (1st<br>PC)   | .40<br>(.35, .45) | <.001    | 1234     | .17<br>(.13, .22) | <.001    | 1786     | .40 <sup>b</sup>       | .00 | .60 |
| Achieved educational level                   | .40<br>(.36, .44) | <.001    | 1520     | .28<br>(.24, .32) | <.001    | 2365     | .24                    | .16 | .60 |
| Planned educational level                    | .37<br>(.31, .43) | <.001    | 735      | .11<br>(.05, .17) | <.001    | 1068     | .37 <sup>b</sup>       | .00 | .63 |

Note. MZ=monozygotic; DZ=dizygotic; and genetic (A), shared environmental (C) and non-shared environmental (E) estimates. Scores were corrected for mean age and sex differences (see Methods). Falconer's ACE estimates were derived from the intraclass twin correlations using Falconer's formula (Rijsdijk & Sham, 2002).

<sup>a</sup> Same-sex and opposite-sex DZ twins combined.

<sup>b</sup> rMZ reported as A would otherwise exceed rMZ.

## (b) Males only

| Trait                               | MZ                |          |          | DZ <sup>a</sup>    |          |          | Falconer ACE estimates |     |     |
|-------------------------------------|-------------------|----------|----------|--------------------|----------|----------|------------------------|-----|-----|
|                                     | <i>r</i>          | <i>p</i> | <i>n</i> | <i>r</i>           | <i>p</i> | <i>n</i> | A                      | C   | E   |
| Daily hassles                       | .31<br>(.22, .39) | <.001    | 445      | .07<br>(-.04, .17) | .230     | 344      | .31 <sup>b</sup>       | .00 | .69 |
| CHAOS                               | .38<br>(.30, .45) | <.001    | 523      | .24<br>(.15, .33)  | <.001    | 438      | .28                    | .11 | .62 |
| Childhood experiences               | .52<br>(.45, .59) | <.001    | 439      | .35<br>(.25, .44)  | <.001    | 336      | .35                    | .17 | .48 |
| Poor sleep quality                  | .26<br>(.17, .35) | <.001    | 432      | .19<br>(.08, .29)  | <.001    | 334      | .13                    | .12 | .74 |
| Marriage hopes                      | .14<br>(.05, .22) | .001     | 512      | .14<br>(.05, .23)  | .005     | 424      | .01                    | .13 | .86 |
| Marriage worries                    | .37<br>(.29, .44) | <.001    | 511      | .15<br>(.06, .24)  | .002     | 424      | .37 <sup>b</sup>       | .00 | .63 |
| Quality of relationship with twin   | .70<br>(.65, .74) | <.001    | 488      | .62<br>(.56, .68)  | <.001    | 409      | .16                    | .54 | .30 |
| Quality of relationship with mother | .48<br>(.41, .55) | <.001    | 479      | .15<br>(.05, .24)  | .003     | 407      | .48 <sup>b</sup>       | .00 | .53 |
| Quality of relationship with father | .56<br>(.49, .62) | <.001    | 461      | .34<br>(.25, .43)  | <.001    | 386      | .44                    | .12 | .44 |
| Number of relationships             | .50<br>(.43, .56) | <.001    | 512      | .21<br>(.12, .30)  | <.001    | 423      | .50 <sup>b</sup>       | .00 | .50 |
| Longest relationship                | .26<br>(.16, .35) | <.001    | 368      | .13<br>(.02, .24)  | .030     | 298      | .26 <sup>b</sup>       | .00 | .74 |
| Partner violence                    | .24<br>(.15, .32) | <.001    | 471      | .10<br>(.00, .20)  | .060     | 389      | .24 <sup>b</sup>       | .00 | .76 |
| Contact with mother                 | .48<br>(.34, .60) | <.001    | 132      | .40<br>(.21, .56)  | <.001    | 88       | .15                    | .33 | .52 |
| Communication with mother           | .58<br>(.46, .68) | <.001    | 136      | .44<br>(.26, .59)  | <.001    | 91       | .29                    | .29 | .42 |
| Contact with father                 | .46<br>(.33, .57) | <.001    | 159      | .43<br>(.26, .57)  | <.001    | 106      | .07                    | .39 | .54 |
| Communication with father           | .69<br>(.60, .76) | <.001    | 179      | .49<br>(.34, .62)  | <.001    | 116      | .41                    | .28 | .31 |
| Peer pressure                       | .40<br>(.32, .47) | <.001    | 495      | .18<br>(.09, .27)  | <.001    | 422      | .40 <sup>b</sup>       | .00 | .60 |

|                                      |                   |       |     |                     |       |     |                  |     |     |
|--------------------------------------|-------------------|-------|-----|---------------------|-------|-----|------------------|-----|-----|
| Physical peer victimisation          | .25<br>(.16, .34) | <.001 | 427 | .04<br>(-.07, .15)  | .486  | 331 | .25 <sup>b</sup> | .00 | .75 |
| Social peer victimisation            | .13<br>(.04, .22) | .005  | 427 | .26<br>(.16, .36)   | <.001 | 331 | .00              | .13 | .87 |
| Verbal peer victimisation            | .24<br>(.15, .33) | <.001 | 427 | .13<br>(.02, .23)   | .017  | 329 | .22              | .02 | .76 |
| Cyber peer victimisation             | .23<br>(.14, .32) | <.001 | 427 | .13<br>(.02, .23)   | .017  | 330 | .19              | .04 | .77 |
| Physical peer Perpetration           | .17<br>(.08, .26) | .001  | 426 | .09<br>(-.02, .20)  | .115  | 331 | .16              | .01 | .84 |
| Social peer Perpetration             | .16<br>(.07, .25) | .001  | 426 | .00<br>(-.11, .11)  | .993  | 331 | .16 <sup>b</sup> | .00 | .85 |
| Verbal peer Perpetration             | .36<br>(.27, .44) | <.001 | 426 | .11<br>(.00, .22)   | .053  | 331 | .36 <sup>b</sup> | .00 | .64 |
| Cyber peer Perpetration              | .18<br>(.09, .27) | <.001 | 426 | -.04<br>(-.15, .07) | .482  | 331 | .18 <sup>b</sup> | .00 | .82 |
| Parental role aspirations            | .29<br>(.20, .37) | <.001 | 442 | .02<br>(-.09, .13)  | .660  | 337 | .29 <sup>b</sup> | .00 | .71 |
| Occupational role aspirations        | .23<br>(.14, .32) | <.001 | 442 | .10<br>(-.01, .20)  | .067  | 337 | .23 <sup>b</sup> | .00 | .77 |
| Homecare role aspirations            | .46<br>(.38, .53) | <.001 | 442 | .20<br>(.10, .30)   | <.001 | 337 | .46 <sup>b</sup> | .00 | .54 |
| Importance of Relationships          | .47<br>(.40, .54) | <.001 | 510 | .06<br>(-.04, .15)  | .199  | 425 | .47 <sup>b</sup> | .00 | .53 |
| Achievement Motivation               | .34<br>(.26, .41) | <.001 | 510 | .24<br>(.15, .33)   | <.001 | 425 | .20              | .14 | .66 |
| Purpose in Life                      | .43<br>(.36, .50) | <.001 | 510 | .30<br>(.21, .38)   | <.001 | 425 | .26              | .17 | .57 |
| Importance of democracy and equality | .44<br>(.37, .51) | <.001 | 511 | .24<br>(.15, .33)   | <.001 | 423 | .40              | .04 | .56 |
| Environmental concerns               | .55<br>(.49, .61) | <.001 | 511 | .29<br>(.20, .37)   | <.001 | 425 | .54              | .02 | .45 |
| Religiosity                          | .74<br>(.70, .78) | <.001 | 497 | .62<br>(.56, .68)   | <.001 | 424 | .24              | .50 | .26 |

|                             |                   |       |     |                   |       |     |                  |     |     |
|-----------------------------|-------------------|-------|-----|-------------------|-------|-----|------------------|-----|-----|
| Importance of leisure       | .38<br>(.30, .46) | <.001 | 432 | .18<br>(.07, .28) | .001  | 331 | .38 <sup>b</sup> | .00 | .63 |
| Alcohol use                 | .40<br>(.31, .48) | <.001 | 369 | .22<br>(.11, .33) | <.001 | 292 | .36              | .04 | .60 |
| Ever smoked                 | .48<br>(.40, .55) | <.001 | 433 | .24<br>(.14, .34) | <.001 | 333 | .47              | .01 | .53 |
| Ever vaped                  | .36<br>(.28, .44) | <.001 | 432 | .26<br>(.16, .36) | <.001 | 332 | .20              | .16 | .64 |
| Cognitive enhancers         | .31<br>(.22, .39) | <.001 | 420 | .17<br>(.06, .27) | .003  | 325 | .28              | .02 | .69 |
| Big 5 Agreeableness         | .32<br>(.24, .40) | <.001 | 483 | .10<br>(.00, .20) | .049  | 404 | .32 <sup>b</sup> | .00 | .68 |
| Big 5 Conscientiousness     | .38<br>(.30, .45) | <.001 | 482 | .13<br>(.03, .22) | .009  | 404 | .38 <sup>b</sup> | .00 | .62 |
| Big 5 Extraversion          | .47<br>(.40, .54) | <.001 | 485 | .15<br>(.05, .24) | .003  | 408 | .47 <sup>b</sup> | .00 | .53 |
| Big 5 Neuroticism           | .31<br>(.23, .39) | <.001 | 485 | .20<br>(.11, .29) | <.001 | 410 | .21              | .10 | .69 |
| Big 5 Openness              | .41<br>(.33, .48) | <.001 | 484 | .17<br>(.07, .26) | <.001 | 407 | .41 <sup>b</sup> | .00 | .59 |
| Self-control                | .37<br>(.29, .44) | <.001 | 482 | .14<br>(.04, .23) | .006  | 401 | .37 <sup>b</sup> | .00 | .63 |
| Not planning for the future | .31<br>(.23, .39) | <.001 | 481 | .13<br>(.03, .23) | .011  | 401 | .31 <sup>b</sup> | .00 | .69 |
| Ambition                    | .37<br>(.29, .45) | <.001 | 445 | .15<br>(.05, .25) | .005  | 344 | .37 <sup>b</sup> | .00 | .63 |
| Physical activity           | .41<br>(.33, .48) | <.001 | 501 | .17<br>(.08, .26) | .001  | 416 | .41 <sup>b</sup> | .00 | .59 |
| Health behaviours           | .53<br>(.46, .59) | <.001 | 504 | .25<br>(.16, .34) | <.001 | 417 | .53 <sup>b</sup> | .00 | .47 |
| Risk taking behaviour       | .53<br>(.46, .59) | <.001 | 479 | .24<br>(.15, .33) | <.001 | 400 | .53 <sup>b</sup> | .00 | .47 |
| Risky sexual behaviour      | .61<br>(.55, .66) | <.001 | 468 | .31<br>(.22, .40) | <.001 | 389 | .59              | .01 | .39 |
| Media use                   | .57<br>(.51, .63) | <.001 | 498 | .12<br>(.02, .21) | .014  | 413 | .57 <sup>b</sup> | .00 | .44 |
| Volunteering                | .49<br>(.42, .55) | <.001 | 497 | .27<br>(.18, .36) | <.001 | 424 | .44              | .05 | .51 |

|                                           |                   |          |          |                   |          |          |                        |     |     |
|-------------------------------------------|-------------------|----------|----------|-------------------|----------|----------|------------------------|-----|-----|
| Internet dating (scale)                   | .36<br>(.28, .43) | <.001    | 498      | .19<br>(.10, .28) | <.001    | 414      | .34                    | .02 | .64 |
| Internet dating (y/n)                     | .33<br>(.25, .41) | <.001    | 499      | .21<br>(.12, .30) | <.001    | 416      | .25                    | .08 | .67 |
| Financial literacy: Knowledge of Products | .48<br>(.41, .54) | <.001    | 500      | .27<br>(.18, .36) | <.001    | 407      | .42                    | .06 | .52 |
| Financial attitudes and behaviour         | .30<br>(.22, .38) | <.001    | 500      | .14<br>(.04, .23) | .004     | 407      | .30 <sup>b</sup>       | .00 | .70 |
|                                           | MZ                |          |          | DZ <sup>a</sup>   |          |          | Falconer ACE estimates |     |     |
| Functional outcome                        | <i>r</i>          | <i>p</i> | <i>n</i> | <i>r</i>          | <i>p</i> | <i>n</i> | A                      | C   | E   |
| Wellbeing factor (1st PC)                 | .34<br>(.26, .42) | <.001    | 497      | .25<br>(.16, .34) | <.001    | 404      | .18                    | .16 | .66 |
| Adverse mental health factor (1st PC)     | .37<br>(.27, .46) | <.001    | 338      | .22<br>(.10, .33) | <.001    | 271      | .29                    | .08 | .64 |
| Adverse physical health factor (1st PC)   | .39<br>(.30, .47) | <.001    | 383      | .13<br>(.02, .24) | .020     | 302      | .39 <sup>b</sup>       | .00 | .61 |
| Achieved educational level                | .40<br>(.32, .47) | <.001    | 502      | .19<br>(.10, .28) | <.001    | 412      | .40 <sup>b</sup>       | .00 | .60 |
| Planned educational level                 | .43<br>(.32, .53) | <.001    | 247      | .16<br>(.01, .30) | .033     | 172      | .43 <sup>b</sup>       | .00 | .57 |

Note. MZ=monozygotic; DZ=dizygotic; and genetic (A), shared environmental (C) and non-shared environmental (E) estimates. Scores were corrected for mean age and sex differences (see Methods). Falconer's ACE estimates were derived from the intraclass twin correlations using Falconer's formula (Rijsdijk & Sham, 2002).

<sup>a</sup> Same-sex male DZ twins.

<sup>b</sup> rMZ reported as A would otherwise exceed rMZ.

(c) females only

| Trait         | MZ                |          |          | DZ <sup>a</sup>   |          |          | Falconer ACE estimates |     |     |
|---------------|-------------------|----------|----------|-------------------|----------|----------|------------------------|-----|-----|
|               | <i>r</i>          | <i>p</i> | <i>n</i> | <i>r</i>          | <i>p</i> | <i>n</i> | A                      | C   | E   |
| Daily hassles | .32<br>(.26, .38) | <.001    | 931      | .16<br>(.09, .23) | <.001    | 757      | .32 <sup>b</sup>       | .00 | .68 |
| CHAOS         | .40<br>(.35, .45) | <.001    | 1065     | .43<br>(.37, .48) | <.001    | 873      | .00                    | .40 | .60 |



|                                     |                   |       |      |                    |       |     |                  |     |     |
|-------------------------------------|-------------------|-------|------|--------------------|-------|-----|------------------|-----|-----|
| Childhood experiences               | .70<br>(.67, .73) | <.001 | 928  | .47<br>(.41, .52)  | <.001 | 752 | .46              | .24 | .30 |
| Poor sleep quality                  | .33<br>(.27, .39) | <.001 | 902  | .21<br>(.14, .28)  | <.001 | 740 | .26              | .08 | .67 |
| Marriage hopes                      | .34<br>(.29, .39) | <.001 | 1038 | .23<br>(.16, .29)  | <.001 | 833 | .21              | .13 | .66 |
| Marriage worries                    | .38<br>(.33, .43) | <.001 | 1038 | .24<br>(.17, .30)  | <.001 | 833 | .29              | .10 | .62 |
| Quality of relationship with twin   | .69<br>(.66, .72) | <.001 | 1009 | .64<br>(.60, .68)  | <.001 | 813 | .09              | .60 | .32 |
| Quality of relationship with mother | .56<br>(.52, .60) | <.001 | 999  | .35<br>(.29, .41)  | <.001 | 799 | .41              | .15 | .45 |
| Quality of relationship with father | .63<br>(.59, .67) | <.001 | 961  | .47<br>(.41, .52)  | <.001 | 770 | .32              | .31 | .37 |
| Number of relationships             | .44<br>(.39, .49) | <.001 | 1036 | .26<br>(.20, .32)  | <.001 | 833 | .34              | .09 | .57 |
| Longest relationship                | .34<br>(.28, .40) | <.001 | 784  | .12<br>(.04, .20)  | .005  | 600 | .34 <sup>b</sup> | .00 | .66 |
| Partner violence                    | .25<br>(.19, .31) | <.001 | 986  | .11<br>(.04, .18)  | .003  | 794 | .25 <sup>b</sup> | .00 | .75 |
| Contact with mother                 | .57<br>(.49, .64) | <.001 | 294  | .34<br>(.22, .45)  | <.001 | 224 | .46              | .11 | .43 |
| Communication with mother           | .67<br>(.60, .73) | <.001 | 304  | .33<br>(.21, .44)  | <.001 | 228 | .67 <sup>b</sup> | .00 | .33 |
| Contact with father                 | .52<br>(.44, .59) | <.001 | 352  | .45<br>(.35, .54)  | <.001 | 271 | .15              | .37 | .48 |
| Communication with father           | .74<br>(.69, .78) | <.001 | 396  | .70<br>(.64, .75)  | <.001 | 298 | .08              | .66 | .26 |
| Peer pressure                       | .31<br>(.25, .37) | <.001 | 999  | .15<br>(.08, .22)  | <.001 | 812 | .31 <sup>b</sup> | .00 | .69 |
| Physical peer victimisation         | .09<br>(.02, .16) | .006  | 881  | .01<br>(-.06, .08) | .776  | 712 | .09 <sup>b</sup> | .00 | .91 |
| Social peer victimisation           | .29<br>(.23, .35) | <.001 | 881  | .14<br>(.07, .21)  | <.001 | 712 | .29 <sup>b</sup> | .00 | .71 |
| Verbal peer victimisation           | .32<br>(.26, .38) | <.001 | 881  | .16<br>(.09, .23)  | <.001 | 713 | .32              | .00 | .68 |

|                                      |                   |       |      |                     |       |     |                  |     |     |
|--------------------------------------|-------------------|-------|------|---------------------|-------|-----|------------------|-----|-----|
| Cyber peer victimisation             | .37<br>(.31, .43) | <.001 | 880  | .06<br>(-.01, .13)  | .129  | 713 | .37 <sup>b</sup> | .00 | .63 |
| Physical peer Perpetration           | .08<br>(.01, .15) | .016  | 882  | -.02<br>(-.09, .05) | .551  | 714 | .08 <sup>b</sup> | .00 | .92 |
| Social peer Perpetration             | .13<br>(.06, .19) | <.001 | 881  | .15<br>(.08, .22)   | <.001 | 714 | .00              | .13 | .87 |
| Verbal peer Perpetration             | .27<br>(.21, .33) | <.001 | 881  | .16<br>(.09, .23)   | <.001 | 714 | .22              | .05 | .73 |
| Cyber peer Perpetration              | .22<br>(.16, .28) | <.001 | 881  | .14<br>(.07, .21)   | <.001 | 714 | .17              | .05 | .78 |
| Parental role aspirations            | .38<br>(.32, .43) | <.001 | 931  | .21<br>(.14, .28)   | <.001 | 754 | .33              | .04 | .63 |
| Occupational role aspirations        | .30<br>(.24, .36) | <.001 | 932  | .15<br>(.08, .22)   | <.001 | 755 | .29              | .00 | .70 |
| Homecare role aspirations            | .39<br>(.33, .44) | <.001 | 932  | .24<br>(.17, .31)   | <.001 | 755 | .29              | .10 | .61 |
| Importance of Relationships          | .38<br>(.33, .43) | <.001 | 1033 | .13<br>(.06, .20)   | <.001 | 840 | .38 <sup>b</sup> | .00 | .63 |
| Achievement Motivation               | .38 (.33, .43)    | <.001 | 1033 | .15<br>(.08, .22)   | <.001 | 840 | .38 <sup>b</sup> | .00 | .62 |
| Purpose in Life                      | .41<br>(.36, .46) | <.001 | 1032 | .20<br>(.13, .26)   | <.001 | 839 | .41 <sup>b</sup> | .00 | .59 |
| Importance of democracy and equality | .42<br>(.37, .47) | <.001 | 1030 | .14<br>(.07, .21)   | <.001 | 836 | .42 <sup>b</sup> | .00 | .58 |
| Environmental concerns               | .49<br>(.44, .54) | <.001 | 1031 | .30<br>(.24, .36)   | <.001 | 838 | .38              | .11 | .51 |
| Religiosity                          | .71<br>(.68, .74) | <.001 | 1001 | .56<br>(.51, .61)   | <.001 | 813 | .32              | .40 | .29 |
| Importance of leisure                | .43<br>(.38, .48) | <.001 | 906  | .23<br>(.16, .30)   | <.001 | 743 | .39              | .04 | .57 |
| Alcohol use                          | .49<br>(.43, .54) | <.001 | 757  | .31<br>(.24, .38)   | <.001 | 624 | .34              | .14 | .52 |
| Ever smoked                          | .50<br>(.45, .55) | <.001 | 909  | .23<br>(.16, .30)   | <.001 | 733 | .50 <sup>b</sup> | .00 | .50 |
| Ever vaped                           | .36<br>(.30, .42) | <.001 | 910  | .20<br>(.13, .27)   | <.001 | 734 | .32              | .04 | .65 |

|                                              |                   |       |      |                     |       |     |                  |     |     |
|----------------------------------------------|-------------------|-------|------|---------------------|-------|-----|------------------|-----|-----|
| Cognitive enhancers                          | .34<br>(.28, .40) | <.001 | 902  | .24<br>(.17, .31)   | <.001 | 725 | .20              | .14 | .66 |
| Big 5 Agreeableness                          | .24<br>(.18, .30) | <.001 | 936  | -.02<br>(-.09, .05) | .643  | 768 | .24 <sup>b</sup> | .00 | .76 |
| Big 5 Conscientiousness                      | .32<br>(.26, .38) | <.001 | 936  | .03<br>(-.04, .10)  | .368  | 766 | .32 <sup>b</sup> | .00 | .68 |
| Big 5 Extraversion                           | .43<br>(.38, .48) | <.001 | 939  | .09<br>(.02, .16)   | .009  | 771 | .43 <sup>b</sup> | .00 | .58 |
| Big 5 Neuroticism                            | .40<br>(.34, .45) | <.001 | 941  | .21<br>(.14, .28)   | <.001 | 772 | .37              | .02 | .61 |
| Big 5 Openness                               | .40<br>(.34, .45) | <.001 | 937  | .10<br>(.03, .17)   | .007  | 770 | .40 <sup>b</sup> | .00 | .60 |
| Self-control                                 | .41<br>(.36, .46) | <.001 | 935  | .15<br>(.08, .22)   | <.001 | 766 | .41 <sup>b</sup> | .00 | .59 |
| Not planning for the future                  | .22<br>(.16, .28) | <.001 | 935  | .11 (.04, .18)      | .002  | 766 | .22              | .00 | .78 |
| Ambition                                     | .37<br>(.31, .42) | <.001 | 931  | .16<br>(.09, .23)   | <.001 | 757 | .37 <sup>b</sup> | .00 | .63 |
| Physical activity                            | .40<br>(.35, .45) | <.001 | 1027 | .21<br>(.14, .27)   | <.001 | 823 | .40              | .01 | .60 |
| Health behaviours                            | .55<br>(.51, .59) | <.001 | 1029 | .34<br>(.28, .40)   | <.001 | 831 | .41              | .14 | .45 |
| Risk taking behaviour                        | .45<br>(.40, .50) | <.001 | 934  | .23<br>(.16, .30)   | <.001 | 768 | .45 <sup>b</sup> | .00 | .55 |
| Risky sexual behaviour                       | .61 (.57, .65)    | <.001 | 945  | .33<br>(.26, .39)   | <.001 | 755 | .57              | .04 | .39 |
| Media use                                    | .51 (.46, .55)    | <.001 | 1022 | .21<br>(.14, .27)   | <.001 | 813 | .51 <sup>b</sup> | .00 | .49 |
| Volunteering                                 | .43 (.38, .48)    | <.001 | 1003 | .19<br>(.12, .26)   | <.001 | 814 | .43 <sup>b</sup> | .00 | .57 |
| Internet dating<br>(scale)                   | .32 (.26, .37)    | <.001 | 1014 | .19<br>(.12, .26)   | <.001 | 811 | .27              | .05 | .68 |
| Internet dating<br>(y/n)                     | .31 (.25, .36)    | <.001 | 1020 | .18<br>(.11, .25)   | <.001 | 815 | .25              | .06 | .69 |
| Financial literacy: Knowledge of<br>Products | .31 (.25, .37)    | <.001 | 981  | .15<br>(.08, .22)   | <.001 | 777 | .31 <sup>b</sup> | .00 | .69 |
| Financial attitudes and behaviour            | .30 (.24, .36)    | <.001 | 980  | .08<br>(.01, .15)   | .025  | 777 | .30 <sup>b</sup> | .00 | .70 |

| Functional outcome                      | MZ                |          |          | DZ <sup>a</sup>   |          |          | Falconer ACE estimates |     |     |
|-----------------------------------------|-------------------|----------|----------|-------------------|----------|----------|------------------------|-----|-----|
|                                         | <i>r</i>          | <i>p</i> | <i>n</i> | <i>r</i>          | <i>p</i> | <i>n</i> | A                      | C   | E   |
| Wellbeing factor (1st PC)               | .41<br>(.36, .46) | <.001    | 980      | .31<br>(.24, .37) | <.001    | 770      | .21                    | .21 | .59 |
| Adverse mental health factor (1st PC)   | .54<br>(.49, .59) | <.001    | 704      | .26<br>(.18, .33) | <.001    | 584      | .54 <sup>b</sup>       | .00 | .46 |
| Adverse physical health factor (1st PC) | .40<br>(.34, .46) | <.001    | 851      | .25<br>(.18, .32) | <.001    | 673      | .31                    | .09 | .60 |
| Achieved educational level              | .40<br>(.35, .45) | <.001    | 1018     | .31<br>(.25, .37) | <.001    | 816      | .17                    | .23 | .60 |
| Planned educational level               | .33<br>(.25, .41) | <.001    | 488      | .14<br>(.04, .23) | .007     | 399      | .33 <sup>b</sup>       | .00 | .67 |

Note. MZ=monozygotic; DZ=dizygotic; and genetic (A), shared environmental (C) and non-shared environmental (E) estimates. Scores were corrected for mean age and sex differences (see Methods). Falconer's ACE estimates were derived from the intraclass twin correlations using Falconer's formula (Rijsdijk & Sham, 2002).

<sup>a</sup> Same-sex female DZ twins.

<sup>b</sup> rMZ reported as A would otherwise exceed rMZ.

**Table S9.** Univariate twin analyses presenting additive genetic (A), shared environmental (C), and non-shared environmental (E) components of variance EA traits and functional outcomes (95% confidence intervals are in parentheses).

| Trait                 | Model fitting results |                  |                  |                  |                  |                  |                  |                  |                  |                          |                  |                  |
|-----------------------|-----------------------|------------------|------------------|------------------|------------------|------------------|------------------|------------------|------------------|--------------------------|------------------|------------------|
|                       | Whole sample          |                  |                  | Males only       |                  |                  | Females only     |                  |                  | Same-sex MZ and DZ twins |                  |                  |
|                       | A                     | C                | E                | A                | C                | E                | A                | C                | E                | A                        | C                | E                |
| Daily hassles         | .31<br>(.19,.35)      | .00<br>(.00,.09) | .69<br>(.65,.74) | .28<br>(.13,.35) | .00<br>(.00,.00) | .72<br>(.65,.79) | .28<br>(.13,.37) | .03<br>(.00,.15) | .69<br>(.63,.74) | .31<br>(.19,.35)         | .00<br>(.00,.10) | .69<br>(.65,.74) |
| CHAOS                 | .12<br>(.01,.22)      | .30<br>(.22,.37) | .59<br>(.55,.63) | .28<br>(.10,.45) | .13<br>(.00,.26) | .59<br>(.52,.66) | .03<br>(.00,.15) | .39<br>(.29,.44) | .58<br>(.54,.62) | .11<br>(.00,.22)         | .31<br>(.21,.40) | .58<br>(.54,.62) |
| Childhood experiences | .46<br>(.37,.54)      | .19<br>(.12,.27) | .35<br>(.32,.38) | .50<br>(.33,.63) | .08<br>(.00,.20) | .43<br>(.37,.49) | .40<br>(.30,.50) | .29<br>(.19,.37) | .32<br>(.29,.35) | .39<br>(.29,.49)         | .27<br>(.17,.36) | .34<br>(.31,.37) |
| Poor sleep quality    | .27<br>(.14,.35)      | .04<br>(.00,.14) | .70<br>(.65,.75) | .23<br>(.01,.33) | .02<br>(.00,.18) | .75<br>(.67,.84) | .27<br>(.11,.38) | .05<br>(.00,.18) | .67<br>(.62,.73) | .16<br>(.01,.32)         | .14<br>(.01,.27) | .69<br>(.65,.74) |
| Marriage hopes        | .19<br>(.07,.31)      | .09<br>(.00,.18) | .72<br>(.68,.77) | .00<br>(.00,.21) | .15<br>(.00,.20) | .85<br>(.76,.90) | .25<br>(.11,.38) | .08<br>(.00,.19) | .67<br>(.62,.72) | .15<br>(.01,.29)         | .13<br>(.01,.24) | .72<br>(.68,.77) |

|                                     |                  |                  |                  |                  |                  |                  |                  |                  |                   |                  |                  |                  |
|-------------------------------------|------------------|------------------|------------------|------------------|------------------|------------------|------------------|------------------|-------------------|------------------|------------------|------------------|
| Marriage worries                    | .37<br>(.26,.42) | .01<br>(.00,.10) | .62<br>(.58,.66) | .36<br>(.22,.42) | .00<br>(.00,.10) | .64<br>(.58,.71) | .31<br>(.17,.43) | .07<br>(.00,.18) | .61<br>(.57,.67)  | .32<br>(.19,.42) | .06<br>(.00,.17) | .62<br>(.58,.66) |
| Quality of relationship with twin   | .24<br>(.19,.30) | .52<br>(.47,.56) | .24<br>(.22,.26) | .20<br>(.11,.29) | .55<br>(.48,.62) | .24<br>(.21,.28) | .26<br>(.19,.34) | .49<br>(.43,.55) | .24<br>(.22,.27)  | .18<br>(.12,.25) | .55<br>(.49,.61) | .27<br>(.25,.29) |
| Quality of relationship with mother | .53<br>(.43,.57) | .00<br>(.00,.08) | .46<br>(.43,.50) | .47<br>(.37,.52) | .00<br>(.00,.06) | .53<br>(.48,.60) | .48<br>(.36,.59) | .08<br>(.00,.18) | .44<br>(.40,.48)  | .48<br>(.36,.57) | .06<br>(.00,.16) | .46<br>(.43,.49) |
| Quality of relationship with father | .35<br>(.27,.44) | .26<br>(.19,.33) | .39<br>(.36,.42) | .38<br>(.22,.53) | .19<br>(.07,.31) | .43<br>(.38,.49) | .33<br>(.23,.43) | .30<br>(.21,.39) | .37<br>(.33,.40)  | .33<br>(.23,.44) | .28<br>(.19,.37) | .38<br>(.35,.41) |
| Number of relationships             | .45<br>(.40,.49) | .00<br>(.00,.00) | .55<br>(.51,.58) | .46<br>(.38,.52) | .00<br>(.00,.05) | .54<br>(.48,.60) | .44<br>(.35,.48) | .00<br>(.00,.00) | .56<br>(.52,.60)  | .44<br>(.32,.50) | .03<br>(.00,.13) | .53<br>(.50,.57) |
| Longest relationship                | .28<br>(.23,.33) | .00<br>(.00,.00) | .72<br>(.67,.76) | .21<br>(.09,.29) | .00<br>(.00,.00) | .79<br>(.71,.87) | .32<br>(.25,.38) | .00<br>(.00,.00) | .68<br>(.62,.73)  | .32<br>(.22,.36) | .00<br>(.00,.08) | .68<br>(.64,.73) |
| Partner violence                    | .25<br>(.12,.29) | 0<br>(.00,.10)   | .75<br>(.71,.80) | .27<br>(.05,.35) | .00<br>(.00,.00) | .73<br>(.65,.82) | .24<br>(.09,.30) | .00<br>(.00,.12) | .76<br>(.70,.81)  | .25<br>(.12,.29) | .00<br>(.00,.10) | .75<br>(.71,.80) |
| Contact with mother                 | .47<br>(.28,.62) | .10<br>(.00,.25) | .44<br>(.38,.50) | .44<br>(.09,.63) | .09<br>(.00,.35) | .47<br>(.37,.61) | .48<br>(.25,.64) | .10<br>(.00,.29) | .42<br>(.36,.49)  | .38<br>(.17,.60) | .19<br>(.00,.37) | .43<br>(.38,.50) |
| Communication with mother           | .37<br>(.21,.54) | .26<br>(.10,.39) | .37<br>(.33,.43) | .37<br>(.08,.66) | .24<br>(.00,.46) | .39<br>(.31,.50) | .35<br>(.15,.57) | .28<br>(.08,.45) | .37<br>(.31,.43)  | .41<br>(.21,.63) | .22<br>(.01,.40) | .37<br>(.32,.42) |
| Contact with father                 | .13<br>(.00,.30) | .38<br>(.24,.50) | .49<br>(.43,.55) | .03<br>(.00,.33) | .41<br>(.16,.50) | .56<br>(.46,.65) | .19<br>(.00,.39) | .36<br>(.19,.52) | .45<br>(.39,.52)  | .10<br>(.00,.29) | .43<br>(.25,.54) | .48<br>(.42,.54) |
| Communication with father           | .12<br>(.02,.21) | .61<br>(.53,.68) | .28<br>(.25,.31) | .18<br>(.00,.38) | .48<br>(.32,.63) | .33<br>(.27,.41) | .07<br>(.00,.18) | .68<br>(.59,.75) | .25<br>(.22,.29)  | .09<br>(.00,.20) | .64<br>(.54,.73) | .27<br>(.24,.31) |
| Peer pressure                       | .35<br>(.27,.39) | .00<br>(.00,.05) | .65<br>(.61,.69) | .40<br>(.27,.46) | .00<br>(.00,.09) | .60<br>(.54,.67) | .31<br>(.21,.36) | .00<br>(.00,.08) | .69<br>(.64,.74)  | .35<br>(.24,.39) | .00<br>(.00,.09) | .65<br>(.61,.69) |
| Physical peer victimisation         | .17<br>(.11,.22) | .00<br>(.00,.00) | .83<br>(.78,.88) | .19<br>(.06,.26) | .00<br>(.00,.00) | .81<br>(.74,.88) | .09<br>(.00,.17) | .00<br>(.00,.07) | .91<br>(.83,.99)  | .19<br>(.10,.25) | .00<br>(.00,.00) | .81<br>(.75,.86) |
| Social peer victimisation           | .27<br>(.14,.32) | .00<br>(.00,.09) | .73<br>(.68,.78) | .00<br>(.00,.23) | .17<br>(.02,.22) | .83<br>(.73,.88) | .29<br>(.20,.34) | .00<br>(.00,.06) | .71<br>(.66,.77)  | .20<br>(.05,.32) | .07<br>(.00,.19) | .73<br>(.68,.79) |
| Verbal peer victimisation           | .30<br>(.21,.34) | .00<br>(.00,.06) | .70<br>(.66,.75) | .18<br>(.00,.33) | .07<br>(.00,.22) | .76<br>(.67,.85) | .32<br>(.24,.37) | .00<br>(.00,.00) | .68<br>(.63,.74)  | .30<br>(.14,.34) | .00<br>(.00,.13) | .70<br>(.66,.75) |
| Cyber peer victimisation            | .33<br>(.26,.37) | .00<br>(.00,.04) | .67<br>(.63,.72) | .06<br>(.00,.29) | .18<br>(.02,.27) | .75<br>(.66,.83) | .34<br>(.29,.40) | .00<br>(.00,.03) | .66<br>(.60,.71)  | .32<br>(.25,.37) | .00<br>(.00,.05) | .68<br>(.63,.73) |
| Physical peer Perpetration          | .12<br>(.05,.17) | .00<br>(.00,.00) | .88<br>(.83,.93) | .13<br>(.00,.20) | .00<br>(.00,.13) | .87<br>(.80,.95) | .05<br>(.00,.12) | .00<br>(.00,.05) | .95<br>(.88,1.00) | .13<br>(.00,.21) | .02<br>(.00,.16) | .85<br>(.79,.91) |
| Social peer Perpetration            | .15<br>(.06,.2)  | .00<br>(.00,.06) | .85<br>(.80,.91) | .15<br>(.01,.25) | .00<br>(.00,.00) | .85<br>(.75,.94) | .14<br>(.00,.20) | .00<br>(.00,.11) | .86<br>(.80,.92)  | .14<br>(.00,.22) | .02<br>(.00,.15) | .84<br>(.78,.90) |

|                                      |                  |                  |                  |                  |                  |                  |                  |                  |                  |                  |                  |                  |
|--------------------------------------|------------------|------------------|------------------|------------------|------------------|------------------|------------------|------------------|------------------|------------------|------------------|------------------|
| Verbal peer Perpetration             | .31<br>(.26,.36) | .00<br>(.00,.03) | .69<br>(.64,.73) | .32<br>(.19,.38) | .00<br>(.00,.00) | .68<br>(.62,.75) | .29<br>(.21,.35) | .00<br>(.00,.05) | .71<br>(.65,.77) | .32<br>(.21,.36) | .00<br>(.00,.09) | .68<br>(.64,.73) |
| Cyber peer Perpetration              | .19<br>(.13,.24) | 0<br>(.00,.03)   | .81<br>(.76,.87) | .14<br>(.02,.23) | .00<br>(.00,.00) | .86<br>(.77,.95) | .21<br>(.13,.27) | .00<br>(.00,.06) | .79<br>(.73,.85) | .20<br>(.10,.25) | .00<br>(.00,.08) | .80<br>(.75,.85) |
| Parental role aspirations            | .34<br>(.26,.38) | .00<br>(.00,.06) | .66<br>(.62,.70) | .25<br>(.14,.32) | .00<br>(.00,.00) | .75<br>(.68,.83) | .35<br>(.20,.44) | .03<br>(.00,.15) | .61<br>(.56,.67) | .35<br>(.26,.39) | .00<br>(.00,.00) | .65<br>(.61,.70) |
| Occupational role aspirations        | .26<br>(.18,.3)  | .00<br>(.00,.06) | .74<br>(.70,.78) | .20<br>(.06,.27) | .00<br>(.00,.10) | .80<br>(.73,.87) | .29<br>(.16,.34) | .00<br>(.00,.10) | .71<br>(.66,.76) | .27<br>(.13,.32) | .00<br>(.00,.12) | .73<br>(.68,.78) |
| Homecare role aspirations            | .40<br>(.33,.44) | .00<br>(.00,.05) | .60<br>(.56,.64) | .41<br>(.31,.47) | .00<br>(.00,.07) | .59<br>(.53,.65) | .39<br>(.27,.43) | .00<br>(.00,.09) | .61<br>(.57,.66) | .36<br>(.22,.45) | .05<br>(.00,.17) | .59<br>(.55,.63) |
| Importance of Relationships          | .37<br>(.33,.4)  | .00<br>(.00,.02) | .63<br>(.60,.67) | .38<br>(.32,.44) | .00<br>(.00,.04) | .62<br>(.56,.68) | .34<br>(.29,.39) | .00<br>(.00,.03) | .66<br>(.61,.71) | .39<br>(.34,.43) | .00<br>(.00,.03) | .61<br>(.57,.65) |
| Achievement Motivation               | .37<br>(.28,.4)  | .00<br>(.00,.06) | .63<br>(.60,.67) | .31<br>(.12,.41) | .03<br>(.00,.17) | .66<br>(.59,.74) | .38<br>(.29,.42) | .00<br>(.00,.06) | .62<br>(.58,.67) | .35<br>(.22,.41) | .01<br>(.00,.13) | .63<br>(.59,.68) |
| Purpose in Life                      | .42<br>(.31,.46) | .01<br>(.00,.09) | .57<br>(.54,.61) | .39<br>(.21,.49) | .04<br>(.00,.17) | .57<br>(.51,.64) | .42<br>(.30,.47) | .00<br>(.00,.00) | .58<br>(.53,.63) | .37<br>(.25,.46) | .05<br>(.00,.16) | .57<br>(.54,.62) |
| Importance of democracy and equality | .43<br>(.38,.47) | .00<br>(.00,.03) | .57<br>(.53,.60) | .42<br>(.24,.49) | .02<br>(.00,.15) | .56<br>(.51,.63) | .43<br>(.37,.47) | .00<br>(.00,.00) | .57<br>(.53,.62) | .44<br>(.37,.47) | .00<br>(.00,.05) | .56<br>(.53,.60) |
| Environmental concerns               | .53<br>(.43,.56) | .00<br>(.00,.08) | .47<br>(.44,.51) | .54<br>(.41,.59) | .00<br>(.00,.00) | .46<br>(.41,.52) | .48<br>(.35,.55) | .03<br>(.00,.13) | .49<br>(.45,.54) | .47<br>(.35,.55) | .06<br>(.00,.15) | .48<br>(.45,.51) |
| Religiosity                          | .25<br>(.19,.32) | .44<br>(.39,.49) | .31<br>(.28,.33) | .22<br>(.12,.32) | .48<br>(.39,.55) | .30<br>(.26,.34) | .28<br>(.20,.36) | .41<br>(.34,.48) | .31<br>(.28,.34) | .22<br>(.14,.30) | .48<br>(.41,.55) | .30<br>(.28,.32) |
| Importance of leisure                | .41<br>(.31,.45) | .00<br>(.00,.08) | .59<br>(.55,.63) | .38<br>(.17,.45) | .01<br>(.00,.16) | .61<br>(.55,.70) | .42<br>(.30,.47) | .00<br>(.00,.00) | .58<br>(.53,.63) | .40<br>(.26,.46) | .02<br>(.00,.14) | .58<br>(.54,.63) |
| Alcohol use                          | .46<br>(.34,.54) | .03<br>(.00,.13) | .51<br>(.46,.55) | .29<br>(.07,.49) | .13<br>(.00,.29) | .58<br>(.50,.66) | .53<br>(.40,.57) | .00<br>(.00,.00) | .47<br>(.43,.52) | .40<br>(.26,.53) | .09<br>(.00,.21) | .51<br>(.47,.56) |
| Ever smoked                          | .48<br>(.41,.52) | .00<br>(.00,.06) | .52<br>(.48,.55) | .45<br>(.34,.51) | .00<br>(.00,.08) | .55<br>(.49,.61) | .50<br>(.36,.54) | .00<br>(.00,.11) | .50<br>(.46,.55) | .49<br>(.38,.52) | .00<br>(.00,.00) | .51<br>(.48,.55) |
| Ever vaped                           | .33<br>(.21,.42) | .04<br>(.00,.14) | .62<br>(.58,.67) | .35<br>(.14,.44) | .01<br>(.00,.17) | .63<br>(.56,.72) | .30<br>(.15,.43) | .08<br>(.00,.20) | .62<br>(.57,.68) | .28<br>(.13,.41) | .09<br>(.00,.21) | .63<br>(.58,.68) |
| Cognitive enhancers                  | .36<br>(.23,.42) | .01<br>(.00,.11) | .63<br>(.58,.68) | .34<br>(.14,.41) | .00<br>(.00,.14) | .66<br>(.59,.75) | .32<br>(.16,.43) | .06<br>(.00,.18) | .62<br>(.57,.68) | .26<br>(.10,.40) | .10<br>(.00,.23) | .64<br>(.59,.69) |
| Big 5 Agreeableness                  | .22<br>(.18,.27) | .00<br>(.00,.00) | .78<br>(.73,.82) | .30<br>(.19,.37) | .00<br>(.00,.00) | .70<br>(.63,.77) | .17<br>(.11,.23) | .00<br>(.00,.02) | .83<br>(.77,.89) | .24<br>(.19,.29) | .00<br>(.00,.03) | .76<br>(.71,.80) |
| Big 5 Conscientiousness              | .30<br>(.26,.34) | .00<br>(.00,.02) | .70<br>(.66,.74) | .33<br>(.24,.39) | .00<br>(.00,.04) | .67<br>(.61,.74) | .28<br>(.22,.34) | .00<br>(.00,.00) | .72<br>(.66,.77) | .33<br>(.28,.37) | .00<br>(.00,.03) | .67<br>(.63,.72) |

|                                           |                       |                  |                  |                  |                  |                  |                  |                  |                  |                          |                  |                  |
|-------------------------------------------|-----------------------|------------------|------------------|------------------|------------------|------------------|------------------|------------------|------------------|--------------------------|------------------|------------------|
| Big 5 Extraversion                        | .40<br>(.36,.44)      | .00<br>(.00,.02) | .60<br>(.56,.64) | .41<br>(.33,.47) | .00<br>(.00,.05) | .59<br>(.53,.65) | .39<br>(.34,.44) | .00<br>(.00,.03) | .61<br>(.56,.66) | .42<br>(.37,.46)         | .00<br>(.00,.00) | .58<br>(.54,.62) |
| Big 5 Neuroticism                         | .37<br>(.26,.41)      | .00<br>(.00,.09) | .63<br>(.59,.67) | .25<br>(.04,.39) | .07<br>(.00,.21) | .68<br>(.61,.77) | .39<br>(.29,.44) | .00<br>(.00,.08) | .61<br>(.56,.66) | .35<br>(.22,.42)         | .03<br>(.00,.14) | .62<br>(.58,.67) |
| Big 5 Openness                            | .36<br>(.32,.4)       | 0<br>(.00,.02)   | .64<br>(.60,.68) | .37<br>(.28,.43) | .00<br>(.00,.06) | .63<br>(.57,.70) | .36<br>(.30,.41) | .00<br>(.00,.00) | .64<br>(.59,.69) | .38<br>(.33,.42)         | .00<br>(.00,.04) | .62<br>(.58,.66) |
| Self-control                              | .38<br>(.34,.42)      | .00<br>(.00,.03) | .62<br>(.58,.66) | .35<br>(.24,.41) | .00<br>(.00,.07) | .65<br>(.59,.72) | .40<br>(.34,.45) | .00<br>(.00,.04) | .60<br>(.55,.65) | .39<br>(.34,.44)         | .00<br>(.00,.04) | .61<br>(.56,.65) |
| Not planning for the future               | .26<br>(.13,.3)       | .00<br>(.00,.09) | .74<br>(.70,.79) | .29<br>(.16,.35) | .00<br>(.00,.08) | .71<br>(.65,.78) | .17<br>(.01,.29) | .06<br>(.00,.18) | .77<br>(.71,.84) | .25<br>(.13,.30)         | .00<br>(.00,.00) | .75<br>(.70,.80) |
| Ambition                                  | .36<br>(.29,.4)       | .00<br>(.00,.05) | .64<br>(.60,.68) | .34<br>(.22,.41) | .00<br>(.00,.00) | .66<br>(.59,.73) | .37<br>(.26,.41) | .00<br>(.00,.08) | .63<br>(.59,.68) | .37<br>(.27,.41)         | .00<br>(.00,.08) | .63<br>(.59,.68) |
| Physical activity                         | .39<br>(.33,.43)      | .00<br>(.00,.05) | .61<br>(.57,.64) | .39<br>(.26,.45) | .00<br>(.00,.09) | .61<br>(.55,.68) | .40<br>(.30,.44) | .00<br>(.00,.08) | .60<br>(.56,.65) | .40<br>(.28,.44)         | .00<br>(.00,.10) | .60<br>(.56,.64) |
| Health behaviours                         | .52<br>(.42,.58)      | .03<br>(.00,.11) | .45<br>(.42,.48) | .55<br>(.42,.60) | .00<br>(.00,.10) | .45<br>(.40,.51) | .47<br>(.35,.58) | .08<br>(.00,.18) | .45<br>(.41,.49) | .48<br>(.37,.58)         | .07<br>(.00,.17) | .45<br>(.42,.48) |
| Risk taking behaviour                     | .50<br>(.42,.53)      | .00<br>(.00,.06) | .50<br>(.47,.54) | .47<br>(.30,.56) | .04<br>(.00,.17) | .49<br>(.44,.55) | .47<br>(.40,.52) | .00<br>(.00,.06) | .53<br>(.48,.57) | .50<br>(.39,.53)         | .00<br>(.00,.09) | .50<br>(.47,.54) |
| Risky sexual behaviour                    | .60<br>(.52,.63)      | .00<br>(.00,.07) | .40<br>(.37,.43) | .59<br>(.47,.63) | .00<br>(.00,.09) | .41<br>(.37,.47) | .61<br>(.49,.64) | .00<br>(.00,.10) | .39<br>(.36,.43) | .55<br>(.44,.63)         | .06<br>(.00,.16) | .39<br>(.36,.43) |
| Media use                                 | .51<br>(.48,.55)      | .00<br>(.00,.02) | .49<br>(.45,.52) | .48<br>(.42,.53) | .00<br>(.00,.00) | .52<br>(.47,.58) | .53<br>(.47,.57) | .00<br>(.00,.04) | .47<br>(.43,.51) | .52<br>(.48,.56)         | .00<br>(.00,.00) | .48<br>(.44,.51) |
| Volunteering                              | .44<br>(.36,.47)      | .00<br>(.00,.06) | .56<br>(.53,.60) | .47<br>(.34,.53) | .00<br>(.00,.10) | .53<br>(.47,.59) | .42<br>(.32,.46) | .00<br>(.00,.00) | .58<br>(.54,.63) | .45<br>(.32,.48)         | .00<br>(.00,.11) | .55<br>(.52,.59) |
| Internet dating (scale)                   | .34<br>(.22,.37)      | .00<br>(.00,.09) | .66<br>(.63,.71) | .36<br>(.17,.42) | .00<br>(.00,.14) | .64<br>(.58,.71) | .32<br>(.19,.37) | .00<br>(.00,.11) | .68<br>(.63,.73) | .30<br>(.16,.38)         | .04<br>(.00,.15) | .66<br>(.62,.71) |
| Internet dating (y/n)                     | .31<br>(.23,.35)      | .00<br>(.00,.00) | .69<br>(.65,.73) | .33<br>(.15,.39) | .00<br>(.00,.13) | .67<br>(.61,.74) | .30<br>(.20,.35) | .00<br>(.00,.08) | .70<br>(.65,.75) | .26<br>(.12,.36)         | .06<br>(.00,.18) | .68<br>(.64,.73) |
| Financial literacy: Knowledge of Products | .37<br>(.31,.41)      | .00<br>(.00,.00) | .63<br>(.59,.67) | .44<br>(.30,.50) | .00<br>(.00,.11) | .56<br>(.50,.62) | .31<br>(.23,.36) | .00<br>(.00,.00) | .69<br>(.64,.75) | .38<br>(.25,.43)         | .01<br>(.00,.12) | .61<br>(.57,.66) |
| Financial attitudes and behaviour         | .28<br>(.23,.32)      | .00<br>(.00,.00) | .72<br>(.68,.76) | .28<br>(.13,.35) | .00<br>(.00,.00) | .72<br>(.65,.79) | .28<br>(.21,.33) | .00<br>(.00,.04) | .72<br>(.67,.77) | .29<br>(.22,.34)         | .00<br>(.00,.05) | .71<br>(.66,.75) |
|                                           | Model fitting results |                  |                  | Males only       |                  |                  | Females only     |                  |                  | Same-sex MZ and DZ twins |                  |                  |
| Functional outcome                        | A                     | C                | E                | A                | C                | E                | A                | C                | E                | A                        | C                | E                |
| Wellbeing factor (1st PC)                 | .33<br>(.21,.44)      | .07<br>(.00,.16) | .60<br>(.56,.64) | .36<br>(.16,.42) | .00<br>(.00,.14) | .64<br>(.58,.72) | .28<br>(.15,.42) | .14<br>(.02,.24) | .58<br>(.53,.63) | .22<br>(.09,.35)         | .18<br>(.07,.29) | .60<br>(.56,.64) |
| Adverse mental health factor (1st PC)     | .50<br>(.42,.54)      | .00<br>(.00,.07) | .50<br>(.46,.54) | .33<br>(.09,.49) | .07<br>(.00,.24) | .60<br>(.51,.70) | .54<br>(.46,.59) | .00<br>(.00,.07) | .46<br>(.41,.51) | .52<br>(.37,.56)         | .00<br>(.00,.13) | .48<br>(.44,.53) |

|                                         |                  |                  |                  |                  |                  |                  |                  |                  |                  |                  |                  |                  |
|-----------------------------------------|------------------|------------------|------------------|------------------|------------------|------------------|------------------|------------------|------------------|------------------|------------------|------------------|
| Adverse physical health factor (1st PC) | .39<br>(.27,.43) | .00<br>(.00,.10) | .61<br>(.57,.65) | .37<br>(.23,.45) | .00<br>(.00,.10) | .63<br>(.55,.70) | .36<br>(.20,.45) | .04<br>(.00,.17) | .60<br>(.55,.66) | .32<br>(.17,.44) | .08<br>(.00,.21) | .60<br>(.55,.64) |
| Achieved educational level              | .27<br>(.16,.38) | .16<br>(.07,.24) | .57<br>(.53,.62) | .25<br>(.07,.43) | .15<br>(.01,.28) | .60<br>(.53,.67) | .27<br>(.14,.41) | .17<br>(.06,.27) | .56<br>(.51,.61) | .29<br>(.16,.42) | .14<br>(.03,.25) | .57<br>(.53,.61) |
| Planned educational level               | .40<br>(.29,.46) | .00<br>(.00,.08) | .60<br>(.54,.66) | .41<br>(.21,.50) | .00<br>(.00,.16) | .59<br>(.50,.69) | .39<br>(.24,.47) | .00<br>(.00,.12) | .61<br>(.53,.69) | .43<br>(.25,.49) | .00<br>(.00,.16) | .57<br>(.51,.64) |

Note. MZ=monozygotic; DZ=dizygotic; and genetic (A), shared environmental (C) and non-shared environmental (E) estimates. Scores were corrected for mean age and sex differences (see Methods).

**Table S10.** Model-fit statistics for the univariate twin analyses

| Trait                 | Model fit statistics |            |    |           |      |           |            |        |       |
|-----------------------|----------------------|------------|----|-----------|------|-----------|------------|--------|-------|
|                       | base                 | comparison | ep | minus2LL  | df   | AIC       | diffLL     | diffdf | p     |
| Daily hassles         | Sat                  | NA         | 10 | 203748.14 | 8555 | 186638.14 | NA         | NA     | NA    |
|                       | Sat                  | ACE        | 4  | 24105.26  | 8561 | 6983.26   | -179642.90 | 6      | 1     |
|                       | ACE                  | AE         | 3  | 24105.26  | 8562 | 6981.26   | .00        | 1      | 1     |
|                       | ACE                  | CE         | 3  | 24128.72  | 8562 | 7004.72   | 23.46      | 1      | <.001 |
|                       | ACE                  | E          | 2  | 24293.46  | 8563 | 7167.46   | 188.20     | 2      | <.001 |
| CHAOS                 | Sat                  | NA         | 10 | 26663.68  | 9618 | 7427.68   | NA         | NA     | NA    |
|                       | Sat                  | ACE        | 4  | 26673.53  | 9624 | 7425.53   | 9.85       | 6      | .13   |
|                       | ACE                  | AE         | 3  | 26728.84  | 9625 | 7478.84   | 55.31      | 1      | <.001 |
|                       | ACE                  | CE         | 3  | 26678.52  | 9625 | 7428.52   | 4.99       | 1      | .03   |
|                       | ACE                  | E          | 2  | 2729.57   | 9626 | 8038.57   | 617.04     | 2      | <.001 |
| Childhood experiences | Sat                  | NA         | 10 | 23058.40  | 8547 | 5964.40   | NA         | NA     | NA    |
|                       | Sat                  | ACE        | 4  | 2308.59   | 8553 | 5974.59   | 22.19      | 6      | <.001 |
|                       | ACE                  | AE         | 3  | 23103.77  | 8554 | 5995.77   | 23.18      | 1      | <.001 |
|                       | ACE                  | CE         | 3  | 23187.71  | 8554 | 6079.71   | 107.12     | 1      | <.001 |
|                       | ACE                  | E          | 2  | 24216.00  | 8555 | 7106.01   | 1135.41    | 2      | <.001 |
| Poor sleep quality    | Sat                  | NA         | 10 | 199518.65 | 8396 | 182726.65 | NA         | NA     | NA    |
|                       | Sat                  | ACE        | 4  | 23635.06  | 8402 | 6831.06   | -175883.60 | 6      | 1     |
|                       | ACE                  | AE         | 3  | 23635.54  | 8403 | 6829.54   | .47        | 1      | .49   |
|                       | ACE                  | CE         | 3  | 23651.37  | 8403 | 6845.37   | 16.30      | 1      | <.001 |



|                                     |     |     |    |           |      |          |           |    |       |
|-------------------------------------|-----|-----|----|-----------|------|----------|-----------|----|-------|
|                                     | ACE | E   | 2  | 2382.84   | 8404 | 7012.84  | 185.78    | 2  | <.001 |
| Marriage hopes                      | Sat | NA  | 10 | 103445.93 | 9470 | 84505.93 | NA        | NA | NA    |
|                                     | Sat | ACE | 4  | 26698.55  | 9476 | 7746.55  | -76747.38 | 6  | 1     |
|                                     | ACE | AE  | 3  | 26702.42  | 9477 | 7748.42  | 3.87      | 1  | .05   |
|                                     | ACE | CE  | 3  | 26708.06  | 9477 | 7754.06  | 9.51      | 1  | <.001 |
|                                     | ACE | E   | 2  | 2690.73   | 9478 | 7944.73  | 202.18    | 2  | <.001 |
| Marriage worries                    | Sat | NA  | 10 | 86643.00  | 9470 | 67703.00 | NA        | NA | NA    |
|                                     | Sat | ACE | 4  | 26591.80  | 9476 | 7639.80  | -60051.20 | 6  | 1     |
|                                     | ACE | AE  | 3  | 26591.88  | 9477 | 7637.88  | .08       | 1  | .78   |
|                                     | ACE | CE  | 3  | 26632.14  | 9477 | 7678.14  | 4.34      | 1  | <.001 |
|                                     | ACE | E   | 2  | 26922.15  | 9478 | 7966.15  | 33.35     | 2  | <.001 |
| Quality of relationship with twin   | Sat | NA  | 10 | 23541.58  | 9285 | 4971.58  | NA        | NA | NA    |
|                                     | Sat | ACE | 4  | 24035.00  | 9291 | 5453.00  | 493.42    | 6  | <.001 |
|                                     | ACE | AE  | 3  | 24323.76  | 9292 | 5739.76  | 288.76    | 1  | <.001 |
|                                     | ACE | CE  | 3  | 24107.12  | 9292 | 5523.12  | 72.12     | 1  | <.001 |
|                                     | ACE | E   | 2  | 26367.97  | 9293 | 7781.97  | 2332.97   | 2  | <.001 |
| Quality of relationship with mother | Sat | NA  | 10 | 25477.43  | 9202 | 7073.43  | NA        | NA | NA    |
|                                     | Sat | ACE | 4  | 25483.13  | 9208 | 7067.13  | 5.70      | 6  | .46   |
|                                     | ACE | AE  | 3  | 25483.13  | 9209 | 7065.13  | .00       | 1  | .94   |
|                                     | ACE | CE  | 3  | 25584.97  | 9209 | 7166.97  | 101.85    | 1  | <.001 |
|                                     | ACE | E   | 2  | 26132.29  | 9210 | 7712.29  | 649.16    | 2  | <.001 |
| Quality of relationship with father | Sat | NA  | 10 | 24415.63  | 8979 | 6457.63  | NA        | NA | NA    |
|                                     | Sat | ACE | 4  | 24431.95  | 8985 | 6461.95  | 16.32     | 6  | .01   |
|                                     | ACE | AE  | 3  | 24476.15  | 8986 | 6504.15  | 44.20     | 1  | <.001 |
|                                     | ACE | CE  | 3  | 24493.95  | 8986 | 6521.95  | 62.00     | 1  | <.001 |
|                                     | ACE | E   | 2  | 25498.44  | 8987 | 7524.45  | 1066.50   | 2  | <.001 |
| Number of relationships             | Sat | NA  | 10 | 92061.68  | 9468 | 73125.68 | NA        | NA | NA    |
|                                     | Sat | ACE | 4  | 26426.43  | 9474 | 7478.43  | -65635.25 | 6  | 1     |
|                                     | ACE | AE  | 3  | 26426.43  | 9475 | 7476.43  | .00       | 1  | 1     |
|                                     | ACE | CE  | 3  | 26522.11  | 9475 | 7572.11  | 95.68     | 1  | <.001 |

|                           |     |     |    |           |      |           |            |    |       |
|---------------------------|-----|-----|----|-----------|------|-----------|------------|----|-------|
|                           | ACE | E   | 2  | 26876.34  | 9476 | 7924.34   | 449.92     | 2  | <.001 |
| Longest relationship      | Sat | NA  | 10 | 210814.72 | 7958 | 194898.72 | NA         | NA | NA    |
|                           | Sat | ACE | 4  | 22501.62  | 7964 | 6573.62   | -188313.10 | 6  | 1     |
|                           | ACE | AE  | 3  | 22501.62  | 7965 | 6571.62   | .00        | 1  | 1     |
|                           | ACE | CE  | 3  | 22537.70  | 7965 | 6607.70   | 36.08      | 1  | <.001 |
|                           | ACE | E   | 2  | 22623.52  | 7966 | 6691.52   | 121.90     | 2  | <.001 |
| Partner violence          | Sat | NA  | 10 | 232812.01 | 9156 | 21450.01  | NA         | NA | NA    |
|                           | Sat | ACE | 4  | 25889.35  | 9162 | 7565.35   | -206922.70 | 6  | 1     |
|                           | ACE | AE  | 3  | 25889.35  | 9163 | 7563.35   | .00        | 1  | .95   |
|                           | ACE | CE  | 3  | 25903.32  | 9163 | 7577.32   | 13.97      | 1  | <.001 |
|                           | ACE | E   | 2  | 26013.51  | 9164 | 7685.51   | 124.16     | 2  | <.001 |
| Contact with mother       | Sat | NA  | 10 | 10855.31  | 3891 | 3073.31   | NA         | NA | NA    |
|                           | Sat | ACE | 4  | 10859.30  | 3897 | 3065.30   | 3.98       | 6  | .68   |
|                           | ACE | AE  | 3  | 1086.69   | 3898 | 3064.70   | 1.40       | 1  | .24   |
|                           | ACE | CE  | 3  | 10882.63  | 3898 | 3086.63   | 23.33      | 1  | <.001 |
|                           | ACE | E   | 2  | 11071.70  | 3899 | 3273.70   | 212.40     | 2  | <.001 |
| Communication with mother | Sat | NA  | 10 | 10973.81  | 3976 | 3021.81   | NA         | NA | NA    |
|                           | Sat | ACE | 4  | 1099.62   | 3982 | 3026.62   | 16.81      | 6  | .01   |
|                           | ACE | AE  | 3  | 1100.65   | 3983 | 3034.65   | 1.03       | 1  | <.001 |
|                           | ACE | CE  | 3  | 1101.62   | 3983 | 3044.62   | 2.00       | 1  | <.001 |
|                           | ACE | E   | 2  | 11315.30  | 3984 | 3347.30   | 324.68     | 2  | <.001 |
| Contact with father       | Sat | NA  | 10 | 11723.09  | 4223 | 3277.09   | NA         | NA | NA    |
|                           | Sat | ACE | 4  | 11726.58  | 4229 | 3268.58   | 3.49       | 6  | .75   |
|                           | ACE | AE  | 3  | 11752.19  | 4230 | 3292.19   | 25.61      | 1  | <.001 |
|                           | ACE | CE  | 3  | 11729.11  | 4230 | 3269.11   | 2.53       | 1  | .11   |
|                           | ACE | E   | 2  | 12002.87  | 4231 | 354.87    | 276.29     | 2  | <.001 |
| Communication with father | Sat | NA  | 10 | 12312.96  | 4624 | 3064.96   | NA         | NA | NA    |
|                           | Sat | ACE | 4  | 1232.26   | 4630 | 306.26    | 7.30       | 6  | .29   |
|                           | ACE | AE  | 3  | 12446.82  | 4631 | 3184.82   | 126.57     | 1  | <.001 |
|                           | ACE | CE  | 3  | 12326.09  | 4631 | 3064.09   | 5.83       | 1  | .02   |

|                             |     |     |    |           |      |           |            |    |       |
|-----------------------------|-----|-----|----|-----------|------|-----------|------------|----|-------|
|                             | ACE | E   | 2  | 13146.29  | 4632 | 3882.29   | 826.03     | 2  | <.001 |
| Peer pressure               | Sat | NA  | 10 | 221899.64 | 9371 | 203157.64 | NA         | NA | NA    |
|                             | Sat | ACE | 4  | 26349.03  | 9377 | 7595.03   | -19555.60  | 6  | 1     |
|                             | ACE | AE  | 3  | 26349.03  | 9378 | 7593.03   | .00        | 1  | 1     |
|                             | ACE | CE  | 3  | 26392.15  | 9378 | 7636.15   | 43.13      | 1  | <.001 |
|                             | ACE | E   | 2  | 26599.08  | 9379 | 7841.08   | 25.06      | 2  | <.001 |
| Physical peer victimisation | Sat | NA  | 10 | 271563.35 | 8290 | 254983.35 | NA         | NA | NA    |
|                             | Sat | ACE | 4  | 23449.11  | 8296 | 6857.11   | -248114.23 | 6  | 1     |
|                             | ACE | AE  | 3  | 23449.11  | 8297 | 6855.11   | .00        | 1  | 1     |
|                             | ACE | CE  | 3  | 23464.92  | 8297 | 687.92    | 15.81      | 1  | <.001 |
|                             | ACE | E   | 2  | 23492.48  | 8298 | 6896.48   | 43.36      | 2  | <.001 |
| Social peer victimisation   | Sat | NA  | 10 | 199948.06 | 8289 | 18337.06  | NA         | NA | NA    |
|                             | Sat | ACE | 4  | 23404.92  | 8295 | 6814.92   | -176543.10 | 6  | 1     |
|                             | ACE | AE  | 3  | 23404.92  | 8296 | 6812.92   | .00        | 1  | 1     |
|                             | ACE | CE  | 3  | 2342.37   | 8296 | 6828.37   | 15.46      | 1  | <.001 |
|                             | ACE | E   | 2  | 23524.93  | 8297 | 693.93    | 12.01      | 2  | <.001 |
| Verbal peer victimisation   | Sat | NA  | 10 | 199897.34 | 8288 | 183321.34 | NA         | NA | NA    |
|                             | Sat | ACE | 4  | 23403.06  | 8294 | 6815.06   | -176494.28 | 6  | 1     |
|                             | ACE | AE  | 3  | 23403.06  | 8295 | 6813.06   | .00        | 1  | 1     |
|                             | ACE | CE  | 3  | 23429.65  | 8295 | 6839.65   | 26.59      | 1  | <.001 |
|                             | ACE | E   | 2  | 23552.61  | 8296 | 696.61    | 149.56     | 2  | <.001 |
| Cyber peer victimisation    | Sat | NA  | 10 | 20792.94  | 8287 | 191346.94 | NA         | NA | NA    |
|                             | Sat | ACE | 4  | 23387.41  | 8293 | 6801.41   | -184533.50 | 6  | 1     |
|                             | ACE | AE  | 3  | 23387.41  | 8294 | 6799.41   | .00        | 1  | 1     |
|                             | ACE | CE  | 3  | 23425.32  | 8294 | 6837.33   | 37.91      | 1  | <.001 |
|                             | ACE | E   | 2  | 23558.45  | 8295 | 6968.45   | 171.04     | 2  | <.001 |
| Physical peer Perpetration  | Sat | NA  | 10 | 288891.57 | 8288 | 272315.57 | NA         | NA | NA    |
|                             | Sat | ACE | 4  | 23459.54  | 8294 | 6871.54   | -265432.00 | 6  | 1     |
|                             | ACE | AE  | 3  | 23459.54  | 8295 | 6869.54   | .00        | 1  | 1     |
|                             | ACE | CE  | 3  | 23467.76  | 8295 | 6877.76   | 8.22       | 1  | <.001 |

|                               |     |     |    |           |      |           |            |    |       |
|-------------------------------|-----|-----|----|-----------|------|-----------|------------|----|-------|
|                               | ACE | E   | 2  | 23481.27  | 8296 | 6889.27   | 21.74      | 2  | <.001 |
| Social peer Perpetration      | Sat | NA  | 10 | 252019.20 | 8286 | 235447.20 | NA         | NA | NA    |
|                               | Sat | ACE | 4  | 23455.67  | 8292 | 6871.67   | -228563.50 | 6  | 1     |
|                               | ACE | AE  | 3  | 23455.67  | 8293 | 6869.67   | .00        | 1  | 1     |
|                               | ACE | CE  | 3  | 23463.30  | 8293 | 6877.30   | 7.63       | 1  | .01   |
|                               | ACE | E   | 2  | 23485.42  | 8294 | 6897.42   | 29.75      | 2  | <.001 |
| Verbal peer Perpetration      | Sat | NA  | 10 | 92029.05  | 8287 | 75455.05  | NA         | NA | NA    |
|                               | Sat | ACE | 4  | 23404.15  | 8293 | 6818.15   | -68624.90  | 6  | 1     |
|                               | ACE | AE  | 3  | 23404.15  | 8294 | 6816.15   | .00        | 1  | 1     |
|                               | ACE | CE  | 3  | 23443.75  | 8294 | 6855.75   | 39.60      | 1  | <.001 |
|                               | ACE | E   | 2  | 23564.36  | 8295 | 6974.36   | 16.21      | 2  | <.001 |
| Cyber peer Perpetration       | Sat | NA  | 10 | 257365.80 | 8287 | 240791.80 | NA         | NA | NA    |
|                               | Sat | ACE | 4  | 23514.86  | 8293 | 6928.86   | -23385.90  | 6  | 1     |
|                               | ACE | AE  | 3  | 23514.86  | 8294 | 6926.86   | .00        | 1  | 1     |
|                               | ACE | CE  | 3  | 23533.88  | 8294 | 6945.88   | 19.02      | 1  | <.001 |
|                               | ACE | E   | 2  | 23562.62  | 8295 | 6972.62   | 47.77      | 2  | <.001 |
| Parental role aspirations     | Sat | NA  | 10 | 188961.60 | 8565 | 171831.60 | NA         | NA | NA    |
|                               | Sat | ACE | 4  | 24085.84  | 8571 | 6943.84   | -164875.80 | 6  | 1     |
|                               | ACE | AE  | 3  | 24085.84  | 8572 | 6941.84   | .00        | 1  | 1     |
|                               | ACE | CE  | 3  | 24124.17  | 8572 | 698.17    | 38.33      | 1  | <.001 |
|                               | ACE | E   | 2  | 2431.62   | 8573 | 7164.62   | 224.78     | 2  | <.001 |
| Occupational role aspirations | Sat | NA  | 10 | 213057.49 | 8570 | 195917.49 | NA         | NA | NA    |
|                               | Sat | ACE | 4  | 24217.93  | 8576 | 7065.93   | -188839.60 | 6  | 1     |
|                               | ACE | AE  | 3  | 24217.93  | 8577 | 7063.93   | .00        | 1  | 1     |
|                               | ACE | CE  | 3  | 2424.52   | 8577 | 7086.52   | 22.59      | 1  | <.001 |
|                               | ACE | E   | 2  | 24347.02  | 8578 | 7191.02   | 129.09     | 2  | <.001 |
| Homecare role aspirations     | Sat | NA  | 10 | 97251.28  | 8570 | 80111.28  | NA         | NA | NA    |
|                               | Sat | ACE | 4  | 24007.24  | 8576 | 6855.24   | -73244.04  | 6  | 1     |
|                               | ACE | AE  | 3  | 24007.24  | 8577 | 6853.24   | .00        | 1  | 1     |
|                               | ACE | CE  | 3  | 24066.39  | 8577 | 6912.39   | 59.15      | 1  | <.001 |

|                                      |     |     |    |           |      |           |           |    |       |
|--------------------------------------|-----|-----|----|-----------|------|-----------|-----------|----|-------|
|                                      | ACE | E   | 2  | 24326.41  | 8578 | 717.41    | 319.17    | 2  | <.001 |
| Importance of Relationships          | Sat | NA  | 10 | 243327.33 | 9572 | 224183.33 | NA        | NA | NA    |
|                                      | Sat | ACE | 4  | 26886.81  | 9578 | 773.81    | -21644.50 | 6  | 1     |
|                                      | ACE | AE  | 3  | 26886.81  | 9579 | 7728.81   | .00       | 1  | 1     |
|                                      | ACE | CE  | 3  | 26977.15  | 9579 | 7819.15   | 9.34      | 1  | <.001 |
|                                      | ACE | E   | 2  | 2717.85   | 9580 | 801.86    | 284.05    | 2  | <.001 |
| Achievement Motivation               | Sat | NA  | 10 | 102552.96 | 9571 | 8341.96   | NA        | NA | NA    |
|                                      | Sat | ACE | 4  | 26913.42  | 9577 | 7759.42   | -75639.54 | 6  | 1     |
|                                      | ACE | AE  | 3  | 26913.42  | 9578 | 7757.42   | .00       | 1  | 1     |
|                                      | ACE | CE  | 3  | 26959.43  | 9578 | 7803.43   | 46.01     | 1  | <.001 |
|                                      | ACE | E   | 2  | 27209.09  | 9579 | 8051.09   | 295.68    | 2  | <.001 |
| Purpose in Life                      | Sat | NA  | 10 | 26721.08  | 9564 | 7593.08   | NA        | NA | NA    |
|                                      | Sat | ACE | 4  | 26729.33  | 9570 | 7589.33   | 8.25      | 6  | .22   |
|                                      | ACE | AE  | 3  | 26729.36  | 9571 | 7587.36   | .03       | 1  | .85   |
|                                      | ACE | CE  | 3  | 26783.73  | 9571 | 7641.73   | 54.40     | 1  | <.001 |
|                                      | ACE | E   | 2  | 27138.07  | 9572 | 7994.07   | 408.74    | 2  | <.001 |
| Importance of democracy and equality | Sat | NA  | 10 | 92815.68  | 9545 | 73725.68  | NA        | NA | NA    |
|                                      | Sat | ACE | 4  | 26708.38  | 9551 | 7606.38   | -66107.31 | 6  | 1     |
|                                      | ACE | AE  | 3  | 26708.38  | 9552 | 7604.38   | .00       | 1  | 1     |
|                                      | ACE | CE  | 3  | 26792.29  | 9552 | 7688.29   | 83.92     | 1  | <.001 |
|                                      | ACE | E   | 2  | 27097.20  | 9553 | 7991.20   | 388.83    | 2  | <.001 |
| Environmental concerns               | Sat | NA  | 10 | 26476.05  | 9556 | 7364.05   | NA        | NA | NA    |
|                                      | Sat | ACE | 4  | 26486.36  | 9562 | 7362.36   | 1.31      | 6  | .11   |
|                                      | ACE | AE  | 3  | 26486.36  | 9563 | 736.36    | .00       | 1  | .98   |
|                                      | ACE | CE  | 3  | 26588.83  | 9563 | 7462.83   | 102.47    | 1  | <.001 |
|                                      | ACE | E   | 2  | 27134.74  | 9564 | 8006.74   | 648.38    | 2  | <.001 |
| Religiosity                          | Sat | NA  | 10 | 24543.75  | 9381 | 5781.75   | NA        | NA | NA    |
|                                      | Sat | ACE | 4  | 24577.91  | 9387 | 5803.91   | 34.15     | 6  | <.001 |
|                                      | ACE | AE  | 3  | 24764.16  | 9388 | 5988.16   | 186.25    | 1  | <.001 |
|                                      | ACE | CE  | 3  | 24636.37  | 9388 | 586.37    | 58.46     | 1  | <.001 |

|                       |     |     |    |           |      |           |            |    |       |
|-----------------------|-----|-----|----|-----------|------|-----------|------------|----|-------|
|                       | ACE | E   | 2  | 26598.44  | 9389 | 782.44    | 202.54     | 2  | <.001 |
| Importance of leisure | Sat | NA  | 10 | 81758.02  | 8392 | 64974.02  | NA         | NA | NA    |
|                       | Sat | ACE | 4  | 23518.89  | 8398 | 6722.89   | -58239.13  | 6  | 1     |
|                       | ACE | AE  | 3  | 23518.89  | 8399 | 672.89    | .00        | 1  | 1     |
|                       | ACE | CE  | 3  | 23567.01  | 8399 | 6769.01   | 48.12      | 1  | <.001 |
|                       | ACE | E   | 2  | 2384.90   | 8400 | 704.90    | 322.01     | 2  | <.001 |
| Alcohol use           | Sat | NA  | 10 | 21462.52  | 7702 | 6058.52   | NA         | NA | NA    |
|                       | Sat | ACE | 4  | 21476.33  | 7708 | 606.33    | 13.80      | 6  | .03   |
|                       | ACE | AE  | 3  | 21476.80  | 7709 | 6058.80   | .47        | 1  | .49   |
|                       | ACE | CE  | 3  | 21527.10  | 7709 | 6109.10   | 5.77       | 1  | <.001 |
|                       | ACE | E   | 2  | 21861.45  | 7710 | 6441.45   | 385.12     | 2  | <.001 |
| Ever smoked           | Sat | NA  | 10 | 2343.90   | 8424 | 6582.90   | NA         | NA | NA    |
|                       | Sat | ACE | 4  | 23444.20  | 8430 | 6584.20   | 13.30      | 6  | .04   |
|                       | ACE | AE  | 3  | 23444.20  | 8431 | 6582.20   | .00        | 1  | 1     |
|                       | ACE | CE  | 3  | 23527.94  | 8431 | 6665.94   | 83.74      | 1  | <.001 |
|                       | ACE | E   | 2  | 2393.92   | 8432 | 7066.92   | 486.71     | 2  | <.001 |
| Ever vaped            | Sat | NA  | 10 | 23634.84  | 8420 | 6794.84   | NA         | NA | NA    |
|                       | Sat | ACE | 4  | 23644.76  | 8426 | 6792.77   | 9.92       | 6  | .13   |
|                       | ACE | AE  | 3  | 23645.58  | 8427 | 6791.58   | .81        | 1  | .37   |
|                       | ACE | CE  | 3  | 23671.06  | 8427 | 6817.06   | 26.30      | 1  | <.001 |
|                       | ACE | E   | 2  | 23911.70  | 8428 | 7055.70   | 266.93     | 2  | <.001 |
| Cognitive enhancers   | Sat | NA  | 10 | 94272.52  | 8338 | 77596.52  | NA         | NA | NA    |
|                       | Sat | ACE | 4  | 23486.58  | 8344 | 6798.58   | -70785.94  | 6  | 1     |
|                       | ACE | AE  | 3  | 23486.62  | 8345 | 6796.62   | .04        | 1  | .84   |
|                       | ACE | CE  | 3  | 23514.74  | 8345 | 6824.74   | 28.15      | 1  | <.001 |
|                       | ACE | E   | 2  | 2371.52   | 8346 | 7018.52   | 223.94     | 2  | <.001 |
| Big 5 Agreeableness   | Sat | NA  | 10 | 280057.95 | 9277 | 261503.95 | NA         | NA | NA    |
|                       | Sat | ACE | 4  | 26268.86  | 9283 | 7702.87   | -253789.10 | 6  | 1     |
|                       | ACE | AE  | 3  | 26268.86  | 9284 | 770.87    | .00        | 1  | 1     |
|                       | ACE | CE  | 3  | 26305.49  | 9284 | 7737.49   | 36.62      | 1  | <.001 |

|                             |     |     |    |           |      |           |            |    |       |
|-----------------------------|-----|-----|----|-----------|------|-----------|------------|----|-------|
|                             | ACE | E   | 2  | 26356.65  | 9285 | 7786.65   | 87.79      | 2  | <.001 |
| Big 5 Conscientiousness     | Sat | NA  | 10 | 25000.84  | 9264 | 231472.84 | NA         | NA | NA    |
|                             | Sat | ACE | 4  | 26102.90  | 9270 | 7562.90   | -223897.94 | 6  | 1     |
|                             | ACE | AE  | 3  | 26102.90  | 9271 | 756.90    | .00        | 1  | 1     |
|                             | ACE | CE  | 3  | 26163.02  | 9271 | 7621.02   | 6.12       | 1  | <.001 |
|                             | ACE | E   | 2  | 26266.96  | 9272 | 7722.96   | 164.06     | 2  | <.001 |
| Big 5 Extraversion          | Sat | NA  | 10 | 225376.56 | 9314 | 206748.56 | NA         | NA | NA    |
|                             | Sat | ACE | 4  | 26115.69  | 9320 | 7475.69   | -19926.87  | 6  | 1     |
|                             | ACE | AE  | 3  | 26115.69  | 9321 | 7473.69   | .00        | 1  | 1     |
|                             | ACE | CE  | 3  | 26208.45  | 9321 | 7566.45   | 92.76      | 1  | <.001 |
|                             | ACE | E   | 2  | 26442.47  | 9322 | 7798.47   | 326.78     | 2  | <.001 |
| Big 5 Neuroticism           | Sat | NA  | 10 | 98332.34  | 9327 | 79678.34  | NA         | NA | NA    |
|                             | Sat | ACE | 4  | 26209.03  | 9333 | 7543.03   | -72123.32  | 6  | 1     |
|                             | ACE | AE  | 3  | 26209.03  | 9334 | 7541.03   | .00        | 1  | 1     |
|                             | ACE | CE  | 3  | 26246.70  | 9334 | 7578.70   | 37.67      | 1  | <.001 |
|                             | ACE | E   | 2  | 2649.22   | 9335 | 782.22    | 281.20     | 2  | <.001 |
| Big 5 Openness              | Sat | NA  | 10 | 230214.10 | 9298 | 211618.10 | NA         | NA | NA    |
|                             | Sat | ACE | 4  | 26155.91  | 9304 | 7547.91   | -204058.20 | 6  | 1     |
|                             | ACE | AE  | 3  | 26155.91  | 9305 | 7545.91   | .00        | 1  | 1     |
|                             | ACE | CE  | 3  | 26231.21  | 9305 | 7621.21   | 75.30      | 1  | <.001 |
|                             | ACE | E   | 2  | 2642.55   | 9306 | 7808.55   | 264.64     | 2  | <.001 |
| Self-control                | Sat | NA  | 10 | 225125.98 | 9256 | 206613.98 | NA         | NA | NA    |
|                             | Sat | ACE | 4  | 25998.61  | 9262 | 7474.61   | -199127.40 | 6  | 1     |
|                             | ACE | AE  | 3  | 25998.61  | 9263 | 7472.61   | .00        | 1  | 1     |
|                             | ACE | CE  | 3  | 26069.58  | 9263 | 7543.58   | 7.97       | 1  | <.001 |
|                             | ACE | E   | 2  | 26282.19  | 9264 | 7754.19   | 283.57     | 2  | <.001 |
| Not planning for the future | Sat | NA  | 10 | 230139.14 | 9248 | 211643.14 | NA         | NA | NA    |
|                             | Sat | ACE | 4  | 26123.01  | 9254 | 7615.02   | -204016.10 | 6  | 1     |
|                             | ACE | AE  | 3  | 26123.02  | 9255 | 7613.02   | .00        | 1  | .98   |
|                             | ACE | CE  | 3  | 26138.49  | 9255 | 7628.49   | 15.47      | 1  | <.001 |

|                        |     |     |    |           |      |           |            |    |       |
|------------------------|-----|-----|----|-----------|------|-----------|------------|----|-------|
|                        | ACE | E   | 2  | 26253.87  | 9256 | 7741.87   | 13.85      | 2  | <.001 |
| Ambition               | Sat | NA  | 10 | 188875.72 | 8558 | 171759.72 | NA         | NA | NA    |
|                        | Sat | ACE | 4  | 24077.37  | 8564 | 6949.37   | -164798.30 | 6  | 1     |
|                        | ACE | AE  | 3  | 24077.37  | 8565 | 6947.37   | .00        | 1  | 1     |
|                        | ACE | CE  | 3  | 24124.24  | 8565 | 6994.24   | 46.88      | 1  | <.001 |
|                        | ACE | E   | 2  | 2433.38   | 8566 | 7198.38   | 253.01     | 2  | <.001 |
| Physical activity      | Sat | NA  | 10 | 10281.52  | 9351 | 84108.52  | NA         | NA | NA    |
|                        | Sat | ACE | 4  | 26218.73  | 9357 | 7504.73   | -76591.79  | 6  | 1     |
|                        | ACE | AE  | 3  | 26218.73  | 9358 | 7502.73   | .00        | 1  | 1     |
|                        | ACE | CE  | 3  | 26278.41  | 9358 | 7562.41   | 59.67      | 1  | <.001 |
|                        | ACE | E   | 2  | 2656.54   | 9359 | 7842.54   | 341.80     | 2  | <.001 |
| Health behaviours      | Sat | NA  | 10 | 25919.48  | 9384 | 7151.48   | NA         | NA | NA    |
|                        | Sat | ACE | 4  | 2592.65   | 9390 | 714.65    | 1.17       | 6  | .98   |
|                        | ACE | AE  | 3  | 25921.42  | 9391 | 7139.42   | .77        | 1  | .38   |
|                        | ACE | CE  | 3  | 26026.43  | 9391 | 7244.43   | 105.78     | 1  | <.001 |
|                        | ACE | E   | 2  | 26663.04  | 9392 | 7879.04   | 742.39     | 2  | <.001 |
| Risk taking behaviour  | Sat | NA  | 10 | 25711.05  | 9245 | 7221.05   | NA         | NA | NA    |
|                        | Sat | ACE | 4  | 25737.09  | 9251 | 7235.09   | 26.04      | 6  | <.001 |
|                        | ACE | AE  | 3  | 25737.09  | 9252 | 7233.09   | .00        | 1  | 1     |
|                        | ACE | CE  | 3  | 25825.71  | 9252 | 7321.71   | 88.62      | 1  | <.001 |
|                        | ACE | E   | 2  | 2624.64   | 9253 | 7734.64   | 503.55     | 2  | <.001 |
| Risky sexual behaviour | Sat | NA  | 10 | 24751.96  | 9021 | 6709.96   | NA         | NA | NA    |
|                        | Sat | ACE | 4  | 24767.85  | 9027 | 6713.85   | 15.88      | 6  | .01   |
|                        | ACE | AE  | 3  | 24767.85  | 9028 | 6711.85   | .00        | 1  | 1     |
|                        | ACE | CE  | 3  | 24923.44  | 9028 | 6867.45   | 155.60     | 1  | <.001 |
|                        | ACE | E   | 2  | 25616.64  | 9029 | 7558.64   | 848.80     | 2  | <.001 |
| Media use              | Sat | NA  | 10 | 90582.66  | 9300 | 71982.66  | NA         | NA | NA    |
|                        | Sat | ACE | 4  | 25809.09  | 9306 | 7197.09   | -64773.57  | 6  | 1     |
|                        | ACE | AE  | 3  | 25809.09  | 9307 | 7195.09   | .00        | 1  | 1     |
|                        | ACE | CE  | 3  | 25967.72  | 9307 | 7353.72   | 158.63     | 1  | <.001 |



|                                           |                      |            |    |           |      |           |            |        |       |
|-------------------------------------------|----------------------|------------|----|-----------|------|-----------|------------|--------|-------|
|                                           | ACE                  | E          | 2  | 26382.51  | 9308 | 7766.51   | 573.42     | 2      | <.001 |
| Volunteering                              | Sat                  | NA         | 10 | 85527.56  | 9389 | 66749.56  | NA         | NA     | NA    |
|                                           | Sat                  | ACE        | 4  | 26225.78  | 9395 | 7435.78   | -59301.78  | 6      | 1     |
|                                           | ACE                  | AE         | 3  | 26225.78  | 9396 | 7433.78   | .00        | 1      | 1     |
|                                           | ACE                  | CE         | 3  | 26296.77  | 9396 | 7504.77   | 7.99       | 1      | <.001 |
|                                           | ACE                  | E          | 2  | 26663.54  | 9397 | 7869.54   | 437.76     | 2      | <.001 |
| Internet dating                           | Sat                  | NA         | 10 | 183925.32 | 9270 | 165385.32 | NA         | NA     | NA    |
| (scale)                                   | Sat                  | ACE        | 4  | 26077.49  | 9276 | 7525.49   | -157847.80 | 6      | 1     |
|                                           | ACE                  | AE         | 3  | 26077.49  | 9277 | 7523.49   | .00        | 1      | 1     |
|                                           | ACE                  | CE         | 3  | 26108.88  | 9277 | 7554.88   | 31.39      | 1      | <.001 |
|                                           | ACE                  | E          | 2  | 26325.62  | 9278 | 7769.62   | 248.14     | 2      | <.001 |
| Internet dating                           | Sat                  | NA         | 10 | 222561.62 | 9301 | 203959.62 | NA         | NA     | NA    |
| (y/n)                                     | Sat                  | ACE        | 4  | 26203.83  | 9307 | 7589.83   | -196357.80 | 6      | 1     |
|                                           | ACE                  | AE         | 3  | 26203.83  | 9308 | 7587.83   | .00        | 1      | 1     |
|                                           | ACE                  | CE         | 3  | 26237.29  | 9308 | 7621.30   | 33.46      | 1      | <.001 |
|                                           | ACE                  | E          | 2  | 26415.83  | 9309 | 7797.84   | 212.00     | 2      | <.001 |
| Financial literacy: Knowledge of Products | Sat                  | NA         | 10 | 215394.11 | 9144 | 197106.11 | NA         | NA     | NA    |
|                                           | Sat                  | ACE        | 4  | 25678.98  | 9150 | 7378.98   | -189715.13 | 6      | 1     |
|                                           | ACE                  | AE         | 3  | 25678.98  | 9151 | 7376.98   | .00        | 1      | 1     |
|                                           | ACE                  | CE         | 3  | 25733.55  | 9151 | 7431.55   | 54.57      | 1      | <.001 |
|                                           | ACE                  | E          | 2  | 25955.41  | 9152 | 7651.41   | 276.43     | 2      | <.001 |
| Financial attitudes and behaviour         | Sat                  | NA         | 10 | 234826.91 | 9142 | 216542.91 | NA         | NA     | NA    |
|                                           | Sat                  | ACE        | 4  | 25828.75  | 9148 | 7532.75   | -208998.20 | 6      | 1     |
|                                           | ACE                  | AE         | 3  | 25828.75  | 9149 | 753.75    | .00        | 1      | 1     |
|                                           | ACE                  | CE         | 3  | 25869.23  | 9149 | 7571.23   | 4.48       | 1      | <.001 |
|                                           | ACE                  | E          | 2  | 2598.04   | 9150 | 768.04    | 151.29     | 2      | <.001 |
|                                           | Model fit statistics |            |    |           |      |           |            |        |       |
| Functional outcome                        | base                 | comparison | ep | minus2LL  | df   | AIC       | diffLL     | diffdf | p     |
| Wellbeing factor (1st PC)                 | Sat                  | NA         | 10 | 25528.59  | 9122 | 7284.59   | NA         | NA     | NA    |
|                                           | Sat                  | ACE        | 4  | 25529.45  | 9128 | 7273.45   | .86        | 6      | .99   |

|                                         |     |     |    |           |      |           |           |    |       |
|-----------------------------------------|-----|-----|----|-----------|------|-----------|-----------|----|-------|
|                                         | ACE | AE  | 3  | 25532.21  | 9129 | 7274.21   | 2.76      | 1  | .1    |
|                                         | ACE | CE  | 3  | 2556.23   | 9129 | 7302.23   | 3.78      | 1  | <.001 |
|                                         | ACE | E   | 2  | 25898.17  | 9130 | 7638.17   | 368.72    | 2  | <.001 |
| Adverse mental health factor (1st PC)   | Sat | NA  | 10 | 20002.03  | 7168 | 5666.03   | NA        | NA | NA    |
|                                         | Sat | ACE | 4  | 20006.85  | 7174 | 5658.85   | 4.82      | 6  | .57   |
|                                         | ACE | AE  | 3  | 20006.85  | 7175 | 5656.85   | .00       | 1  | 1     |
|                                         | ACE | CE  | 3  | 20074.95  | 7175 | 5724.95   | 68.10     | 1  | <.001 |
|                                         | ACE | E   | 2  | 20376.06  | 7176 | 6024.06   | 369.21    | 2  | <.001 |
| Adverse physical health factor (1st PC) | Sat | NA  | 10 | 95542.78  | 7714 | 80114.78  | NA        | NA | NA    |
|                                         | Sat | ACE | 4  | 21596.43  | 7720 | 6156.43   | -73946.35 | 6  | 1     |
|                                         | ACE | AE  | 3  | 21596.43  | 7721 | 6154.43   | .00       | 1  | 1     |
|                                         | ACE | CE  | 3  | 21631.35  | 7721 | 6189.35   | 34.92     | 1  | <.001 |
|                                         | ACE | E   | 2  | 21867.07  | 7722 | 6423.07   | 27.65     | 2  | <.001 |
| Achieved educational level              | Sat | NA  | 10 | 26008.17  | 9324 | 736.17    | NA        | NA | NA    |
|                                         | Sat | ACE | 4  | 26012.79  | 9330 | 7352.79   | 4.62      | 6  | .59   |
|                                         | ACE | AE  | 3  | 26025.90  | 9331 | 7363.90   | 13.11     | 1  | <.001 |
|                                         | ACE | CE  | 3  | 26035.29  | 9331 | 7373.29   | 22.51     | 1  | <.001 |
|                                         | ACE | E   | 2  | 26472.93  | 9332 | 7808.93   | 46.14     | 2  | <.001 |
| Planned educational level               | Sat | NA  | 10 | 155685.64 | 6119 | 143447.64 | NA        | NA | NA    |
|                                         | Sat | ACE | 4  | 17254.87  | 6125 | 5004.87   | -13843.80 | 6  | 1     |
|                                         | ACE | AE  | 3  | 17254.87  | 6126 | 5002.87   | .00       | 1  | 1     |
|                                         | ACE | CE  | 3  | 17281.48  | 6126 | 5029.48   | 26.60     | 1  | <.001 |
|                                         | ACE | E   | 2  | 17379.29  | 6127 | 5125.29   | 124.42    | 2  | <.001 |

*Note.* The ACE model was included for completeness even though in some cases more parsimonious models show better fit; ep= estimated parameters; -2LL= minus 2 log-likelihood; df= degrees of freedom; AIC= Akaike's information criterion; diffLL= log-likelihood-ratio  $\chi^2$  test comparing models to base; diffdf= difference in degrees of freedom; Sat= Saturated model representing the perfect fit; ACE= the full ACE model decomposing the phenotypic variation into genetic, common environmental and unique environmental influences; AE= a sub-model decomposing the phenotypic variation into genetic and unique environmental influences; CE= a sub-model decomposing the phenotypic variation into shared and unique environmental influences; E= a sub-model explaining the phenotypic variation to be accounted for by unique environmental influences; p= probability value of the model fit.

**Table S11.** Model-fit statistics for the sex limitation twin analyses.

| Trait                             | Model fit statistics |            |    |          |      |         |           |        |      |
|-----------------------------------|----------------------|------------|----|----------|------|---------|-----------|--------|------|
|                                   | base                 | comparison | ep | minus2LL | df   | AIC     | diffLL    | diffdf | p    |
| Daily hassles                     | FullHetACE           |            | 9  | 24102.23 | 8556 | 699.23  |           |        |      |
|                                   | FullHetACE           | HetACE     | 8  | 24102.23 | 8557 | 6988.23 | -5.46E-11 | 1      | 1.00 |
|                                   | cFullHetACE          | HetACE     | 8  | 24102.23 | 8557 | 6988.23 | -1.06E+02 | 1      | 1.00 |
|                                   | HetACE               | HomACE     | 5  | 24104.31 | 8560 | 6984.31 | 2.08E+00  | 3      | .56  |
| CHAOS                             | FullHetACE           |            | 9  | 26652.85 | 9619 | 7414.85 |           |        |      |
|                                   | FullHetACE           | HetACE     | 8  | 26652.85 | 9620 | 7412.85 | .00       | 1      | 1.00 |
|                                   | cFullHetACE          | HetACE     | 8  | 26652.85 | 9620 | 7412.85 | -32.89    | 1      | 1.00 |
|                                   | HetACE               | HomACE     | 5  | 26671.55 | 9623 | 7425.55 | 18.70     | 3      | .00  |
| Childhood experiences             | FullHetACE           |            | 9  | 23022.83 | 8548 | 5926.83 |           |        |      |
|                                   | FullHetACE           | HetACE     | 8  | 23031.32 | 8549 | 5933.32 | 8.49      | 1      | .00  |
|                                   | cFullHetACE          | HetACE     | 8  | 23031.32 | 8549 | 5933.32 | 8.49      | 1      | .00  |
|                                   | HetACE               | HomACE     | 5  | 2308.42  | 8552 | 5976.42 | 49.10     | 3      | .00  |
| Poor sleep quality                | FullHetACE           |            | 9  | 23605.06 | 8397 | 6811.06 |           |        |      |
|                                   | FullHetACE           | HetACE     | 8  | 23605.06 | 8398 | 6809.06 | .00       | 1      | 1.00 |
|                                   | cFullHetACE          | HetACE     | 8  | 23605.06 | 8398 | 6809.06 | -78.49    | 1      | 1.00 |
|                                   | HetACE               | HomACE     | 5  | 23634.52 | 8401 | 6832.52 | 29.46     | 3      | .00  |
| Marriage hopes                    | FullHetACE           |            | 9  | 26681.07 | 9471 | 7739.07 |           |        |      |
|                                   | FullHetACE           | HetACE     | 8  | 26681.07 | 9472 | 7737.07 | .00       | 1      | 1.00 |
|                                   | cFullHetACE          | HetACE     | 8  | 26681.07 | 9472 | 7737.07 | -124.78   | 1      | 1.00 |
|                                   | HetACE               | HomACE     | 5  | 26697.35 | 9475 | 7747.35 | 16.28     | 3      | .00  |
| Marriage worries                  | FullHetACE           |            | 9  | 26579.92 | 9471 | 7637.92 |           |        |      |
|                                   | FullHetACE           | HetACE     | 8  | 26582.95 | 9472 | 7638.95 | 3.03      | 1      | .08  |
|                                   | cFullHetACE          | HetACE     | 8  | 26582.95 | 9472 | 7638.95 | 3.03      | 1      | .08  |
|                                   | HetACE               | HomACE     | 5  | 26591.19 | 9475 | 7641.19 | 8.24      | 3      | .04  |
| Quality of relationship with twin | FullHetACE           |            | 9  | 2402.01  | 9286 | 5448.01 |           |        |      |
|                                   | FullHetACE           | HetACE     | 8  | 2402.01  | 9287 | 5446.01 | .00       | 1      | 1.00 |
|                                   | cFullHetACE          | HetACE     | 8  | 2402.01  | 9287 | 5446.01 | -359.54   | 1      | 1.00 |

|                                     |             |        |   |          |      |         |         |   |      |
|-------------------------------------|-------------|--------|---|----------|------|---------|---------|---|------|
|                                     | HetACE      | HomACE | 5 | 24029.5  | 9290 | 5449.50 | 9.49    | 3 | .02  |
| Quality of relationship with mother | FullHetACE  |        | 9 | 25457.82 | 9203 | 7051.82 |         |   |      |
|                                     | FullHetACE  | HetACE | 8 | 25463.85 | 9204 | 7055.85 | 6.03    | 1 | .01  |
|                                     | cFullHetACE | HetACE | 8 | 25463.85 | 9204 | 7055.85 | 6.03    | 1 | .01  |
|                                     | HetACE      | HomACE | 5 | 25481.03 | 9207 | 7067.03 | 17.18   | 3 | .00  |
| Quality of relationship with father | FullHetACE  |        | 9 | 24408.14 | 8980 | 6448.14 |         |   |      |
|                                     | FullHetACE  | HetACE | 8 | 2441.35  | 8981 | 6448.35 | 2.21    | 1 | .14  |
|                                     | cFullHetACE | HetACE | 8 | 2441.35  | 8981 | 6448.35 | 2.21    | 1 | .14  |
|                                     | HetACE      | HomACE | 5 | 24428.36 | 8984 | 646.36  | 18.01   | 3 | .00  |
| Number of relationships             | FullHetACE  |        | 9 | 2636.79  | 9469 | 7422.79 |         |   |      |
|                                     | FullHetACE  | HetACE | 8 | 26373.2  | 9470 | 7433.20 | 12.41   | 1 | .00  |
|                                     | cFullHetACE | HetACE | 8 | 26373.2  | 9470 | 7433.20 | -19.85  | 1 | 1.00 |
|                                     | HetACE      | HomACE | 5 | 26424.98 | 9473 | 7478.98 | 51.78   | 3 | .00  |
| Longest relationship                | FullHetACE  |        | 9 | 22486.62 | 7959 | 6568.62 |         |   |      |
|                                     | FullHetACE  | HetACE | 8 | 22486.62 | 7960 | 6566.62 | .00     | 1 | 1.00 |
|                                     | cFullHetACE | HetACE | 8 | 22486.62 | 7960 | 6566.62 | -118.88 | 1 | 1.00 |
|                                     | HetACE      | HomACE | 5 | 22498.99 | 7963 | 6572.99 | 12.37   | 3 | .01  |
| Partner violence                    | FullHetACE  |        | 9 | 25823.2  | 9157 | 7509.20 |         |   |      |
|                                     | FullHetACE  | HetACE | 8 | 25823.2  | 9158 | 7507.20 | .00     | 1 | 1.00 |
|                                     | cFullHetACE | HetACE | 8 | 25823.2  | 9158 | 7507.20 | -39.54  | 1 | 1.00 |
|                                     | HetACE      | HomACE | 5 | 25888.67 | 9161 | 7566.67 | 65.47   | 3 | .00  |
| Contact with mother                 | FullHetACE  |        | 9 | 10833.96 | 3892 | 3049.96 |         |   |      |
|                                     | FullHetACE  | HetACE | 8 | 10833.96 | 3893 | 3047.96 | .00     | 1 | 1.00 |
|                                     | cFullHetACE | HetACE | 8 | 10833.96 | 3893 | 3047.96 | .00     | 1 | 1.00 |
|                                     | HetACE      | HomACE | 5 | 10857.57 | 3896 | 3065.57 | 23.61   | 3 | .00  |
| Communication with mother           | FullHetACE  |        | 9 | 10982.59 | 3977 | 3028.59 |         |   |      |
|                                     | FullHetACE  | HetACE | 8 | 10982.59 | 3978 | 3026.59 | .00     | 1 | 1.00 |
|                                     | cFullHetACE | HetACE | 8 | 10982.59 | 3978 | 3026.59 | -46.96  | 1 | 1.00 |
|                                     | HetACE      | HomACE | 5 | 1099.61  | 3981 | 3028.62 | 8.02    | 3 | .05  |
| Contact with father                 | FullHetACE  |        | 9 | 11709.96 | 4224 | 3261.97 |         |   |      |

|                             |             |        |   |          |      |         |         |   |      |
|-----------------------------|-------------|--------|---|----------|------|---------|---------|---|------|
|                             | FullHetACE  | HetACE | 8 | 11709.96 | 4225 | 3259.97 | .00     | 1 | 1.00 |
|                             | cFullHetACE | HetACE | 8 | 11709.96 | 4225 | 3259.97 | -6.14   | 1 | 1.00 |
|                             | HetACE      | HomACE | 5 | 11724.97 | 4228 | 3268.97 | 15.01   | 3 | .00  |
| Communication with father   | FullHetACE  |        | 9 | 12305.5  | 4625 | 3055.50 |         |   |      |
|                             | FullHetACE  | HetACE | 8 | 12305.5  | 4626 | 3053.50 | .00     | 1 | 1.00 |
|                             | cFullHetACE | HetACE | 8 | 12305.5  | 4626 | 3053.50 | -133.46 | 1 | 1.00 |
|                             | HetACE      | HomACE | 5 | 12319.83 | 4629 | 3061.83 | 14.33   | 3 | .00  |
| Peer pressure               | FullHetACE  |        | 9 | 26332.77 | 9372 | 7588.77 |         |   |      |
|                             | FullHetACE  | HetACE | 8 | 26333.91 | 9373 | 7587.91 | 1.13    | 1 | .29  |
|                             | cFullHetACE | HetACE | 8 | 26333.91 | 9373 | 7587.91 | -12.47  | 1 | 1.00 |
|                             | HetACE      | HomACE | 5 | 26348.63 | 9376 | 7596.63 | 14.72   | 3 | .00  |
| Physical peer victimisation | FullHetACE  |        | 9 | 22545.92 | 8291 | 5963.92 |         |   |      |
|                             | FullHetACE  | HetACE | 8 | 2255.06  | 8292 | 5966.06 | 4.14    | 1 | .04  |
|                             | cFullHetACE | HetACE | 8 | 2255.06  | 8292 | 5966.06 | .00     | 1 | 1.00 |
|                             | HetACE      | HomACE | 5 | 23447.31 | 8295 | 6857.31 | 897.25  | 3 | .00  |
| Social peer victimisation   | FullHetACE  |        | 9 | 23387.85 | 8290 | 6807.85 |         |   |      |
|                             | FullHetACE  | HetACE | 8 | 23387.85 | 8291 | 6805.85 | .00     | 1 | 1.00 |
|                             | cFullHetACE | HetACE | 8 | 23387.85 | 8291 | 6805.85 | -72.13  | 1 | 1.00 |
|                             | HetACE      | HomACE | 5 | 23404.91 | 8294 | 6816.92 | 17.06   | 3 | .00  |
| Verbal peer victimisation   | FullHetACE  |        | 9 | 23354.95 | 8289 | 6776.95 |         |   |      |
|                             | FullHetACE  | HetACE | 8 | 23355.37 | 8290 | 6775.37 | .41     | 1 | .52  |
|                             | cFullHetACE | HetACE | 8 | 23355.37 | 8290 | 6775.37 | -132.86 | 1 | 1.00 |
|                             | HetACE      | HomACE | 5 | 23402.92 | 8293 | 6816.92 | 47.56   | 3 | .00  |
| Cyber peer victimisation    | FullHetACE  |        | 9 | 23381.03 | 8288 | 6805.03 |         |   |      |
|                             | FullHetACE  | HetACE | 8 | 23381.03 | 8289 | 6803.03 | .00     | 1 | 1.00 |
|                             | cFullHetACE | HetACE | 8 | 23381.03 | 8289 | 6803.03 | -85.63  | 1 | 1.00 |
|                             | HetACE      | HomACE | 5 | 23387.39 | 8292 | 6803.39 | 6.36    | 3 | .10  |
| Physical peer Perpetration  | FullHetACE  |        | 9 | 21949.96 | 8289 | 5371.96 |         |   |      |
|                             | FullHetACE  | HetACE | 8 | 2195.37  | 8290 | 537.37  | .41     | 1 | .52  |
|                             | cFullHetACE | HetACE | 8 | 2195.37  | 8290 | 537.37  | .00     | 1 | 1.00 |

|                               |             |        |   |          |      |         |         |   |      |
|-------------------------------|-------------|--------|---|----------|------|---------|---------|---|------|
|                               | HetACE      | HomACE | 5 | 23458.89 | 8293 | 6872.89 | 1508.52 | 3 | .00  |
| Social peer Perpetration      | FullHetACE  |        | 9 | 23445.99 | 8287 | 6871.99 |         |   |      |
|                               | FullHetACE  | HetACE | 8 | 23445.99 | 8288 | 6869.99 | .00     | 1 | 1.00 |
|                               | cFullHetACE | HetACE | 8 | 23445.99 | 8288 | 6869.99 | -162.50 | 1 | 1.00 |
|                               | HetACE      | HomACE | 5 | 23455.44 | 8291 | 6873.44 | 9.44    | 3 | .02  |
| Verbal peer Perpetration      | FullHetACE  |        | 9 | 23192.44 | 8288 | 6616.44 |         |   |      |
|                               | FullHetACE  | HetACE | 8 | 23198.07 | 8289 | 662.08  | 5.63    | 1 | .02  |
|                               | cFullHetACE | HetACE | 8 | 23198.07 | 8289 | 662.08  | -49.68  | 1 | 1.00 |
|                               | HetACE      | HomACE | 5 | 23403.96 | 8292 | 6819.96 | 205.89  | 3 | .00  |
| Cyber peer Perpetration       | FullHetACE  |        | 9 | 23461.85 | 8288 | 6885.85 |         |   |      |
|                               | FullHetACE  | HetACE | 8 | 23461.85 | 8289 | 6883.85 | .00     | 1 | 1.00 |
|                               | cFullHetACE | HetACE | 8 | 23461.85 | 8289 | 6883.85 | -81.68  | 1 | 1.00 |
|                               | HetACE      | HomACE | 5 | 23514.86 | 8292 | 693.86  | 53.01   | 3 | .00  |
| Parental role aspirations     | FullHetACE  |        | 9 | 24069.01 | 8566 | 6937.01 |         |   |      |
|                               | FullHetACE  | HetACE | 8 | 24069.01 | 8567 | 6935.01 | .00     | 1 | 1.00 |
|                               | cFullHetACE | HetACE | 8 | 24069.01 | 8567 | 6935.01 | -11.25  | 1 | 1.00 |
|                               | HetACE      | HomACE | 5 | 24085.72 | 8570 | 6945.72 | 16.71   | 3 | .00  |
| Occupational role aspirations | FullHetACE  |        | 9 | 24212.18 | 8571 | 707.18  |         |   |      |
|                               | FullHetACE  | HetACE | 8 | 24213.11 | 8572 | 7069.11 | .93     | 1 | .33  |
|                               | cFullHetACE | HetACE | 8 | 24213.11 | 8572 | 7069.11 | -28.55  | 1 | 1.00 |
|                               | HetACE      | HomACE | 5 | 24217.93 | 8575 | 7067.93 | 4.82    | 3 | .19  |
| Homecare role aspirations     | FullHetACE  |        | 9 | 2397.03  | 8571 | 6828.03 |         |   |      |
|                               | FullHetACE  | HetACE | 8 | 23977.23 | 8572 | 6833.23 | 7.21    | 1 | .01  |
|                               | cFullHetACE | HetACE | 8 | 23977.23 | 8572 | 6833.23 | -31.77  | 1 | 1.00 |
|                               | HetACE      | HomACE | 5 | 24005.48 | 8575 | 6855.48 | 28.24   | 3 | .00  |
| Importance of Relationships   | FullHetACE  |        | 9 | 26815.63 | 9573 | 7669.63 |         |   |      |
|                               | FullHetACE  | HetACE | 8 | 26829.03 | 9574 | 7681.03 | 13.40   | 1 | .00  |
|                               | cFullHetACE | HetACE | 8 | 26829.03 | 9574 | 7681.03 | -29.01  | 1 | 1.00 |
|                               | HetACE      | HomACE | 5 | 26885.05 | 9577 | 7731.05 | 56.02   | 3 | .00  |
| Achievement Motivation        | FullHetACE  |        | 9 | 26899.51 | 9572 | 7755.51 |         |   |      |

|                                      |             |        |   |          |      |         |         |   |      |
|--------------------------------------|-------------|--------|---|----------|------|---------|---------|---|------|
|                                      | FullHetACE  | HetACE | 8 | 26899.51 | 9573 | 7753.51 | .00     | 1 | 1.00 |
|                                      | cFullHetACE | HetACE | 8 | 26899.51 | 9573 | 7753.51 | .00     | 1 | 1.00 |
|                                      | HetACE      | HomACE | 5 | 26913.25 | 9576 | 7761.25 | 13.73   | 3 | .00  |
| Purpose in Life                      | FullHetACE  |        | 9 | 26724.66 | 9565 | 7594.66 |         |   |      |
|                                      | FullHetACE  | HetACE | 8 | 26724.66 | 9566 | 7592.66 | .00     | 1 | 1.00 |
|                                      | cFullHetACE | HetACE | 8 | 26724.66 | 9566 | 7592.66 | .00     | 1 | 1.00 |
|                                      | HetACE      | HomACE | 5 | 26729.06 | 9569 | 7591.06 | 4.41    | 3 | .22  |
| Importance of democracy and equality | FullHetACE  |        | 9 | 26672.06 | 9546 | 758.06  |         |   |      |
|                                      | FullHetACE  | HetACE | 8 | 26672.06 | 9547 | 7578.06 | .00     | 1 | 1.00 |
|                                      | cFullHetACE | HetACE | 8 | 26672.06 | 9547 | 7578.06 | -3.50   | 1 | 1.00 |
|                                      | HetACE      | HomACE | 5 | 26708.37 | 9550 | 7608.37 | 36.31   | 3 | .00  |
| Environmental concerns               | FullHetACE  |        | 9 | 26469.64 | 9557 | 7355.64 |         |   |      |
|                                      | FullHetACE  | HetACE | 8 | 26471.93 | 9558 | 7355.94 | 2.30    | 1 | .13  |
|                                      | cFullHetACE | HetACE | 8 | 26471.93 | 9558 | 7355.94 | -18.93  | 1 | 1.00 |
|                                      | HetACE      | HomACE | 5 | 26486.35 | 9561 | 7364.35 | 14.41   | 3 | .00  |
| Religiosity                          | FullHetACE  |        | 9 | 24571.78 | 9382 | 5807.78 |         |   |      |
|                                      | FullHetACE  | HetACE | 8 | 24571.78 | 9383 | 5805.78 | .00     | 1 | 1.00 |
|                                      | cFullHetACE | HetACE | 8 | 24571.78 | 9383 | 5805.78 | -182.81 | 1 | 1.00 |
|                                      | HetACE      | HomACE | 5 | 24576.91 | 9386 | 5804.91 | 5.13    | 3 | .16  |
| Importance of leisure                | FullHetACE  |        | 9 | 23511.35 | 8393 | 6725.35 |         |   |      |
|                                      | FullHetACE  | HetACE | 8 | 23512.04 | 8394 | 6724.04 | .69     | 1 | .41  |
|                                      | cFullHetACE | HetACE | 8 | 23512.04 | 8394 | 6724.04 | -12.45  | 1 | 1.00 |
|                                      | HetACE      | HomACE | 5 | 23516.45 | 8397 | 6722.45 | 4.41    | 3 | .22  |
| Alcohol use                          | FullHetACE  |        | 9 | 21449.92 | 7703 | 6043.92 |         |   |      |
|                                      | FullHetACE  | HetACE | 8 | 2145.58  | 7704 | 6042.58 | .66     | 1 | .42  |
|                                      | cFullHetACE | HetACE | 8 | 2145.58  | 7704 | 6042.58 | .00     | 1 | 1.00 |
|                                      | HetACE      | HomACE | 5 | 21476.3  | 7707 | 6062.30 | 25.71   | 3 | .00  |
| Ever smoked                          | FullHetACE  |        | 9 | 23442.9  | 8425 | 6592.90 |         |   |      |
|                                      | FullHetACE  | HetACE | 8 | 23443.07 | 8426 | 6591.07 | .17     | 1 | .68  |
|                                      | cFullHetACE | HetACE | 8 | 23443.07 | 8426 | 6591.07 | -51.83  | 1 | 1.00 |

|                         |             |        |   |          |      |         |         |   |      |
|-------------------------|-------------|--------|---|----------|------|---------|---------|---|------|
|                         | HetACE      | HomACE | 5 | 23443.71 | 8429 | 6585.71 | .63     | 3 | .89  |
| Ever vaped              | FullHetACE  |        | 9 | 2362.67  | 8421 | 6778.67 |         |   |      |
|                         | FullHetACE  | HetACE | 8 | 2362.67  | 8422 | 6776.67 | .00     | 1 | 1.00 |
|                         | cFullHetACE | HetACE | 8 | 2362.67  | 8422 | 6776.67 | -67.70  | 1 | 1.00 |
|                         | HetACE      | HomACE | 5 | 2364.75  | 8425 | 679.75  | 2.07    | 3 | .00  |
| Cognitive enhancers     | FullHetACE  |        | 9 | 23423.13 | 8339 | 6745.14 |         |   |      |
|                         | FullHetACE  | HetACE | 8 | 23427.72 | 8340 | 6747.72 | 4.58    | 1 | .03  |
|                         | cFullHetACE | HetACE | 8 | 23427.72 | 8340 | 6747.72 | -41.26  | 1 | 1.00 |
|                         | HetACE      | HomACE | 5 | 23486.49 | 8343 | 680.49  | 58.77   | 3 | .00  |
| Big 5 Agreeableness     | FullHetACE  |        | 9 | 26249.15 | 9278 | 7693.15 |         |   |      |
|                         | FullHetACE  | HetACE | 8 | 26256.32 | 9279 | 7698.32 | 7.16    | 1 | .01  |
|                         | cFullHetACE | HetACE | 8 | 26256.32 | 9279 | 7698.32 | -147.48 | 1 | 1.00 |
|                         | HetACE      | HomACE | 5 | 26268.85 | 9282 | 7704.85 | 12.53   | 3 | .01  |
| Big 5 Conscientiousness | FullHetACE  |        | 9 | 26077.32 | 9265 | 7547.32 |         |   |      |
|                         | FullHetACE  | HetACE | 8 | 26086.36 | 9266 | 7554.36 | 9.04    | 1 | .00  |
|                         | cFullHetACE | HetACE | 8 | 26086.36 | 9266 | 7554.36 | -37.18  | 1 | 1.00 |
|                         | HetACE      | HomACE | 5 | 26102.9  | 9269 | 7564.90 | 16.54   | 3 | .00  |
| Big 5 Extraversion      | FullHetACE  |        | 9 | 2610.91  | 9315 | 747.91  |         |   |      |
|                         | FullHetACE  | HetACE | 8 | 26106.08 | 9316 | 7474.08 | 5.18    | 1 | .02  |
|                         | cFullHetACE | HetACE | 8 | 26106.08 | 9316 | 7474.08 | -37.37  | 1 | 1.00 |
|                         | HetACE      | HomACE | 5 | 26114.12 | 9319 | 7476.12 | 8.04    | 3 | .05  |
|                         | FullHetACE  |        | 9 | 26206.41 | 9328 | 755.41  |         |   |      |
|                         | FullHetACE  | HetACE | 8 | 26206.41 | 9329 | 7548.41 | .00     | 1 | 1.00 |
|                         | cFullHetACE | HetACE | 8 | 26206.41 | 9329 | 7548.41 | -1.18   | 1 | 1.00 |
|                         | HetACE      | HomACE | 5 | 26209.01 | 9332 | 7545.01 | 2.60    | 3 | .46  |
| Big 5 Openness          | FullHetACE  |        | 9 | 26143.47 | 9299 | 7545.47 |         |   |      |
|                         | FullHetACE  | HetACE | 8 | 26149.17 | 9300 | 7549.17 | 5.70    | 1 | .02  |
|                         | cFullHetACE | HetACE | 8 | 26149.17 | 9300 | 7549.17 | -33.94  | 1 | 1.00 |
|                         | HetACE      | HomACE | 5 | 26155.54 | 9303 | 7549.54 | 6.37    | 3 | .10  |
| Self-control            | FullHetACE  |        | 9 | 25985.49 | 9257 | 7471.49 |         |   |      |



|                             |             |        |   |          |      |         |         |   |      |
|-----------------------------|-------------|--------|---|----------|------|---------|---------|---|------|
|                             | FullHetACE  | HetACE | 8 | 25988.84 | 9258 | 7472.84 | 3.35    | 1 | .07  |
|                             | cFullHetACE | HetACE | 8 | 25988.84 | 9258 | 7472.84 | -38.77  | 1 | 1.00 |
|                             | HetACE      | HomACE | 5 | 25998.48 | 9261 | 7476.48 | 9.64    | 3 | .02  |
| Not planning for the future | FullHetACE  |        | 9 | 26119.56 | 9249 | 7621.56 |         |   |      |
|                             | FullHetACE  | HetACE | 8 | 26119.56 | 9250 | 7619.56 | .00     | 1 | 1.00 |
|                             | cFullHetACE | HetACE | 8 | 26119.56 | 9250 | 7619.56 | -109.58 | 1 | 1.00 |
|                             | HetACE      | HomACE | 5 | 26123.01 | 9253 | 7617.01 | 3.45    | 3 | .33  |
| Ambition                    | FullHetACE  |        | 9 | 24073.56 | 8559 | 6955.57 |         |   |      |
|                             | FullHetACE  | HetACE | 8 | 24074.46 | 8560 | 6954.46 | .89     | 1 | .34  |
|                             | cFullHetACE | HetACE | 8 | 24074.46 | 8560 | 6954.46 | -32.39  | 1 | 1.00 |
|                             | HetACE      | HomACE | 5 | 24077.22 | 8563 | 6951.22 | 2.76    | 3 | .43  |
| Physical activity           | FullHetACE  |        | 9 | 26213.51 | 9352 | 7509.51 |         |   |      |
|                             | FullHetACE  | HetACE | 8 | 26215.3  | 9353 | 7509.30 | 1.79    | 1 | .18  |
|                             | cFullHetACE | HetACE | 8 | 26215.3  | 9353 | 7509.30 | .00     | 1 | 1.00 |
|                             | HetACE      | HomACE | 5 | 26218.64 | 9356 | 7506.64 | 3.34    | 3 | .34  |
| Health behaviours           | FullHetACE  |        | 9 | 25915.07 | 9385 | 7145.07 |         |   |      |
|                             | FullHetACE  | HetACE | 8 | 25918.69 | 9386 | 7146.69 | 3.63    | 1 | .06  |
|                             | cFullHetACE | HetACE | 8 | 25918.69 | 9386 | 7146.69 | -17.04  | 1 | 1.00 |
|                             | HetACE      | HomACE | 5 | 2592.43  | 9389 | 7142.44 | 1.74    | 3 | .63  |
| Risk taking behaviour       | FullHetACE  |        | 9 | 25709.8  | 9246 | 7217.80 |         |   |      |
|                             | FullHetACE  | HetACE | 8 | 25709.96 | 9247 | 7215.96 | .16     | 1 | .69  |
|                             | cFullHetACE | HetACE | 8 | 25709.96 | 9247 | 7215.96 | -59.27  | 1 | 1.00 |
|                             | HetACE      | HomACE | 5 | 25734.29 | 9250 | 7234.29 | 24.33   | 3 | .00  |
| Risky sexual behaviour      | FullHetACE  |        | 9 | 24759.59 | 9022 | 6715.59 |         |   |      |
|                             | FullHetACE  | HetACE | 8 | 2476.7   | 9023 | 6714.70 | 1.11    | 1 | .29  |
|                             | cFullHetACE | HetACE | 8 | 2476.7   | 9023 | 6714.70 | .00     | 1 | 1.00 |
|                             | HetACE      | HomACE | 5 | 24763.31 | 9026 | 6711.32 | 2.62    | 3 | .45  |
| Media use                   | FullHetACE  |        | 9 | 25683.97 | 9301 | 7081.97 |         |   |      |
|                             | FullHetACE  | HetACE | 8 | 25689.58 | 9302 | 7085.58 | 5.60    | 1 | .02  |
|                             | cFullHetACE | HetACE | 8 | 25689.58 | 9302 | 7085.58 | -42.24  | 1 | 1.00 |

|                                           |                      |            |    |          |      |         |         |        |      |
|-------------------------------------------|----------------------|------------|----|----------|------|---------|---------|--------|------|
|                                           | HetACE               | HomACE     | 5  | 25808.11 | 9305 | 7198.11 | 118.53  | 3      | .00  |
| Volunteering                              | FullHetACE           |            | 9  | 26221.24 | 9390 | 7441.24 |         |        |      |
|                                           | FullHetACE           | HetACE     | 8  | 26221.52 | 9391 | 7439.53 | .29     | 1      | .59  |
|                                           | cFullHetACE          | HetACE     | 8  | 26221.52 | 9391 | 7439.53 | .00     | 1      | 1.00 |
|                                           | HetACE               | HomACE     | 5  | 26225.67 | 9394 | 7437.67 | 4.15    | 3      | .25  |
| Internet dating                           | FullHetACE           |            | 9  | 26071.32 | 9271 | 7529.32 |         |        |      |
| (scale)                                   | FullHetACE           | HetACE     | 8  | 26071.88 | 9272 | 7527.88 | .56     | 1      | .46  |
|                                           | cFullHetACE          | HetACE     | 8  | 26071.88 | 9272 | 7527.88 | -72.20  | 1      | 1.00 |
|                                           | HetACE               | HomACE     | 5  | 26076.86 | 9275 | 7526.86 | 4.98    | 3      | .17  |
| Internet dating                           | FullHetACE           |            | 9  | 26195.6  | 9302 | 7591.60 |         |        |      |
| (y/n)                                     | FullHetACE           | HetACE     | 8  | 26197.26 | 9303 | 7591.26 | 1.65    | 1      | .20  |
|                                           | cFullHetACE          | HetACE     | 8  | 26197.26 | 9303 | 7591.26 | -95.71  | 1      | 1.00 |
|                                           | HetACE               | HomACE     | 5  | 26203.34 | 9306 | 7591.34 | 6.09    | 3      | .11  |
| Financial literacy: Knowledge of Products | FullHetACE           |            | 9  | 25642.94 | 9145 | 7352.94 |         |        |      |
|                                           | FullHetACE           | HetACE     | 8  | 25645.94 | 9146 | 7353.94 | 3.00    | 1      | .08  |
|                                           | cFullHetACE          | HetACE     | 8  | 25645.94 | 9146 | 7353.94 | -17.42  | 1      | 1.00 |
|                                           | HetACE               | HomACE     | 5  | 25677.14 | 9149 | 7379.14 | 31.20   | 3      | .00  |
| Financial attitudes and behaviour         | FullHetACE           |            | 9  | 25819.16 | 9143 | 7533.16 |         |        |      |
|                                           | FullHetACE           | HetACE     | 8  | 25819.16 | 9144 | 7531.16 | .00     | 1      | 1.00 |
|                                           | cFullHetACE          | HetACE     | 8  | 25819.16 | 9144 | 7531.16 | -138.15 | 1      | 1.00 |
|                                           | HetACE               | HomACE     | 5  | 25828.67 | 9147 | 7534.67 | 9.50    | 3      | .02  |
| Functional outcome                        | Model fit statistics |            |    |          |      |         |         |        |      |
|                                           | base                 | comparison | ep | minus2LL | df   | AIC     | diffLL  | diffdf | p    |
| Wellbeing factor (1st PC)                 | FullHetACE           |            | 9  | 25518.12 | 9123 | 7272.12 |         |        |      |
|                                           | FullHetACE           | HetACE     | 8  | 25521.7  | 9124 | 7273.70 | 3.58    | 1      | .06  |
|                                           | cFullHetACE          | HetACE     | 8  | 25521.7  | 9124 | 7273.70 | 3.77    | 1      | .05  |
|                                           | HetACE               | HomACE     | 5  | 25529.45 | 9127 | 7275.45 | 7.75    | 3      | .05  |
| P factor (1st PC)                         | FullHetACE           |            | 9  | 19972.58 | 7169 | 5634.58 |         |        |      |
|                                           | FullHetACE           | HetACE     | 8  | 19972.72 | 7170 | 5632.72 | .14     | 1      | .71  |
|                                           | cFullHetACE          | HetACE     | 8  | 19972.72 | 7170 | 5632.72 | .00     | 1      | 1.00 |

|                            |             |        |   |          |      |         |        |   |      |
|----------------------------|-------------|--------|---|----------|------|---------|--------|---|------|
|                            | HetACE      | HomACE | 5 | 20006.12 | 7173 | 566.12  | 33.40  | 3 | .00  |
| Health factor (1st PC)     | FullHetACE  |        | 9 | 21529.51 | 7715 | 6099.51 |        |   |      |
|                            | FullHetACE  | HetACE | 8 | 21534.05 | 7716 | 6102.05 | 4.54   | 1 | .03  |
|                            | cFullHetACE | HetACE | 8 | 21534.05 | 7716 | 6102.05 | .00    | 1 | 1.00 |
|                            | HetACE      | HomACE | 5 | 2159.29  | 7719 | 6152.29 | 56.24  | 3 | .00  |
| Achieved educational level | FullHetACE  |        | 9 | 26005.97 | 9325 | 7355.97 |        |   |      |
|                            | FullHetACE  | HetACE | 8 | 26005.97 | 9326 | 7353.97 | .00    | 1 | 1.00 |
|                            | cFullHetACE | HetACE | 8 | 26005.97 | 9326 | 7353.97 | -49.90 | 1 | 1.00 |
|                            | HetACE      | HomACE | 5 | 26012.72 | 9329 | 7354.72 | 6.75   | 3 | .08  |
| Planned educational level  | FullHetACE  |        | 9 | 17251.68 | 6120 | 5011.68 |        |   |      |
|                            | FullHetACE  | HetACE | 8 | 17252.73 | 6121 | 501.73  | 1.04   | 1 | .31  |
|                            | cFullHetACE | HetACE | 8 | 17252.73 | 6121 | 501.73  | -9.05  | 1 | 1.00 |
|                            | HetACE      | HomACE | 5 | 17254.65 | 6124 | 5006.65 | 1.93   | 3 | .59  |

Note. HetACE= gender heterogeneity model not assuming equal variances across sexes and genetic correlation of unity; HomACE= gender homogeneity model assuming equal variances across sexes; ep= estimated parameters; FullHetACE= full gender heterogeneity model not assuming the genetic correlation between sexes to be 1; -2LL= minus 2 log-likelihood; df= degrees of freedom; AIC= Akaike's information criterion; diffLL= log-likelihood-ratio  $\chi^2$  test comparing the models to the base; diffdf= difference in degrees of freedom; p= the probability value of the base model fitting the data significantly worse than the comparison model, indicating significant sex differences.

**Table S12.** Model fitting results for bivariate analyses of the correlation between psychological traits and functional outcomes explained by genetic (A), shared environmental (C), and non-shared environmental (E) factors (95% confidence intervals are in parentheses).

| Trait                 | Model fitting results         |                  |                  |                  |                 |                  |                  |                  |                  |                          |                  |                  |
|-----------------------|-------------------------------|------------------|------------------|------------------|-----------------|------------------|------------------|------------------|------------------|--------------------------|------------------|------------------|
|                       | Functional outcome: wellbeing |                  |                  |                  |                 |                  |                  |                  |                  |                          |                  |                  |
|                       | Whole sample                  |                  |                  | Males only       |                 |                  | Females only     |                  |                  | Same-sex MZ and DZ twins |                  |                  |
|                       | A                             | C                | E                | A                | C               | E                | A                | C                | E                | A                        | C                | E                |
| Daily hassles         | -.15 (-.23,-.07)              | -.04 (-.10,.02)  | -.12 (-.15,-.08) | -.16 (-.24,-.05) | .00 (-.08,.04)  | -.16 (-.21,-.11) | -.12 (-.22,-.03) | -.08 (-.15,.01)  | -.09 (-.13,-.06) | -.09 (-.18,.00)          | -.10 (-.17,-.02) | -.11 (-.15,-.08) |
| CHAOS                 | -.07 (-.14,.01)               | -.10 (-.16,-.04) | -.15 (-.18,-.12) | -.06 (-.18,.07)  | -.06 (-.15,.02) | -.17 (-.23,-.12) | -.07 (-.16,.03)  | -.12 (-.20,-.05) | -.13 (-.17,-.10) | -.04 (-.13,.05)          | -.13 (-.21,-.06) | -.15 (-.18,-.12) |
| Childhood experiences | -.14 (-.21,-.07)              | -.03 (-.09,.03)  | -.07 (-.10,-.05) | -.08 (-.19,.04)  | -.03 (-.12,.05) | -.13 (-.18,-.09) | -.16 (-.24,-.07) | -.05 (-.12,.03)  | -.04 (-.07,-.02) | -.13 (-.21,-.05)         | -.04 (-.12,.03)  | -.07 (-.09,-.04) |
| Poor sleep quality    | -.13 (-.22,-.05)              | -.02 (-.08,.05)  | -.09 (-.12,-.06) | -.08 (-.17,.01)  | -.01 (-.11,.05) | -.15 (-.21,-.10) | -.16 (-.27,-.05) | -.02 (-.11,.06)  | -.06 (-.10,-.02) | -.08 (-.18,.02)          | -.08 (-.17,.01)  | -.09 (-.13,-.06) |

|                                     |                     |                     |                     |                     |                     |                     |                     |                     |                     |                     |                     |                     |
|-------------------------------------|---------------------|---------------------|---------------------|---------------------|---------------------|---------------------|---------------------|---------------------|---------------------|---------------------|---------------------|---------------------|
| Marriage hopes                      | .04 (-.04<br>,.13)  | .04 (-.02<br>,.11)  | .06 (.03<br>,.09)   | .05 (-.06,<br>.18)  | .06 (-.04,<br>.13)  | .05 (-.01,<br>.10)  | .05 (-.05,<br>.15)  | .03 (-.05,<br>.11)  | .06 (.03,<br>.10)   | .06 (-.03,<br>.16)  | .02 (-.06,<br>.10)  | .06 (.03,<br>.09)   |
| Marriage worries                    | -.11 (-.18,<br>.04) | -.05 (-.11<br>,.00) | -.12 (-.15,<br>.10) | -.14 (-.20,<br>.02) | -.01 (-.09,<br>.03) | -.10 (-.15,<br>.05) | -.09 (-.19,<br>.01) | -.09 (-.16,<br>.01) | -.14 (-.18,<br>.11) | -.05 (-.14,<br>.03) | -.11 (-.18,<br>.03) | -.13 (-.16,<br>.10) |
| Quality of relationship with twin   | .09 (.03<br>,.14)   | .05 (.01<br>,.10)   | .03 (.02<br>,.05)   | .03 (-.07,<br>.12)  | .07 (.00,<br>.15)   | .05 (.02,<br>.09)   | .12 (.05,<br>.20)   | .04 (-.02,<br>.10)  | .02 (.00,<br>.05)   | .06 (.00,<br>.13)   | .10 (.04,<br>.16)   | .04 (.02,<br>.06)   |
| Quality of relationship with mother | .14 (.07<br>,.21)   | .01 (-.04<br>,.07)  | .06 (.04<br>,.09)   | .16 (.08,<br>.24)   | .00 (-.05,<br>.05)  | .04 (-.01,<br>.08)  | .11 (.02,<br>.21)   | .04 (-.04,<br>.12)  | .08 (.04,<br>.11)   | .14 (.05,<br>.23)   | .01 (-.06,<br>.09)  | .06 (.04,<br>.09)   |
| Quality of relationship with father | .14 (.07<br>,.21)   | .03 (-.03<br>,.09)  | .07 (.04<br>,.09)   | .14 (.02,<br>.26)   | .03 (-.06,<br>.12)  | .10 (.05,<br>.14)   | .13 (.04,<br>.21)   | .04 (-.03,<br>.11)  | .05 (.03,<br>.08)   | .11 (.03,<br>.19)   | .06 (-.02,<br>.13)  | .07 (.04,<br>.09)   |
| Number of relationships             | .05 (-.01<br>,.10)  | -.01 (-.05<br>,.03) | .03 (.00<br>,.05)   | .03 (-.05,<br>.09)  | .00 (-.04,<br>.05)  | .06 (.02,<br>.10)   | .07 (-.01,<br>.15)  | -.02 (-.08,<br>.04) | .01 (-.03,<br>.04)  | .04 (-.05,<br>.13)  | .00 (-.08,<br>.07)  | .02 (-.01,<br>.05)  |
| Longest relationship                | .11 (.05<br>,.17)   | -.02 (-.07<br>,.02) | .09 (.06<br>,.12)   | .05 (-.04,<br>.14)  | -.01 (-.07,<br>.05) | .12 (.06,<br>.18)   | .15 (.06,<br>.23)   | -.03 (-.09,<br>.03) | .08 (.04,<br>.12)   | .11 (.02,<br>.19)   | -.02 (-.09,<br>.06) | .07 (.04,<br>.11)   |
| Partner violence                    | -.10 (-.18,<br>.02) | -.01 (-.07<br>,.04) | -.10 (-.13,<br>.07) | -.08 (-.17,<br>.05) | .00 (-.09,<br>.06)  | -.12 (-.18,<br>.07) | -.11 (-.20,<br>.00) | -.02 (-.10,<br>.05) | -.09 (-.13,<br>.05) | -.12 (-.19,<br>.00) | .00 (-.10,<br>.06)  | -.10 (-.14,<br>.07) |
| Contact with mother                 | .12 (.00<br>,.23)   | -.02 (-.11<br>,.07) | .02 (-.02<br>,.06)  | .14 (-.05,<br>.29)  | -.03 (-.13,<br>.10) | .04 (-.04,<br>.13)  | .09 (-.05,<br>.23)  | -.01 (-.12,<br>.11) | .01 (-.04,<br>.06)  | .09 (-.05,<br>.23)  | .01 (-.11,<br>.12)  | .02 (-.03,<br>.06)  |
| Communication with mother           | .14 (.03<br>,.25)   | -.01 (-.10<br>,.08) | -.01 (-.05<br>,.02) | .16 (-.03,<br>.33)  | -.03 (-.14,<br>.12) | -.02 (-.10,<br>.06) | .13 (-.01,<br>.27)  | .00 (-.12,<br>.11)  | -.01 (-.06,<br>.03) | .14 (.00,<br>.27)   | .00 (-.12,<br>.12)  | -.01 (-.05,<br>.03) |
| Contact with father                 | .07 (.00<br>,.18)   | .03 (-.06<br>,.11)  | .00 (-.04<br>,.04)  | -.02 (-.17,<br>.18) | .08 (-.06,<br>.19)  | .04 (-.04,<br>.11)  | .12 (-.01,<br>.25)  | -.01 (-.11,<br>.10) | -.02 (-.07,<br>.03) | .08 (-.05,<br>.20)  | .03 (-.08,<br>.14)  | .00 (-.04,<br>.05)  |
| Communication with father           | .06 (-.03<br>,.14)  | .05 (-.02<br>,.13)  | .02 (-.01<br>,.05)  | .03 (-.13,<br>.20)  | .05 (-.08,<br>.17)  | .05 (-.01,<br>.12)  | .05 (-.03,<br>.15)  | .07 (-.01,<br>.16)  | .00 (-.03,<br>.04)  | .03 (-.08,<br>.13)  | .09 (.00,<br>.18)   | .02 (-.01,<br>.05)  |
| Peer pressure                       | -.14 (-.19,<br>.07) | .03 (-.02<br>,.07)  | -.10 (-.13,<br>.07) | -.12 (-.21,<br>.03) | .02 (-.04,<br>.08)  | -.10 (-.15,<br>.05) | -.14 (-.21,<br>.04) | .02 (-.05,<br>.08)  | -.10 (-.14,<br>.06) | -.13 (-.21,<br>.04) | .02 (-.06,<br>.08)  | -.10 (-.13,<br>.07) |
| Physical peer victimisation         | .02 (-.05<br>,.09)  | -.02 (-.07<br>,.02) | -.09 (-.13,<br>.06) | .04 (-.04,<br>.16)  | -.02 (-.10,<br>.03) | -.11 (-.17,<br>.05) | -.01 (-.11,<br>.09) | -.02 (-.09,<br>.05) | -.08 (-.13,<br>.03) | .05 (-.05,<br>.14)  | -.05 (-.12,<br>.03) | -.10 (-.14,<br>.06) |
| Social peer victimisation           | -.05 (-.13<br>,.03) | -.03 (-.09<br>,.03) | -.11 (-.15,<br>.08) | .00 (-.15,<br>.12)  | -.05 (-.13,<br>.06) | -.15 (-.21,<br>.08) | -.06 (-.15,<br>.03) | -.03 (-.10,<br>.03) | -.10 (-.14,<br>.06) | .05 (-.05,<br>.13)  | -.12 (-.18,<br>.04) | -.11 (-.14,<br>.07) |
| Verbal peer victimisation           | -.10 (-.16,<br>.02) | .02 (-.04<br>,.06)  | -.11 (-.14,<br>.08) | -.04 (-.15,<br>.11) | .01 (-.09,<br>.08)  | -.14 (-.20,<br>.08) | -.12 (-.20,<br>.03) | .01 (-.06,<br>.07)  | -.10 (-.14,<br>.06) | -.08 (-.18,<br>.02) | .00 (-.09,<br>.07)  | -.11 (-.14,<br>.07) |
| Cyber peer victimisation            | -.09 (-.15,<br>.02) | .00 (-.05<br>,.04)  | -.09 (-.12,<br>.06) | -.01 (-.16,<br>.13) | -.03 (-.13,<br>.07) | -.13 (-.19,<br>.06) | -.10 (-.17,<br>.02) | .00 (-.06,<br>.05)  | -.07 (-.11,<br>.03) | -.05 (-.13,<br>.03) | -.03 (-.09,<br>.04) | -.08 (-.12,<br>.05) |
| Physical peer perpetration          | .03 (-.04<br>,.10)  | -.02 (-.07<br>,.03) | -.06 (-.10,<br>.03) | .05 (-.01,<br>.15)  | -.02 (-.09,<br>.03) | -.09 (-.15,<br>.03) | -.01 (-.11,<br>.09) | -.01 (-.07,<br>.05) | -.03 (-.09,<br>.03) | .05 (-.07,<br>.15)  | -.03 (-.12,<br>.07) | -.07 (-.11,<br>.03) |
| Social peer perpetration            | -.06 (-.14<br>,.01) | -.01 (-.06<br>,.04) | -.09 (-.13,<br>.06) | -.05 (-.15,<br>.04) | .00 (-.05,<br>.06)  | -.14 (-.20,<br>.08) | -.03 (-.13,<br>.08) | -.05 (-.13,<br>.03) | -.08 (-.13,<br>.04) | -.02 (-.13,<br>.08) | -.05 (-.14,<br>.03) | -.09 (-.13,<br>.06) |
| Verbal peer perpetration            | -.04 (-.10<br>,.03) | -.01 (-.05<br>,.04) | -.07 (-.10,<br>.04) | .00 (-.09,<br>.09)  | .00 (-.05,<br>.07)  | -.12 (-.17,<br>.07) | -.05 (-.14,<br>.04) | -.03 (-.09,<br>.03) | -.04 (-.08,<br>.00) | -.01 (-.10,<br>.09) | -.04 (-.11,<br>.04) | -.07 (-.10,<br>.03) |
| Cyber peer perpetration             | -.04 (-.11<br>,.02) | .00 (-.05<br>,.04)  | -.07 (-.11,<br>.03) | -.02 (-.09,<br>.09) | .00 (-.06,<br>.04)  | -.11 (-.16,<br>.05) | -.07 (-.16,<br>.03) | .00 (-.07,<br>.06)  | -.05 (-.09,<br>.00) | .00 (-.10,<br>.09)  | -.05 (-.12,<br>.03) | -.07 (-.10,<br>.03) |
| Parental role aspirations           | .13 (.05<br>,.19)   | -.01 (-.05<br>,.05) | .04 (.01<br>,.08)   | .10 (.01,<br>.18)   | .00 (-.05,<br>.05)  | .07 (.02,<br>.13)   | .13 (.02,<br>.23)   | .00 (-.08,<br>.08)  | .03 (-.01,<br>.07)  | .12 (.03,<br>.20)   | .00 (-.06,<br>.07)  | .04 (.01,<br>.08)   |

|                                      |                      |                     |                      |                      |                     |                      |                      |                     |                      |                      |                     |                      |
|--------------------------------------|----------------------|---------------------|----------------------|----------------------|---------------------|----------------------|----------------------|---------------------|----------------------|----------------------|---------------------|----------------------|
| Occupational role aspirations        | .02 (-.05<br>,.09)   | -.01 (-.06<br>,.04) | .00 (-.03<br>,.03)   | .04 (-.06,<br>.15)   | -.02 (-.10,<br>.04) | .01 (-.05,<br>.07)   | -.01 (-.10,<br>.09)  | .01 (-.06,<br>.08)  | .00 (-.04,<br>.04)   | .05 (-.05,<br>.14)   | -.03 (-.10,<br>.05) | .01 (-.03,<br>.04)   |
| Homecare role aspirations            | .11 (.04<br>,.17)    | .01 (-.03<br>,.06)  | .07 (.04<br>,.10)    | .13 (.05,<br>.22)    | .00 (-.06,<br>.05)  | .07 (.03,<br>.12)    | .07 (-.02,<br>.16)   | .04 (-.03,<br>.11)  | .07 (.03,<br>.10)    | .06 (-.03,<br>.16)   | .06 (-.02,<br>.14)  | .07 (.04,<br>.10)    |
| Importance of relationships          | .09 (.04<br>,.14)    | .02 (-.01<br>,.06)  | .06 (.03<br>,.09)    | .06 (-.04,<br>.13)   | .02 (-.01,<br>.10)  | .07 (.02,<br>.12)    | .13 (.05,<br>.19)    | .00 (-.04,<br>.06)  | .06 (.02,<br>.09)    | .08 (.01,<br>.15)    | .02 (-.03,<br>.08)  | .07 (.04,<br>.10)    |
| Achievement motivation               | .09 (.02<br>,.16)    | -.01 (-.05<br>,.04) | .02 (-.01<br>,.05)   | .09 (-.03,<br>.19)   | .00 (-.07,<br>.08)  | .03 (-.02,<br>.08)   | .09 (.01,<br>.17)    | -.01 (-.07,<br>.05) | .02 (-.02,<br>.05)   | .08 (-.02,<br>.17)   | .00 (-.07,<br>.08)  | .02 (-.01,<br>.05)   |
| Purpose in life                      | .24 (.16<br>,.31)    | .02 (-.03<br>,.08)  | .19 (.16<br>,.22)    | .19 (.06,<br>.29)    | .02 (-.03,<br>.12)  | .22 (.17,<br>.28)    | .25 (.15,<br>.33)    | .02 (-.04,<br>.10)  | .17 (.14,<br>.21)    | .22 (.13,<br>.32)    | .03 (-.05,<br>.11)  | .19 (.16,<br>.22)    |
| Importance of democracy and equality | -.01 (-.07<br>,.05)  | .00 (-.04<br>,.04)  | .00 (-.03<br>,.03)   | -.02 (-.12,<br>.08)  | .02 (-.05,<br>.09)  | .00 (-.05,<br>.05)   | -.01 (-.08,<br>.07)  | -.02 (-.07,<br>.04) | .00 (-.03,<br>.04)   | .02 (-.05,<br>.10)   | -.03 (-.09,<br>.03) | .00 (-.03,<br>.03)   |
| Environmental concerns               | .00 (-.08<br>,.06)   | -.02 (-.07<br>,.04) | .01 (-.01<br>,.04)   | -.03 (-.12,<br>.06)  | .02 (-.04,<br>.08)  | .02 (-.03,<br>.06)   | .04 (-.05,<br>.12)   | -.07 (-.12,<br>.01) | .01 (-.02,<br>.04)   | .02 (-.07,<br>.10)   | -.05 (-.12,<br>.02) | .01 (-.02,<br>.04)   |
| Religiosity                          | .00 (-.06<br>,.06)   | .01 (-.04<br>,.06)  | .01 (-.02<br>,.03)   | .09 (-.01,<br>.19)   | -.05 (-.13,<br>.03) | -.01 (-.05,<br>.02)  | -.05 (-.13,<br>.02)  | .04 (-.02,<br>.11)  | .02 (-.01,<br>.04)   | -.01 (-.08,<br>.06)  | .02 (-.05,<br>.08)  | .01 (-.02,<br>.03)   |
| Importance of leisure                | .16 (.09<br>,.23)    | .05 (-.01<br>,.10)  | .11 (.08<br>,.14)    | .11 (-.02,<br>.22)   | .05 (-.02,<br>.14)  | .14 (.09,<br>.20)    | .19 (.10,<br>.28)    | .04 (-.03,<br>.11)  | .09 (.05,<br>.13)    | .13 (.04,<br>.22)    | .08 (.00,<br>.16)   | .11 (.08,<br>.15)    |
| Alcohol use                          | -.08 (-.14,-<br>.01) | .05 (.00<br>,.09)   | -.08 (-.11,-<br>.05) | -.09 (-.19,<br>.03)  | .09 (.01,<br>.16)   | -.13 (-.18,-<br>.07) | -.04 (-.13,<br>.06)  | -.01 (-.08,<br>.07) | -.06 (-.10,-<br>.03) | -.09 (-.18,<br>.01)  | .06 (-.02,<br>.14)  | -.08 (-.11,-<br>.05) |
| Ever smoked                          | -.07 (-.13<br>,.00)  | .03 (-.02<br>,.07)  | -.04 (-.07,-<br>.01) | -.03 (-.11,<br>.06)  | .00 (-.05,<br>.06)  | -.06 (-.10,-<br>.01) | -.10 (-.18,-<br>.01) | .05 (-.03,<br>.11)  | -.03 (-.07,<br>.00)  | -.07 (-.15,<br>.02)  | .02 (-.05,<br>.09)  | -.04 (-.07,-<br>.01) |
| Ever vaped                           | -.06 (-.14<br>,.03)  | .00 (-.06<br>,.07)  | -.04 (-.07,-<br>.01) | -.01 (-.11,<br>.11)  | -.02 (-.10,<br>.05) | -.06 (-.11,<br>.00)  | -.10 (-.20,<br>.01)  | .02 (-.06,<br>.11)  | -.03 (-.07,<br>.01)  | -.09 (-.19,<br>.01)  | .04 (-.04,<br>.13)  | -.04 (-.07,<br>.00)  |
| Cognitive enhancers                  | -.09 (-.17<br>,.00)  | .00 (-.07<br>,.05)  | -.06 (-.09,-<br>.03) | .01 (-.09,<br>.14)   | -.02 (-.11,<br>.04) | -.11 (-.17,-<br>.05) | -.17 (-.27,-<br>.06) | .02 (-.06,<br>.10)  | -.03 (-.07,<br>.01)  | -.09 (-.19,<br>.01)  | -.01 (-.09,<br>.08) | -.06 (-.09,-<br>.03) |
| Big 5 Agreeableness                  | .05 (-.01<br>,.10)   | .00 (-.03<br>,.04)  | .05 (.02<br>,.08)    | .01 (-.08,<br>.09)   | .00 (-.05,<br>.06)  | .07 (.02,<br>.12)    | .06 (-.01,<br>.13)   | .01 (-.04,<br>.05)  | .04 (.00,<br>.08)    | .06 (-.01,<br>.13)   | -.01 (-.06,<br>.04) | .05 (.02,<br>.09)    |
| Big 5 Conscientiousness              | .16 (.09<br>,.20)    | .00 (-.03<br>,.04)  | .11 (.08<br>,.14)    | .13 (.05,<br>.20)    | .00 (-.04,<br>.05)  | .14 (.09,<br>.19)    | .16 (.08,<br>.23)    | .02 (-.03,<br>.07)  | .10 (.06,<br>.14)    | .16 (.09,<br>.23)    | .00 (-.05,<br>.06)  | .12 (.08,<br>.15)    |
| Big 5 Extraversion                   | .17 (.11<br>,.22)    | .02 (-.01<br>,.06)  | .09 (.06<br>,.12)    | .12 (.01,<br>.20)    | .02 (-.02,<br>.10)  | .12 (.07,<br>.17)    | .20 (.13,<br>.27)    | .01 (-.03,<br>.07)  | .07 (.04,<br>.11)    | .14 (.07,<br>.21)    | .05 (-.01,<br>.11)  | .09 (.06,<br>.12)    |
| Big 5 Neuroticism                    | -.17 (-.24,-<br>.09) | -.05 (-.11<br>,.01) | -.16 (-.19,-<br>.13) | -.11 (-.23,-<br>.11) | -.04 (-.14,<br>.03) | -.21 (-.27,-<br>.16) | -.18 (-.27,-<br>.09) | -.06 (-.13,<br>.00) | -.13 (-.17,-<br>.10) | -.14 (-.24,-<br>.05) | -.07 (-.15,<br>.01) | -.16 (-.19,-<br>.13) |
| Big 5 Openness                       | -.11 (-.16,-<br>.06) | .00 (-.04<br>,.03)  | -.03 (-.06<br>,.00)  | -.09 (-.18,-<br>.02) | .00 (-.05,<br>.05)  | -.06 (-.11,-<br>.01) | -.11 (-.18,-<br>.03) | -.01 (-.06,<br>.04) | -.01 (-.04,<br>.03)  | -.11 (-.18,-<br>.04) | .01 (-.05,<br>.06)  | -.02 (-.05,<br>.00)  |
| Self-control                         | .14 (.08<br>,.20)    | .02 (-.02<br>,.06)  | .14 (.11<br>,.17)    | .13 (.02,<br>.19)    | .00 (-.03,<br>.08)  | .16 (.12,<br>.22)    | .15 (.07,<br>.23)    | .03 (-.02,<br>.09)  | .12 (.09,<br>.16)    | .12 (.04,<br>.20)    | .05 (-.01,<br>.11)  | .14 (.11,<br>.17)    |
| Not planning for the future          | -.08 (-.15<br>,.00)  | -.01 (-.07<br>,.04) | -.09 (-.12,-<br>.05) | -.09 (-.17,<br>.00)  | .00 (-.06,<br>.05)  | -.09 (-.14,-<br>.04) | -.05 (-.16,-<br>.01) | -.04 (-.12,<br>.05) | -.08 (-.13,-<br>.04) | -.09 (-.18,<br>.00)  | .00 (-.07,<br>.07)  | -.08 (-.12,-<br>.05) |
| Ambition                             | .15 (.08<br>,.21)    | -.03 (-.08<br>,.01) | .02 (-.01<br>,.05)   | .16 (.06,<br>.25)    | -.04 (-.10,<br>.02) | .04 (-.02,<br>.09)   | .13 (.03,<br>.21)    | -.02 (-.08,<br>.06) | .01 (-.02,<br>.05)   | .17 (.08,<br>.24)    | -.04 (-.10,<br>.03) | .02 (-.01,<br>.05)   |
| Physical activity                    | .10 (.03<br>,.16)    | .00 (-.05<br>,.04)  | .03 (.00<br>,.06)    | .10 (.01,<br>.19)    | .00 (-.06,<br>.05)  | .06 (.01,<br>.11)    | .08 (.00,<br>.17)    | .00 (-.06,<br>.07)  | .02 (-.02,<br>.05)   | .09 (.00,<br>.18)    | .00 (-.07,<br>.08)  | .03 (.00,<br>.06)    |

|                                           |                                           |                  |                  |                  |                  |                  |                  |                  |                  |                          |                  |                  |
|-------------------------------------------|-------------------------------------------|------------------|------------------|------------------|------------------|------------------|------------------|------------------|------------------|--------------------------|------------------|------------------|
| Health behaviours                         | .04 (-.02, .12)                           | .03 (-.02, .09)  | .04 (.01, .06)   | .10 (.02, .19)   | .00 (-.06, .06)  | .00 (-.04, .05)  | .01 (-.08, .10)  | .06 (.01, .13)   | .06 (.03, .09)   | .02 (-.07, .09)          | .05 (-.01, .13)  | .04 (.01, .06)   |
| Risk taking behaviour                     | -.07 (-.13, -.01)                         | .03 (-.02, .07)  | -.08 (-.11, .06) | -.10 (-.19, .01) | .07 (.00, .13)   | -.08 (-.13, .04) | -.04 (-.12, .04) | -.01 (-.07, .05) | -.09 (-.12, .05) | -.06 (-.14, .02)         | .02 (-.05, .08)  | -.08 (-.11, .05) |
| Risky sexual behaviour                    | .05 (-.02, .11)                           | -.01 (-.06, .04) | .02 (.00, .05)   | .02 (-.06, .11)  | -.01 (-.07, .05) | .06 (.02, .10)   | .04 (-.05, .13)  | .01 (-.06, .08)  | .01 (-.02, .04)  | -.01 (-.10, .08)         | .05 (-.02, .12)  | .02 (.00, .05)   |
| Media use                                 | .04 (-.01, .09)                           | .01 (-.02, .04)  | -.05 (-.07, .02) | .07 (-.02, .13)  | .01 (-.02, .07)  | -.06 (-.11, .02) | .04 (-.03, .12)  | -.01 (-.07, .04) | -.05 (-.08, .01) | .04 (-.02, .11)          | .01 (-.04, .06)  | -.04 (-.07, .01) |
| Volunteering                              | .02 (-.04, .09)                           | .02 (-.03, .06)  | .02 (-.01, .04)  | .04 (-.05, .13)  | .00 (-.06, .06)  | .01 (-.03, .06)  | .00 (-.08, .09)  | .03 (-.04, .10)  | .02 (-.01, .05)  | .03 (-.06, .12)          | .00 (-.08, .07)  | .02 (-.01, .04)  |
| Internet dating                           | -.09 (-.15, -.02)                         | .05 (.00, .08)   | -.13 (-.16, .10) | -.06 (-.15, .04) | .05 (-.02, .10)  | -.14 (-.20, .10) | -.09 (-.17, .00) | .03 (-.04, .09)  | -.12 (-.16, .09) | -.05 (-.14, .05)         | .01 (-.07, .08)  | -.12 (-.15, .09) |
| Internet dating                           | -.07 (-.13, .01)                          | .04 (-.01, .08)  | -.11 (-.14, .08) | -.03 (-.12, .08) | .03 (-.04, .09)  | -.13 (-.18, .08) | -.09 (-.16, .00) | .03 (-.04, .09)  | -.10 (-.14, .07) | -.03 (-.12, .07)         | .00 (-.08, .08)  | -.10 (-.13, .07) |
| Financial literacy: knowledge of products | .11 (.04, .17)                            | .01 (-.03, .06)  | .10 (.07, .13)   | .13 (.03, .21)   | .00 (-.05, .08)  | .08 (.04, .13)   | .10 (.01, .18)   | .02 (-.04, .08)  | .12 (.08, .15)   | .09 (-.01, .18)          | .04 (-.04, .12)  | .10 (.07, .13)   |
| Financial attitudes and behaviour         | .15 (.08, .20)                            | .00 (-.04, .04)  | .18 (.15, .21)   | .15 (.05, .22)   | .00 (-.05, .06)  | .20 (.14, .25)   | .14 (.05, .21)   | .01 (-.05, .07)  | .18 (.14, .22)   | .14 (.05, .21)           | .01 (-.05, .08)  | .17 (.14, .21)   |
|                                           | Model fitting results                     |                  |                  |                  |                  |                  |                  |                  |                  |                          |                  |                  |
|                                           | Functional outcome: adverse mental health |                  |                  |                  |                  |                  |                  |                  |                  |                          |                  |                  |
|                                           | Whole sample                              |                  |                  | Males only       |                  |                  | Females only     |                  |                  | Same-sex MZ and DZ twins |                  |                  |
| Trait                                     | A                                         | C                | E                | A                | C                | E                | A                | C                | E                | A                        | C                | E                |
| Daily hassles                             | .27 (.20, .31)                            | .00 (-.01, .06)  | .26 (.23, .29)   | .20 (.04, .30)   | .02 (-.04, .13)  | .31 (.25, .38)   | .29 (.19, .34)   | .01 (-.02, .09)  | .24 (.20, .28)   | .28 (.18, .32)           | .00 (-.03, .08)  | .25 (.22, .29)   |
| CHAOS                                     | .10 (.02, .18)                            | .10 (.04, .16)   | .13 (.10, .16)   | .20 (.05, .34)   | -.01 (-.10, .10) | .12 (.06, .18)   | .06 (-.03, .15)  | .15 (.08, .22)   | .12 (.09, .16)   | .08 (.02, .18)           | .14 (.06, .21)   | .13 (.10, .16)   |
| Childhood experiences                     | .22 (.15, .29)                            | .02 (-.03, .08)  | .13 (.11, .16)   | .10 (-.05, .24)  | .04 (-.06, .15)  | .21 (.16, .27)   | .24 (.16, .32)   | .04 (-.02, .12)  | .10 (.07, .13)   | .24 (.15, .33)           | .02 (-.06, .10)  | .13 (.10, .15)   |
| Poor sleep quality                        | .27 (.19, .32)                            | .02 (-.02, .08)  | .23 (.19, .26)   | .16 (.02, .30)   | .05 (-.04, .17)  | .27 (.21, .34)   | .31 (.21, .36)   | .02 (-.02, .09)  | .21 (.17, .25)   | .23 (.12, .32)           | .08 (-.01, .17)  | .23 (.19, .26)   |
| Marriage hopes                            | -.11 (-.18, -.03)                         | .00 (-.05, .06)  | .01 (-.02, .05)  | -.10 (-.23, .06) | -.01 (-.12, .08) | .02 (-.05, .08)  | -.10 (-.18, .02) | .00 (-.06, .06)  | .01 (-.03, .04)  | -.08 (-.18, .02)         | -.02 (-.10, .06) | .02 (-.01, .05)  |
| Marriage worries                          | .12 (.05, .19)                            | .03 (-.01, .09)  | .07 (.04, .10)   | .10 (-.03, .20)  | .03 (-.03, .12)  | .07 (.01, .13)   | .12 (.03, .20)   | .05 (-.01, .12)  | .08 (.05, .12)   | .08 (-.01, .16)          | .07 (.00, .14)   | .08 (.05, .11)   |
| Quality of relationship with twin         | -.11 (-.17, -.05)                         | -.06 (-.11, .01) | -.02 (-.04, .00) | -.17 (-.28, .06) | .03 (-.06, .12)  | .02 (-.02, .07)  | -.09 (-.17, .02) | -.10 (-.17, .04) | -.04 (-.07, .01) | -.11 (-.19, .04)         | -.09 (-.16, .03) | -.02 (-.05, .00) |
| Quality of relationship with mother       | -.16 (-.21, -.10)                         | .00 (-.04, .04)  | -.07 (-.10, .04) | -.17 (-.28, .07) | .03 (-.04, .10)  | -.04 (-.09, .02) | -.16 (-.23, .07) | -.01 (-.08, .04) | -.08 (-.11, .05) | -.17 (-.25, .07)         | .00 (-.08, .06)  | -.07 (-.10, .04) |
| Quality of relationship with father       | -.18 (-.25, -.11)                         | -.01 (-.07, .05) | -.06 (-.08, .03) | -.10 (-.24, .04) | -.06 (-.16, .05) | -.09 (-.14, .04) | -.21 (-.29, .13) | .00 (-.06, .07)  | -.04 (-.07, .01) | -.20 (-.28, .10)         | .00 (-.08, .08)  | -.05 (-.08, .03) |
| Number of relationships                   | .08 (.05, .12)                            | .00 (-.02, .03)  | -.01 (-.03, .02) | .07 (-.02, .17)  | -.01 (-.08, .05) | -.02 (-.07, .03) | .10 (.03, .14)   | .00 (-.02, .05)  | .00 (-.03, .04)  | .08 (.00, .16)           | .01 (-.06, .07)  | .00 (-.03, .03)  |

|                                      |                  |                  |                  |                  |                  |                  |                  |                  |                  |                  |                  |                  |
|--------------------------------------|------------------|------------------|------------------|------------------|------------------|------------------|------------------|------------------|------------------|------------------|------------------|------------------|
| Longest relationship                 | -.03 (-.06, .01) | .00 (-.02, .03)  | -.01 (-.04, .02) | .00 (-.12, .12)  | .00 (-.08, .07)  | -.05 (-.11, .02) | -.04 (-.09, .01) | .00 (-.03, .03)  | .01 (-.03, .04)  | -.03 (-.09, .04) | .00 (-.06, .05)  | .00 (-.03, .04)  |
| Partner violence                     | .21 (.13, .26)   | .01 (-.01, .07)  | .10 (.07, .13)   | .11 (-.04, .23)  | .04 (-.04, .14)  | .14 (.08, .21)   | .25 (.16, .29)   | .00 (-.02, .08)  | .09 (.05, .13)   | .21 (.11, .26)   | .01 (-.02, .09)  | .10 (.07, .13)   |
| Contact with mother                  | .05 (-.05, .15)  | -.02 (-.09, .06) | -.03 (-.08, .01) | -.03 (-.20, .20) | .10 (-.07, .21)  | -.07 (-.17, .02) | .07 (-.04, .18)  | -.04 (-.12, .04) | -.01 (-.06, .04) | .10 (-.04, .21)  | -.07 (-.16, .04) | -.03 (-.08, .01) |
| Communication with mother            | -.05 (-.16, .05) | -.02 (-.10, .06) | -.03 (-.07, .01) | -.13 (-.31, .13) | .09 (-.09, .21)  | -.05 (-.15, .04) | -.03 (-.16, .08) | -.06 (-.15, .04) | -.01 (-.06, .03) | -.01 (-.15, .11) | -.06 (-.16, .06) | -.03 (-.07, .02) |
| Contact with father                  | .01 (-.10, .12)  | -.02 (-.11, .06) | -.03 (-.07, .02) | -.15 (-.27, .06) | .12 (-.04, .21)  | -.01 (-.10, .07) | .05 (.01, .17)   | -.07 (-.16, .03) | -.03 (-.08, .02) | .04 (-.10, .16)  | -.07 (-.17, .05) | -.03 (-.08, .01) |
| Communication with father            | -.01 (-.01, .06) | -.10 (-.17, .03) | -.03 (-.06, .00) | -.10 (-.29, .01) | -.01 (-.15, .14) | -.02 (-.10, .05) | .02 (-.08, .12)  | -.14 (-.22, .05) | -.03 (-.07, .01) | -.04 (-.14, .07) | -.08 (-.18, .01) | -.03 (-.07, .00) |
| Peer pressure                        | .14 (.10, .19)   | .00 (-.03, .03)  | .12 (.10, .15)   | .16 (.03, .26)   | -.02 (-.09, .07) | .11 (.05, .17)   | .15 (.11, .20)   | .00 (-.03, .04)  | .13 (.09, .17)   | .16 (.07, .21)   | .00 (-.03, .08)  | .12 (.09, .15)   |
| Physical peer victimisation          | .10 (.05, .13)   | .00 (-.02, .03)  | .07 (.04, .11)   | .01 (-.12, .11)  | .03 (-.04, .12)  | .13 (.07, .19)   | .16 (.11, .22)   | .00 (-.03, .03)  | .03 (-.02, .07)  | .10 (.03, .16)   | .00 (-.05, .06)  | .08 (.04, .12)   |
| Social peer victimisation            | .22 (.14, .26)   | .00 (-.02, .06)  | .18 (.15, .22)   | .00 (-.09, .17)  | .12 (.01, .19)   | .25 (.18, .31)   | .25 (.20, .29)   | .00 (-.03, .04)  | .17 (.13, .21)   | .20 (.10, .29)   | .02 (-.05, .10)  | .18 (.15, .22)   |
| Verbal peer victimisation            | .21 (.16, .25)   | .00 (-.02, .04)  | .17 (.14, .20)   | .01 (-.11, .15)  | .11 (.01, .21)   | .22 (.16, .29)   | .26 (.21, .32)   | .00 (-.04, .03)  | .16 (.12, .20)   | .22 (.11, .28)   | .00 (-.05, .09)  | .17 (.14, .20)   |
| Cyber peer victimisation             | .22 (.18, .25)   | .00 (-.02, .04)  | .14 (.11, .17)   | -.01 (-.11, .14) | .14 (.04, .22)   | .19 (.12, .25)   | .24 (.20, .28)   | .00 (-.02, .02)  | .14 (.10, .18)   | .21 (.14, .26)   | .00 (-.04, .06)  | .14 (.11, .17)   |
| Physical peer perpetration           | .07 (.02, .10)   | .00 (-.02, .03)  | .05 (.02, .09)   | .02 (-.11, .14)  | .02 (-.07, .11)  | .08 (.02, .14)   | .11 (.06, .17)   | .00 (-.03, .03)  | .02 (-.04, .07)  | .11 (.02, .18)   | -.05 (-.10, .03) | .06 (.02, .09)   |
| Social peer perpetration             | .16 (.10, .20)   | .00 (-.02, .04)  | .15 (.12, .19)   | .12 (-.04, .23)  | .03 (-.03, .14)  | .17 (.10, .25)   | .16 (.09, .23)   | .00 (-.04, .05)  | .15 (.10, .19)   | .18 (.07, .24)   | -.02 (-.06, .07) | .15 (.11, .18)   |
| Verbal peer perpetration             | .10 (.07, .14)   | .00 (-.02, .03)  | .12 (.09, .15)   | .04 (-.08, .14)  | .02 (-.05, .11)  | .14 (.08, .20)   | .13 (.09, .17)   | .00 (-.03, .03)  | .12 (.08, .16)   | .10 (.03, .17)   | .00 (-.05, .06)  | .12 (.09, .15)   |
| Cyber peer perpetration              | .09 (.05, .13)   | .00 (-.01, .03)  | .13 (.09, .16)   | .04 (-.10, .15)  | .03 (-.03, .13)  | .13 (.06, .20)   | .10 (.05, .15)   | .00 (-.03, .03)  | .13 (.09, .17)   | .09 (.00, .14)   | .00 (-.03, .08)  | .12 (.09, .16)   |
| Parental role aspirations            | -.12 (-.15, .07) | .00 (-.03, .03)  | -.03 (-.06, .00) | -.11 (-.21, .01) | -.01 (-.08, .06) | -.03 (-.09, .03) | -.13 (-.20, .05) | .00 (-.06, .05)  | -.03 (-.06, .01) | -.12 (-.17, .04) | .00 (-.07, .03)  | -.02 (-.05, .01) |
| Occupational role aspirations        | -.06 (-.13, .01) | .02 (-.02, .07)  | .00 (-.03, .03)  | -.13 (-.22, .01) | .05 (-.04, .11)  | .02 (-.04, .08)  | -.04 (-.12, .02) | .01 (-.03, .07)  | -.01 (-.04, .03) | -.10 (-.18, .02) | .04 (-.02, .10)  | .00 (-.03, .04)  |
| Homecare role aspirations            | -.07 (-.10, .02) | .00 (-.03, .02)  | .01 (-.02, .03)  | -.07 (-.17, .04) | -.01 (-.09, .05) | .01 (-.04, .07)  | -.07 (-.11, .03) | .00 (-.04, .04)  | .00 (-.03, .03)  | -.04 (-.13, .04) | -.03 (-.10, .04) | .00 (-.03, .03)  |
| Importance of relationships          | -.09 (-.13, .04) | .00 (-.03, .01)  | -.03 (-.06, .01) | -.04 (-.13, .07) | -.04 (-.11, .02) | .00 (-.05, .06)  | -.10 (-.14, .06) | .00 (-.03, .01)  | -.06 (-.10, .03) | -.08 (-.13, .00) | -.02 (-.08, .01) | -.04 (-.07, .01) |
| Achievement motivation               | -.06 (-.11, .01) | .00 (-.03, .04)  | .00 (-.03, .02)  | .02 (-.12, .14)  | -.07 (-.15, .04) | -.01 (-.06, .05) | -.06 (-.14, .02) | .00 (-.02, .06)  | -.01 (-.04, .02) | -.07 (-.14, .02) | .00 (-.07, .06)  | .00 (-.03, .03)  |
| Purpose in life                      | -.33 (-.37, .26) | .01 (-.04, .03)  | -.26 (-.29, .23) | -.35 (-.40, .19) | .05 (-.07, .07)  | -.24 (-.31, .19) | -.34 (-.38, .25) | .00 (-.07, .02)  | -.26 (-.30, .23) | -.32 (-.39, .21) | -.01 (-.10, .04) | -.25 (-.28, .22) |
| Importance of democracy and equality | .03 (-.02, .06)  | .00 (-.02, .03)  | .01 (-.02, .03)  | .10 (-.04, .22)  | -.05 (-.12, .05) | .00 (-.05, .06)  | .02 (-.04, .06)  | .00 (-.02, .04)  | .00 (-.04, .03)  | .02 (-.05, .07)  | .00 (-.03, .06)  | .00 (-.02, .03)  |

|                             |                   |                  |                   |                   |                  |                   |                   |                  |                  |                   |                  |                   |
|-----------------------------|-------------------|------------------|-------------------|-------------------|------------------|-------------------|-------------------|------------------|------------------|-------------------|------------------|-------------------|
| Environmental concerns      | .00 (-.05, .05)   | .00 (-.04, .04)  | -.03 (-.06, .00)  | -.02 (-.13, .10)  | -.02 (-.09, .06) | .00 (-.05, .05)   | .00 (-.07, .07)   | .01 (-.04, .06)  | -.04 (-.08, .01) | .01 (-.07, .10)   | -.01 (-.07, .06) | -.03 (-.05, .00)  |
| Religiosity                 | .03 (-.04, .09)   | -.05 (-.10, .00) | .05 (.02, .07)    | -.11 (-.23, .01)  | .02 (-.07, .11)  | .11 (.06, .15)    | .08 (.00, .15)    | -.07 (-.13, .01) | .02 (.00, .05)   | .01 (-.07, .09)   | -.03 (-.10, .04) | .04 (.02, .07)    |
| Importance of leisure       | -.26 (-.29, -.18) | .00 (-.07, .01)  | -.15 (-.18, -.12) | -.18 (-.31, -.03) | -.04 (-.15, .04) | -.18 (-.25, -.12) | -.28 (-.31, -.19) | .00 (-.07, .02)  | -.14 (-.17, .10) | -.22 (-.30, -.12) | -.04 (-.12, .02) | -.15 (-.18, -.12) |
| Alcohol use                 | .08 (.01, .15)    | -.02 (-.06, .03) | .08 (.05, .11)    | .15 (-.02, .25)   | -.11 (-.18, .01) | .10 (.04, .16)    | .09 (.02, .13)    | .00 (-.03, .05)  | .07 (.03, .10)   | .07 (-.04, .15)   | -.01 (-.08, .08) | .07 (.04, .10)    |
| Ever smoked                 | .06 (.01, .10)    | .00 (-.02, .04)  | .05 (.03, .08)    | .00 (-.12, .10)   | .03 (-.04, .11)  | .08 (.03, .14)    | .08 (.01, .14)    | .00 (-.04, .05)  | .04 (.01, .07)   | .06 (-.01, .12)   | .00 (-.06, .05)  | .05 (.02, .08)    |
| Ever vaped                  | .14 (.08, .21)    | -.01 (-.05, .04) | .04 (.01, .07)    | .06 (-.08, .19)   | .04 (-.06, .13)  | .08 (.02, .14)    | .18 (.09, .25)    | -.02 (-.08, .04) | .02 (-.02, .05)  | .16 (.07, .24)    | -.04 (-.10, .04) | .03 (.00, .06)    |
| Cognitive enhancers         | .16 (.10, .22)    | .00 (-.04, .05)  | .06 (.04, .10)    | .08 (-.07, .20)   | .00 (-.08, .10)  | .09 (.03, .15)    | .20 (.12, .27)    | .01 (-.04, .07)  | .06 (.02, .09)   | .20 (.09, .28)    | -.02 (-.08, .07) | .07 (.04, .10)    |
| Big 5 Agreeableness         | -.06 (-.09, .02)  | .00 (-.02, .02)  | -.05 (-.08, .02)  | -.08 (-.20, .03)  | .05 (-.02, .13)  | -.03 (-.09, .03)  | -.08 (-.12, .03)  | .00 (-.03, .01)  | -.06 (-.10, .02) | -.07 (-.12, .02)  | .00 (-.03, .04)  | -.06 (-.09, .03)  |
| Big 5 Conscientiousness     | -.18 (-.21, .14)  | .00 (-.02, .01)  | -.10 (-.13, .07)  | -.13 (-.22, .03)  | .00 (-.07, .04)  | -.13 (-.19, .08)  | -.20 (-.24, .16)  | .00 (-.02, .02)  | -.09 (-.12, .05) | -.19 (-.22, .14)  | .00 (-.04, .02)  | -.10 (-.13, .07)  |
| Big 5 Extraversion          | -.25 (-.28, .20)  | .00 (-.04, .01)  | -.16 (-.19, .13)  | -.16 (-.25, .04)  | -.03 (-.11, .03) | -.16 (-.22, .11)  | -.28 (-.32, .23)  | .00 (-.04, .01)  | -.16 (-.20, .13) | -.26 (-.30, .18)  | .00 (-.07, .01)  | -.15 (-.18, .12)  |
| Big 5 Neuroticism           | .35 (.28, .39)    | .00 (-.02, .06)  | .31 (.28, .35)    | .29 (.12, .39)    | .01 (-.04, .13)  | .34 (.28, .41)    | .38 (.30, .42)    | .00 (-.01, .06)  | .30 (.26, .34)   | .35 (.25, .41)    | .01 (-.02, .10)  | .30 (.27, .34)    |
| Big 5 Openness              | .08 (.05, .12)    | .00 (-.02, .02)  | .03 (.00, .06)    | .06 (-.04, .15)   | .00 (-.05, .08)  | .10 (.05, .16)    | .08 (.04, .12)    | .00 (-.02, .03)  | .00 (-.04, .03)  | .07 (.01, .12)    | .00 (-.04, .04)  | .03 (.00, .06)    |
| Self-control                | -.27 (-.30, .22)  | .00 (-.03, .01)  | -.19 (-.22, .16)  | -.21 (-.30, .08)  | -.02 (-.11, .04) | -.23 (-.30, .18)  | -.29 (-.33, .24)  | .00 (-.04, .01)  | -.17 (-.20, .13) | -.28 (-.32, .20)  | .00 (-.07, .01)  | -.18 (-.21, .15)  |
| Not planning for the future | .11 (.04, .15)    | .00 (-.03, .05)  | .07 (.04, .10)    | .14 (.02, .25)    | .00 (-.07, .08)  | .06 (.00, .12)    | .08 (-.01, .15)   | .01 (-.04, .07)  | .07 (.04, .11)   | .10 (.02, .16)    | .00 (-.05, .07)  | .07 (.03, .10)    |
| Ambition                    | -.12 (-.18, .08)  | .00 (-.02, .05)  | -.04 (-.07, .01)  | -.14 (-.25, .02)  | .02 (-.06, .09)  | -.06 (-.12, .00)  | -.11 (-.19, .07)  | .00 (-.03, .05)  | -.03 (-.06, .00) | -.14 (-.21, .07)  | .02 (-.04, .07)  | -.04 (-.07, .00)  |
| Physical activity           | -.12 (-.16, .06)  | .00 (-.05, .02)  | -.01 (-.04, .02)  | -.12 (-.22, .01)  | -.01 (-.10, .06) | -.04 (-.10, .02)  | -.12 (-.16, .04)  | .00 (-.06, .02)  | .00 (-.03, .04)  | -.08 (-.15, .00)  | -.03 (-.10, .02) | -.07 (-.04, .02)  |
| Health behaviours           | -.16 (-.21, .09)  | -.01 (-.06, .03) | -.04 (-.06, .01)  | -.21 (-.31, .09)  | .04 (-.05, .10)  | -.01 (-.06, .04)  | -.13 (-.20, .05)  | -.03 (-.10, .02) | -.05 (-.08, .02) | -.11 (-.19, .03)  | -.05 (-.11, .02) | -.03 (-.06, .00)  |
| Risk taking behaviour       | .05 (.00, .09)    | .00 (-.03, .04)  | .06 (.03, .09)    | .03 (-.12, .15)   | -.02 (-.11, .09) | .07 (.02, .13)    | .07 (.03, .12)    | .00 (-.02, .04)  | .06 (.02, .09)   | .05 (-.03, .11)   | .01 (-.04, .07)  | .06 (.03, .09)    |
| Risky sexual behaviour      | .05 (.00, .08)    | .00 (-.03, .03)  | -.01 (-.03, .02)  | .12 (.01, .23)    | -.04 (-.12, .04) | -.04 (-.09, .00)  | .03 (-.04, .08)   | .01 (-.03, .06)  | .00 (-.03, .03)  | .06 (-.03, .14)   | -.02 (-.08, .06) | -.01 (-.04, .02)  |
| Media use                   | .01 (-.03, .04)   | .00 (-.02, .02)  | .04 (.01, .06)    | -.03 (-.11, .06)  | -.01 (-.06, .05) | .05 (.00, .10)    | .03 (-.01, .07)   | .00 (-.03, .03)  | .03 (.00, .06)   | .00 (-.05, .05)   | .00 (-.04, .03)  | .03 (.00, .06)    |
| Volunteering                | .02 (-.04, .06)   | .00 (-.02, .05)  | .01 (-.01, .04)   | -.09 (-.20, .03)  | .06 (-.02, .14)  | .06 (.00, .11)    | .04 (-.02, .08)   | .00 (-.04, .04)  | .00 (-.03, .03)  | .00 (-.08, .08)   | .01 (-.04, .08)  | .02 (-.01, .05)   |
| Internet dating             | .04 (-.01, .10)   | .00 (-.04, .04)  | .06 (.03, .08)    | .03 (-.12, .15)   | -.02 (-.10, .09) | .08 (.02, .14)    | .06 (-.01, .10)   | .00 (-.04, .05)  | .04 (.01, .08)   | .00 (-.08, .09)   | .04 (-.03, .10)  | .05 (.02, .08)    |



|                                           |                                             |                     |                      |                     |                     |                      |                      |                     |                      |                          |                     |                      |
|-------------------------------------------|---------------------------------------------|---------------------|----------------------|---------------------|---------------------|----------------------|----------------------|---------------------|----------------------|--------------------------|---------------------|----------------------|
| Internet dating                           | .04 ( .00<br>,.09)                          | .00 (-.03<br>,.03)  | .05 ( .02<br>,.08)   | .02 (-.11,<br>.14)  | .00 (-.09,<br>.09)  | .07 ( .01,<br>.13)   | .06 ( .00,<br>.11)   | .00 (-<br>.03,.04)  | .04 ( .00,<br>.08)   | -.01 (-<br>.08,.09)      | .05 (-<br>.03,.11)  | .04 ( .01,<br>.07)   |
| Financial literacy: knowledge of products | -.13 (-.16,-<br>.10)                        | .00 (-.03<br>,.02)  | -.02 (-.05<br>,.01)  | -.09 (-.21,<br>.03) | -.02 (-.11,<br>.06) | -.03 (-.09,<br>.02)  | -.14 (-.18,-<br>.09) | .00 (-<br>.03,.03)  | -.01 (-<br>.05,.03)  | -.14 (-.21,-<br>.05)     | .01 (-<br>.06,.06)  | -.02 (-<br>.05,.01)  |
| Financial attitudes and behaviour         | -.10 (-.13,-<br>.06)                        | .00 (-.02<br>,.02)  | -.08 (-.11,-<br>.05) | -.08 (-.19,<br>.04) | .00 (-.08,<br>.07)  | -.11 (-.17,-<br>.05) | -.10 (-.14,-<br>.06) | .00 (-<br>.03,.03)  | -.07 (-.11,-<br>.03) | -.09 (-.15,-<br>.03)     | .00 (-<br>.05,.04)  | -.07 (-.10,-<br>.04) |
|                                           | Model fitting results                       |                     |                      |                     |                     |                      |                      |                     |                      |                          |                     |                      |
|                                           | Functional outcome: adverse physical health |                     |                      |                     |                     |                      |                      |                     |                      |                          |                     |                      |
|                                           | Whole sample                                |                     |                      | Males only          |                     |                      | Females only         |                     |                      | Same-sex MZ and DZ twins |                     |                      |
| Trait                                     | A                                           | C                   | E                    | A                   | C                   | E                    | A                    | C                   | E                    | A                        | C                   | E                    |
| Daily hassles                             | .16 ( .08<br>,.21)                          | .00 (-.04<br>,.07)  | .12 ( .09<br>,.15)   | .16 ( .08,<br>.25)  | .00 (-.06,<br>.05)  | .12 ( .06,<br>.17)   | .11 ( .01,<br>.22)   | .04 (-<br>.04,.12)  | .12 ( .08,<br>.16)   | .14 ( .04,<br>.22)       | .03 (-<br>.04,.11)  | .12 ( .08,<br>.15)   |
| CHAOS                                     | .06 (-.02<br>,.14)                          | .07 ( .01<br>,.14)  | .09 ( .06<br>,.12)   | .12 ( .00,<br>.24)  | -.01 (-.08,<br>.08) | .06 ( .00,<br>.11)   | .02 (-<br>.08,.12)   | .12 ( .04,<br>.20)  | .10 ( .06,<br>.14)   | .02 (-<br>.08,.11)       | .13 ( .05,<br>.21)  | .09 ( .06,<br>.12)   |
| Childhood experiences                     | .13 ( .06<br>,.21)                          | .01 (-.05<br>,.08)  | .07 ( .05<br>,.10)   | .02 (-.10,<br>.12)  | .02 (-.04,<br>.11)  | .15 ( .10,<br>.20)   | .16 ( .07,<br>.25)   | .02 (-<br>.06,.11)  | .05 ( .02,<br>.08)   | .14 ( .05,<br>.23)       | .01 (-<br>.07,.09)  | .07 ( .05,<br>.10)   |
| Poor sleep quality                        | .23 ( .14<br>,.29)                          | -.01 (-.05<br>,.07) | .15 ( .12<br>,.19)   | .19 ( .06,<br>.27)  | .01 (-.03,<br>.11)  | .16 ( .11,<br>.22)   | .27 ( .15,<br>.33)   | -.03 (-<br>.06,.07) | .15 ( .11,<br>.19)   | .19 ( .08,<br>.30)       | .04 (-<br>.05,.14)  | .15 ( .12,<br>.19)   |
| Marriage hopes                            | .02 (-.06<br>,.08)                          | -.06 (-.11<br>,.00) | .00 (-.04<br>,.03)   | .00 (-.12,<br>.11)  | -.04 (-.11,<br>.05) | .02 (-.04,<br>.08)   | .02 (-<br>.07,.10)   | -.07 (-<br>.13,.00) | -.01 (-<br>.05,.02)  | .04 (-<br>.06,.13)       | -.08 (-<br>.15,.01) | -.01 (-<br>.04,.02)  |
| Marriage worries                          | .04 (-.03<br>,.11)                          | .04 (-.01<br>,.09)  | .05 ( .02<br>,.08)   | .11 ( .02,<br>.17)  | .00 (-.04,<br>.06)  | .00 (-.05,<br>.05)   | -.01 (-<br>.08,.09)  | .07 (-<br>.01,.14)  | .08 ( .05,<br>.12)   | .01 (-<br>.08,.11)       | .06 (-<br>.03,.13)  | .06 ( .03,<br>.09)   |
| Quality of relationship with twin         | -.07 (-.13<br>,.00)                         | -.04 (-.09<br>,.02) | .01 (-.01<br>,.03)   | -.05 (-.15,<br>.05) | -.02 (-.11,<br>.06) | .02 (-.02,<br>.06)   | -.08 (-<br>.16,.00)  | -.03 (-<br>.10,.03) | .00 (-<br>.02,.03)   | -.07 (-<br>.14,.01)      | -.07 (-<br>.13,.00) | .00 (-<br>.02,.03)   |
| Quality of relationship with mother       | -.06 (-.12<br>,.00)                         | .02 (-.03<br>,.07)  | -.03 (-.06,-<br>.01) | -.01 (-.07,<br>.04) | .00 (-.03,<br>.06)  | -.04 (-.09,<br>.01)  | -.08 (-<br>.16,.03)  | .03 (-<br>.06,.09)  | -.03 (-<br>.07,.00)  | -.06 (-<br>.15,.04)      | .01 (-<br>.07,.09)  | -.03 (-<br>.06,.00)  |
| Quality of relationship with father       | -.11 (-.19,-<br>.03)                        | .03 (-.04<br>,.09)  | -.02 (-.05<br>,.00)  | -.07 (-.19,<br>.05) | .02 (-.07,<br>.10)  | -.05 (-.10,<br>.00)  | -.12 (-.21,-<br>.02) | .02 (-<br>.07,.10)  | -.01 (-<br>.05,.02)  | -.08 (-<br>.18,.01)      | -.01 (-<br>.09,.07) | -.02 (-<br>.05,.00)  |
| Number of relationships                   | .13 ( .07<br>,.16)                          | .00 (-.02<br>,.04)  | .02 (-.01<br>,.04)   | .09 ( .04,<br>.15)  | .00 (-.04,<br>.03)  | .02 (-.03,<br>.06)   | .11 ( .02,<br>.18)   | .04 (-<br>.02,.10)  | .02 (-<br>.01,.06)   | .09 ( .00,<br>.19)       | .04 (-<br>.05,.11)  | .02 (-<br>.01,.05)   |
| Longest relationship                      | .04 (-.02<br>,.09)                          | .00 (-.02<br>,.05)  | -.04 (-.07,-<br>.01) | .04 (-.06,<br>.10)  | .00 (-.03,<br>.07)  | -.07 (-.13,-<br>.01) | .05 (-<br>.03,.12)   | .01 (-<br>.04,.06)  | -.02 (-<br>.06,.02)  | .01 (-<br>.07,.10)       | .03 (-<br>.04,.09)  | -.03 (-<br>.06,.01)  |
| Partner violence                          | .16 ( .08<br>,.22)                          | .01 (-.03<br>,.07)  | .05 ( .02<br>,.09)   | .13 ( .03,<br>.23)  | -.01 (-.08,<br>.05) | .05 ( .00,<br>.11)   | .15 ( .05,<br>.24)   | .05 (-<br>.03,.13)  | .06 ( .02,<br>.10)   | .15 ( .05,<br>.24)       | .03 (-<br>.05,.11)  | .05 ( .02,<br>.09)   |
| Contact with mother                       | .04 (-.06<br>,.15)                          | .03 (-.06<br>,.10)  | -.02 (-.07<br>,.02)  | .00 (-.16,<br>.15)  | .04 (-.06,<br>.15)  | -.02 (-.10,<br>.06)  | .08 (-<br>.07,.23)   | -.01 (-<br>.12,.11) | -.03 (-<br>.09,.02)  | .03 (-<br>.12,.18)       | .04 (-<br>.09,.16)  | -.02 (-<br>.07,.02)  |
| Communication with mother                 | -.05 (-.16<br>,.08)                         | .04 (-.06<br>,.12)  | -.02 (-.06<br>,.02)  | -.03 (-.19,<br>.15) | .04 (-.09,<br>.15)  | -.05 (-.13,<br>.02)  | -.02 (-<br>.18,.13)  | .01 (-<br>.12,.14)  | -.02 (-<br>.07,.03)  | -.05 (-<br>.19,.11)      | .04 (-<br>.09,.17)  | -.02 (-<br>.06,.02)  |
| Contact with father                       | -.01 (-.13<br>,.11)                         | .02 (-.07<br>,.11)  | -.01 (-.05<br>,.04)  | .00 (-.17,<br>.18)  | .01 (-.12,<br>.14)  | -.01 (-.09,<br>.07)  | -.01 (-<br>.16,.14)  | .02 (-<br>.10,.14)  | -.01 (-<br>.06,.04)  | -.01 (-<br>.16,.13)      | .02 (-<br>.10,.14)  | -.01 (-<br>.05,.04)  |
| Communication with father                 | -.01 (-.10<br>,.09)                         | -.04 (-.12<br>,.04) | -.04 (-.07,-<br>.01) | -.03 (-.19,<br>.14) | -.02 (-.14,<br>.11) | -.01 (-.07,<br>.06)  | .01 (-<br>.07,.12)   | -.06 (-<br>.16,.04) | -.05 (-.09,-<br>.02) | -.03 (-<br>.15,.04)      | -.02 (-<br>.12,.08) | -.04 (-.07,-<br>.01) |

|                                      |                      |                     |                      |                      |                     |                      |                      |                     |                      |                      |                     |                      |
|--------------------------------------|----------------------|---------------------|----------------------|----------------------|---------------------|----------------------|----------------------|---------------------|----------------------|----------------------|---------------------|----------------------|
| Peer pressure                        | .11 ( .05<br>,.17)   | -.01 (-.05<br>,.03) | .05 ( .02<br>,.08)   | .08 ( .01,<br>.17)   | .00 (-.06,<br>.04)  | .07 ( .02,<br>.12)   | .12 ( .03,<br>.19)   | -.01 (-<br>.07,.05) | .04 ( .00,<br>.08)   | .14 ( .04,<br>.21)   | -.02 (-<br>.08,.05) | .05 ( .02,<br>.08)   |
| Physical peer victimisation          | .08 ( .00<br>,.13)   | .01 (-.02<br>,.07)  | .04 ( .01<br>,.08)   | .01 (-.12,<br>.10)   | .02 (-.02,<br>.12)  | .07 ( .02,<br>.13)   | .14 ( .05,<br>.20)   | .00 (-<br>.04,.07)  | .01 (-<br>.04,.06)   | .07 (-<br>.02,.15)   | .01 (-<br>.05,.09)  | .06 ( .02,<br>.10)   |
| Social peer victimisation            | .16 ( .08<br>,.23)   | .01 (-.04<br>,.07)  | .06 ( .02<br>,.09)   | .10 (-.04,<br>.22)   | .01 (-.06,<br>.11)  | .08 ( .01,<br>.15)   | .18 ( .09,<br>.26)   | .01 (-<br>.04,.09)  | .05 ( .01,<br>.09)   | .13 ( .02,<br>.24)   | .04 (-<br>.05,.13)  | .05 ( .02,<br>.09)   |
| Verbal peer victimisation            | .17 ( .10<br>,.23)   | .00 (-.04<br>,.05)  | .07 ( .03<br>,.10)   | .11 ( .00,<br>.21)   | .02 (-.05,<br>.10)  | .05 (-.01,<br>.11)   | .20 ( .12,<br>.27)   | -.01 (-<br>.06,.05) | .08 ( .04,<br>.12)   | .14 ( .04,<br>.24)   | .04 (-<br>.05,.12)  | .06 ( .03,<br>.10)   |
| Cyber peer victimisation             | .19 ( .13<br>,.25)   | .00 (-.04<br>,.04)  | .06 ( .02<br>,.09)   | .04 (-.10,<br>.17)   | .06 (-.03,<br>.16)  | .10 ( .03,<br>.16)   | .23 ( .16,<br>.30)   | .00 (-<br>.05,.05)  | .05 ( .01,<br>.09)   | .19 ( .11,<br>.26)   | .00 (-<br>.05,.07)  | .06 ( .02,<br>.09)   |
| Physical peer perpetration           | .08 ( .01<br>,.12)   | .00 (-.03<br>,.04)  | .00 (-.04<br>,.03)   | .05 (-.07,<br>.12)   | .00 (-.04,<br>.09)  | .02 (-.03,<br>.08)   | .13 ( .06,<br>.18)   | -.01 (-<br>.04,.04) | -.05 (-<br>.09,.00)  | .10 (-<br>.01,.18)   | -.03 (-<br>.10,.08) | -.01 (-<br>.05,.03)  |
| Social peer perpetration             | .10 ( .04<br>,.16)   | .00 (-.04<br>,.04)  | .07 ( .03<br>,.10)   | .09 ( .00,<br>.17)   | .00 (-.05,<br>.05)  | .06 ( .00,<br>.13)   | .11 ( .01,<br>.19)   | -.01 (-<br>.06,.07) | .07 ( .03,<br>.12)   | .12 ( .01,<br>.21)   | -.02 (-<br>.08,.07) | .06 ( .02,<br>.10)   |
| Verbal peer perpetration             | .11 ( .07<br>,.17)   | .00 (-.03<br>,.03)  | .02 (-.01<br>,.05)   | .10 ( .04,<br>.15)   | .00 (-.04,<br>.05)  | .00 (-.05,<br>.05)   | .14 ( .06,<br>.21)   | -.01 (-<br>.06,.05) | .03 (-<br>.01,.08)   | .10 ( .01,<br>.19)   | .01 (-<br>.06,.09)  | .02 ( .01,<br>.05)   |
| Cyber peer perpetration              | .10 ( .05<br>,.15)   | .00 (-.03<br>,.03)  | .05 ( .01<br>,.08)   | .07 (-.03,<br>.13)   | .00 (-.03,<br>.06)  | .03 (-.03,<br>.10)   | .14 ( .06,<br>.22)   | -.02 (-<br>.07,.04) | .05 ( .01,<br>.09)   | .11 ( .02,<br>.19)   | .00 (-<br>.06,.07)  | .05 ( .01,<br>.08)   |
| Parental role aspirations            | -.02 (-.07<br>,.04)  | .00 (-.04<br>,.04)  | -.03 (-.06<br>,.00)  | .05 (-.01,<br>.14)   | .00 (-.06,<br>.03)  | -.09 (-.15,<br>.04)  | -.07 (-<br>.15,.04)  | .02 (-<br>.06,.09)  | .00 (-<br>.04,.04)   | -.01 (-<br>.08,.07)  | -.01 (-<br>.07,.05) | -.03 (-<br>.06,.00)  |
| Occupational role aspirations        | -.05 (-.11<br>,.01)  | .01 (-.03<br>,.06)  | .00 (-.04<br>,.03)   | -.02 (-.13,<br>.05)  | .01 (-.03,<br>.09)  | -.03 (-.09,<br>.03)  | -.05 (-<br>.14,.04)  | .01 (-<br>.06,.07)  | .01 (-<br>.03,.05)   | -.08 (-<br>.16,.02)  | .03 (-<br>.06,.10)  | .00 (-<br>.03,.03)   |
| Homecare role aspirations            | -.02 (-.06<br>,.05)  | -.01 (-.06<br>,.02) | .01 (-.02<br>,.04)   | -.04 (-.09,<br>.02)  | .00 (-.07,<br>.03)  | -.01 (-.06,<br>.04)  | .00 (-<br>.08,.08)   | -.02 (-<br>.08,.05) | .02 (-<br>.02,.05)   | .01 (-<br>.09,.10)   | -.04 (-<br>.11,.05) | .00 (-<br>.04,.03)   |
| Importance of relationships          | .00 (-.03<br>,.05)   | .00 (-.04<br>,.02)  | -.02 (-.05<br>,.01)  | .05 ( .00,<br>.15)   | .00 (-.07,<br>.02)  | -.03 (-.08,<br>.01)  | -.03 (-<br>.09,.03)  | .00 (-<br>.04,.04)  | -.01 (-<br>.05,.03)  | .02 (-<br>.04,.09)   | -.02 (-<br>.08,.02) | -.02 (-<br>.05,.01)  |
| Achievement motivation               | -.03 (-.09<br>,.03)  | .00 (-.04<br>,.04)  | .00 (-.03<br>,.03)   | .02 (-.07,<br>.13)   | -.03 (-.10,<br>.04) | -.02 (-.07,<br>.04)  | -.05 (-<br>.13,.02)  | .01 (-<br>.04,.07)  | .01 (-<br>.02,.05)   | -.01 (-<br>.11,.07)  | -.02 (-<br>.09,.07) | .00 (-<br>.03,.04)   |
| Purpose in life                      | -.15 (-.21,-<br>.08) | .02 (-.03<br>,.06)  | -.11 (-.14,-<br>.08) | -.12 (-.22,-<br>.02) | .04 (-.04,<br>.10)  | -.12 (-.17,-<br>.06) | -.16 (-.23,-<br>.06) | .00 (-<br>.07,.06)  | -.11 (-.14,-<br>.07) | -.18 (-.26,-<br>.08) | .04 (-<br>.05,.10)  | -.11 (-.14,-<br>.07) |
| Importance of democracy and equality | .01 (-.04<br>,.06)   | .00 (-.03<br>,.03)  | -.02 (-.05<br>,.01)  | .07 (-.02,<br>.16)   | .00 (-.06,<br>.06)  | -.06 (-.11,-<br>.01) | -.02 (-<br>.08,.05)  | .00 (-<br>.04,.04)  | -.01 (-<br>.04,.03)  | .00 (-<br>.06,.08)   | .00 (-<br>.07,.04)  | -.02 (-<br>.05,.01)  |
| Environmental concerns               | -.05 (-.11<br>,.01)  | -.01 (-.05<br>,.04) | -.03 (-.05<br>,.00)  | -.05 (-.11,<br>.06)  | .00 (-.08,<br>.03)  | -.04 (-.08,<br>.01)  | -.08 (-<br>.16,.02)  | .01 (-<br>.07,.08)  | -.02 (-<br>.05,.02)  | -.04 (-<br>.14,.05)  | -.02 (-<br>.10,.06) | -.03 (-<br>.06,.00)  |
| Religiosity                          | .03 (-.03<br>,.10)   | -.02 (-.07<br>,.04) | .00 (-.02<br>,.03)   | .03 (-.08,<br>.13)   | -.01 (-.09,<br>.08) | -.01 (-.05,<br>.03)  | .04 (-<br>.04,.13)   | -.03 (-<br>.10,.04) | .01 (-<br>.02,.03)   | .05 (-<br>.03,.13)   | -.03 (-<br>.10,.04) | .00 (-<br>.02,.03)   |
| Importance of leisure                | -.11 (-.16,-<br>.03) | -.01 (-.07<br>,.02) | -.10 (-.13,-<br>.07) | -.03 (-.11,<br>.10)  | -.02 (-.11,<br>.03) | -.13 (-.19,-<br>.08) | -.14 (-.21,-<br>.05) | -.01 (-<br>.08,.04) | -.09 (-.13,-<br>.05) | -.08 (-<br>.17,.01)  | -.05 (-<br>.12,.03) | -.10 (-.14,-<br>.07) |
| Alcohol use                          | .13 ( .05<br>,.19)   | -.04 (-.08<br>,.02) | .02 (-.01<br>,.05)   | .16 ( .03,<br>.27)   | -.06 (-.14,<br>.03) | .01 (-.05,<br>.06)   | .10 ( .01,<br>.18)   | -.01 (-<br>.07,.06) | .03 (-<br>.01,.07)   | .17 ( .06,<br>.25)   | -.08 (-<br>.14,.02) | .01 (-<br>.02,.05)   |
| Ever smoked                          | .07 ( .01<br>,.12)   | .00 (-.04<br>,.04)  | .04 ( .01<br>,.07)   | .06 (-.01,<br>.12)   | .00 (-.05,<br>.04)  | .04 (-.01,<br>.09)   | .05 (-<br>.04,.14)   | .02 (-<br>.05,.09)  | .04 ( .01,<br>.08)   | .07 (-<br>.02,.14)   | .00 (-<br>.06,.07)  | .04 ( .01,<br>.07)   |
| Ever vaped                           | .12 ( .04<br>,.19)   | -.01 (-.06<br>,.06) | .03 ( .00<br>,.07)   | .09 (-.01,<br>.19)   | .00 (-.06,<br>.07)  | .05 ( .00,<br>.10)   | .13 ( .01,<br>.23)   | .00 (-<br>.08,.10)  | .03 (-<br>.01,.07)   | .10 (-<br>.01,.20)   | .01 (-<br>.08,.11)  | .03 ( .00,<br>.06)   |

|                                           |                   |                  |                  |                  |                  |                  |                  |                  |                  |                  |                  |                  |
|-------------------------------------------|-------------------|------------------|------------------|------------------|------------------|------------------|------------------|------------------|------------------|------------------|------------------|------------------|
| Cognitive enhancers                       | .15 (.08, .22)    | -.02 (-.07, .04) | .04 (.01, .07)   | .08 (-.01, .18)  | .00 (-.07, .06)  | .08 (.02, .14)   | .18 (.06, .27)   | -.02 (-.09, .07) | .02 (-.02, .06)  | .16 (.05, .26)   | -.02 (-.11, .07) | .04 (.00, .07)   |
| Big 5 Agreeableness                       | -.04 (-.07, .01)  | .00 (-.03, .02)  | -.02 (-.05, .01) | .00 (-.08, .06)  | .00 (-.04, .05)  | -.04 (-.09, .02) | -.05 (-.10, .02) | .00 (-.05, .03)  | -.01 (-.05, .03) | -.04 (-.10, .03) | .00 (-.05, .04)  | -.02 (-.06, .01) |
| Big 5 Conscientiousness                   | -.10 (-.13, -.05) | .00 (-.03, .02)  | -.06 (-.09, .03) | -.05 (-.10, .01) | .00 (-.04, .03)  | -.08 (-.13, .02) | -.12 (-.18, .05) | -.01 (-.05, .03) | -.05 (-.09, .01) | -.09 (-.15, .03) | -.01 (-.07, .03) | -.07 (-.10, .03) |
| Big 5 Extraversion                        | -.11 (-.14, -.05) | .00 (-.04, .01)  | -.05 (-.08, .02) | -.05 (-.10, .03) | .00 (-.05, .02)  | -.08 (-.13, .03) | -.13 (-.18, .05) | -.02 (-.07, .02) | -.03 (-.07, .00) | -.09 (-.15, .02) | -.03 (-.08, .02) | -.06 (-.09, .02) |
| Big 5 Neuroticism                         | .19 (.11, .24)    | -.01 (-.04, .05) | .12 (.09, .15)   | .15 (.03, .25)   | -.01 (-.07, .08) | .15 (.10, .21)   | .19 (.10, .26)   | .01 (-.04, .08)  | .11 (.07, .15)   | .20 (.10, .28)   | -.01 (-.08, .08) | .12 (.09, .15)   |
| Big 5 Openness                            | .04 (.00, .09)    | .00 (-.03, .02)  | -.01 (-.04, .02) | .04 (-.02, .09)  | .00 (-.05, .03)  | -.01 (-.06, .04) | .03 (-.02, .10)  | .00 (-.05, .04)  | -.01 (-.05, .03) | .04 (-.03, .11)  | .00 (-.05, .05)  | -.02 (-.05, .01) |
| Self-control                              | -.15 (-.19, -.10) | .00 (-.03, .03)  | -.11 (-.14, .08) | -.12 (-.20, .05) | .00 (-.04, .05)  | -.10 (-.16, .05) | -.16 (-.22, .09) | .00 (-.06, .04)  | -.11 (-.15, .07) | -.16 (-.23, .08) | .00 (-.06, .05)  | -.11 (-.14, .07) |
| Not planning for the future               | .01 (-.06, .08)   | .02 (-.03, .07)  | .06 (.03, .10)   | .03 (-.04, .12)  | .00 (-.06, .04)  | .07 (.02, .13)   | -.05 (-.14, .05) | .07 (.00, .14)   | .07 (.03, .11)   | -.01 (-.09, .08) | .04 (-.04, .10)  | .07 (.03, .10)   |
| Ambition                                  | -.06 (-.12, .01)  | .00 (-.03, .05)  | -.02 (-.05, .01) | .00 (-.11, .07)  | .00 (-.04, .07)  | -.09 (-.14, .03) | -.07 (-.15, .01) | .00 (-.06, .05)  | .00 (-.04, .04)  | -.07 (-.15, .01) | .00 (-.07, .06)  | -.02 (-.05, .01) |
| Physical activity                         | -.08 (-.12, .01)  | .00 (-.05, .02)  | -.04 (-.07, .02) | -.05 (-.10, .05) | .00 (-.07, .03)  | -.06 (-.11, .01) | -.09 (-.16, .01) | -.01 (-.07, .05) | -.04 (-.07, .00) | -.04 (-.13, .04) | -.04 (-.11, .03) | -.05 (-.08, .02) |
| Health behaviours                         | -.09 (-.16, .03)  | -.03 (-.08, .02) | -.05 (-.08, .03) | -.08 (-.14, .00) | .00 (-.06, .04)  | -.08 (-.12, .03) | -.07 (-.17, .01) | -.06 (-.12, .02) | -.04 (-.08, .01) | -.06 (-.16, .02) | -.06 (-.13, .02) | -.05 (-.08, .03) |
| Risk taking behaviour                     | .08 (.02, .14)    | -.01 (-.05, .03) | .07 (.04, .10)   | .10 (.00, .20)   | -.03 (-.09, .05) | .06 (.01, .11)   | .07 (.00, .14)   | .00 (-.05, .05)  | .07 (.03, .11)   | .10 (.01, .17)   | -.02 (-.08, .05) | .06 (.03, .09)   |
| Risky sexual behaviour                    | .08 (.02, .13)    | .00 (-.03, .05)  | .03 (.00, .05)   | .09 (.02, .19)   | -.01 (-.08, .03) | .02 (-.03, .06)  | .03 (-.04, .12)  | .04 (-.02, .11)  | .03 (.00, .06)   | .07 (-.03, .16)  | .01 (-.07, .10)  | .03 (.00, .05)   |
| Media use                                 | .02 (-.02, .05)   | .00 (-.02, .03)  | .05 (.03, .08)   | .01 (-.04, .06)  | .00 (-.03, .03)  | .04 (.00, .09)   | .02 (-.05, .08)  | .01 (-.03, .06)  | .06 (.03, .09)   | .00 (-.06, .06)  | .02 (-.03, .07)  | .05 (.02, .08)   |
| Volunteering                              | .07 (.02, .13)    | -.01 (-.05, .03) | .02 (-.01, .05)  | .06 (-.03, .13)  | .00 (-.04, .06)  | .02 (-.03, .06)  | .10 (.02, .17)   | -.02 (-.08, .04) | .02 (-.02, .05)  | .07 (-.03, .15)  | .00 (-.07, .08)  | .01 (-.02, .04)  |
| Internet dating                           | -.01 (-.08, .06)  | .03 (-.02, .08)  | .05 (.02, .08)   | -.01 (-.11, .07) | .00 (-.05, .08)  | .04 (-.01, .09)  | -.01 (-.10, .08) | .04 (-.03, .11)  | .06 (.02, .10)   | -.06 (-.14, .03) | .07 (.00, .14)   | .06 (.02, .09)   |
| Internet dating                           | .03 (-.04, .08)   | .01 (-.03, .06)  | .04 (.00, .07)   | .00 (-.09, .09)  | .00 (-.05, .06)  | .04 (-.01, .09)  | .03 (-.05, .11)  | .02 (-.03, .09)  | .04 (.00, .08)   | -.04 (-.12, .04) | .08 (.00, .14)   | .04 (.00, .07)   |
| Financial literacy: knowledge of products | -.03 (-.08, .03)  | .00 (-.05, .02)  | -.02 (-.05, .01) | -.04 (-.09, .01) | .00 (-.06, .05)  | -.04 (-.08, .01) | -.01 (-.08, .07) | -.02 (-.08, .03) | -.01 (-.05, .02) | .00 (-.09, .09)  | -.04 (-.11, .04) | -.03 (-.06, .00) |
| Financial attitudes and behaviour         | -.05 (-.09, .00)  | .00 (-.04, .02)  | -.10 (-.13, .07) | -.04 (-.11, .04) | .00 (-.05, .04)  | -.14 (-.20, .09) | -.05 (-.11, .03) | -.01 (-.07, .03) | -.08 (-.12, .05) | -.05 (-.12, .03) | .00 (-.06, .06)  | -.10 (-.14, .07) |

Model fitting results

Functional outcome: achieved educational level

| Trait | Whole sample |   |   | Males only |   |   | Females only |   |   | Same-sex MZ and DZ twins |   |   |
|-------|--------------|---|---|------------|---|---|--------------|---|---|--------------------------|---|---|
|       | A            | C | E | A          | C | E | A            | C | E | A                        | C | E |

|                                     |                  |                  |                  |                  |                  |                  |                  |                  |                  |                  |                  |                  |
|-------------------------------------|------------------|------------------|------------------|------------------|------------------|------------------|------------------|------------------|------------------|------------------|------------------|------------------|
| Daily hassles                       | .02 (-.06, .10)  | -.01 (-.07, .06) | .00 (-.03, .03)  | .00 (-.12, .13)  | .00 (-.09, .09)  | -.01 (-.06, .05) | .03 (-.07, .14)  | -.02 (-.10, .07) | .00 (-.04, .04)  | .03 (-.07, .12)  | -.01 (-.08, .07) | .00 (-.03, .04)  |
| CHAOS                               | -.02 (-.09, .06) | -.07 (-.13, .02) | .00 (-.02, .03)  | -.10 (-.23, .02) | -.03 (-.12, .07) | .05 (-.00, .10)  | .02 (-.07, .11)  | -.09 (-.16, .02) | -.02 (-.05, .02) | -.02 (-.10, .07) | -.07 (-.14, .00) | .01 (-.02, .04)  |
| Childhood experiences               | -.02 (-.09, .05) | -.03 (-.09, .03) | .01 (-.02, .03)  | -.09 (-.22, .04) | -.01 (-.11, .09) | .04 (-.01, .08)  | .00 (-.08, .09)  | -.03 (-.11, .04) | .00 (-.03, .02)  | -.01 (-.10, .08) | -.04 (-.11, .04) | .01 (-.02, .03)  |
| Poor sleep quality                  | .06 (-.01, .13)  | -.10 (-.15, .04) | -.02 (-.05, .01) | .07 (-.05, .17)  | -.11 (-.17, .01) | -.02 (-.07, .04) | .06 (-.04, .14)  | -.10 (-.16, .02) | -.02 (-.06, .02) | .11 (-.01, .18)  | -.15 (-.20, .06) | -.02 (-.05, .01) |
| Marriage hopes                      | .14 (-.06, .22)  | -.03 (-.09, .03) | -.02 (-.05, .01) | .14 (-.02, .23)  | -.04 (-.10, .05) | -.02 (-.07, .03) | .12 (-.02, .22)  | -.01 (-.09, .07) | -.02 (-.05, .02) | .14 (-.05, .24)  | -.04 (-.12, .04) | -.03 (-.06, .00) |
| Marriage worries                    | .01 (-.07, .09)  | -.01 (-.07, .05) | -.03 (-.06, .00) | -.03 (-.13, .09) | .03 (-.05, .10)  | -.02 (-.07, .03) | .04 (-.06, .14)  | -.05 (-.13, .03) | -.03 (-.07, .00) | .02 (-.08, .11)  | -.02 (-.10, .06) | -.03 (-.06, .00) |
| Quality of relationship with twin   | .00 (-.06, .06)  | .05 (-.00, .10)  | -.02 (-.04, .00) | -.01 (-.10, .08) | .07 (-.01, .14)  | -.02 (-.05, .02) | .01 (-.07, .08)  | .04 (-.02, .10)  | -.02 (-.04, .01) | .01 (-.06, .08)  | .06 (-.01, .12)  | -.01 (-.04, .01) |
| Quality of relationship with mother | .00 (-.07, .07)  | .02 (-.04, .08)  | .00 (-.03, .02)  | .02 (-.08, .13)  | .02 (-.06, .09)  | -.01 (-.06, .03) | .00 (-.09, .09)  | .01 (-.06, .09)  | .00 (-.03, .03)  | .04 (-.05, .13)  | -.02 (-.10, .05) | .00 (-.03, .02)  |
| Quality of relationship with father | .00 (-.07, .07)  | .05 (-.01, .10)  | .01 (-.02, .03)  | -.01 (-.13, .11) | .07 (-.02, .16)  | -.01 (-.05, .04) | .01 (-.07, .10)  | .03 (-.04, .10)  | .01 (-.02, .04)  | .04 (-.04, .13)  | .00 (-.07, .08)  | .01 (-.02, .03)  |
| Number of relationships             | -.08 (-.14, .01) | -.01 (-.05, .04) | -.01 (-.03, .02) | -.10 (-.19, .01) | .04 (-.03, .10)  | -.04 (-.08, .01) | -.03 (-.11, .05) | -.06 (-.12, .00) | .01 (-.02, .04)  | -.05 (-.14, .03) | -.05 (-.12, .03) | -.01 (-.04, .02) |
| Longest relationship                | .00 (-.07, .07)  | -.05 (-.09, .00) | -.03 (-.06, .00) | .03 (-.09, .14)  | -.06 (-.14, .02) | -.04 (-.10, .02) | -.02 (-.11, .07) | -.04 (-.10, .03) | -.03 (-.07, .01) | .00 (-.09, .08)  | -.05 (-.12, .02) | -.04 (-.07, .01) |
| Partner violence                    | -.06 (-.14, .02) | -.04 (-.10, .02) | -.01 (-.04, .02) | -.16 (-.27, .03) | .02 (-.08, .09)  | .03 (-.02, .09)  | -.02 (-.12, .07) | -.06 (-.13, .02) | -.02 (-.06, .02) | -.07 (-.16, .02) | -.02 (-.10, .05) | .00 (-.04, .03)  |
| Contact with mother                 | -.14 (-.26, .02) | -.04 (-.14, .06) | -.06 (-.11, .02) | -.10 (-.32, .10) | -.03 (-.19, .13) | -.07 (-.15, .02) | -.16 (-.30, .01) | -.05 (-.17, .07) | -.06 (-.12, .01) | -.07 (-.17, .07) | -.11 (-.22, .02) | -.06 (-.10, .02) |
| Communication with mother           | -.01 (-.12, .11) | .00 (-.10, .10)  | -.02 (-.06, .02) | .06 (-.15, .26)  | -.07 (-.23, .09) | .00 (-.08, .07)  | -.05 (-.19, .10) | .05 (-.08, .17)  | -.02 (-.07, .03) | -.03 (-.18, .12) | .02 (-.11, .15)  | -.02 (-.06, .03) |
| Contact with father                 | -.21 (-.29, .12) | .06 (-.02, .13)  | .00 (-.03, .04)  | -.21 (-.32, .05) | .10 (-.03, .19)  | -.02 (-.08, .05) | -.19 (-.31, .05) | .02 (-.08, .13)  | .01 (-.04, .06)  | -.13 (-.25, .01) | -.02 (-.12, .09) | .01 (-.03, .05)  |
| Communication with father           | -.02 (-.11, .07) | .06 (-.01, .14)  | .00 (-.04, .03)  | -.07 (-.24, .01) | .10 (-.03, .23)  | -.01 (-.07, .05) | .00 (-.11, .10)  | .05 (-.04, .14)  | .00 (-.04, .04)  | .06 (-.00, .16)  | -.01 (-.10, .09) | .00 (-.03, .03)  |
| Peer pressure                       | .02 (-.05, .09)  | .02 (-.03, .07)  | -.02 (-.05, .01) | -.01 (-.12, .10) | .03 (-.06, .10)  | -.01 (-.05, .04) | .04 (-.05, .13)  | .02 (-.05, .09)  | -.03 (-.07, .01) | .01 (-.07, .10)  | .04 (-.03, .10)  | -.02 (-.05, .01) |
| Physical peer victimisation         | -.04 (-.12, .03) | -.03 (-.08, .02) | .01 (-.03, .04)  | -.03 (-.15, .08) | -.03 (-.11, .06) | .02 (-.03, .07)  | -.05 (-.16, .05) | -.04 (-.11, .04) | .00 (-.05, .05)  | -.01 (-.09, .08) | -.07 (-.13, .01) | .01 (-.02, .05)  |
| Social peer victimisation           | -.08 (-.16, .01) | .03 (-.04, .09)  | .01 (-.03, .04)  | -.13 (-.23, .01) | .04 (-.06, .12)  | .07 (-.01, .12)  | -.04 (-.13, .05) | .01 (-.06, .08)  | -.03 (-.07, .02) | -.09 (-.19, .01) | .05 (-.04, .13)  | .01 (-.02, .05)  |
| Verbal peer victimisation           | -.01 (-.09, .07) | -.02 (-.08, .03) | .02 (-.02, .05)  | .02 (-.12, .15)  | -.06 (-.15, .05) | .04 (-.01, .10)  | -.02 (-.11, .07) | -.01 (-.07, .05) | -.01 (-.05, .03) | .02 (-.07, .11)  | -.05 (-.12, .03) | .02 (-.02, .05)  |
| Cyber peer victimisation            | -.07 (-.14, .00) | .00 (-.06, .05)  | .01 (-.02, .04)  | .00 (-.15, .15)  | -.06 (-.17, .05) | .03 (-.03, .09)  | -.09 (-.17, .01) | .01 (-.05, .06)  | -.01 (-.05, .03) | -.07 (-.15, .01) | .00 (-.07, .06)  | .01 (-.02, .04)  |
| Physical peer perpetration          | -.05 (-.12, .03) | -.04 (-.10, .01) | -.01 (-.05, .03) | -.04 (-.17, .08) | -.06 (-.15, .03) | .00 (-.06, .05)  | -.03 (-.14, .07) | -.04 (-.10, .03) | -.03 (-.08, .03) | .02 (-.08, .10)  | -.11 (-.17, .03) | -.01 (-.05, .03) |

|                                      |                  |                  |                  |                  |                  |                  |                  |                  |                  |                  |                   |                  |
|--------------------------------------|------------------|------------------|------------------|------------------|------------------|------------------|------------------|------------------|------------------|------------------|-------------------|------------------|
| Social peer perpetration             | -.01 (-.10, .06) | -.02 (-.08, .04) | -.02 (-.06, .02) | -.04 (-.16, .09) | -.01 (-.09, .07) | .01 (-.06, .07)  | .00 (-.11, .11)  | -.03 (-.11, .05) | -.03 (-.08, .01) | -.01 (-.12, .10) | -.02 (-.10, .07)  | -.02 (-.06, .02) |
| Verbal peer perpetration             | -.01 (-.08, .06) | -.01 (-.06, .04) | -.01 (-.04, .03) | .01 (-.11, .12)  | -.04 (-.12, .04) | .04 (-.02, .09)  | -.02 (-.11, .07) | .01 (-.06, .07)  | -.04 (-.08, .00) | .02 (-.07, .11)  | -.04 (-.11, .03)  | -.01 (-.04, .03) |
| Cyber peer perpetration              | -.03 (-.10, .05) | -.02 (-.07, .03) | -.02 (-.05, .02) | -.02 (-.14, .10) | -.05 (-.13, .03) | .02 (-.05, .08)  | -.04 (-.13, .06) | .01 (-.06, .07)  | -.04 (-.08, .01) | -.01 (-.10, .08) | -.04 (-.11, .03)  | -.02 (-.06, .01) |
| Parental role aspirations            | .03 (-.05, .10)  | -.03 (-.09, .02) | -.04 (-.07, .01) | .02 (-.09, .13)  | -.03 (-.10, .05) | -.01 (-.07, .04) | .03 (-.08, .13)  | -.04 (-.12, .04) | -.06 (-.09, .02) | .03 (-.05, .11)  | -.05 (-.11, .02)  | -.04 (-.08, .01) |
| Occupational role aspirations        | .07 (-.01, .15)  | .02 (-.04, .08)  | .05 (-.01, .08)  | .09 (-.04, .20)  | -.01 (-.09, .08) | .03 (-.02, .09)  | .05 (-.04, .15)  | .04 (-.03, .12)  | .06 (-.02, .10)  | .07 (-.03, .17)  | .02 (-.06, .10)   | .05 (-.01, .08)  |
| Homecare role aspirations            | -.07 (-.14, .00) | .02 (-.04, .07)  | .01 (-.02, .04)  | .01 (-.10, .11)  | .00 (-.08, .07)  | -.01 (-.06, .04) | -.13 (-.22, .03) | .04 (-.04, .10)  | .02 (-.02, .06)  | -.09 (-.19, .00) | .04 (-.04, .12)   | .01 (-.02, .04)  |
| Importance of relationships          | .01 (-.04, .07)  | .01 (-.03, .05)  | .01 (-.02, .04)  | .00 (-.09, .09)  | .02 (-.04, .08)  | .02 (-.03, .06)  | .02 (-.05, .09)  | .00 (-.05, .05)  | .00 (-.03, .04)  | .01 (-.06, .07)  | .01 (-.04, .06)   | .01 (-.02, .04)  |
| Achievement motivation               | .03 (-.05, .10)  | -.01 (-.06, .05) | .04 (-.01, .07)  | -.02 (-.15, .11) | .03 (-.07, .12)  | .06 (-.01, .12)  | .05 (-.04, .13)  | -.02 (-.08, .04) | .03 (-.01, .06)  | .07 (-.02, .14)  | -.06 (-.12, .02)  | .04 (-.01, .07)  |
| Purpose in life                      | .06 (-.02, .13)  | -.01 (-.07, .05) | .02 (-.01, .05)  | .02 (-.10, .15)  | .02 (-.07, .12)  | .01 (-.04, .06)  | .08 (-.01, .16)  | -.03 (-.09, .04) | .02 (-.01, .06)  | .04 (-.05, .13)  | .00 (-.08, .08)   | .02 (-.01, .05)  |
| Importance of democracy and equality | .11 (-.05, .18)  | .02 (-.02, .07)  | .02 (-.01, .05)  | .10 (-.02, .22)  | .01 (-.08, .10)  | .01 (-.04, .06)  | .12 (-.04, .20)  | .03 (-.03, .08)  | .02 (-.01, .06)  | .11 (-.04, .19)  | .02 (-.04, .08)   | .02 (-.01, .05)  |
| Environmental concerns               | .11 (-.04, .19)  | .04 (-.02, .09)  | .03 (-.00, .06)  | .08 (-.02, .19)  | .06 (-.02, .14)  | .05 (-.00, .09)  | .14 (-.05, .23)  | .02 (-.05, .09)  | .02 (-.01, .05)  | .03 (NA, NA)     | .01 (-1.00, 1.00) | .00 (NA, NA)     |
| Religiosity                          | .00 (-.06, .06)  | .07 (-.02, .12)  | .00 (-.02, .02)  | -.01 (-.11, .08) | .06 (-.02, .14)  | .00 (-.03, .04)  | .01 (-.06, .09)  | .08 (-.01, .14)  | .00 (-.03, .02)  | -.02 (-.09, .05) | .09 (-.03, .16)   | .00 (-.02, .02)  |
| Importance of leisure                | .05 (-.02, .13)  | .07 (-.01, .12)  | .00 (-.03, .03)  | .06 (-.06, .19)  | .07 (-.03, .15)  | -.01 (-.06, .04) | .05 (-.03, .15)  | .07 (-.00, .14)  | .01 (-.03, .05)  | .05 (-.03, .15)  | .08 (-.00, .14)   | .01 (-.02, .04)  |
| Alcohol use                          | .03 (-.06, .12)  | -.03 (-.09, .04) | .01 (-.02, .04)  | -.05 (-.18, .10) | .00 (-.11, .12)  | .07 (-.02, .13)  | .07 (-.03, .16)  | -.04 (-.11, .04) | -.02 (-.06, .01) | .00 (-.11, .10)  | .00 (-.09, .09)   | .01 (-.02, .04)  |
| Ever smoked                          | .01 (-.06, .08)  | -.07 (-.12, .02) | -.01 (-.03, .02) | -.04 (-.15, .06) | -.02 (-.10, .06) | .00 (-.05, .05)  | .05 (-.03, .13)  | -.11 (-.17, .05) | -.01 (-.04, .02) | .00 (-.09, .07)  | -.07 (-.13, .00)  | -.01 (-.04, .02) |
| Ever vaped                           | -.10 (-.19, .02) | -.04 (-.10, .03) | -.01 (-.04, .02) | -.10 (-.24, .03) | -.05 (-.14, .05) | .01 (-.05, .06)  | -.11 (-.21, .00) | -.02 (-.10, .06) | -.02 (-.06, .02) | -.07 (-.17, .03) | -.06 (-.14, .01)  | -.04 (-.04, .02) |
| Cognitive enhancers                  | .07 (-.01, .14)  | -.06 (-.11, .01) | -.01 (-.04, .02) | .05 (-.09, .17)  | -.05 (-.13, .05) | .00 (-.06, .05)  | .08 (-.02, .18)  | -.06 (-.14, .02) | -.02 (-.06, .02) | .07 (-.03, .17)  | -.06 (-.14, .03)  | -.01 (-.05, .02) |
| Big 5 Agreeableness                  | .01 (-.05, .07)  | .01 (-.03, .05)  | .00 (-.03, .03)  | .01 (-.10, .12)  | .02 (-.06, .09)  | .01 (-.05, .06)  | .01 (-.07, .08)  | .01 (-.04, .06)  | -.01 (-.05, .03) | .01 (-.06, .07)  | .01 (-.04, .06)   | .00 (-.03, .03)  |
| Big 5 Conscientiousness              | .04 (-.02, .10)  | .01 (-.03, .05)  | .05 (-.02, .08)  | .00 (-.10, .09)  | .02 (-.04, .09)  | .05 (-.00, .10)  | .06 (-.02, .14)  | .00 (-.05, .06)  | .05 (-.01, .09)  | .03 (-.04, .10)  | .02 (-.03, .07)   | .05 (-.01, .08)  |
| Big 5 Extraversion                   | .00 (-.07, .05)  | .04 (-.00, .08)  | .04 (-.01, .07)  | -.04 (-.14, .06) | .05 (-.02, .12)  | .03 (-.02, .08)  | .02 (-.06, .09)  | .03 (-.02, .09)  | .05 (-.01, .08)  | -.01 (-.08, .06) | .04 (-.02, .09)   | .04 (-.01, .07)  |
| Big 5 Neuroticism                    | .03 (-.05, .10)  | -.04 (-.09, .02) | -.02 (-.05, .01) | -.01 (-.15, .13) | -.04 (-.14, .06) | .01 (-.05, .06)  | .05 (-.05, .13)  | -.03 (-.10, .04) | -.03 (-.06, .01) | .03 (-.07, .13)  | -.03 (-.10, .06)  | -.01 (-.04, .02) |
| Big 5 Openness                       | .02 (-.04, .08)  | .03 (-.01, .07)  | .03 (-.00, .06)  | -.03 (-.13, .07) | .05 (-.02, .12)  | .05 (-.00, .10)  | .05 (-.03, .13)  | .02 (-.03, .07)  | .02 (-.02, .05)  | .02 (-.05, .09)  | .03 (-.02, .09)   | .04 (-.01, .07)  |

|                                           |                                               |                     |                     |                      |                     |                     |                     |                      |                     |                          |                      |                     |
|-------------------------------------------|-----------------------------------------------|---------------------|---------------------|----------------------|---------------------|---------------------|---------------------|----------------------|---------------------|--------------------------|----------------------|---------------------|
| Self-control                              | .07 ( .01<br>,.14)                            | -.01 (-.05<br>,.04) | .00 (-.03<br>,.03)  | .07 (-.04,<br>.18)   | -.01 (-.08,<br>.07) | .00 (-.06,<br>.05)  | .07 (-<br>.01,.15)  | -.01 (-<br>.07,.05)  | .00 (-<br>.03,.04)  | .07 ( .00,<br>.15)       | -.01 (-<br>.07,.05)  | .00 (-<br>.03,.03)  |
| Not planning for the future               | -.06 (-.15<br>,.02)                           | -.02 (-.08<br>,.04) | -.02 (-.05<br>,.02) | -.05 (-.17,<br>.06)  | -.02 (-.10,<br>.06) | -.01 (-.07,<br>.04) | -.08 (-<br>.18,.03) | -.02 (-<br>.10,.06)  | -.02 (-<br>.06,.03) | -.09 (-<br>.18,.00)      | .00 (-<br>.08,.07)   | -.02 (-<br>.05,.01) |
| Ambition                                  | .06 (-.02<br>,.13)                            | .02 (-.03<br>,.08)  | .04 ( .01<br>,.07)  | .05 (-.07,<br>.16)   | .03 (-.06,<br>.11)  | .04 (-.01,<br>.09)  | .06 (-<br>.03,.15)  | .02 (-<br>.05,.09)   | .04 ( .01,<br>.08)  | .06 (-<br>.02,.15)       | .01 (-<br>.06,.08)   | .04 ( .01,<br>.07)  |
| Physical activity                         | .03 (-.03<br>,.10)                            | .04 (-.01<br>,.09)  | .03 ( .01<br>,.06)  | .11 ( .00,<br>.22)   | -.01 (-.09,<br>.07) | -.01 (-.06,<br>.03) | -.01 (-<br>.09,.08) | .07 ( .01,<br>.14)   | .06 ( .03,<br>.10)  | .00 (-<br>.08,.09)       | .07 (-<br>.01,.13)   | .03 ( .00,<br>.06)  |
| Health behaviours                         | .10 ( .03<br>,.16)                            | .05 ( .00<br>,.11)  | .02 (-.01<br>,.04)  | .13 ( .02,<br>.24)   | .04 (-.04,<br>.12)  | -.01 (-.05,<br>.04) | .09 ( .00,<br>.18)  | .05 ( .00,<br>.13)   | .03 ( .00,<br>.06)  | .07 (-<br>.01,.16)       | .07 ( .01,<br>.14)   | .01 (-<br>.01,.04)  |
| Risk taking behaviour                     | -.02 (-.09<br>,.05)                           | .02 (-.04<br>,.07)  | .02 (-.01<br>,.05)  | -.17 (-.99,<br>.99)  | .19 (-.99,<br>.98)  | .03 (-.98,<br>.98)  | .02 (-<br>.06,.11)  | .01 (-<br>.06,.07)   | .00 (-<br>.04,.03)  | -.05 (-<br>.13,.03)      | .05 (-<br>.02,.11)   | -.02 (-<br>.01,.04) |
| Risky sexual behaviour                    | -.05 (-.12<br>,.01)                           | -.04 (-.09<br>,.01) | .00 (-.03<br>,.02)  | -.11 (-.21,-<br>.01) | .00 (-.08,<br>.08)  | .00 (-.04,<br>.04)  | .00 (-<br>.09,.07)  | -.08 (-.14,-<br>.01) | .00 (-<br>.03,.03)  | -.02 (-<br>.10,.05)      | -.08 (-.14,-<br>.01) | .00 (-<br>.03,.02)  |
| Media use                                 | .02 (-.04<br>,.07)                            | -.03 (-.07<br>,.01) | -.01 (-.04<br>,.01) | -.07 ( NA,<br>NA)    | -.05 ( NA,<br>NA)   | .00 ( NA,<br>NA)    | .02 (-<br>.05,.10)  | -.05 (-<br>.10,.01)  | -.02 (-<br>.05,.02) | .01 (-<br>.05,.07)       | -.02 (-<br>.07,.03)  | -.02 (-<br>.04,.01) |
| Volunteering                              | .06 (-.01<br>,.13)                            | .02 (-.04<br>,.07)  | .02 (-.01<br>,.04)  | .08 (-.03,<br>.19)   | .00 (-.08,<br>.09)  | -.01 (-.06,<br>.03) | .06 (-<br>.03,.15)  | .02 (-<br>.05,.09)   | .03 ( .00,<br>.07)  | .04 (-<br>.04,.13)       | .04 (-<br>.04,.11)   | .01 (-<br>.01,.04)  |
| Internet dating                           | .04 (-.04<br>,.12)                            | .01 (-.05<br>,.07)  | .02 (-.01<br>,.05)  | .10 (-.03,<br>.21)   | -.03 (-.11,<br>.07) | .01 (-.04,<br>.06)  | .01 (-<br>.08,.11)  | .03 (-<br>.04,.10)   | .03 (-<br>.01,.07)  | .00 (-<br>.09,.10)       | .04 (-<br>.04,.12)   | -.02 (-<br>.01,.05) |
| Internet dating                           | .02 (-.05<br>,.09)                            | .01 (-.04<br>,.06)  | .03 ( .00<br>,.06)  | .08 (-.04,<br>.19)   | -.03 (-.11,<br>.06) | .01 (-.04,<br>.06)  | -.01 (-<br>.10,.08) | .03 (-<br>.04,.10)   | .04 ( .00,<br>.07)  | -.02 (-<br>.11,.08)      | .04 (-<br>.04,.12)   | -.03 (-<br>.01,.06) |
| Financial literacy: knowledge of products | .02 (-.05<br>,.09)                            | -.01 (-.06<br>,.04) | .02 (-.01<br>,.04)  | .02 (-.09,<br>.13)   | .01 (-.08,<br>.09)  | .03 (-.01,<br>.08)  | .02 (-<br>.07,.10)  | -.01 (-<br>.07,.05)  | .00 (-<br>.03,.04)  | .02 (-<br>.08,.11)       | -.01 (-<br>.08,.07)  | .01 (-<br>.02,.04)  |
| Financial attitudes and behaviour         | .04 (-.03<br>,.11)                            | .00 (-.04<br>,.05)  | .02 (-.01<br>,.05)  | .01 (-.10,<br>.12)   | .03 (-.04,<br>.11)  | .01 (-.04,<br>.06)  | .06 (-<br>.02,.14)  | -.02 (-<br>.08,.04)  | .02 (-<br>.02,.06)  | .05 (-<br>.03,.12)       | -.01 (-<br>.07,.05)  | .01 (-<br>.02,.05)  |
|                                           | Model fitting results                         |                     |                     |                      |                     |                     |                     |                      |                     |                          |                      |                     |
|                                           | Functional outcome: planned educational level |                     |                     |                      |                     |                     |                     |                      |                     |                          |                      |                     |
|                                           | Whole sample                                  |                     |                     | Males only           |                     |                     | Females only        |                      |                     | Same-sex MZ and DZ twins |                      |                     |
| Trait                                     | A                                             | C                   | E                   | A                    | C                   | E                   | A                   | C                    | E                   | A                        | C                    | E                   |
| Daily hassles                             | -.02 (-.09<br>,.02)                           | .00 (-.04<br>,.05)  | .00 (-.03<br>,.04)  | -.07 (-.16,<br>.04)  | .00 (-.08,<br>.05)  | .01 (-.06,<br>.07)  | -.01 (-<br>.12,.08) | .02 (-<br>.05,.09)   | .01 (-<br>.05,.06)  | -.01 (-<br>.11,.05)      | .00 (-<br>.05,.08)   | .01 (-<br>.03,.05)  |
| CHAOS                                     | -.06 (-.14<br>,.03)                           | -.04 (-.10<br>,.03) | .02 (-.02<br>,.05)  | -.07 (-.21,<br>.06)  | -.02 (-.12,<br>.08) | .04 (-.03,<br>.10)  | -.05 (-<br>.16,.06) | -.04 (-<br>.12,.04)  | .01 (-<br>.04,.05)  | -.03 (-<br>.14,.01)      | -.06 (-<br>.14,.03)  | -.02 (-<br>.02,.06) |
| Childhood experiences                     | -.04 (-.12<br>,.05)                           | .00 (-.07<br>,.07)  | .00 (-.03<br>,.04)  | .00 (-.13,<br>.12)   | -.05 (-.14,<br>.05) | -.01 (-.07,<br>.04) | -.08 (-<br>.19,.03) | .04 (-<br>.05,.13)   | .02 (-<br>.02,.06)  | -.05 (-<br>.16,.06)      | .02 (-<br>.08,.11)   | .01 (-<br>.02,.04)  |
| Poor sleep quality                        | -.06 (-.14<br>,.01)                           | .00 (-.06<br>,.05)  | .01 (-.03<br>,.05)  | -.08 (-.20,<br>.06)  | -.01 (-.11,<br>.07) | .03 (-.04,<br>.09)  | -.06 (-<br>.16,.04) | .00 (-<br>.07,.08)   | .01 (-<br>.04,.06)  | -.07 (-<br>.19,.04)      | .00 (-<br>.10,.09)   | .01 (-<br>.04,.05)  |
| Marriage hopes                            | .08 (-.01<br>,.16)                            | .01 (-.05<br>,.07)  | -.03 (-.06<br>,.01) | .09 (-.05,<br>.19)   | -.02 (-.10,<br>.08) | -.02 (-.08,<br>.05) | .06 (-<br>.04,.17)  | .03 (-<br>.05,.11)   | -.03 (-<br>.07,.02) | .03 (-<br>.07,.14)       | .06 (-<br>.04,.14)   | -.02 (-<br>.06,.01) |
| Marriage worries                          | .00 (-.07<br>,.07)                            | -.02 (-.08<br>,.02) | .00 (-.03<br>,.04)  | -.02 (-.09,<br>.09)  | .00 (-.08,<br>.05)  | -.01 (-.06,<br>.05) | .01 (-<br>.09,.11)  | -.05 (-<br>.12,.03)  | .00 (-<br>.04,.05)  | .00 (-<br>.10,.10)       | -.02 (-<br>.10,.07)  | -.01 (-<br>.04,.03) |

|                                     |                  |                  |                  |                  |                  |                  |                  |                  |                  |                  |                  |                  |
|-------------------------------------|------------------|------------------|------------------|------------------|------------------|------------------|------------------|------------------|------------------|------------------|------------------|------------------|
| Quality of relationship with twin   | -.07 (-.13, .00) | .09 (.03, .15)   | -.02 (-.04, .01) | -.12 (-.23, .01) | .14 (.05, .23)   | -.02 (-.05, .02) | -.03 (-.12, .06) | .06 (-.02, .13)  | -.02 (-.05, .01) | -.05 (-.14, .03) | .07 (.00, .15)   | -.02 (-.05, .01) |
| Quality of relationship with mother | -.02 (-.09, .03) | .01 (-.03, .06)  | .03 (.00, .07)   | .00 (-.09, .06)  | .00 (-.04, .07)  | .01 (-.04, .07)  | -.04 (-.14, .05) | .02 (-.05, .09)  | .05 (.01, .09)   | -.05 (-.14, .05) | .02 (-.06, .10)  | .04 (-.00, .07)  |
| Quality of relationship with father | -.03 (-.11, .06) | .05 (-.02, .12)  | .01 (-.02, .04)  | -.08 (-.21, .05) | .11 (.00, .20)   | .02 (-.03, .08)  | .01 (-.10, .12)  | .01 (-.07, .10)  | .01 (-.03, .05)  | -.02 (-.12, .09) | .04 (-.05, .13)  | .02 (-.02, .05)  |
| Number of relationships             | -.08 (-.11, .04) | .00 (-.03, .02)  | .01 (-.02, .04)  | -.06 (-.12, .03) | .00 (-.07, .03)  | -.01 (-.06, .04) | -.08 (-.14, .01) | .00 (-.05, .04)  | .02 (-.02, .06)  | -.05 (-.14, .03) | -.04 (-.11, .03) | .00 (-.04, .03)  |
| Longest relationship                | -.05 (-.09, .01) | .00 (-.04, .02)  | -.01 (-.05, .03) | -.04 (-.12, .05) | .00 (-.06, .05)  | .03 (-.03, .10)  | -.06 (-.11, .02) | .00 (-.06, .03)  | -.03 (-.08, .02) | -.05 (-.12, .03) | .00 (-.06, .05)  | -.02 (-.06, .02) |
| Partner violence                    | -.04 (-.11, .04) | -.03 (-.09, .02) | -.02 (-.06, .02) | -.13 (-.24, .00) | -.01 (-.10, .07) | .05 (-.02, .11)  | .00 (-.09, .09)  | -.04 (-.12, .02) | -.05 (-.10, .00) | -.03 (-.12, .06) | -.04 (-.12, .02) | -.03 (-.07, .01) |
| Contact with mother                 | -.15 (-.25, .03) | -.03 (-.11, .04) | -.06 (-.12, .00) | -.14 (-.32, .05) | .03 (-.10, .15)  | -.08 (-.18, .01) | -.15 (-.28, .00) | -.06 (-.17, .03) | -.05 (-.12, .02) | -.11 (-.27, .03) | -.08 (-.20, .04) | -.07 (-.13, .02) |
| Communication with mother           | -.05 (-.18, .07) | .04 (-.06, .14)  | -.01 (-.06, .04) | .00 (-.20, .21)  | .04 (-.12, .19)  | -.03 (-.12, .06) | -.08 (-.23, .08) | .04 (-.09, .16)  | .00 (-.06, .06)  | -.09 (-.23, .08) | .05 (-.09, .17)  | -.02 (-.07, .04) |
| Contact with father                 | -.07 (-.21, .06) | -.07 (-.17, .03) | -.02 (-.08, .03) | -.08 (-.26, .14) | .01 (-.16, .14)  | -.07 (-.16, .02) | -.07 (-.24, .08) | -.11 (-.22, .01) | .01 (-.07, .08)  | -.06 (-.22, .10) | -.11 (-.23, .03) | -.03 (-.09, .03) |
| Communication with father           | .11 (.00, .22)   | -.04 (-.13, .05) | -.02 (-.07, .02) | -.02 (-.21, .17) | .07 (-.08, .20)  | -.03 (-.10, .05) | .17 (.07, .24)   | -.10 (-.17, .01) | -.02 (-.06, .02) | .19 (.09, .26)   | -.13 (-.20, .04) | -.03 (-.06, .01) |
| Peer pressure                       | .01 (-.05, .06)  | .00 (-.03, .04)  | -.02 (-.05, .02) | -.04 (-.10, .05) | .00 (-.06, .06)  | .01 (-.05, .06)  | .04 (-.04, .11)  | .00 (-.04, .06)  | -.04 (-.08, .01) | .01 (-.08, .08)  | .01 (-.04, .08)  | -.02 (-.05, .02) |
| Physical peer victimisation         | -.01 (-.05, .06) | .00 (-.05, .02)  | -.03 (-.07, .02) | -.03 (-.10, .11) | .00 (-.11, .04)  | .00 (-.07, .06)  | .01 (-.04, .11)  | .00 (-.07, .01)  | -.05 (-.11, .01) | .02 (-.06, .13)  | -.02 (-.11, .03) | -.04 (-.08, .01) |
| Social peer victimisation           | .01 (-.07, .09)  | -.03 (-.10, .01) | -.01 (-.05, .03) | .05 (-.10, .15)  | -.07 (-.15, .03) | -.01 (-.08, .06) | -.03 (-.08, .08) | .00 (-.08, .03)  | -.01 (-.05, .04) | .07 (-.03, .16)  | -.08 (-.16, .00) | -.02 (-.06, .03) |
| Verbal peer victimisation           | .01 (-.05, .10)  | -.02 (-.08, .02) | .00 (-.04, .04)  | .05 (-.08, .17)  | -.07 (-.16, .03) | -.01 (-.08, .06) | .00 (-.05, .10)  | .00 (-.07, .02)  | .00 (-.05, .05)  | .06 (-.03, .16)  | -.06 (-.12, .02) | -.01 (-.05, .03) |
| Cyber peer victimisation            | -.06 (-.11, .03) | -.01 (-.07, .02) | .01 (-.03, .05)  | .09 (-.06, .17)  | -.13 (-.19, .03) | -.01 (-.07, .06) | -.07 (-.12, .00) | .00 (-.04, .02)  | .00 (-.05, .05)  | -.03 (-.10, .07) | -.02 (-.10, .02) | .00 (-.04, .04)  |
| Physical peer perpetration          | -.03 (-.08, .02) | .00 (-.04, .02)  | -.05 (-.09, .00) | -.03 (-.12, .11) | -.01 (-.12, .05) | -.09 (-.16, .02) | -.04 (-.12, .02) | .00 (-.04, .04)  | -.01 (-.07, .06) | .04 (-.07, .12)  | -.08 (-.15, .02) | -.04 (-.09, .01) |
| Social peer perpetration            | -.02 (-.09, .06) | -.02 (-.09, .02) | .00 (-.05, .04)  | .00 (-.10, .14)  | -.03 (-.13, .03) | -.03 (-.11, .05) | .01 (-.14, .10)  | -.05 (-.12, .05) | .00 (-.06, .08)  | .04 (-.02, .13)  | -.07 (-.14, .02) | -.01 (-.06, .03) |
| Verbal peer perpetration            | -.04 (-.08, .02) | .00 (-.04, .02)  | .02 (-.01, .06)  | -.03 (-.09, .10) | .00 (-.10, .04)  | .01 (-.05, .07)  | -.05 (-.12, .02) | .00 (-.04, .04)  | .04 (-.01, .09)  | -.04 (-.08, .05) | .00 (-.07, .05)  | .01 (-.03, .05)  |
| Cyber peer perpetration             | -.07 (-.11, .01) | .00 (-.04, .02)  | .00 (-.05, .04)  | -.03 (-.11, .12) | -.01 (-.11, .03) | -.02 (-.09, .06) | -.09 (-.16, .04) | .00 (-.04, .04)  | .00 (-.05, .06)  | -.05 (-.11, .04) | .00 (-.08, .04)  | .00 (-.05, .04)  |
| Parental role aspirations           | .03 (-.03, .07)  | .00 (-.03, .04)  | -.05 (-.08, .01) | .05 (-.01, .13)  | .00 (-.05, .06)  | -.09 (-.15, .03) | .00 (-.09, .10)  | .01 (-.06, .07)  | -.02 (-.07, .03) | .02 (-.06, .06)  | .00 (-.05, .06)  | -.05 (-.09, .01) |
| Occupational role aspirations       | .09 (.04, .13)   | .00 (-.04, .03)  | .02 (-.02, .06)  | .08 (-.01, .20)  | .00 (-.09, .05)  | .04 (-.03, .11)  | .10 (.01, .18)   | .00 (-.05, .06)  | .01 (-.03, .06)  | .09 (-.02, .17)  | .02 (-.05, .10)  | .01 (-.03, .05)  |
| Homecare role aspirations           | -.06 (-.13, .02) | .00 (-.02, .05)  | .02 (-.02, .05)  | -.01 (-.11, .06) | .00 (-.05, .06)  | .00 (-.05, .06)  | -.10 (-.19, .03) | .01 (-.03, .08)  | .03 (-.02, .07)  | -.10 (-.20, .00) | .03 (-.06, .10)  | .02 (-.02, .06)  |

|                                      |                   |                  |                   |                  |                  |                  |                   |                  |                   |                   |                  |                   |
|--------------------------------------|-------------------|------------------|-------------------|------------------|------------------|------------------|-------------------|------------------|-------------------|-------------------|------------------|-------------------|
| Importance of relationships          | .03 (-.01, .07)   | .00 (-.01, .03)  | -.02 (-.06, .01)  | .04 (-.01, .12)  | .00 (-.05, .03)  | -.02 (-.07, .03) | .02 (-.07, .07)   | .00 (-.02, .07)  | -.03 (-.07, .02)  | .01 (-.07, .06)   | .01 (-.02, .07)  | -.03 (-.07, .00)  |
| Achievement motivation               | .02 (-.05, .06)   | .00 (-.03, .05)  | .03 (-.00, .07)   | .08 (-.03, .20)  | .00 (-.09, .08)  | -.02 (-.08, .04) | -.02 (-.11, .03)  | .00 (-.03, .06)  | .07 (-.02, .11)   | -.03 (-.12, .06)  | .04 (-.03, .12)  | -.03 (-.01, .07)  |
| Purpose in life                      | .01 (-.06, .08)   | .03 (-.02, .09)  | .03 (-.01, .06)   | .03 (-.10, .14)  | .04 (-.04, .14)  | .04 (-.02, .10)  | .01 (-.09, .08)   | .02 (-.03, .09)  | .02 (-.02, .07)   | -.03 (-.12, .06)  | .06 (-.02, .13)  | -.03 (-.01, .07)  |
| Importance of democracy and equality | .13 (-.09, .18)   | .00 (-.04, .02)  | .01 (-.02, .04)   | .07 (-.04, .18)  | .00 (-.08, .08)  | .03 (-.02, .09)  | .17 (-.12, .22)   | .00 (-.05, .03)  | -.01 (-.05, .04)  | .14 (-.10, .20)   | .00 (-.05, .04)  | .00 (-.03, .04)   |
| Environmental concerns               | .19 (-.13, .24)   | .00 (-.04, .04)  | .00 (-.03, .03)   | .18 (-.09, .23)  | .00 (-.05, .07)  | .01 (-.04, .06)  | .20 (-.11, .28)   | -.01 (-.06, .06) | -.01 (-.05, .03)  | .17 (-.08, .26)   | .03 (-.04, .10)  | .00 (-.04, .03)   |
| Religiosity                          | .03 (-.04, .11)   | .04 (-.02, .10)  | -.01 (-.04, .02)  | .06 (-.06, .18)  | .01 (-.09, .11)  | -.04 (-.08, .01) | .02 (-.08, .12)   | .06 (-.02, .14)  | .00 (-.03, .04)   | .01 (-.08, .10)   | .08 (-.01, .15)  | -.01 (-.04, .02)  |
| Importance of leisure                | .10 (-.02, .17)   | .02 (-.02, .08)  | -.01 (-.04, .03)  | .08 (-.06, .20)  | .05 (-.03, .16)  | -.02 (-.08, .05) | .12 (-.01, .18)   | .00 (-.03, .08)  | .00 (-.05, .05)   | .05 (-.04, .15)   | .07 (-.01, .15)  | .00 (-.04, .04)   |
| Alcohol use                          | .08 (-.00, .17)   | -.02 (-.08, .03) | -.03 (-.07, .01)  | .08 (-.09, .24)  | -.01 (-.13, .11) | -.02 (-.10, .06) | .06 (-.02, .17)   | -.02 (-.09, .03) | -.03 (-.08, .02)  | .11 (-.01, .21)   | -.05 (-.13, .05) | -.04 (-.08, .01)  |
| Ever smoked                          | -.05 (-.09, .01)  | .00 (-.04, .03)  | .00 (-.04, .03)   | -.03 (-.10, .08) | .00 (-.08, .04)  | -.02 (-.08, .04) | -.06 (-.13, .03)  | .00 (-.07, .05)  | .01 (-.04, .05)   | -.05 (-.11, .04)  | .00 (-.08, .04)  | .00 (-.04, .03)   |
| Ever vaped                           | -.11 (-.18, -.03) | -.01 (-.06, .05) | .00 (-.04, .04)   | -.08 (-.19, .06) | -.02 (-.11, .06) | -.01 (-.08, .05) | -.13 (-.23, -.02) | .00 (-.07, .08)  | .01 (-.04, .05)   | -.08 (-.19, .02)  | -.03 (-.11, .06) | .00 (-.04, .04)   |
| Cognitive enhancers                  | .02 (-.05, .09)   | .00 (-.04, .06)  | -.01 (-.05, .03)  | .04 (-.07, .16)  | .00 (-.09, .07)  | -.01 (-.07, .05) | -.01 (-.11, .10)  | .03 (-.05, .10)  | -.01 (-.06, .04)  | -.03 (-.13, .09)  | .05 (-.04, .13)  | -.01 (-.05, .03)  |
| Big 5 Agreeableness                  | .02 (-.02, .06)   | .00 (-.03, .02)  | -.02 (-.06, .02)  | .02 (-.05, .12)  | .00 (-.06, .05)  | -.03 (-.09, .04) | .02 (-.03, .07)   | .00 (-.04, .02)  | -.02 (-.07, .03)  | .03 (-.02, .09)   | .00 (-.04, .03)  | -.04 (-.08, .00)  |
| Big 5 Conscientiousness              | .02 (-.02, .06)   | .00 (-.02, .02)  | .06 (-.03, .10)   | .01 (-.05, .09)  | .00 (-.05, .04)  | .06 (-.01, .12)  | .03 (-.02, .08)   | .00 (-.02, .03)  | .07 (-.02, .12)   | .03 (-.04, .07)   | .00 (-.03, .05)  | .06 (-.02, .10)   |
| Big 5 Extraversion                   | .06 (-.03, .10)   | .00 (-.01, .04)  | -.03 (-.06, .01)  | .05 (-.05, .11)  | .00 (-.03, .07)  | -.03 (-.09, .03) | .07 (-.03, .12)   | .00 (-.02, .06)  | -.02 (-.07, .02)  | .05 (-.04, .09)   | .01 (-.02, .07)  | -.02 (-.06, .02)  |
| Big 5 Neuroticism                    | -.03 (-.10, .03)  | .00 (-.04, .04)  | -.01 (-.05, .03)  | -.09 (-.23, .05) | .00 (-.09, .10)  | .03 (-.04, .10)  | -.01 (-.08, .04)  | .00 (-.05, .05)  | -.03 (-.07, .02)  | -.05 (-.15, .04)  | .03 (-.05, .10)  | .00 (-.05, .04)   |
| Big 5 Openness                       | .04 (-.00, .08)   | .00 (-.01, .03)  | .00 (-.04, .04)   | .03 (-.08, .09)  | .00 (-.03, .08)  | .00 (-.05, .06)  | .04 (-.02, .09)   | .00 (-.02, .04)  | .00 (-.05, .05)   | .03 (-.06, .08)   | .01 (-.02, .08)  | .00 (-.04, .04)   |
| Self-control                         | .04 (-.00, .09)   | .00 (-.03, .02)  | .02 (-.02, .05)   | .04 (-.04, .13)  | .00 (-.05, .05)  | .01 (-.05, .07)  | .04 (-.01, .09)   | .00 (-.05, .03)  | .02 (-.03, .06)   | .04 (-.01, .13)   | -.01 (-.07, .03) | .02 (-.02, .05)   |
| Not planning for the future          | -.09 (-.16, -.02) | .00 (-.05, .05)  | -.02 (-.06, .02)  | -.09 (-.15, .00) | .00 (-.06, .06)  | -.01 (-.07, .05) | -.09 (-.20, .02)  | .00 (-.03, .08)  | -.03 (-.09, .02)  | -.10 (-.18, -.01) | .00 (-.07, .06)  | -.03 (-.07, .01)  |
| Ambition                             | .10 (-.04, .14)   | .00 (-.03, .04)  | .03 (-.01, .07)   | .13 (-.05, .25)  | .00 (-.09, .04)  | -.01 (-.08, .05) | .08 (-.02, .13)   | .00 (-.03, .07)  | .05 (-.01, .10)   | .10 (-.01, .14)   | .00 (-.04, .07)  | .02 (-.02, .06)   |
| Physical activity                    | .09 (-.02, .12)   | .00 (-.02, .05)  | -.01 (-.04, .03)  | .10 (-.02, .20)  | .00 (-.08, .05)  | -.05 (-.10, .01) | .05 (-.05, .12)   | .03 (-.02, .10)  | .02 (-.02, .07)   | .04 (-.05, .13)   | .05 (-.02, .13)  | .00 (-.04, .04)   |
| Health behaviours                    | .14 (-.07, .20)   | .02 (-.02, .08)  | -.02 (-.05, .01)  | .18 (-.08, .24)  | .00 (-.05, .08)  | -.03 (-.08, .02) | .11 (-.02, .20)   | .04 (-.03, .11)  | -.01 (-.05, .03)  | .15 (-.06, .24)   | .02 (-.05, .10)  | -.01 (-.04, .02)  |
| Risk taking behaviour                | .06 (-.00, .10)   | .00 (-.03, .04)  | -.05 (-.09, -.02) | .05 (-.07, .17)  | -.02 (-.11, .07) | -.06 (-.11, .00) | .08 (-.01, .12)   | .00 (-.03, .06)  | -.06 (-.10, -.01) | .05 (-.04, .11)   | .01 (-.04, .08)  | -.06 (-.09, -.02) |



|                                           |                  |                 |                  |                  |                 |                  |                  |                 |                  |                  |                  |                  |
|-------------------------------------------|------------------|-----------------|------------------|------------------|-----------------|------------------|------------------|-----------------|------------------|------------------|------------------|------------------|
| Risky sexual behaviour                    | -.05 (-.09, .01) | .00 (-.05, .03) | -.01 (-.04, .02) | -.05 (-.10, .06) | .00 (-.08, .05) | -.03 (-.08, .02) | -.06 (-.13, .03) | .00 (-.06, .05) | .00 (-.04, .03)  | -.02 (-.11, .07) | -.04 (-.11, .04) | -.02 (-.05, .01) |
| Media use                                 | -.02 (-.06, .02) | .00 (-.02, .02) | -.01 (-.04, .02) | .01 (-.04, .07)  | .00 (-.05, .03) | -.01 (-.06, .04) | -.04 (-.09, .00) | .00 (-.03, .04) | -.01 (-.05, .03) | -.03 (-.07, .03) | .00 (-.05, .02)  | -.01 (-.05, .02) |
| Volunteering                              | .11 (.06, .17)   | .00 (-.05, .03) | .00 (-.03, .03)  | .11 (.05, .23)   | .00 (-.08, .05) | -.03 (-.09, .02) | .11 (.04, .19)   | .00 (-.06, .04) | .01 (-.03, .06)  | .13 (.05, .22)   | -.02 (-.08, .05) | .00 (-.04, .03)  |
| Internet dating                           | .01 (-.06, .07)  | .00 (-.04, .05) | .01 (-.02, .05)  | .00 (-.11, .10)  | .00 (-.07, .08) | -.02 (-.07, .04) | .02 (-.07, .07)  | .00 (-.05, .06) | .03 (-.02, .07)  | .00 (-.09, .10)  | .00 (-.08, .08)  | .01 (-.03, .04)  |
| Internet dating                           | .00 (-.05, .06)  | .00 (-.04, .04) | .01 (-.02, .05)  | .00 (-.09, .12)  | .00 (-.08, .06) | -.02 (-.07, .04) | .01 (-.07, .07)  | .00 (-.04, .05) | .03 (-.02, .07)  | .01 (-.09, .11)  | -.01 (-.09, .07) | .00 (-.04, .04)  |
| Financial literacy: knowledge of products | .00 (-.04, .04)  | .00 (-.02, .04) | .02 (-.02, .05)  | .02 (-.10, .11)  | .01 (-.04, .11) | .00 (-.05, .06)  | -.03 (-.10, .03) | .00 (-.04, .04) | .04 (-.01, .08)  | -.01 (-.10, .08) | .00 (-.06, .07)  | .03 (-.01, .06)  |
| Financial attitudes and behaviour         | .03 (-.01, .07)  | .00 (-.02, .03) | .03 (.00, .07)   | .04 (-.06, .12)  | .00 (-.04, .07) | .02 (-.04, .08)  | .02 (-.04, .07)  | .00 (-.03, .04) | .04 (-.01, .09)  | .03 (-.04, .08)  | .00 (-.04, .05)  | .04 (-.00, .08)  |

Note. A= genetic influences, C= shared environmental influences, E= unique environmental influences. Scores were corrected for mean age and sex differences (see Methods).

**Table S13.** Model fitting results for bivariate analyses of genetic correlation (rA), shared environmental correlation (rC), and non-shared environmental correlation (rE) for psychological traits and functional outcomes (95% confidence intervals are in parentheses).

| Trait                               | Model fitting results         |                     |                  |                    |                     |                  |                    |                     |                  |                          |                    |                  |
|-------------------------------------|-------------------------------|---------------------|------------------|--------------------|---------------------|------------------|--------------------|---------------------|------------------|--------------------------|--------------------|------------------|
|                                     | Functional outcome: wellbeing |                     |                  |                    |                     |                  |                    |                     |                  |                          |                    |                  |
|                                     | Whole sample                  |                     |                  | Males only         |                     |                  | Females only       |                     |                  | Same-sex MZ and DZ twins |                    |                  |
|                                     | rA                            | rC                  | rE               | rA                 | rC                  | rE               | rA                 | rC                  | rE               | rA                       | rC                 | rE               |
| Daily hassles                       | -.49 (-.71, -.49)             | -1.00 (-1.00, 1.00) | -.18 (-.22, .13) | -.52 (-.86, .22)   | -.96 (-1.00, 1.00)  | -.24 (-.31, .17) | -.44 (-.76, .12)   | -1.00 (-1.00, 1.00) | -.15 (-.21, .09) | -.41 (-.73, .15)         | -1.00 (-1.00, .99) | -.17 (-.22, .13) |
| CHAOS                               | -.33 (-.77, .33)              | -.75 (-1.00, .35)   | -.25 (-.29, .20) | -.20 (-.20, .33)   | -1.00 (-1.00, 1.00) | -.28 (-.35, .20) | -.68 (-1.00, 1.00) | -.57 (-1.00, .26)   | -.23 (-.29, .17) | -.24 (-1.00, 1.00)       | -.59 (-.98, .59)   | -.25 (-.30, .20) |
| Childhood experiences               | -.36 (-.54, .35)              | -.28 (-1.00, 1.00)  | -.15 (-.21, .10) | -.19 (-.23, .12)   | -1.00 (-1.00, 1.00) | -.25 (-.34, .17) | -.46 (-.73, .46)   | -.24 (-.66, .06)    | -.10 (-.17, .04) | -.45 (-.76, .45)         | -.20 (-.53, .06)   | -.15 (-.20, .10) |
| Poor sleep quality                  | -.45 (-.75, .17)              | -.34 (-1.00, 1.00)  | -.14 (-.19, .09) | -.27 (-.70, .27)   | -1.00 (-1.00, 1.00) | -.22 (-.29, .14) | -.57 (-1.00, .47)  | -.26 (-1.00, 1.00)  | -.09 (-.15, .03) | -.41 (-1.00, .16)        | -.50 (-1.00, .06)  | -.15 (-.20, .10) |
| Marriage hopes                      | .18 (.18, .45)                | .55 (-.31, 1.00)    | .09 (.04, .14)   | 1.00 (-1.00, 1.00) | 1.00 (-1.00, 1.00)  | .06 (-.02, .14)  | .19 (.07, .54)     | .28 (-1.00, 1.00)   | .10 (.04, .16)   | .34 (-.22, 1.00)         | .16 (.16, .80)     | .09 (.04, .14)   |
| Marriage worries                    | -.34 (-.50, .15)              | -1.00 (-1.00, 1.00) | -.20 (-.25, .16) | -.40 (-.63, .09)   | -1.00 (-1.00, 1.00) | -.15 (-.23, .08) | -.30 (-.60, .30)   | -.90 (-1.00, .11)   | -.24 (-.29, .18) | -.20 (-.48, .05)         | -1.00 (-1.00, .40) | -.21 (-.25, .16) |
| Quality of relationship with twin   | .31 (.11, .52)                | .27 (.04, 1.00)     | .09 (.04, .14)   | .11 (-.18, .44)    | 1.00 (-1.00, 1.00)  | .14 (.05, .22)   | .45 (.45, .75)     | .16 (-.09, .43)     | .07 (.00, .13)   | .33 (.00, .70)           | .30 (.12, .53)     | .10 (.05, .15)   |
| Quality of relationship with mother | .34 (.18, .52)                | 1.00 (-.87, 1.00)   | .12 (.07, .17)   | .40 (.24, .73)     | -1.00 (-1.00, 1.00) | .07 (-.01, .14)  | .30 (.12, .55)     | .41 (-1.00, 1.00)   | .15 (.09, .21)   | .44 (.44, .75)           | .14 (-1.00, 1.00)  | .12 (.07, .17)   |

|                                     |                   |                     |                  |                    |                     |                  |                   |                    |                  |                    |                     |                  |
|-------------------------------------|-------------------|---------------------|------------------|--------------------|---------------------|------------------|-------------------|--------------------|------------------|--------------------|---------------------|------------------|
| Quality of relationship with father | .40 (.21,.61)     | .23 (-1.00, 1.00)   | .14 (.09,.19)    | .39 (.39,.67)      | 1.00 (-1.00, 1.00)  | .18 (.09,.26)    | .41 (.16,.71)     | .19 (-.21,.58)     | .12 (.06,.18)    | .40 (.23,.72)      | .25 (.22,.58)       | .14 (.09,.19)    |
| Number of relationships             | .12 (-.03,.29)    | -1.00 (-1.00, 1.00) | .05 (.00,.09)    | .07 (-.07,.27)     | .76 (-1.00, 1.00)   | .10 (.03,.17)    | .20 (-.04,.48)    | -1.00 (-1.00,1.00) | .01 (-.05,.07)   | .13 (.12,.45)      | -.04 (-1.00, 1.00)  | .04 (-.01,.09)   |
| Longest relationship                | .39 (.23,.67)     | -1.00 (-1.00, .81)  | .14 (.09,.19)    | .18 (.18,.72)      | -1.00 (-1.00, 1.00) | .17 (.09,.25)    | .51 (.22,.92)     | -1.00 (-1.00,1.00) | .12 (.06,.18)    | .42 (.09,.86)      | -1.00 (-1.00, 1.00) | .12 (.06,.17)    |
| Partner violence                    | -.36 (-.64,-.36)  | -1.00 (-1.00, 1.00) | -.15 (-.19,-.10) | -.24 (-.59,-.24)   | -1.00 (-1.00, 1.00) | -.18 (-.25,-.10) | -.41 (-.74,-.38)  | -1.00 (-1.00,1.00) | -.14 (-.19,-.08) | -.51 (-.74,-.41)   | -.01 (-1.00, 1.00)  | -.15 (-.20,-.11) |
| Contact with mother                 | .30 (.08,.63)     | -.28 (-1.00, 1.00)  | .03 (-.05,.12)   | .37 (.16, 1.00)    | -1.00 (-1.00, 1.00) | .08 (-.07,.22)   | .24 (-.15,.68)    | -.06 (-1.00,1.00)  | .02 (-.08,.11)   | .30 (-.20,.83)     | .03 (-1.00, 1.00)   | .03 (-.05,.12)   |
| Communication with mother           | .40 (.08,.78)     | -.08 (-1.00,.03)    | -.03 (-.11,.05)  | .45 (.45, 1.00)    | -1.00 (-1.00, 1.00) | -.04 (-.19,.11)  | .41 (.41,.94)     | -.02 (-.82,-.01)   | -.03 (-.12,.07)  | .45 (-.01, 1.00)   | -.01 (-.99,.66)     | -.03 (-.11,.05)  |
| Contact with father                 | .35 (-1.00, 1.00) | .15 (-1.00, 1.00)   | .00 (-.08,.08)   | -.15 (-1.00, 1.00) | 1.00 (-1.00, 1.00)  | .06 (-.06,.19)   | .53 (.53,1.00)    | -.02 (-.61,.12)    | -.04 (-.13,.06)  | .55 (-1.00, 1.00)  | .11 (-.32,.53)      | .01 (-.07,.08)   |
| Communication with father           | .29 (.29,.88)     | .25 (-.10, 1.00)    | .05 (-.03,.12)   | .13 (-1.00, 1.00)  | 1.00 (-1.00, 1.00)  | .11 (-.02,.24)   | .32 (-1.00,1.00)  | .24 (.09,.65)      | .01 (-.08,.10)   | .20 (-1.00, 1.00)  | .26 (-.01,.58)      | .05 (-.03,.12)   |
| Peer pressure                       | -.42 (-.66,-.22)  | 1.00 (-1.00, 1.00)  | -.16 (-.20,-.11) | -.34 (-.74,-.08)   | 1.00 (-1.00, 1.00)  | -.15 (-.23,-.08) | -.46 (-.82,-.22)  | 1.00 (-1.00,1.00)  | -.16 (-.22,-.10) | -.49 (-.86,-.17)   | 1.00 (-1.00, 1.00)  | -.16 (-.21,-.11) |
| Physical peer victimisation         | .08 (-.15,.51)    | -1.00 (-1.00, 1.00) | -.13 (-.18,-.08) | .17 (-.19, 1.00)   | -1.00 (-1.00, 1.00) | -.15 (-.22,-.07) | -.09 (-.95,1.00)  | -1.00 (-1.00,-.65) | -.11 (-.17,-.04) | .23 (-.23, 1.00)   | -1.00 (-1.00, 1.00) | -.14 (-.19,-.09) |
| Social peer victimisation           | -.17 (-.43,.14)   | -1.00 (-1.00, 1.00) | -.17 (-.22,-.12) | .07 (-1.00, 1.00)  | -1.00 (-1.00,-.25)  | -.21 (-.29,-.12) | -.21 (-.51,.15)   | -1.00 (-1.00,1.00) | -.15 (-.21,-.09) | .22 (-.24, 1.00)   | -1.00 (-1.00,-.34)  | -.17 (-.22,-.11) |
| Verbal peer victimisation           | -.31 (-.57,-.31)  | 1.00 (-1.00, 1.00)  | -.17 (-.22,-.12) | -.15 (-1.00, 1.00) | 1.00 (-1.00, 1.00)  | -.20 (-.28,-.12) | -.41 (-.76,-.19)  | 1.00 (-1.00,1.00)  | -.15 (-.21,-.09) | -.32 (-.74,.10)    | -.53 (-1.00, 1.00)  | -.17 (-.22,-.12) |
| Cyber peer victimisation            | -.26 (-.47,-.06)  | -.13 (-1.00, 1.00)  | -.14 (-.19,-.09) | -.08 (-1.00, 1.00) | -1.00 (-1.00, 1.00) | -.18 (-.27,-.09) | -.32 (-.60,-.08)  | -1.00 (-1.00,1.00) | -.12 (-.18,-.05) | -.21 (-.53,.13)    | -1.00 (-1.00, 1.00) | -.13 (-.18,-.08) |
| Physical peer perpetration          | .17 (.17,.84)     | -1.00 (-1.00, 1.00) | -.09 (-.14,-.04) | .24 (-1.00, 1.00)  | -1.00 (-1.00, 1.00) | -.12 (-.20,-.04) | -.06 (-1.00,1.00) | -1.00 (-1.00,1.00) | -.04 (-.12,.04)  | .28 (-1.00, 1.00)  | -.46 (-1.00, 1.00)  | -.09 (-.15,-.04) |
| Social peer perpetration            | -.30 (-.66,-.30)  | -1.00 (-1.00, 1.00) | -.13 (-.18,-.08) | -.20 (-1.00,-.06)  | .03 (-1.00, 1.00)   | -.19 (-.27,-.11) | -.14 (-.68,1.00)  | -1.00 (-1.00,1.00) | -.11 (-.17,-.05) | -.12 (-1.00, 1.00) | -.78 (-1.00, 1.00)  | -.13 (-.19,-.08) |
| Verbal peer perpetration            | -.12 (-.32,.09)   | -1.00 (-1.00, 1.00) | -.11 (-.16,-.06) | .01 (-.21,.33)     | 1.00 (-1.00, 1.00)  | -.18 (-.25,-.10) | -.17 (-.49,.18)   | -1.00 (-1.00,1.00) | -.06 (-.13,.00)  | -.02 (-.20,.39)    | -1.00 (-1.00, 1.00) | -.11 (-.16,-.05) |
| Cyber peer perpetration             | -.18 (-.46,.10)   | -1.00 (-1.00, 1.00) | -.10 (-.15,-.05) | -.07 (-.49,.66)    | .06 (-1.00, 1.00)   | -.14 (-.22,-.06) | -.28 (-.73,.11)   | -.41 (-1.00,.96)   | -.07 (-.13,.00)  | -.01 (-.47,.63)    | -1.00 (-1.00, 1.00) | -.10 (-.15,-.04) |
| Parental role aspirations           | .37 (.37,.62)     | -1.00 (-1.00, 1.00) | .07 (.02,.12)    | .32 (.16,.79)      | -1.00 (-1.00, 1.00) | .11 (.03,.18)    | .41 (.41,.78)     | .01 (-1.00,1.00)   | .05 (-.01,.11)   | .44 (.12,.82)      | .07 (-1.00, 1.00)   | .07 (.02,.12)    |
| Occupational role aspirations       | .08 (.08,.37)     | -1.00 ( NA, 1.00)   | .00 (-.05,.05)   | .15 (-.25, 1.00)   | -1.00 (-1.00, 1.00) | .01 (-.06,.09)   | -.03 (-.41,.34)   | 1.00 (-1.00,1.00)  | .00 (-.06,.06)   | .20 (-.22,.69)     | -1.00 (-1.00, 1.00) | .01 (-.04,.06)   |
| Homecare role aspirations           | .31 (.13,.50)     | 1.00 (-1.00, 1.00)  | .11 (.06,.16)    | .36 (.36,.74)      | -1.00 (-1.00, 1.00) | .12 (.04,.20)    | .21 (-.08,.50)    | 1.00 (-1.00,1.00)  | .11 (.05,.17)    | .22 (.22,.58)      | .62 (-1.00, 1.00)   | .12 (.07,.17)    |
| Importance of relationships         | .27 (.12,.41)     | 1.00 (-1.00, 1.00)  | .10 (.06,.15)    | .18 (-.18,.23)     | 1.00 (-1.00, 1.00)  | .11 (.04,.19)    | .40 (.31,.68)     | 1.00 (-.48,1.00)   | .09 (.03,.15)    | .28 (.16,.54)      | 1.00 (-1.00, 1.00)  | .11 (.06,.16)    |
| Achievement motivation              | .27 (.06,.50)     | -.99 (-1.00, 1.00)  | .03 (-.01,.08)   | .27 (.10,.76)      | -.99 (-1.00, 1.00)  | .05 (-.03,.13)   | .29 (.16,.61)     | -1.00 (-1.00,1.00) | .03 (-.03,.08)   | .29 (.27,.69)      | .60 (-1.00, 1.00)   | .03 (-.02,.08)   |

|                                      |                  |                     |                  |                  |                     |                  |                   |                    |                  |                  |                     |                  |
|--------------------------------------|------------------|---------------------|------------------|------------------|---------------------|------------------|-------------------|--------------------|------------------|------------------|---------------------|------------------|
| Purpose in life                      | .64 (.48,.80)    | .53 (-1.00, 1.00)   | .32 (.28,.37)    | .53 (.53,.77)    | 1.00 (-1.00, 1.00)  | .37 (.30,.44)    | .72 (.51,.97)     | 1.00 (.59,1.00)    | .30 (.24,.35)    | .75 (.75, 1.00)  | .33 (-1.00, 1.00)   | .32 (.28,.37)    |
| Importance of democracy and equality | -.03 (-.19,.14)  | -.16 (-1.00, 1.00)  | .00 (-.05,.05)   | -.06 (-.42,.01)  | 1.00 (-1.00, 1.00)  | -.01 (-.08,.07)  | -.02 (-.25,.22)   | -1.00 (-1.00,1.00) | .00 (-.06,.06)   | .08 (.01,.38)    | -1.00 (-1.00, 1.00) | .01 (-.04,.06)   |
| Environmental concerns               | -.01 (-.19,.16)  | -1.00 (-1.00, 1.00) | .02 (-.02,.07)   | -.06 (-.37,-.02) | 1.00 (-1.00, 1.00)  | .03 (-.05,.11)   | .11 (-.13,.37)    | -.99 (-1.00,1.00)  | .01 (-.05,.07)   | .05 (-.24,.35)   | -.47 (-1.00, 1.00)  | .02 (-.03,.07)   |
| Religiosity                          | .01 (-.21,.22)   | .04 (-1.00, 1.00)   | .01 (-.04,.06)   | .33 (.05,.78)    | -1.00 (-1.00, 1.00) | -.03 (-.12,.05)  | -.19 (-.50,-.17)  | .19 (-.09,.62)     | .04 (-.02,.10)   | -.06 (-.41,.03)  | .06 (-.16,.31)      | .01 (-.04,.06)   |
| Importance of leisure                | .46 (.30,.62)    | 1.00 (-1.00, 1.00)  | .18 (.13,.23)    | .37 (-.08,.37)   | 1.00 (-1.00, 1.00)  | .22 (.14,.30)    | .55 (.55,.83)     | 1.00 (-1.00,1.00)  | .16 (.09,.21)    | .43 (.43,.71)    | 1.00 (-1.00, 1.00)  | .19 (.14,.24)    |
| Alcohol use                          | -.22 (-.41,-.03) | 1.00 (-1.00, 1.00)  | -.15 (-.20,-.09) | -.31 (-.90,-.31) | 1.00 (.07, 1.00)    | -.20 (-.29,-.11) | -.10 (-.36,.18)   | -1.00 (-1.00,1.00) | -.12 (-.19,-.05) | -.30 (-.66,-.15) | .53 (.53, 1.00)     | -.14 (-.20,-.09) |
| Ever smoked                          | -.18 (-.37,-.01) | 1.00 (-.97, 1.00)   | -.07 (-.12,-.02) | -.07 (-.34,-.07) | 1.00 (-1.00, 1.00)  | -.09 (-.17,-.01) | -.28 (-.56,-.03)  | 1.00 (-1.00,1.00)  | -.06 (-.12,.00)  | -.20 (-.50,.07)  | 1.00 (-1.00, 1.00)  | -.07 (-.12,-.01) |
| Ever vaped                           | -.18 (-.45,.09)  | .03 (-1.00, 1.00)   | -.06 (-.12,-.01) | -.02 (-.02,.44)  | -1.00 (-1.00, 1.00) | -.09 (-.17,.00)  | -.34 (-.76,.03)   | .22 (-1.00,1.00)   | -.05 (-.11,.01)  | -.37 (-.86,-.10) | .34 (-1.00, 1.00)   | -.06 (-.11,-.01) |
| Cognitive enhancers                  | -.26 (-.52,-.02) | -.68 (-1.00, 1.00)  | -.10 (-.15,-.04) | .04 (-.22,.70)   | -1.00 (-1.00, 1.00) | -.17 (-.25,-.08) | -.56 (-1.00,-.22) | .24 (-1.00,1.00)   | -.05 (-.11,.01)  | -.36 (-.83,.06)  | -.06 (-1.00, 1.00)  | -.10 (-.15,-.05) |
| Big 5 Agreeableness                  | .18 (-.03,.40)   | .61 (-1.00, 1.00)   | .07 (.03,.12)    | .03 (-.32,.30)   | .80 (-1.00, 1.00)   | .11 (.03,.18)    | .29 (-.04,.61)    | 1.00 (-1.00,1.00)  | .06 (.00,.11)    | .27 (-.05,.67)   | -1.00 (-1.00, 1.00) | .08 (.03,.13)    |
| Big 5 Conscientiousness              | .50 (.33,.66)    | .04 (-1.00, 1.00)   | .17 (.13,.22)    | .38 (.17,.70)    | -.33 (-1.00, 1.00)  | .21 (.14,.28)    | .56 (.56,.86)     | 1.00 (-1.00,1.00)  | .15 (.09,.21)    | .62 (.48, 1.00)  | 1.00 (-1.00, 1.00)  | .18 (.13,.23)    |
| Big 5 Extraversion                   | .47 (.34,.61)    | 1.00 (-1.00, NA)    | .15 (.10,.19)    | .35 (.07,.54)    | 1.00 (-1.00, 1.00)  | .19 (.11,.26)    | .60 (.41,.76)     | 1.00 (-1.00,1.00)  | .12 (.06,.18)    | .47 (.46,.73)    | 1.00 (-1.00, 1.00)  | .15 (.10,.20)    |
| Big 5 Neuroticism                    | -.50 (-.66,-.50) | -1.00 (-1.00, 1.00) | -.26 (-.30,-.21) | -.39 (-.64,-.39) | -1.00 (-1.00, 1.00) | -.32 (-.39,-.25) | -.56 (-.77,-.56)  | -1.00 (-1.00,-.87) | -.22 (-.28,-.17) | -.50 (-.79,-.31) | -1.00 (-1.00, 1.00) | -.27 (-.31,-.22) |
| Big 5 Openness                       | -.32 (-.50,-.17) | -.94 (-1.00, 1.00)  | -.04 (-.09,.00)  | -.26 (-.61,-.07) | 1.00 (-1.00, 1.00)  | -.10 (-.17,-.02) | -.33 (-.60,-.12)  | -1.00 (-1.00,1.00) | -.01 (-.07,.04)  | -.39 (-.74,-.14) | 1.00 (-1.00, 1.00)  | -.04 (-.09,.01)  |
| Self-control                         | .41 (.27,.56)    | 1.00 (-1.00, 1.00)  | .22 (.18,.27)    | .38 (.07,.57)    | 1.00 (-1.00, 1.00)  | .25 (.18,.32)    | .45 (.34,.68)     | 1.00 (NA,1.00)     | .21 (.15,.26)    | .41 (.41,.65)    | 1.00 (-1.00, 1.00)  | .23 (.18,.28)    |
| Not planning for the future          | -.27 (-.55,-.27) | -1.00 (-1.00, 1.00) | -.13 (-.18,-.08) | -.28 (-.55,.01)  | -.61 (-1.00, 1.00)  | -.14 (-.21,-.06) | -.23 (-.88,-.23)  | -.45 (-1.00,1.00)  | -.13 (-.19,-.07) | -.39 (-.83,-.39) | 1.00 (-1.00, 1.00)  | -.13 (-.17,-.08) |
| Ambition                             | .46 (.25,.74)    | -1.00 (-1.00, 1.00) | .03 (-.02,.08)   | .55 (.19, 1.00)  | -1.00 (-1.00, 1.00) | .06 (-.02,.14)   | .39 (.39,.76)     | -1.00 (-1.00,1.00) | .02 (-.04,.08)   | .61 (.29, 1.00)  | -1.00 (-1.00, 1.00) | .03 (-.02,.08)   |
| Physical activity                    | .27 (.10,.48)    | -.98 (-1.00, 1.00)  | .05 (.01,.10)    | .27 (.04,.64)    | -1.00 (-1.00, 1.00) | .10 (.02,.17)    | .25 (-.01,.55)    | 1.00 (-1.00,1.00)  | .03 (-.03,.09)   | .31 (.01,.66)    | .06 (-1.00, 1.00)   | .05 (.00,.10)    |
| Health behaviours                    | .11 (-.06,.28)   | .71 (-1.00, 1.00)   | .08 (.03,.12)    | .23 (.16,.54)    | -.82 (-1.00, 1.00)  | .01 (-.07,.08)   | .02 (-.25,.27)    | .57 (-.20,1.00)    | .11 (.05,.17)    | .07 (-.22,.18)   | .50 (-1.00, 1.00)   | .07 (.02,.12)    |
| Risk taking behaviour                | -.18 (-.36,-.01) | 1.00 (-1.00, NA)    | -.15 (-.20,-.10) | -.29 (-.61,-.29) | 1.00 (.08, 1.00)    | -.14 (-.22,-.06) | -.11 (-.34,.14)   | -1.00 (-1.00,.90)  | -.16 (-.22,-.10) | -.20 (-.48,.08)  | 1.00 (-1.00, 1.00)  | -.15 (-.20,-.10) |
| Risky sexual behaviour               | .11 (-.05,.26)   | -1.00 (NA, 1.00)    | .05 (.00,.10)    | .05 (.05,.31)    | -1.00 (-1.00, 1.00) | .12 (.03,.19)    | .09 (-.13,.32)    | -.35 (-1.00,1.00)  | .01 (-.05,.08)   | -.03 (-.31,.23)  | .51 (-1.00, 1.00)   | .05 (.00,.10)    |
| Media use                            | .09 (-.04,.23)   | 1.00 (-1.00, 1.00)  | -.09 (-.14,-.04) | .18 (.18,.41)    | 1.00 (-1.00, 1.00)  | -.11 (-.18,-.03) | .11 (-.09,.34)    | -1.00 (-1.00,1.00) | -.09 (-.15,-.03) | .13 (.13,.37)    | 1.00 (-1.00, NA)    | -.08 (-.12,-.03) |

|                                           |                                           |                     |                  |                    |                    |                  |                  |                    |                  |                          |                    |                  |
|-------------------------------------------|-------------------------------------------|---------------------|------------------|--------------------|--------------------|------------------|------------------|--------------------|------------------|--------------------------|--------------------|------------------|
| Volunteering                              | .05 (-.13,.23)                            | 1.00 (-1.00,1.00)   | .03 (-.02,.07)   | .09 (-.14,.38)     | 1.00 (-1.00,1.00)  | .02 (-.05,.09)   | .00 (-.28,.26)   | 1.00 (-.71,1.00)   | .03 (-.03,.09)   | .10 (-.20,.43)           | -.30 (-1.00,1.00)  | .03 (-.02,.08)   |
| Internet dating                           | -.29 (-.53,-.08)                          | 1.00 (-1.00,1.00)   | -.20 (-.25,-.16) | -.20 (-.62,.05)    | 1.00 (-1.00,1.00)  | -.22 (-.29,-.15) | -.31 (-.64,-.15) | 1.00 (-1.00,1.00)  | -.20 (-.25,-.14) | -.20 (-.56,.21)          | .09 (-1.00,1.00)   | -.19 (-.24,-.15) |
| Internet dating                           | -.24 (-.48,-.02)                          | 1.00 (-1.00,1.00)   | -.17 (-.22,-.13) | -.09 (-.48,.29)    | 1.00 (-1.00,1.00)  | -.20 (-.27,-.12) | -.31 (-.66,-.31) | 1.00 (-.76,1.00)   | -.16 (-.22,-.10) | -.11 (-.51,.31)          | -.04 (-1.00,1.00)  | -.15 (-.20,-.11) |
| Financial literacy: knowledge of products | .32 (.16,.51)                             | 1.00 (-1.00,1.00)   | .17 (.12,.21)    | .34 (.09,.63)      | 1.00 (-1.00,1.00)  | .14 (.06,.21)    | .33 (.33,.63)    | 1.00 (-1.00,1.00)  | .18 (.12,.24)    | .30 (-.03,.63)           | 1.00 (-1.00,1.00)  | .17 (.12,.22)    |
| Financial attitudes and behaviour         | .49 (.31,.69)                             | -.62 (-1.00,1.00)   | .28 (.24,.32)    | .47 (.47,.83)      | -1.00 (-1.00,1.00) | .29 (.22,.35)    | .50 (.50,.80)    | 1.00 (-1.00,1.00)  | .27 (.22,.33)    | .55 (.25,.89)            | 1.00 (-1.00,1.00)  | .27 (.22,.31)    |
|                                           | Model fitting results                     |                     |                  |                    |                    |                  |                  |                    |                  |                          |                    |                  |
|                                           | Functional outcome: adverse mental health |                     |                  |                    |                    |                  |                  |                    |                  |                          |                    |                  |
|                                           | Whole sample                              |                     |                  | Males only         |                    |                  | Females only     |                    |                  | Same-sex MZ and DZ twins |                    |                  |
| Trait                                     | rA                                        | rC                  | rE               | rA                 | rC                 | rE               | rA               | rC                 | rE               | rA                       | rC                 | rE               |
| Daily hassles                             | .71 (.62,.82)                             | .87 (-.99,1.00)     | .43 (.39,.47)    | .65 (.65,1.00)     | 1.00 (-1.00,1.00)  | .48 (.40,.54)    | .75 (.75,.95)    | 1.00 (-1.00,1.00)  | .41 (.36,.46)    | .70 (.58,.86)            | .99 (-1.00,1.00)   | .44 (.39,.48)    |
| CHAOS                                     | .44 (.12,1.00)                            | 1.00 (.99,1.00)     | .23 (.18,.28)    | .69 (.69,1.00)     | -1.11 (-1.00,1.00) | .20 (.10,.30)    | .54 (-1.00,1.00) | 1.00 (.75,1.00)    | .24 (.17,.30)    | .38 (-.05,1.00)          | 1.00 (.97,1.00)    | .24 (.19,.30)    |
| Childhood experiences                     | .47 (.33,.59)                             | 1.00 (-1.00,1.00)   | .31 (.26,.36)    | .27 (-.16,.59)     | .45 (-1.00,1.00)   | .42 (.33,.50)    | .53 (.37,.68)    | 1.00 (-1.00,1.00)  | .27 (.20,.33)    | .55 (.37,.73)            | .21 (-1.00,1.00)   | .31 (.26,.36)    |
| Poor sleep quality                        | .74 (.64,.91)                             | 1.00 (-1.00,1.00)   | .38 (.34,.43)    | .59 (-.05,1.00)    | 1.00 (-.97,1.00)   | .41 (.32,.48)    | .77 (.77,.99)    | 1.00 (-1.00,1.00)  | .37 (.32,.43)    | .77 (.58,1.00)           | 1.00 (.74,1.00)    | .40 (.35,.44)    |
| Marriage hopes                            | -.34 (-.71,-.34)                          | 1.00 (-1.00,1.00)   | .02 (-.03,.08)   | -1.00 (-1.00,1.00) | -1.10 (-1.00,1.00) | .03 (-.07,.12)   | -.27 (-.57,-.26) | 1.00 (-1.00,1.00)  | .01 (-.05,.08)   | -.28 (-1.00,-.28)        | -.99 (-1.00,-.10)  | .03 (-.03,.09)   |
| Marriage worries                          | .31 (.29,.44)                             | 1.00 (.46,NA)       | .13 (.08,.18)    | .29 (-.14,.61)     | 1.00 (-1.00,1.00)  | .11 (.02,.20)    | .31 (.11,.44)    | 1.00 (-1.00,1.00)  | .15 (.09,.22)    | .21 (NA,.40)             | 1.00 (-1.00,1.00)  | .14 (.08,.19)    |
| Quality of relationship with twin         | -.32 (-.50,-.15)                          | -1.00 (-1.00,-1.00) | -.06 (-.12,.01)  | -.67 (-1.00,-.58)  | .13 (-1.00,1.00)   | .06 (-.05,.17)   | -.25 (-.41,-.05) | -1.00 (-1.00,-.99) | -.12 (-.19,-.04) | -.38 (-.62,-.16)         | -1.00 (-1.00,-.36) | -.07 (-.13,.00)  |
| Quality of relationship with mother       | -.31 (-.44,-.21)                          | 1.00 (-1.00,1.00)   | -.15 (-.20,-.09) | -.49 (-1.00,-.18)  | 1.00 (-1.00,1.00)  | -.06 (-.16,.04)  | -.30 (-.45,-.16) | -1.00 (-1.00,.99)  | -.18 (-.24,-.11) | -.34 (-.52,-.16)         | -.15 (-1.00,1.00)  | -.15 (-.20,-.09) |
| Quality of relationship with father       | -.43 (-.60,-.27)                          | -1.00 (-1.00,1.00)  | -.13 (-.18,-.07) | -.29 (-.73,-.29)   | -.45 (-1.00,-.40)  | -.17 (-.27,-.07) | -.51 (-.72,-.31) | 1.00 (-1.00,1.00)  | -.10 (-.17,-.04) | -.48 (-.69,-.26)         | .45 (-1.00,1.00)   | -.13 (-.18,-.07) |
| Number of relationships                   | .18 (.09,.26)                             | .73 (-1.00,1.00)    | -.01 (-.06,.04)  | .18 (.18,.58)      | -1.00 (-1.00,1.00) | -.04 (-.13,.05)  | .21 (.06,.30)    | .35 (-1.00,1.00)   | .01 (-.06,.07)   | .17 (.00,.37)            | .96 (-1.00,1.00)   | .00 (-.06,.06)   |
| Longest relationship                      | -.08 (-.20,.03)                           | -.93 (-1.00,1.00)   | -.01 (-.07,.04)  | -.02 (-.57,.62)    | -.81 (-1.00,1.00)  | -.07 (-.16,.03)  | -.09 (-.23,.03)  | .31 (-1.00,1.00)   | .01 (-.06,.08)   | -.07 (-.22,.13)          | -1.00 (-1.00,1.00) | .00 (-.06,.06)   |
| Partner violence                          | .62 (.49,.75)                             | 1.00 (-1.00,1.00)   | .16 (.11,.22)    | .36 (-.18,.36)     | 1.00 (-1.00,1.00)  | .22 (.13,.31)    | .70 (.56,.90)    | 1.00 (-1.00,1.00)  | .15 (.09,.21)    | .59 (.51,.77)            | 1.00 (-1.00,1.00)  | .17 (.11,.22)    |
| Contact with mother                       | .11 (.11,.33)                             | -1.00 (-1.00,1.00)  | -.07 (-.16,.03)  | -.08 (-.89,.42)    | 1.00 (-1.00,1.00)  | -.13 (-.30,.04)  | .14 (.14,.42)    | -1.00 (-1.00,1.00) | -.03 (-.14,.08)  | .24 (.24,.64)            | -1.00 (-1.00,-.89) | -.07 (-.17,.03)  |
| Communication with mother                 | -.13 (-.39,-.13)                          | -1.00 (-1.00,1.00)  | -.06 (-.16,.03)  | -.36 (-1.00,-.36)  | .67 (-1.00,1.00)   | -.11 (-.30,.07)  | -.08 (-.35,-.08) | -1.00 (-1.00,1.00) | -.03 (-.15,.08)  | -.03 (-.03,.22)          | -1.00 (-1.00,-.63) | -.06 (-.16,.04)  |

|                                      |                   |                     |                   |                     |                     |                   |                   |                     |                   |                    |                     |                   |
|--------------------------------------|-------------------|---------------------|-------------------|---------------------|---------------------|-------------------|-------------------|---------------------|-------------------|--------------------|---------------------|-------------------|
| Contact with father                  | .04 (-1.00, 1.00) | -1.00 (-1.00, 1.00) | -.06 (-.14, .03)  | -1.00 (-1.00, 1.00) | .76 (-1.00, 1.00)   | -.01 (-.16, .13)  | .18 (-.24, 1.00)  | -1.00 (-1.00, 1.00) | -.06 (-.17, .04)  | .17 (-1.00, 1.00)  | -1.00 (-1.00, 1.00) | -.07 (-.16, .02)  |
| Communication with father            | -.04 ( NA, NA)    | -1.00 (-1.00, 1.00) | -.08 (-.17, .00)  | -.43 (-1.00, .50)   | -.04 (-1.00, 1.00)  | -.05 (-.22, .11)  | .12 (-1.00, 1.00) | -1.00 (-1.00, .99)  | -.09 (-.19, .02)  | -.17 (-1.00, 1.00) | -1.00 (-1.00, 1.00) | -.09 (-.18, .00)  |
| Peer pressure                        | .34 (.25, .49)    | .94 (-1.00, 1.00)   | .22 (.17, .27)    | .46 (.46, 1.00)     | -1.00 (-1.00, 1.00) | .18 (.09, .27)    | .37 (.25, .51)    | -.99 (-1.00, 1.00)  | .23 (.17, .29)    | .37 (.30, .52)     | 1.00 (-1.00, 1.00)  | .21 (.16, .26)    |
| Physical peer victimisation          | .34 (.34, .47)    | -.34 (-1.00, 1.00)  | .11 (.06, .17)    | -.03 (-1.00, .27)   | 1.00 (-1.00, 1.00)  | .18 (.10, .26)    | .74 (.52, 1.00)   | -.85 (-1.00, 1.00)  | .04 (-.03, .11)   | .32 (.12, .60)     | -.85 (-1.00, 1.00)  | .13 (.07, .18)    |
| Social peer victimisation            | .60 (.49, .83)    | 1.00 (-1.00, 1.00)  | .30 (.25, .35)    | .45 (-1.00, 1.00)   | 1.00 (.89, 1.00)    | .35 (.26, .42)    | .63 (.54, .82)    | -.83 (-1.00, 1.00)  | .30 (.24, .36)    | .67 (.43, 1.00)    | 1.00 (-1.00, 1.00)  | .30 (.25, .36)    |
| Verbal peer victimisation            | .56 (.46, .69)    | .87 (-1.00, 1.00)   | .29 (.24, .33)    | .03 (-1.00, 1.00)   | 1.00 (.87, 1.00)    | .32 (.24, .40)    | .62 (.54, .86)    | -1.00 (-1.00, 1.00) | .28 (.22, .34)    | .58 (.53, .82)     | -1.00 (-1.00, 1.00) | .29 (.24, .34)    |
| Cyber peer victimisation             | .54 (.46, .65)    | .03 (-1.00, 1.00)   | .24 (.19, .29)    | -.10 (-1.00, 1.00)  | 1.00 (.48, 1.00)    | .28 (.19, .36)    | .56 (.48, .70)    | -.97 (-1.00, 1.00)  | .25 (.19, .32)    | .53 (.43, .71)     | 1.00 (-1.00, 1.00)  | .24 (.19, .30)    |
| Physical peer perpetration           | .28 (.28, .48)    | -.61 (-1.00, 1.00)  | .08 (.03, .13)    | .11 (-1.00, 1.00)   | 1.00 (-1.00, 1.00)  | .11 (.03, .19)    | .75 (.35, 1.00)   | -.36 (-1.00, 1.00)  | .02 (-.05, .10)   | .56 (.07, 1.00)    | -1.00 (-1.00, 1.00) | .09 (.03, .14)    |
| Social peer perpetration             | .59 (.46, .95)    | .63 ( NA, 1.00)     | .23 (.18, .28)    | .58 (-1.00, 1.00)   | 1.00 (-1.00, 1.00)  | .24 (.15, .33)    | .63 (.43, 1.00)   | -1.00 (-1.00, 1.00) | .23 (.17, .29)    | .71 (.43, 1.00)    | -1.00 (-1.00, 1.00) | .23 (.17, .28)    |
| Verbal peer perpetration             | .26 (.16, .36)    | -.37 (-1.00, 1.00)  | .21 (.16, .26)    | .13 (-.39, .47)     | 1.00 (-1.00, 1.00)  | .21 (.13, .30)    | .33 (.22, .49)    | -.84 (-1.00, 1.00)  | .21 (.15, .27)    | .26 (.09, .42)     | -1.00 (-1.00, 1.00) | .21 (.16, .26)    |
| Cyber peer perpetration              | .31 (.21, .40)    | .87 (-1.00, 1.00)   | .20 (.15, .25)    | .21 (-1.00, 1.00)   | 1.00 (-1.00, 1.00)  | .18 (.09, .27)    | .30 (.16, .49)    | .42 (-1.00, 1.00)   | .22 (.16, .28)    | .28 (-.01, .32)    | 1.00 (-1.00, 1.00)  | .20 (.15, .25)    |
| Parental role aspirations            | -.29 (-.43, -.19) | -.85 (-1.00, 1.00)  | -.05 (-.10, .00)  | -.37 (-.90, -.37)   | -1.00 (-1.00, 1.00) | -.04 (-.13, .04)  | -.29 (-.47, -.26) | 1.00 (-1.00, 1.00)  | -.05 (-.12, .01)  | -.28 (-.44, -.20)  | -1.00 (-1.00, 1.00) | -.04 (-.09, .02)  |
| Occupational role aspirations        | -.18 (-.46, -.10) | 1.00 (-1.00, 1.00)  | .00 (-.05, .05)   | -.61 (-1.00, -.13)  | 1.00 (-1.00, 1.00)  | .03 (-.06, .12)   | -.10 (-.35, -.10) | 1.00 (-1.00, 1.00)  | -.01 (-.07, .06)  | -.32 (-.73, -.07)  | 1.00 (-1.00, 1.00)  | .01 (-.05, .06)   |
| Homecare role aspirations            | -.16 (-.26, -.06) | -.50 (-1.00, 1.00)  | .01 (-.04, .06)   | -.19 (-.56, -.19)   | -1.00 (-1.00, 1.00) | .02 (-.07, .11)   | -.15 (-.30, -.01) | -.69 (-1.00, 1.00)  | .00 (-.06, .06)   | -.10 (-.32, -.10)  | -1.00 (-1.00, 1.00) | .00 (-.05, .06)   |
| Importance of relationships          | -.22 (-.30, -.11) | -.96 (-1.00, .98)   | -.06 (-.11, -.01) | -.13 (-.13, .19)    | -1.00 (-1.00, 1.00) | .00 (-.09, .09)   | -.24 (-.33, -.14) | .92 (-1.00, 1.00)   | -.12 (-.18, -.05) | -.18 (-.29, -.01)  | -1.00 (-1.00, 1.00) | -.07 (-.13, -.02) |
| Achievement motivation               | -.13 (-.29, -.03) | .02 (-1.00, 1.00)   | -.01 (-.06, .04)  | .08 (-.35, .74)     | -1.00 (-1.00, 1.00) | -.01 (-.10, .08)  | -.13 (-.35, -.04) | .99 (-1.00, 1.00)   | -.02 (-.08, .04)  | -.16 (-.39, -.11)  | .88 (-1.00, 1.00)   | .00 (-.06, .05)   |
| Purpose in life                      | -.75 (-.88, -.65) | 1.00 (-1.00, 1.00)  | -.47 (-.51, -.43) | -1.00 (-1.00, -.72) | .96 (-1.00, 1.00)   | -.41 (-.48, -.34) | -.72 (-.84, -.64) | -1.00 (-1.00, 1.00) | -.50 (-.54, -.45) | -.75 (-.91, -.61)  | -40 (-1.00, 1.00)   | -.47 (-.51, -.42) |
| Importance of democracy and equality | .06 (-.04, .14)   | .09 ( NA, 1.00)     | .01 (-.04, .06)   | .29 (.01, .87)      | -1.00 (-1.00, 1.00) | .01 (-.09, .10)   | .04 (-.09, .13)   | .85 (-1.00, 1.00)   | .00 (-.07, .06)   | .04 (-.12, .16)    | 1.00 (-1.00, 1.00)  | .01 (-.05, .07)   |
| Environmental concerns               | .00 (-.11, .11)   | 1.00 (-1.00, 1.00)  | -.06 (-.11, -.01) | -.04 (-.30, .14)    | -1.00 (-1.00, 1.00) | .00 (-.09, .10)   | .00 (-.15, .15)   | 1.00 (-1.00, 1.00)  | -.09 (-.16, -.03) | .02 (-.16, .21)    | -1.00 (-1.00, 1.00) | -.06 (-.11, .00)  |
| Religiosity                          | .08 (-.10, .26)   | -1.00 (-1.00, 1.00) | .12 (.06, .17)    | -.41 (-1.00, .02)   | .13 (-1.00, 1.00)   | .25 (.15, .34)    | .20 (.00, .41)    | -1.00 (-1.00, 1.00) | .06 (-.01, .13)   | .03 (-.21, .18)    | -1.00 ( NA, 1.00)   | .12 (.06, .17)    |
| Importance of leisure                | -.58 (-.66, -.52) | -1.00 (-1.00, 1.00) | -.27 (-.32, -.22) | -.54 (-.96, -.54)   | -1.00 (-1.00, 1.00) | -.30 (-.38, -.21) | -.58 (-.68, -.47) | .44 (-1.00, 1.00)   | -.26 (-.32, -.20) | -.53 (-.67, -.49)  | -1.00 (-1.00, 1.00) | -.28 (-.33, -.22) |
| Alcohol use                          | .18 (.03, .34)    | -1.00 (-1.00, 1.00) | .16 (.10, .22)    | .49 (.49, 1.00)     | -1.00 (-1.00, .05)  | .16 (.06, .26)    | .16 (.04, .27)    | -.09 (-1.00, 1.00)  | .14 (.07, .21)    | .15 (-.06, .36)    | -1.00 (-1.00, 1.00) | .15 (.08, .21)    |

|                                           |                       |                     |                  |                   |                     |                  |                  |                    |                  |                  |                     |                  |
|-------------------------------------------|-----------------------|---------------------|------------------|-------------------|---------------------|------------------|------------------|--------------------|------------------|------------------|---------------------|------------------|
| Ever smoked                               | .13 (.02,.22)         | .51 (-.95, 1.00)    | .10 (.05,.16)    | .01 (-.47,.01)    | 1.00 (-1.00, 1.00)  | .14 (.05,.23)    | .15 (.03,.29)    | -1.00 (-1.00,1.00) | .09 (.02,.15)    | .11 (-.03,.28)   | -1.00 (-1.00, 1.00) | .11 (.05,.16)    |
| Ever vaped                                | .35 (.20,.56)         | -1.00 (-1.00, 1.00) | .06 (.01,.12)    | .16 (-.36,.59)    | 1.00 (-1.00, 1.00)  | .13 (.03,.22)    | .44 (.44,.73)    | -1.00 (-1.00,1.00) | .03 (-.03,.10)   | .44 (.18,.76)    | -1.00 (-1.00, 1.00) | .05 (-.01,.11)   |
| Cognitive enhancers                       | .39 (.26,.56)         | 1.00 (-1.00, 1.00)  | .12 (.06,.17)    | .23 (-.29,.71)    | .05 (-1.00, 1.00)   | .14 (.05,.23)    | .50 (.50,.74)    | 1.00 (-1.00,1.00)  | .11 (.04,.17)    | .54 (.42,.88)    | -1.00 (-1.00, 1.00) | .12 (.07,.18)    |
| Big 5 Agreeableness                       | -.17 (-.29,-.06)      | .99 (-1.00, 1.00)   | -.08 (-.14,-.03) | -.31 (-1.00,-.03) | 1.00 (-1.00, 1.00)  | -.04 (-.13,.05)  | -.26 (-.40,-.11) | -.57 (-1.00,1.00)  | -.10 (-.16,-.04) | -.20 (-.39,-.16) | 1.00 (-1.00, 1.00)  | -.10 (-.15,-.04) |
| Big 5 Conscientiousness                   | -.46 (-.56,-.38)      | -.83 (-1.00, 1.00)  | -.17 (-.22,-.12) | -.39 (-.75,-.39)  | -1.00 (-1.00, 1.00) | -.21 (-.29,-.12) | -.52 (-.65,-.42) | -.75 (-1.00,1.00)  | -.15 (-.21,-.09) | -.46 (-.60,-.37) | -.49 (-1.00, 1.00)  | -.17 (-.22,-.12) |
| Big 5 Extraversion                        | -.56 (-.63,-.49)      | -.50 (-1.00, 1.00)  | -.28 (-.33,-.24) | -.45 (-.77,-.26)  | -1.00 (-1.00, 1.00) | -.27 (-.35,-.19) | -.62 (-.70,-.55) | -.89 (-1.00,1.00)  | -.30 (-.36,-.24) | -.57 (-.65,-.47) | -1.00 (-1.00, 1.00) | -.29 (-.34,-.24) |
| Big 5 Neuroticism                         | .83 (.77,.94)         | 1.00 (-1.00, 1.00)  | .56 (.52,.59)    | .92 (.66, 1.00)   | .12 (-1.00, 1.00)   | .54 (.48,.61)    | .83 (.79,.93)    | .05 (-1.00,1.00)   | .56 (.52,.60)    | .83 (.78,.95)    | 1.00 (-1.00, 1.00)  | .55 (.51,.59)    |
| Big 5 Openness                            | .19 (.11,.28)         | -.80 (-1.00, 1.00)  | .05 (.00,.11)    | .18 (-.11,.49)    | 1.00 (-1.00, 1.00)  | .17 (.08,.25)    | .19 (.09,.29)    | .15 (-1.00,1.00)   | -.01 (-.07,.06)  | .16 (.04,.30)    | 1.00 (-1.00, 1.00)  | .05 (.00,.10)    |
| Self-control                              | -.61 (-.68,-.55)      | -.85 (-1.00, 1.00)  | -.34 (-.38,-.29) | -.63 (-1.00,-.63) | -1.00 (-1.00, 1.00) | -.37 (-.44,-.29) | -.62 (-.70,-.55) | -.67 (-1.00,1.00)  | -.32 (-.37,-.26) | -.62 (-.69,-.53) | .20 ( NA, 1.00)     | -.33 (-.38,-.28) |
| Not planning for the future               | .30 (.26,.48)         | 1.00 (-1.00, 1.00)  | .12 (.07,.17)    | .47 (.09, 1.00)   | -.91 (-1.00, 1.00)  | .09 (.00,.18)    | .26 (.26,.79)    | 1.00 (-1.00,1.00)  | .12 (.06,.19)    | .27 (.22,.51)    | .68 (-1.00, 1.00)   | .11 (.06,.16)    |
| Ambition                                  | -.29 (-.49,-.19)      | 1.00 (-1.00, 1.00)  | -.07 (-.12,-.02) | -.44 (-1.00,-.09) | 1.00 (-1.00, 1.00)  | -.09 (-.19,.00)  | -.25 (-.49,-.15) | .31 (-1.00,1.00)   | -.06 (-.12,.01)  | -.35 (-.59,-.19) | 1.00 (-1.00, 1.00)  | -.06 (-.12,-.01) |
| Physical activity                         | -.28 (-.37,-.16)      | -.95 (-1.00, 1.00)  | -.01 (-.07,.04)  | -.33 (-.75,.01)   | -1.00 (-1.00, 1.00) | -.06 (-.15,.03)  | -.25 (-.36,-.11) | -.93 (-1.00,1.00)  | .01 (-.05,.07)   | -.18 (-.35,-.13) | -1.00 (-1.00, 1.00) | -.01 (-.07,.05)  |
| Health behaviours                         | -.31 (-.43,-.19)      | -1.00 (-1.00, 1.00) | -.07 (-.13,-.02) | -.53 (-1.00,-.50) | 1.00 (-1.00, 1.00)  | -.02 (-.12,.08)  | -.27 (-.41,-.12) | -1.00 (-1.00,1.00) | -.10 (-.17,-.03) | -.23 (-.39,-.07) | -1.00 (-1.00, 1.00) | -.07 (-.12,-.01) |
| Risk taking behaviour                     | .10 (.00,.19)         | .53 (-1.00, 1.00)   | .12 (.07,.17)    | .07 (-.38,.29)    | -.36 (-1.00, 1.00)  | .13 (.03,.23)    | .15 (.04,.24)    | -.95 (-1.00,1.00)  | .11 (.05,.18)    | .09 (-.08,.22)   | 1.00 (-1.00, 1.00)  | .12 (.06,.18)    |
| Risky sexual behaviour                    | .08 (.00,.18)         | -.01 (-1.00, 1.00)  | -.02 (-.07,.03)  | .29 (.29,.78)     | -1.00 (-1.00, 1.00) | -.09 (-.18,.01)  | .05 (-.08,.15)   | 1.00 (-1.00,1.00)  | .01 (-.06,.08)   | .12 (-.05,.21)   | -1.00 (-1.00, 1.00) | -.02 (-.08,.04)  |
| Media use                                 | .01 (-.05,.09)        | -.58 (-1.00, 1.00)  | .08 (.02,.13)    | -.07 (-.34,-.07)  | -1.00 (-1.00, 1.00) | .09 (.00,.18)    | .05 (-.04,.14)   | -.79 (-1.00, NA)   | .07 (.00,.13)    | -.01 (-.10,.03)  | -1.00 (-1.00, 1.00) | .06 (.01,.12)    |
| Volunteering                              | .05 (-.10,.13)        | 1.00 (-1.00, 1.00)  | .02 (-.03,.07)   | -.25 (-.96,-.25)  | 1.00 (-1.00, 1.00)  | .10 (.01,.19)    | .09 (-.03,.21)   | .82 (-1.00,1.00)   | .00 (-.07,.06)   | .00 (-.19,.17)   | 1.00 (-1.00, 1.00)  | .03 (-.02,.09)   |
| Internet dating                           | .10 (.07,.20)         | -1.00 (-1.00, 1.00) | .10 (.04,.15)    | .09 (-.44,.55)    | -1.00 (-1.00, 1.00) | .13 (.03,.22)    | .13 (-.03,.31)   | -.99 (-1.00,1.00)  | .08 (.02,.14)    | .01 (-.26,.24)   | 1.00 (-1.00, 1.00)  | .08 (.03,.14)    |
| Internet dating                           | .11 (-.01,.25)        | -.72 (-1.00, 1.00)  | .08 (.03,.13)    | .07 (-.46,.55)    | -1.00 (-1.00, 1.00) | .11 (.01,.20)    | .14 (.00,.29)    | .00 (-1.00,1.00)   | .07 (.01,.13)    | -.01 (-.30,-.01) | 1.00 (-1.00, 1.00)  | .07 (.02,.13)    |
| Financial literacy: knowledge of products | -.30 (-.42,-.21)      | .91 (-1.00, 1.00)   | -.03 (-.08,.02)  | -.23 (-.63,.12)   | -1.00 (-1.00, 1.00) | -.05 (-.15,.04)  | -.34 (-.50,-.23) | .94 (-1.00,1.00)   | -.02 (-.09,.04)  | -.32 (-.56,-.14) | 1.00 (-1.00, 1.00)  | -.03 (-.09,.03)  |
| Financial attitudes and behaviour         | -.25 (-.38,-.16)      | .05 (-1.00, 1.00)   | -.14 (-.19,-.09) | -.27 (-.76,.17)   | .80 (-1.00, NA)     | -.16 (-.25,-.07) | -.26 (-.40,-.15) | .38 (-1.00,1.00)   | -.12 (-.18,-.06) | -.24 (-.44,-.19) | .99 (-1.00, 1.00)   | -.12 (-.18,-.07) |
| Trait                                     | Model fitting results |                     |                  |                   |                     |                  |                  |                    |                  |                  |                     |                  |

|                                     | Functional outcome: adverse physical health |                     |                  |                    |                     |                  |                   |                    |                  |                          |                     |                  |
|-------------------------------------|---------------------------------------------|---------------------|------------------|--------------------|---------------------|------------------|-------------------|--------------------|------------------|--------------------------|---------------------|------------------|
|                                     | Whole sample                                |                     |                  | Males only         |                     |                  | Females only      |                    |                  | Same-sex MZ and DZ twins |                     |                  |
|                                     | rA                                          | rC                  | rE               | rA                 | rC                  | rE               | rA                | rC                 | rE               | rA                       | rC                  | rE               |
| Daily hassles                       | .46 (.38,.69)                               | 1.00 (-1.00, 1.00)  | .18 (.14,.23)    | .50 (.31,.99)      | -.89 (-1.00, 1.00)  | .17 (.10,.25)    | .37 (.37,.72)     | .96 (-1.00,1.00)   | .19 (.13,.25)    | .44 (.44,.73)            | 1.00 (-1.00, 1.00)  | .18 (.13,.23)    |
| CHAOS                               | .27 (.27,.81)                               | 1.00 (.83, 1.00)    | .15 (.10,.20)    | .38 (-.01,.79)     | -1.00 (-1.00, 1.00) | .09 (.00,.18)    | .22 (-1.00,1.00)  | 1.00 (.31,1.00)    | .17 (.11,.23)    | .09 (-1.00, 1.00)        | .80 (.72, 1.00)     | .16 (.11,.21)    |
| Childhood experiences               | .32 (.24,.49)                               | 1.00 (-1.00, 1.00)  | .15 (.10,.21)    | .05 (-.29,.05)     | 1.00 (-1.00, NA)    | .29 (.20,.38)    | .42 (.18,.67)     | .26 (-1.00,1.00)   | .11 (.05,.17)    | .39 (.39,.65)            | .09 (-1.00, 1.00)   | .16 (.10,.21)    |
| Poor sleep quality                  | .74 (.52, 1.00)                             | -1.00 (-1.00, 1.00) | .24 (.19,.28)    | .67 (.67, 1.00)    | 1.00 (-1.00, 1.00)  | .24 (.16,.31)    | .90 (.71,1.00)    | -.47 (-1.00,1.00)  | .23 (.17,.29)    | .88 (.88, NA)            | .37 (-1.00, 1.00)   | .23 (.19,.28)    |
| Marriage hopes                      | .06 (.06,.36)                               | -1.00 ( NA,-1.00)   | -.01 (-.05,.04)  | .96 (-1.00, 1.00)  | -1.00 (-1.00, 1.00) | .02 (-.06,.11)   | .06 (.06,.44)     | -1.00 (-1.00,-.44) | -.02 (-.08,.04)  | .19 (-.31,.96)           | -.78 (-1.00,.09)    | -.01 (-.06,.04)  |
| Marriage worries                    | .11 (-.11,.28)                              | 1.00 (-1.00, 1.00)  | .09 (.04,.14)    | .29 (.06,.52)      | .76 (-1.00, 1.00)   | -.01 (-.09,.07)  | -.02 (-.38,.26)   | 1.00 (-1.00,1.00)  | .13 (.08,.19)    | .02 (-.30,.34)           | .89 (-1.00, 1.00)   | .10 (.05,.15)    |
| Quality of relationship with twin   | -.22 (-.44,-.01)                            | -.70 (-1.00, 1.00)  | .02 (-.04,.07)   | -.19 (-.60,.12)    | -1.00 (-1.00, 1.00) | .04 (-.05,.14)   | -.28 (-.57,-.01)  | -.23 (-1.00,1.00)  | .01 (-.06,.08)   | -.27 (-.62,.04)          | -.30 (-1.00,.01)    | .01 (-.04,.07)   |
| Quality of relationship with mother | -.14 (-.31,.01)                             | 1.00 (-1.00, 1.00)  | -.06 (-.11,-.01) | -.03 (-.30,.13)    | -.44 (-1.00, 1.00)  | -.07 (-.15,.01)  | -.18 (-.43,.06)   | .51 (-1.00,1.00)   | -.06 (-.13,.00)  | -.14 (-.40,.11)          | .16 (-1.00, 1.00)   | -.06 (-.11,.00)  |
| Quality of relationship with father | -.30 (-.52,-.09)                            | 1.00 (-1.00, 1.00)  | -.05 (-.10,.00)  | -.20 (-.56,.10)    | 1.00 (-1.00, 1.00)  | -.10 (-.19,-.01) | -.34 (-.65,-.06)  | .16 (-1.00,1.00)   | -.03 (-.10,.03)  | -.25 (-.56,.04)          | -.06 (-1.00, 1.00)  | -.05 (-.11,.00)  |
| Number of relationships             | .31 (.19,.42)                               | 1.00 (-1.00, 1.00)  | .03 (-.02,.08)   | .22 (.09,.45)      | -.50 (-1.00, 1.00)  | .03 (-.05,.11)   | .30 (.08,.49)     | 1.00 (-1.00,1.00)  | .04 (-.02,.10)   | .23 (.00,.50)            | .79 (-1.00, 1.00)   | .04 (-.01,.09)   |
| Longest relationship                | .13 (-.04,.28)                              | 1.00 (-1.00, 1.00)  | -.06 (-.11,-.01) | .15 (-.22,.15)     | .58 (-1.00, 1.00)   | -.10 (-.18,-.01) | .13 (-.10,.39)    | 1.00 (-1.00,1.00)  | -.04 (-.10,.02)  | .05 (-.27,.35)           | 1.00 (-1.00, 1.00)  | -.04 (-.10,.01)  |
| Partner violence                    | .54 (.54,.85)                               | 1.00 (-1.00, NA)    | .08 (.03,.13)    | .42 (.42, 1.00)    | -1.00 (-1.00, 1.00) | .08 (-.01,.16)   | .57 (.57,.87)     | 1.00 (-1.00,1.00)  | .09 (.03,.14)    | .54 (.54,.91)            | 1.00 (-1.00, 1.00)  | .08 (.03,.13)    |
| Contact with mother                 | .08 (-.13,.39)                              | 1.00 (-1.00, 1.00)  | -.05 (-.13,.04)  | .00 (-.63,.00)     | 1.00 (-1.00, 1.00)  | -.03 (-.18,.11)  | .20 (-.18,.56)    | -.09 (-1.00,1.00)  | -.06 (-.17,.05)  | .07 (.07,.54)            | .29 (-1.00, 1.00)   | -.05 (-.14,.04)  |
| Communication with mother           | -.13 (-.46,.10)                             | 1.00 (-1.00, 1.00)  | -.05 (-.13,.04)  | -.07 (-.62,.51)    | 1.00 (-1.00, 1.00)  | -.11 (-.25,.05)  | -.07 (-.55,.40)   | .09 (-1.00,1.00)   | -.03 (-.14,.07)  | -.13 (-.57,.31)          | .31 (-1.00, 1.00)   | -.04 (-.13,.05)  |
| Contact with father                 | -.06 (-1.00, 1.00)                          | 1.00 (-1.00, 1.00)  | -.01 (-.09,.06)  | .00 (-1.00, 1.00)  | 1.00 (-1.00, 1.00)  | -.02 (-.15,.12)  | -.04 (-1.00,1.00) | .19 (-1.00,1.00)   | -.02 (-.12,.08)  | -.08 (-1.00, 1.00)       | .11 (-1.00, 1.00)   | -.02 (-.10,.07)  |
| Communication with father           | -.02 (-.02,.48)                             | -1.00 ( NA, 1.00)   | -.10 (-.17,-.02) | -.10 (-1.00, 1.00) | -1.00 (-1.00, 1.00) | -.02 (-.16,.12)  | .04 (-1.00,1.00)  | -.38 (-1.00,1.00)  | -.14 (-.23,-.04) | -.20 (-1.00, 1.00)       | -.10 (-1.00, 1.00)  | -.10 (-.18,-.03) |
| Peer pressure                       | .30 (.15,.54)                               | -1.00 (-1.00, 1.00) | .08 (.03,.12)    | .21 (.04,.53)      | -.87 (-1.00, 1.00)  | .11 (.03,.19)    | .36 (.34,.71)     | -1.00 (-1.00,1.00) | .06 (.00,.12)    | .42 (.18,.72)            | -1.00 (-1.00, 1.00) | .08 (.03,.13)    |
| Physical peer victimisation         | .32 (.01, NA)                               | 1.00 (-1.00, 1.00)  | .06 (.01,.11)    | .05 (-1.00,.05)    | 1.00 (-1.00, 1.00)  | .10 (.02,.18)    | .86 (.39,1.00)    | .93 (-1.00,1.00)   | .01 (-.05,.08)   | .28 (.28,.68)            | 1.00 (-1.00, 1.00)  | .09 (.04,.14)    |
| Social peer victimisation           | .52 (.33,.85)                               | 1.00 (-1.00, 1.00)  | .08 (.03,.13)    | 1.00 (-1.00, 1.00) | 1.00 (-1.00, 1.00)  | .11 (.02,.20)    | .58 (.52,.88)     | 1.00 (-1.00,1.00)  | .07 (.01,.13)    | .55 (.12, 1.00)          | .48 (-1.00, 1.00)   | .08 (.03,.14)    |

|                                      |                  |                     |                  |                   |                     |                  |                  |                    |                  |                   |                     |                  |
|--------------------------------------|------------------|---------------------|------------------|-------------------|---------------------|------------------|------------------|--------------------|------------------|-------------------|---------------------|------------------|
| Verbal peer victimisation            | .50 (.50,.74)    | -1.00 (-1.00, 1.00) | .10 (.05,.15)    | .44 (-1.00, 1.00) | 1.00 (-1.00, 1.00)  | .07 (-.02,.15)   | .61 (.40,.97)    | -1.00 (-1.00,1.00) | .12 (.06,.18)    | .46 (.46,.86)     | .85 (-.39, 1.00)    | .10 (.05,.15)    |
| Cyber peer victimisation             | .55 (.42,.79)    | -.88 (-1.00, 1.00)  | .09 (.04,.14)    | .25 (-1.00, 1.00) | 1.00 (-.30, 1.00)   | .14 (.05,.23)    | .71 (.52,1.00)   | -1.00 (-1.00,1.00) | .07 (.01,.13)    | .62 (.62,.95)     | .89 (-1.00, 1.00)   | .09 (.04,.14)    |
| Physical peer perpetration           | .36 (.08,.69)    | 1.00 (-.83, 1.00)   | -.01 (-.05,.04)  | .25 (-1.00, 1.00) | .94 (-1.00, 1.00)   | .03 (-.05,.10)   | 1.00 (.55,1.00)  | -1.00 (-1.00,1.00) | -.07 (-.13,.00)  | .51 (-1.00, 1.00) | -.63 (-1.00, 1.00)  | -.01 (-.06,.05)  |
| Social peer perpetration             | .40 (.25,.86)    | -1.00 (-1.00, 1.00) | .10 (.05,.14)    | .35 (.35,.99)     | -.74 (-1.00, 1.00)  | .08 (.00,.17)    | .50 (.08,1.00)   | -1.00 (-1.00,1.00) | .10 (.04,.16)    | .58 (.05, 1.00)   | -.53 (-1.00, 1.00)  | .09 (.03,.14)    |
| Verbal peer perpetration             | .33 (.21,.53)    | -.99 (-1.00, 1.00)  | .04 (-.01,.08)   | .29 (.07,.57)     | -.12 (-1.00, 1.00)  | .00 (-.08,.08)   | .43 (.43,.80)    | -1.00 (-1.00,1.00) | .05 (-.01,.11)   | .33 (.23,.66)     | 1.00 (-1.00, 1.00)  | .03 (-.02,.08)   |
| Cyber peer perpetration              | .37 (.31,.64)    | -1.00 (-1.00, 1.00) | .07 (.02,.12)    | .31 (-.20,.79)    | .88 (-1.00, 1.00)   | .05 (-.04,.13)   | .54 (.54,1.00)   | -1.00 (-1.00,1.00) | .07 (.01,.13)    | .43 (.43,.89)     | -.01 (-1.00, 1.00)  | .07 (.02,.12)    |
| Parental role aspirations            | -.04 (-.21,.13)  | .63 (-1.00, 1.00)   | -.05 (-.09,.00)  | .16 (-.04,.59)    | -1.00 (-1.00, 1.00) | -.13 (-.21,-.05) | -.18 (-.52,.12)  | .59 (-1.00,1.00)   | .00 (-.06,.06)   | -.02 (-.28,.26)   | -1.00 (-1.00, 1.00) | -.05 (-.10,.00)  |
| Occupational role aspirations        | -.16 (-.46,.02)  | 1.00 (-1.00, 1.00)  | -.01 (-.05,.04)  | -.07 (-.96,.08)   | 1.00 (-1.00, 1.00)  | -.05 (-.12,.04)  | -.16 (-.53,-.16) | 1.00 (-1.00,1.00)  | .01 (-.05,.07)   | -.27 (-.71,.07)   | 1.00 (-1.00, 1.00)  | .00 (-.05,.05)   |
| Homecare role aspirations            | -.04 (-.17,.14)  | -1.00 (-1.00, 1.00) | .01 (-.04,.06)   | -.09 (-.26,.19)   | .38 (-1.00, 1.00)   | -.01 (-.09,.07)  | .00 (-.25,.27)   | -1.00 (-1.00,1.00) | .03 (-.03,.09)   | .03 (-.08,.34)    | -.60 (-1.00, 1.00)  | -.01 (-.06,.05)  |
| Importance of relationships          | .01 (-.09,.16)   | -1.00 (-1.00, 1.00) | -.03 (-.07,.02)  | .14 (.00,.53)     | -1.00 (-1.00, 1.00) | -.06 (-.13,.02)  | -.08 (-.27,.02)  | -1.00 (-1.00,1.00) | -.01 (-.07,.05)  | .07 (-.03,.32)    | -1.00 (-1.00, 1.00) | -.04 (-.09,.01)  |
| Achievement motivation               | -.09 (-.25,.08)  | -1.00 (-1.00, 1.00) | .01 (-.04,.05)   | .06 (-.13,.60)    | -1.00 (-1.00, 1.00) | -.03 (-.11,.06)  | -.14 (-.42,.05)  | 1.00 (-1.00,1.00)  | .02 (-.04,.08)   | -.04 (-.37,.25)   | -.63 (-1.00, 1.00)  | .01 (-.05,.06)   |
| Purpose in life                      | -.40 (-.60,-.22) | 1.00 (-1.00, 1.00)  | -.18 (-.23,-.13) | -.35 (-.76,-.08)  | 1.00 (-1.00, 1.00)  | -.19 (-.27,-.10) | -.41 (-.66,-.36) | 1.00 (-1.00,1.00)  | -.18 (-.24,-.12) | -.53 (-.83,-.25)  | .59 (-1.00, 1.00)   | -.18 (-.23,-.13) |
| Importance of democracy and equality | .03 (-.09,.15)   | .26 (-1.00, NA)     | -.04 (-.08,.01)  | .17 (.11,.50)     | 1.00 (-1.00, 1.00)  | -.10 (-.18,-.01) | -.05 (-.22,-.03) | -.40 (-1.00,1.00)  | -.01 (-.07,.05)  | -.01 (-.09,.22)   | .00 (-1.00, 1.00)   | -.04 (-.09,.01)  |
| Environmental concerns               | -.11 (-.26,.03)  | -1.00 (-1.00, 1.00) | -.05 (-.10,.00)  | -.11 (-.26,.16)   | -1.00 (-1.00, 1.00) | -.07 (-.15,.02)  | -.18 (-.43,-.11) | .39 (-1.00,1.00)   | -.03 (-.10,.03)  | -.10 (-.35,-.10)  | -.30 (-1.00, 1.00)  | -.05 (-.11,.00)  |
| Religiosity                          | .11 (-.11,.33)   | -1.00 (-1.00, 1.00) | .01 (-.05,.06)   | .10 (-.28,.50)    | -1.00 (-1.00, 1.00) | -.02 (-.11,.07)  | .13 (-.14,.42)   | -.25 (-1.00,1.00)  | .02 (-.05,.08)   | .20 (-.10,.52)    | -.15 (-1.00, 1.00)  | .01 (-.04,.06)   |
| Importance of leisure                | -.28 (-.42,-.10) | -1.00 (-1.00, 1.00) | -.16 (-.21,-.12) | -.08 (-.31,.42)   | -1.00 ( NA, 1.00)   | -.21 (-.29,-.13) | -.36 (-.58,-.15) | -1.00 (-1.00,1.00) | -.15 (-.21,-.09) | -.21 (-.47,-.02)  | -1.00 (-1.00, 1.00) | -.18 (-.23,-.13) |
| Alcohol use                          | .32 (.13,.55)    | -1.00 ( NA, 1.00)   | .03 (-.02,.09)   | .51 (.51, 1.00)   | -1.00 (-1.00, 1.00) | .01 (-.09,.11)   | .23 (.02,.49)    | -1.00 (-1.00,1.00) | .05 (-.02,.12)   | .47 (.16,.83)     | -.99 (-1.00,.17)    | .02 (-.04,.08)   |
| Ever smoked                          | .15 (.02,.30)    | -.44 (-1.00, 1.00)  | .07 (.03,.12)    | .15 (-.02,.40)    | -.95 (-1.00, 1.00)  | .07 (-.01,.16)   | .12 (-.10,.36)   | 1.00 (-1.00,1.00)  | .08 (.02,.14)    | .17 (-.06,.40)    | -.11 (-1.00, 1.00)  | .07 (.02,.12)    |
| Ever vaped                           | .34 (.25,.59)    | -1.00 ( NA, 1.00)   | .06 (.00,.11)    | .25 (.16,.62)     | -1.00 (-1.00, 1.00) | .08 (-.01,.16)   | .38 (.24,.76)    | -.08 (-1.00,1.00)  | .05 (-.01,.11)   | .32 (-.04,.71)    | .15 (-1.00, 1.00)   | .05 (-.01,.10)   |
| Cognitive enhancers                  | .44 (.23,.69)    | -1.00 (-1.00, 1.00) | .06 (.01,.11)    | .23 (-.04,.67)    | -1.00 (-1.00, 1.00) | .13 (.04,.21)    | .54 (.45,.97)    | -.41 (-1.00,1.00)  | .03 (-.03,.10)   | .58 (.20, 1.00)   | -.25 (-1.00, 1.00)  | .06 (.00,.11)    |
| Big 5 Agreeableness                  | -.12 (-.28,.03)  | -.72 (-1.00, 1.00)  | -.03 (-.07,.02)  | -.01 (-.29,.03)   | -.76 (-1.00, 1.00)  | -.06 (-.14,.03)  | -.20 (-.42,.06)  | -1.00 (-1.00,96)   | -.01 (-.07,.04)  | -.15 (-.40,.11)   | -.30 (-1.00, 1.00)  | -.04 (-.09,.02)  |
| Big 5 Conscientiousness              | -.28 (-.41,-.15) | -1.00 (-1.00, NA)   | -.09 (-.14,-.04) | -.13 (-.31,.09)   | 1.00 (-1.00, 1.00)  | -.12 (-.20,-.04) | -.38 (-.61,-.19) | -1.00 (-1.00,1.00) | -.08 (-.14,-.02) | -.29 (-.50,-.09)  | -1.00 (-1.00, 1.00) | -.11 (-.16,-.05) |



|                                           |                                                |                    |                  |                   |                    |                  |                  |                    |                  |                          |                    |                  |
|-------------------------------------------|------------------------------------------------|--------------------|------------------|-------------------|--------------------|------------------|------------------|--------------------|------------------|--------------------------|--------------------|------------------|
| Big 5 Extraversion                        | -.28 (-.37,-.15)                               | -1.00 (-1.00,1.00) | -.08 (-.13,-.03) | -.12 (-.27,.10)   | -.92 (-1.00,1.00)  | -.14 (-.22,.06)  | -.35 (-.51,-.17) | -1.00 (-1.00,1.00) | -.06 (-.12,.00)  | -.25 (-.41,-.07)         | -1.00 (-1.00,1.00) | -.09 (-.15,-.04) |
| Big 5 Neuroticism                         | .50 (.34,.71)                                  | -1.00 (-1.00,1.00) | .20 (.15,.25)    | .52 (.25,1.00)    | -1.00 (-1.00,1.00) | .23 (.15,.31)    | .51 (.32,.76)    | 1.00 (.93,1.00)    | .18 (.12,.24)    | .61 (.32,.88)            | -28 (-1.00,1.00)   | .20 (.15,.25)    |
| Big 5 Openness                            | .09 (-.01,.26)                                 | -1.00 (-1.00,1.00) | -.02 (-.06,.03)  | .11 (-.06,.39)    | .74 (-1.00,1.00)   | -.01 (-.10,.07)  | .10 (.04,.32)    | -1.00 (-1.00,1.00) | -.02 (-.08,.04)  | .10 (.09,.34)            | -49 (-1.00,1.00)   | -.03 (-.08,.02)  |
| Self-control                              | -.39 (-.55,-.28)                               | .87 (-1.00,1.00)   | -.17 (-.22,-.12) | -.34 (-.64,-.16)  | -.47 (-1.00,1.00)  | -.16 (-.24,-.08) | -.43 (-.65,-.26) | -1.00 (-1.00,1.00) | -.18 (-.24,-.12) | -.46 (-.73,-.46)         | 1.00 (-1.00,1.00)  | -.17 (-.23,-.12) |
| Not planning for the future               | .04 (-.25,.26)                                 | 1.00 (-1.00,1.00)  | .09 (.04,.14)    | .09 (.09,.42)     | -.95 (-1.00,1.00)  | .11 (.03,.19)    | -.21 (-1.00,.18) | 1.00 (1.00,1.00)   | .10 (.04,.16)    | -.02 (-.45,.03)          | 1.00 (-1.00,1.00)  | .10 (.05,.15)    |
| Ambition                                  | -.17 (-.38,-.03)                               | 1.00 (-1.00,1.00)  | -.04 (-.09,.01)  | -.01 (-.40,.04)   | 1.00 (-1.00,1.00)  | -.13 (-.21,-.05) | -.20 (-.48,-.18) | -.98 (-1.00,1.00)  | .00 (-.06,.06)   | -.20 (-.47,.05)          | -.99 (-1.00,1.00)  | -.04 (-.09,.02)  |
| Physical activity                         | -.20 (-.32,-.04)                               | -1.00 (-1.00,1.00) | -.07 (-.12,-.03) | -.13 (-.31,.17)   | -.87 (-1.00,1.00)  | -.10 (-.18,-.02) | -.23 (-.45,-.02) | -1.00 (-1.00,1.00) | -.06 (-.12,.00)  | -.11 (-.36,.15)          | -1.00 (-1.00,1.00) | -.08 (-.13,-.03) |
| Health behaviours                         | -.21 (-.36,-.07)                               | -1.00 (-1.00,1.00) | -.10 (-.15,-.05) | -.19 (-.37,.01)   | -.34 (-1.00,1.00)  | -.15 (-.23,-.06) | -.18 (-.39,.03)  | -1.00 (-1.00,1.00) | -.08 (-.14,-.02) | -.15 (-.38,.06)          | -.92 (-1.00,1.00)  | -.10 (-.16,-.05) |
| Risk taking behaviour                     | .20 (.06,.37)                                  | -1.00 (-1.00,1.00) | .12 (.07,.17)    | .25 (.25,.43)     | -1.00 (-1.00,1.00) | .11 (.02,.20)    | .18 (.08,.40)    | -1.00 (-1.00,1.00) | .12 (.06,.18)    | .26 (.03,.51)            | -1.00 (-1.00,1.00) | .12 (.06,.17)    |
| Risky sexual behaviour                    | .17 (.04,.29)                                  | 1.00 (-1.00,1.00)  | .05 (.00,.10)    | .20 (.18,.51)     | -1.00 (-1.00,.68)  | .03 (-.06,.12)   | .08 (-.12,.12)   | 1.00 (-1.00,1.00)  | .07 (.01,.13)    | .16 (.04,.39)            | .21 (-1.00,1.00)   | .06 (.00,.11)    |
| Media use                                 | .05 (-.05,.13)                                 | .21 (-1.00,1.00)   | .10 (.05,.15)    | .02 (-.12,.18)    | -.70 (-1.00,1.00)  | .08 (.00,.16)    | .05 (-.14,.12)   | 1.00 (-1.00,1.00)  | .11 (.05,.17)    | .01 (-.18,.15)           | 1.00 (-1.00,1.00)  | .09 (.04,.14)    |
| Volunteering                              | .18 (.05,.37)                                  | -1.00 (-1.00,.84)  | .03 (-.02,.08)   | .14 (-.08,.34)    | .70 (-1.00,1.00)   | .03 (-.06,.11)   | .26 (.04,.55)    | -1.00 (-1.00,1.00) | .03 (-.03,.09)   | .18 (-.09,.46)           | -.03 (-1.00,1.00)  | .02 (-.04,.07)   |
| Internet dating                           | -.02 (-.28,.17)                                | 1.00 (-1.00,1.00)  | .08 (.03,.13)    | -.02 (-.42,.23)   | 1.00 (-1.00,NA)    | .06 (-.02,.15)   | -.03 (-.41,.24)  | 1.00 (-1.00,1.00)  | .09 (.03,.15)    | -.20 (-.62,.10)          | 1.00 (.26,1.00)    | .09 (.04,.14)    |
| Internet dating                           | .10 (-.12,.25)                                 | 1.00 (-1.00,1.00)  | .05 (.01,.10)    | .00 (-.33,.30)    | .47 (-1.00,1.00)   | .06 (-.02,.14)   | .11 (-.22,.33)   | 1.00 (-1.00,1.00)  | .06 (.00,.12)    | -.16 (-.58,.19)          | 1.00 (.94,1.00)    | .06 (.01,.11)    |
| Financial literacy: knowledge of products | -.09 (-.21,.10)                                | -1.00 (-1.00,1.00) | -.03 (-.08,.01)  | -.10 (-.33,.13)   | .20 (-1.00,1.00)   | -.06 (-.14,.02)  | -.04 (-.26,.27)  | -1.00 (-1.00,1.00) | -.02 (-.08,.04)  | .01 (-.28,.31)           | -1.00 (-1.00,1.00) | -.05 (-.10,.01)  |
| Financial attitudes and behaviour         | -.16 (-.30,.01)                                | -1.00 (-1.00,1.00) | -.15 (-.20,-.11) | -.12 (-.31,-.12)  | .08 (-1.00,1.00)   | -.21 (-.29,-.13) | -.15 (-.36,.14)  | -1.00 (-1.00,1.00) | -.13 (-.19,-.07) | -.17 (-.44,.00)          | .90 (-1.00,1.00)   | -.16 (-.21,-.11) |
|                                           | Model fitting results                          |                    |                  |                   |                    |                  |                  |                    |                  |                          |                    |                  |
|                                           | Functional outcome: achieved educational level |                    |                  |                   |                    |                  |                  |                    |                  |                          |                    |                  |
|                                           | Whole sample                                   |                    |                  | Males only        |                    |                  | Females only     |                    |                  | Same-sex MZ and DZ twins |                    |                  |
| Trait                                     | rA                                             | rC                 | rE               | rA                | rC                 | rE               | rA               | rC                 | rE               | rA                       | rC                 | rE               |
| Daily hassles                             | .07 (.07,.39)                                  | -.98 (-1.00,1.00)  | .00 (-.05,.05)   | .00 (-.55,.57)    | 1.00 (-1.00,1.00)  | -.01 (-.09,.07)  | .12 (-.28,.56)   | -.25 (-1.00,1.00)  | .00 (-.06,.06)   | .09 (.09,.44)            | -1.00 (-1.00,1.00) | .00 (-.05,.06)   |
| CHAOS                                     | -.09 (-.09,-.62,-.09)                          | -.33 (-.65,-.07)   | .01 (-.04,.06)   | -.39 (-1.00,-.39) | -.18 (-1.00,.57)   | .09 (.00,.17)    | .24 (-1.00,1.00) | -.36 (-.73,-.08)   | -.03 (-.09,.03)  | -.09 (-1.00,1.00)        | -.32 (-.83,.02)    | .01 (-.04,.06)   |
| Childhood experiences                     | -.05 (-.27,.16)                                | -.18 (-.56,-.13)   | .01 (-.04,.07)   | -.25 (-.77,-.25)  | -.08 (-1.00,1.00)  | .07 (-.02,.16)   | .01 (-.11,.28)   | -.16 (-.55,-.16)   | -.01 (-.08,.06)  | -.03 (-.30,.24)          | -.19 (-.69,.16)    | .01 (-.04,.07)   |

|                                     |                    |                    |                  |                    |                    |                 |                   |                     |                  |                   |                    |                  |
|-------------------------------------|--------------------|--------------------|------------------|--------------------|--------------------|-----------------|-------------------|---------------------|------------------|-------------------|--------------------|------------------|
| Poor sleep quality                  | .25 (-.05,.64)     | -1.00 (-1.00,-.41) | -.03 (-.08,.02)  | .37 (.37,1.00)     | -1.00 (-1.00,-.93) | -.02 (-.10,.06) | .21 (-.15,.70)    | -1.00 (-1.00,-1.00) | -.03 (-.09,.03)  | .50 (.02,1.00)    | -1.00 (-1.00,-.38) | -.03 (-.08,.02)  |
| Marriage hopes                      | .61 (.26,1.00)     | -.25 (-1.00,-.25)  | -.04 (-.09,.01)  | 1.00 (.21,1.00)    | -.34 (-1.00,-.34)  | -.04 (-.11,.04) | .45 (.08,.95)     | -.08 (-1.00,1.00)   | -.03 (-.09,.03)  | .67 (.40,1.00)    | -.26 (-1.00,.24)   | -.04 (-.09,.00)  |
| Marriage worries                    | .03 (-.08,.29)     | -.97 (-1.00,1.00)  | -.05 (-.09,.00)  | -.09 (-.57,.33)    | 1.00 (-1.00,1.00)  | -.03 (-.11,.05) | .14 (-.11,.54)    | -.45 (-1.00,1.00)   | -.06 (-.12,.00)  | .05 (-.24,.39)    | -.21 (-1.00,1.00)  | -.05 (-.09,.00)  |
| Quality of relationship with twin   | .00 (-.22,.23)     | .18 (.02,.38)      | -.04 (-.09,.01)  | -.04 (-.48,.41)    | .24 (-.03,1.00)    | -.04 (-.13,.05) | .02 (-.16,.31)    | .15 (-.06,.41)      | -.04 (-.11,.02)  | .04 (-.27,.36)    | .20 (-.02,.54)     | -.04 (-.09,.01)  |
| Quality of relationship with mother | .00 (-.20,.20)     | 1.00 (-1.00,NA)    | .00 (-.05,.05)   | -.07 (-.07,.43)    | 1.00 (-1.00,1.00)  | -.02 (-.10,.06) | .00 (-.26,.26)    | .13 (-1.00,1.00)    | .00 (-.06,.07)   | .11 (-.13,.37)    | -.24 (-1.00,1.00)  | .00 (-.06,.05)   |
| Quality of relationship with father | .00 (-.23,.23)     | .22 (.17,.54)      | .01 (-.04,.06)   | -.04 (-.49,.39)    | .40 (-.14,1.00)    | -.01 (-.10,.08) | .05 (-.08,.35)    | .13 (-.20,.47)      | .02 (-.04,.09)   | .14 (-.14,.42)    | .02 (-.30,.14)     | .01 (-.04,.06)   |
| Number of relationships             | -.22 (-.42,-.04)   | -1.00 (-1.00,1.00) | -.01 (-.06,.04)  | -.32 (-.72,-.03)   | 1.00 (-1.00,1.00)  | -.07 (-.14,.01) | -.09 (-.34,.14)   | -1.00 (-1.00,1.00)  | .02 (-.04,.08)   | -.13 (-.39,.11)   | -.85 (-1.00,1.00)  | -.02 (-.07,.03)  |
| Longest relationship                | -.01 (-.26,.30)    | -1.00 (-1.00,1.00) | -.05 (-.10,.00)  | .13 (-.39,1.00)    | -1.00 (-1.00,.35)  | -.05 (-.14,.03) | -.07 (-.37,.27)   | -1.00 (-1.00,1.00)  | -.05 (-.11,.01)  | -.01 (-.27,.35)   | -1.00 (-1.00,1.00) | -.06 (-.11,-.01) |
| Partner violence                    | -.23 (-.55,.08)    | -1.00 (-1.00,1.00) | -.01 (-.06,.04)  | -.59 (-1.00,-.59)  | 1.00 (-1.00,1.00)  | .05 (-.03,.13)  | -.08 (-.46,.39)   | -1.00 (-1.00,1.00)  | -.03 (-.09,.02)  | -.27 (-.65,-.24)  | -1.00 (-1.00,1.00) | -.01 (-.06,.04)  |
| Contact with mother                 | -.40 (-.76,-.40)   | -.33 (-1.00,1.00)  | -.12 (-.21,-.04) | -.31 (-1.00,-.31)  | -.23 (-1.00,1.00)  | -.12 (-.27,.03) | -.43 (-.81,-.43)  | -.40 (-1.00,1.00)   | -.13 (-.23,-.03) | -.21 (-.67,-.21)  | -.63 (-1.00,.16)   | -.12 (-.20,-.03) |
| Communication with mother           | -.02 (-.41,.37)    | -.01 (-.53,.49)    | -.03 (-.12,.05)  | .18 (-.58,1.00)    | -.38 (-1.00,.60)   | .00 (-.16,.15)  | -.16 (-.66,.31)   | .21 (-.37,1.00)     | -.05 (-.15,.06)  | -.08 (-.52,.38)   | .11 (.11,1.00)     | -.03 (-.12,.06)  |
| Contact with father                 | -1.00 (-1.00,-.50) | .25 (-.07,.73)     | .01 (-.06,.08)   | -1.00 (-1.00,-.50) | .49 (.49,1.00)     | -.03 (-.14,.08) | -.81 (-1.00,-.23) | .10 (-.35,.68)      | .02 (-.08,.11)   | -.81 (-1.00,NA)   | -.06 (-.28,.48)    | .02 (-.06,.10)   |
| Communication with father           | -.13 (-.69,-.13)   | .20 (-.04,.48)     | -.01 (-.09,.07)  | -.33 (-1.00,.50)   | .38 (-.12,1.00)    | -.02 (-.15,.12) | -.01 (-1.00,1.00) | .14 (-.12,.44)      | .00 (-.10,.10)   | .38 (-1.00,1.00)  | -.02 (-.38,.32)    | .00 (-.08,.08)   |
| Peer pressure                       | .07 (-.18,.32)     | 1.00 (-1.00,1.00)  | -.03 (-.08,.02)  | -.04 (-.48,-.04)   | 1.00 (-1.00,1.00)  | -.01 (-.09,.07) | .14 (-.18,.50)    | 1.00 (-1.00,1.00)   | -.05 (-.11,.01)  | .03 (-.20,.32)    | 1.00 (-1.00,1.00)  | -.03 (-.08,.02)  |
| Physical peer victimisation         | -.21 (-.57,.16)    | -1.00 (-1.00,1.00) | .01 (-.04,.06)   | -.16 (-.78,.53)    | -1.00 (-1.00,1.00) | .03 (-.05,.11)  | -.36 (-1.00,.94)  | -1.00 (-1.00,1.00)  | .00 (-.07,.07)   | -.03 (-.41,.52)   | -1.00 (-1.00,1.00) | .02 (-.04,.07)   |
| Social peer victimisation           | -.29 (-.64,-.29)   | .99 (-1.00,1.00)   | .01 (-.04,.07)   | -1.00 (-1.00,1.00) | .31 (.31,1.00)     | .10 (.01,.18)   | -.14 (-.52,.21)   | 1.00 (-1.00,1.00)   | -.04 (-.10,.02)  | -.39 (-1.00,-.39) | .49 (-1.00,1.00)   | .02 (-.04,.07)   |
| Verbal peer victimisation           | -.03 (-.32,.23)    | -1.00 (-1.00,.95)  | .03 (-.03,.08)   | .11 (-1.00,1.00)   | -.63 (-1.00,1.00)  | .07 (-.02,.15)  | -.06 (-.39,.27)   | -1.00 (-1.00,1.00)  | -.01 (-.08,.05)  | .09 (.02,.47)     | -1.00 (-1.00,.97)  | .02 (-.03,.08)   |
| Cyber peer victimisation            | -.24 (-.52,.02)    | -.92 (-1.00,1.00)  | .02 (-.04,.07)   | .00 (-1.00,1.00)   | -.38 (-1.00,.32)   | .04 (-.05,.14)  | -.28 (-.62,-.14)  | 1.00 (-1.00,1.00)   | -.01 (-.08,.05)  | -.23 (-.54,-.22)  | -1.00 (-1.00,1.00) | .01 (-.04,.07)   |
| Physical peer perpetration          | -.27 (-.65,.19)    | -1.00 (-1.00,1.00) | -.02 (-.07,.04)  | -.26 (-1.00,1.00)  | -1.00 (-1.00,1.00) | .00 (-.08,.07)  | -.31 (-1.00,1.00) | -1.00 (-1.00,1.00)  | -.04 (-.11,.04)  | .15 (-1.00,1.00)  | -1.00 (-1.00,-.33) | -.02 (-.07,.04)  |
| Social peer perpetration            | -.07 (-.52,.41)    | -1.00 (-1.00,.82)  | -.03 (-.08,.03)  | -.20 (-1.00,.68)   | -1.00 (-1.00,1.00) | .01 (-.08,.10)  | .01 (-.54,.82)    | -1.00 (-1.00,1.00)  | -.05 (-.11,.02)  | -.04 (-1.00,1.00) | -.41 (-1.00,1.00)  | -.03 (-.08,.03)  |
| Verbal peer perpetration            | -.03 (-.29,.23)    | -1.00 (-1.00,1.00) | -.01 (-.06,.04)  | .03 (-.42,.57)     | -1.00 (-1.00,1.00) | .06 (-.03,.14)  | -.08 (-.45,.28)   | 1.00 (-1.00,1.00)   | -.06 (-.13,.00)  | .08 (.06,.43)     | -1.00 (-1.00,1.00) | -.01 (-.06,.04)  |
| Cyber peer perpetration             | -.12 (-.46,.25)    | -1.00 (-1.00,1.00) | -.03 (-.08,.03)  | -.13 (-.83,1.00)   | -1.00 (-1.00,1.00) | .03 (-.06,.11)  | -.17 (-.64,.26)   | 1.00 (-1.00,1.00)   | -.06 (-.13,.01)  | -.03 (-.35,.38)   | -1.00 (-1.00,1.00) | -.03 (-.09,.02)  |

|                                      |                  |                     |                  |                  |                     |                 |                  |                    |                  |                  |                     |                   |
|--------------------------------------|------------------|---------------------|------------------|------------------|---------------------|-----------------|------------------|--------------------|------------------|------------------|---------------------|-------------------|
| Parental role aspirations            | .09 (-.16,.38)   | -1.00 (-1.00, 1.00) | -.06 (-.11,-.01) | .09 (-.40,.72)   | -1.00 (-1.00, 1.00) | -.02 (-.10,.06) | .10 (.10,.49)    | -.52 (-1.00,1.00)  | -.09 (-.16,-.03) | .11 (-.16,.45)   | -1.00 ( NA, 1.00)   | -.07 (-.12,-.02)  |
| Occupational role aspirations        | .27 (-.03,.58)   | 1.00 (-1.00, 1.00)  | .07 (.02,.12)    | .38 (.38, 1.00)  | -1.00 (-1.00, 1.00) | .05 (-.03,.13)  | .19 (-.20,.55)   | 1.00 (-1.00,1.00)  | .09 (.03,.15)    | .25 (.25,.63)    | 1.00 (-1.00, 1.00)  | .07 (.02,.12)     |
| Homecare role aspirations            | -.21 (-.47,.01)  | 1.00 (-1.00, 1.00)  | .01 (-.04,.06)   | .02 (.02,.17)    | -.24 (-1.00, 1.00)  | -.02 (-.10,.06) | -.40 (-.81,-.36) | 1.00 (-1.00,1.00)  | .03 (-.03,.09)   | -.29 (-.64,.01)  | .44 (-1.00, 1.00)   | .01 (-.04,.06)    |
| Importance of relationships          | .04 (-.15,.23)   | 1.00 (-1.00, NA)    | .01 (-.03,.06)   | .01 (-.23,.16)   | 1.00 (-1.00, 1.00)  | .03 (-.05,.10)  | .08 (.08,.33)    | .29 (-1.00,1.00)   | .00 (-.05,.06)   | .02 (-.19,.23)   | 1.00 (-1.00, 1.00)  | .01 (-.04,.06)    |
| Achievement motivation               | .08 (-.11,.32)   | -1.00 ( NA,.14)     | .07 (.02,.12)    | -.08 (-.71,-.08) | .46 (-1.00, 1.00)   | .10 (.02,.18)   | .15 (-.13,.45)   | -1.00 (-1.00,1.00) | .05 (-.01,.11)   | .23 (-.07,.54)   | -1.00 (-1.00, 1.00) | .06 (.01,.11)     |
| Purpose in life                      | .17 (-.06,.42)   | -.26 (-1.00, 1.00)  | .03 (-.02,.08)   | .07 (-.39,.55)   | .30 (-1.00, 1.00)   | .02 (-.06,.11)  | .24 (-.04,.55)   | -1.00 (-1.00,1.00) | .04 (-.02,.10)   | .12 (-.17,.42)   | .01 (-1.00, 1.00)   | .03 (-.02,.08)    |
| Importance of democracy and equality | .33 (.15,.54)    | 1.00 (-1.00, 1.00)  | .03 (-.02,.08)   | .31 (.31,.80)    | .28 (-1.00, 1.00)   | .01 (-.07,.10)  | .36 (.15,.63)    | 1.00 (-1.00,1.00)  | .04 (-.02,.10)   | .33 (.12,.56)    | 1.00 (-1.00, 1.00)  | .03 (-.02,.08)    |
| Environmental concerns               | .30 (.13,.50)    | 1.00 (-1.00, 1.00)  | .06 (.01,.11)    | .23 (.16,.57)    | 1.00 (-1.00, 1.00)  | .09 (.01,.17)   | .38 (.33,.66)    | .30 (-1.00,1.00)   | .04 (-.02,.10)   | .81 ( NA, NA)    | .01 (-1.00, NA)     | -.14 (-1.00,1.00) |
| Religiosity                          | .01 (-.23,.24)   | .26 (.07,.49)       | -.01 (-.06,.04)  | -.05 (-.51,.38)  | .22 (-.08, 1.00)    | .00 (-.08,.09)  | .04 (-.14,.34)   | .28 (.04,.60)      | -.01 (-.07,.05)  | -.09 (-.39,.21)  | .34 (.10,.83)       | -.01 (-.06,.04)   |
| Importance of leisure                | .17 (-.06,.40)   | 1.00 (.94, 1.00)    | .00 (-.05,.05)   | .19 (-.27,.68)   | 1.00 (-1.00, 1.00)  | -.02 (-.10,.07) | .16 (-.13,.45)   | 1.00 (.46,1.00)    | .02 (-.05,.08)   | .15 (-.11,.43)   | 1.00 (-1.00, 1.00)  | .01 (-.04,.06)    |
| Alcohol use                          | .09 (-.16,.36)   | -.38 (-1.00, 1.00)  | .02 (-.04,.08)   | -.16 (-.93,.38)  | .03 (-1.00, 1.00)   | .12 (.03,.22)   | .19 (-.09,.50)   | -1.00 (-1.00,1.00) | -.05 (-.12,.03)  | .00 (-.33,.29)   | .00 (-1.00, 1.00)   | .02 (-.04,.08)    |
| Ever smoked                          | .03 (-.16,.25)   | -1.00 (-1.00,-.44)  | -.01 (-.06,.04)  | -.13 (-.48,-.13) | -1.00 (-1.00, 1.00) | .00 (-.09,.08)  | .16 (-.08,.50)   | -1.00 (-1.00,-.78) | -.02 (-.08,.05)  | -.01 (-.23,.23)  | -1.00 (-1.00, 1.00) | -.02 (-.07,.03)   |
| Ever vaped                           | -.33 (-.64,-.33) | -.43 (-1.00, 1.00)  | -.01 (-.07,.04)  | -.33 (-.89,-.33) | -1.00 (-1.00,.97)   | .01 (-.08,.10)  | -.37 (-.80,-.01) | -.18 (-1.00,1.00)  | -.03 (-.09,.04)  | -.25 (-.64,-.25) | -.54 (-1.00, 1.00)  | -.01 (-.07,.04)   |
| Cognitive enhancers                  | .23 (-.04,.55)   | -1.00 (-1.00, 1.00) | -.02 (-.07,.03)  | .17 (-.33,.83)   | -1.00 (-1.00, 1.00) | .00 (-.09,.09)  | .28 (.28,.72)    | -.61 (-1.00,1.00)  | -.03 (-.10,.04)  | .27 (-.10,.66)   | -.48 (-1.00,-.48)   | -.02 (-.07,.03)   |
| Big 5 Agreeableness                  | .03 (-.20,.30)   | 1.00 (-1.00, 1.00)  | .00 (-.05,.05)   | .04 (-.47,.49)   | 1.00 (-1.00, 1.00)  | .01 (-.07,.09)  | .03 (-.37,.42)   | 1.00 (.09,1.00)    | -.01 (-.07,.05)  | .02 (-.27,.30)   | 1.00 (-1.00, 1.00)  | .00 (-.05,.05)    |
| Big 5 Conscientiousness              | .13 (-.10,.35)   | 1.00 (-1.00, 1.00)  | .07 (.03,.12)    | -.01 (-.48,.11)  | 1.00 (-1.00, 1.00)  | .08 (.00,.16)   | .23 (-.06,.54)   | 1.00 (-1.00,1.00)  | .07 (.01,.14)    | .11 (-.13,.34)   | 1.00 (-1.00, 1.00)  | .07 (.02,.12)     |
| Big 5 Extraversion                   | -.01 (-.23,.17)  | 1.00 (-1.00, 1.00)  | .07 (.02,.11)    | -.13 (-.67,-.12) | 1.00 (-1.00, 1.00)  | .05 (-.03,.13)  | .06 (-.21,.13)   | 1.00 (-.28,1.00)   | .08 (.02,.14)    | -.04 (-.28,.16)  | 1.00 (-1.00, 1.00)  | .07 (.02,.12)     |
| Big 5 Neuroticism                    | .10 (-.15,.38)   | -1.00 (-1.00, 1.00) | -.03 (-.08,.02)  | -.04 (-.73,-.04) | -.39 (-1.00, 1.00)  | .01 (-.08,.09)  | .15 (-.14,.48)   | -1.00 (-1.00,1.00) | -.05 (-.11,.01)  | .10 (.07,.35)    | -.41 (-1.00, 1.00)  | -.02 (-.07,.03)   |
| Big 5 Openness                       | .07 (-.15,.27)   | 1.00 (-1.00, 1.00)  | .05 (.00,.10)    | -.10 (-.63,-.10) | 1.00 (-1.00, 1.00)  | .09 (.01,.17)   | .16 (.08,.43)    | 1.00 (-1.00,1.00)  | .03 (-.03,.09)   | .07 (-.18,.29)   | 1.00 (-1.00, 1.00)  | .06 (.01,.11)     |
| Self-control                         | .23 (.03,.46)    | -1.00 (-1.00, 1.00) | .00 (-.05,.05)   | .25 (-.14,.77)   | -.99 (-1.00, 1.00)  | -.01 (-.09,.07) | .22 (-.02,.52)   | -1.00 (-1.00,1.00) | .00 (-.06,.06)   | .22 (.00,.48)    | -1.00 (-1.00, 1.00) | .00 (-.06,.05)    |
| Not planning for the future          | -.25 (-.62,-.25) | -.65 (-1.00, 1.00)  | -.02 (-.07,.03)  | -.19 (-.75,.31)  | -1.00 (-1.00, 1.00) | -.02 (-.10,.06) | -.36 (-1.00,.17) | -.20 (-1.00,1.00)  | -.02 (-.09,.04)  | -.35 (-.77,-.22) | .94 (-1.00, 1.00)   | -.03 (-.08,.02)   |
| Ambition                             | .18 (-.06,.42)   | 1.00 (-1.00, 1.00)  | .07 (.02,.12)    | .17 (-.30,.62)   | 1.00 (-1.00, 1.00)  | .06 (-.02,.14)  | .19 (-.13,.50)   | 1.00 (-1.00,1.00)  | .07 (.01,.14)    | .19 (.07,.48)    | 1.00 (-1.00, 1.00)  | .07 (.02,.12)     |

|                                           |                                               |                     |                 |                    |                     |                  |                   |                    |                 |                          |                     |                 |
|-------------------------------------------|-----------------------------------------------|---------------------|-----------------|--------------------|---------------------|------------------|-------------------|--------------------|-----------------|--------------------------|---------------------|-----------------|
| Physical activity                         | .10 (-.12,.31)                                | 1.00 (-1.00, 1.00)  | .06 (.01,.10)   | .36 (.36,.92)      | -1.00 (-1.00, 1.00) | -.02 (-.10,.06)  | -.03 (-.38,.23)   | 1.00 (.30,1.00)    | .10 (.04,.16)   | .00 (-.29,.25)           | 1.00 (-1.00, 1.00)  | .05 (.00,.10)   |
| Health behaviours                         | .26 (.07,.47)                                 | .67 (.67, 1.00)     | .03 (-.02,.08)  | .35 (.35,.76)      | 1.00 (-1.00, 1.00)  | -.01 (-.10,.07)  | .25 (.00,.52)     | .44 (NA,1.00)      | .06 (-.01,.12)  | .21 (-.03,.45)           | .66 (-.04, 1.00)    | .03 (-.02,.08)  |
| Risk taking behaviour                     | -.06 (-.27,.14)                               | 1.00 (-1.00, NA)    | .03 (-.02,.08)  | -.96 (NA, NA)      | .32 (NA, NA)        | .43 (-.99, 1.00) | .06 (-.19,.32)    | 1.00 (-1.00,1.00)  | .00 (-.07,.06)  | -.15 (-.41,.08)          | 1.00 (-1.00, 1.00)  | .03 (-.02,.08)  |
| Risky sexual behaviour                    | -.13 (-.30,.03)                               | -1.00 (-1.00, 1.00) | .00 (-.05,.05)  | -.28 (-.44,-.28)   | .27 (-1.00, 1.00)   | .00 (-.08,.08)   | -.01 (-.22,.20)   | -1.00 (-1.00,-.21) | -.01 (-.07,.05) | -.05 (-.27,.15)          | -.97 (-1.00,-.97)   | -.01 (-.06,.04) |
| Media use                                 | .05 (-.10,.23)                                | -1.00 (-1.00, 1.00) | -.02 (-.07,.03) | -.55 (NA, NA)      | -.08 (-1.00, 1.00)  | -.02 (-1.00,.98) | .06 (-.14,.31)    | -1.00 (-1.00,1.00) | -.03 (-.09,.03) | .02 (-.14,.21)           | -1.00 (-1.00, 1.00) | -.03 (-.08,.02) |
| Volunteering                              | .19 (-.02,.41)                                | 1.00 (-1.00, 1.00)  | .03 (-.02,.08)  | .23 (-.10,.66)     | 1.00 (-1.00, 1.00)  | -.03 (-.11,.06)  | .18 (-.09,.46)    | 1.00 (-1.00,1.00)  | .06 (.00,.12)   | .11 (-.14,.38)           | 1.00 (-1.00, 1.00)  | .02 (-.03,.07)  |
| Internet dating                           | .14 (-.13,.42)                                | .76 (-.96, 1.00)    | .04 (-.01,.09)  | .32 (-.32,.88)     | -1.00 (-1.00, 1.00) | .02 (-.06,.10)   | .04 (-.33,.38)    | 1.00 (-1.00,1.00)  | .05 (-.01,.11)  | .01 (-.35,.07)           | .51 (-1.00, 1.00)   | .03 (-.02,.08)  |
| Internet dating                           | .07 (.07,.33)                                 | 1.00 (-1.00, 1.00)  | .05 (.00,.09)   | .29 (.29,.88)      | -1.00 (-1.00, 1.00) | .02 (-.06,.10)   | -.05 (-.43,.27)   | 1.00 (-1.00,1.00)  | .06 (.00,.12)   | -.06 (-.43,.30)          | .42 (-1.00, 1.00)   | .04 (-.01,.09)  |
| Financial literacy: knowledge of products | .08 (-.15,.31)                                | -1.00 (-1.00, 1.00) | .03 (-.02,.07)  | .06 (-.33,.44)     | 1.00 (-1.00, 1.00)  | .06 (-.02,.14)   | .06 (-.26,.40)    | -1.00 (-1.00,1.00) | .01 (-.05,.07)  | .05 (.05,.35)            | -.70 (-1.00, 1.00)  | .02 (-.03,.07)  |
| Financial attitudes and behaviour         | .15 (-.10,.41)                                | .85 (-1.00, 1.00)   | .03 (-.02,.07)  | .03 (-.52,.49)     | 1.00 (-1.00, 1.00)  | .02 (-.06,.09)   | .22 (-.01,.60)    | -1.00 (-1.00,1.00) | .03 (-.03,.09)  | .16 (-.09,.47)           | -1.00 (-1.00, 1.00) | .02 (-.03,.07)  |
|                                           | Model fitting results                         |                     |                 |                    |                     |                  |                   |                    |                 |                          |                     |                 |
|                                           | Functional outcome: planned educational level |                     |                 |                    |                     |                  |                   |                    |                 |                          |                     |                 |
|                                           | Whole sample                                  |                     |                 | Males only         |                     |                  | Females only      |                    |                 | Same-sex MZ and DZ twins |                     |                 |
| Trait                                     | rA                                            | rC                  | rE              | rA                 | rC                  | rE               | rA                | rC                 | rE              | rA                       | rC                  | rE              |
| Daily hassles                             | -.06 (-.31,.12)                               | .63 (-1.00, 1.00)   | .01 (-.05,.07)  | -.22 (-.56,-.22)   | -.28 (-1.00, 1.00)  | .01 (-.08,.11)   | -.04 (-.46,-.04)  | 1.00 (-1.00,1.00)  | .01 (-.07,.09)  | -.04 (-.38,.18)          | .65 (-1.00, 1.00)   | .02 (-.05,.08)  |
| CHAOS                                     | -.26 (-.90,-.26)                              | -1.00 (-1.00, 1.00) | .03 (-.03,.09)  | -.22 (-.71,.23)    | -1.00 (-1.00, 1.00) | .06 (-.04,.16)   | -.45 (-1.00,-.45) | -1.00 (-1.00,1.00) | .01 (-.06,.09)  | -.15 (-1.00, 1.00)       | -1.00 (-1.00, 1.00) | .03 (-.03,.10)  |
| Childhood experiences                     | -.09 (-.30,.11)                               | -1.00 (-1.00, 1.00) | .01 (-.06,.08)  | -.01 (-.31,.38)    | -1.00 (-1.00, 1.00) | -.03 (-.14,.08)  | -.20 (-.52,.08)   | 1.00 (-1.00,1.00)  | .04 (-.05,.13)  | -.12 (-.42,.15)          | 1.00 (-1.00, 1.00)  | .02 (-.06,.09)  |
| Poor sleep quality                        | -.20 (-.47,-.20)                              | -1.00 (NA, 1.00)    | .02 (-.04,.08)  | -.27 (-1.00,.12)   | -1.00 (-1.00, 1.00) | .04 (-.06,.14)   | -.18 (-.63,-.14)  | 1.00 (-1.00,1.00)  | .01 (-.07,.09)  | -.27 (-1.00,.20)         | -1.00 (-1.00, 1.00) | .01 (-.06,.08)  |
| Marriage hopes                            | .28 (.28,.69)                                 | 1.00 (-1.00, 1.00)  | -.04 (-.10,.02) | 1.00 (-1.00, 1.00) | -1.00 (-1.00, 1.00) | -.03 (-.12,.07)  | .21 (.21,.59)     | 1.00 (-1.00,1.00)  | -.04 (-.12,.03) | .14 (.14,.76)            | 1.00 (-1.00, 1.00)  | -.04 (-.10,.02) |
| Marriage worries                          | -.01 (-.19,.23)                               | -1.00 (-1.00, 1.00) | .00 (-.06,.06)  | -.04 (-.28,.17)    | -.96 (-1.00, 1.00)  | -.01 (-.10,.08)  | .04 (-.17,.42)    | -1.00 (-1.00,1.00) | .01 (-.07,.08)  | .00 (-.30,.32)           | -1.00 (NA, 1.00)    | -.01 (-.07,.05) |
| Quality of relationship with twin         | -.22 (-.47,.01)                               | 1.00 (.33, 1.00)    | -.05 (-.11,.02) | -.44 (-.97,-.05)   | 1.00 (1.00, 1.00)   | -.04 (-.14,.06)  | -.09 (-.36,.20)   | 1.00 (-1.00,1.00)  | -.05 (-.14,.03) | -.19 (-.49,.12)          | 1.00 (-1.00, 1.00)  | -.05 (-.12,.01) |
| Quality of relationship with mother       | -.05 (-.24,.07)                               | 1.00 (-1.00, NA)    | .07 (.01,.13)   | .00 (-.27,.18)     | -.72 (-1.00, 1.00)  | .02 (-.08,.12)   | -.10 (-.38,-.10)  | 1.00 (-1.00,1.00)  | .09 (.01,.16)   | -.10 (-.37,-.10)         | 1.00 (-1.00, 1.00)  | .07 (.01,.14)   |
| Quality of relationship with father       | -.08 (-.28,.15)                               | 1.00 (-1.00, 1.00)  | .03 (-.04,.09)  | -.23 (-.79,-.19)   | 1.00 (.22, 1.00)    | .04 (-.07,.15)   | .03 (-.28,.34)    | 1.00 (-1.00,1.00)  | .01 (-.07,.10)  | -.05 (-.34,.24)          | 1.00 (-1.00, 1.00)  | .03 (-.03,.10)  |

|                               |                   |                    |                  |                   |                    |                  |                   |                    |                 |                   |                    |                  |
|-------------------------------|-------------------|--------------------|------------------|-------------------|--------------------|------------------|-------------------|--------------------|-----------------|-------------------|--------------------|------------------|
| Number of relationships       | -.18 (-.28,-.06)  | .56 (-1.00,1.00)   | .02 (-.04,.07)   | -.15 (-.22,.09)   | -.81 (-1.00,1.00)  | -.02 (-.11,.08)  | -.20 (-.28,-.03)  | -.84 (-1.00,1.00)  | .04 (-.03,.11)  | -.13 (-.34,.06)   | -1.00 (-1.00,1.00) | .00 (-.06,.06)   |
| Longest relationship          | -.15 (-.28,.01)   | -.92 (-1.00,1.00)  | -.01 (-.07,.05)  | -.14 (-.50,-.14)  | .94 (-1.00,1.00)   | .05 (-.05,.14)   | -.17 (-.34,.07)   | .69 (-1.00,1.00)   | -.05 (-.12,.03) | -.13 (-.37,.09)   | -2.27 (-1.00,1.00) | -.03 (-.10,.03)  |
| Partner violence              | -.16 (-.16,.19)   | -1.00 (-1.00,1.00) | -.03 (-.09,.03)  | -.42 (-1.00,-.42) | -1.00 (-1.00,1.00) | .07 (-.03,.16)   | -.01 (-.01,.65)   | -1.00 (-1.00,1.00) | -.07 (-.15,.00) | -.11 (-.22,.35)   | -1.00 (-1.00,1.00) | -.04 (-.10,.02)  |
| Contact with mother           | -.35 (-.61,-.35)  | -1.00 (-1.00,1.00) | -.11 (-.22,-.01) | -.34 (-1.00,-.02) | 1.00 (-1.00,NA)    | -.15 (-.33,.03)  | -.36 (-.66,.01)   | -1.00 (-1.00,-.21) | -.10 (-.23,.04) | -.29 (-.64,-.14)  | -1.00 (-1.00,1.00) | -.15 (-.26,-.03) |
| Communication with mother     | -.14 (-.54,.08)   | 1.00 (-1.00,1.00)  | -.02 (-.13,.09)  | .00 (-.72,.65)    | 1.00 (-1.00,1.00)  | -.06 (-.24,.12)  | -.21 (-.77,.23)   | 1.00 (-.18,1.00)   | .00 (-.13,.13)  | -.21 (-.67,.20)   | 1.00 (-.98,1.00)   | -.04 (-.15,.08)  |
| Contact with father           | -.32 (-1.00,1.00) | -1.00 (-1.00,.26)  | -.04 (-.15,.06)  | -.61 (-1.00,1.00) | 1.00 (-1.00,1.00)  | -.12 (-.27,.03)  | -.31 (-1.00,1.00) | -1.00 (-1.00,1.00) | .02 (-.12,.15)  | -.30 (-1.00,1.00) | -1.00 (-1.00,1.00) | -.06 (-.17,.05)  |
| Communication with father     | .53 (.01,1.00)    | -1.00 (-1.00,1.00) | -.06 (-.16,.04)  | -.09 (-1.00,1.00) | 1.00 (-1.00,1.00)  | -.06 (-.23,.11)  | 1.00 (.57,1.00)   | -1.00 (-1.00,-.91) | -.05 (-.16,.06) | 1.00 (.36,1.00)   | -1.00 (-1.00,-.94) | -.07 (-.16,.03)  |
| Peer pressure                 | .02 (-.13,.16)    | -.98 (-1.00,1.00)  | -.03 (-.08,.02)  | -.10 (-.39,.15)   | -.50 (-1.00,1.00)  | .02 (-.08,.11)   | .12 (-.13,.35)    | 1.00 (-.95,1.00)   | -.06 (-.12,.01) | .02 (-.28,.23)    | 1.00 (-1.00,1.00)  | -.02 (-.08,.04)  |
| Physical peer victimisation   | -.04 (-.12,.29)   | .02 (-1.00,1.00)   | -.04 (-.09,.02)  | -.12 (-.44,.72)   | -1.00 (-1.00,1.00) | .00 (-.10,.09)   | .08 (-1.00,1.00)  | -.90 (-1.00,1.00)  | -.07 (-.15,.01) | .06 (.06,.78)     | -1.00 (-1.00,1.00) | -.06 (-.12,.01)  |
| Social peer victimisation     | .03 (-.21,.44)    | -1.00 (-1.00,1.00) | -.01 (-.07,.05)  | 1.00 (-1.00,1.00) | -1.00 (-1.00,1.00) | -.02 (-.12,.09)  | -.08 (-.25,.32)   | -1.00 (-1.00,1.00) | -.01 (-.08,.06) | .27 (-.11,1.00)   | -1.00 (-1.00,-.15) | -.02 (-.09,.04)  |
| Verbal peer victimisation     | .05 (-.15,.41)    | -1.00 (-1.00,1.00) | .00 (-.06,.06)   | .24 (-1.00,1.00)  | -1.00 (-1.00,1.00) | -.01 (-.11,.09)  | -.01 (-.17,.36)   | -.99 (-1.00,1.00)  | .00 (-.07,.08)  | .21 (-.09,.68)    | -1.00 (-1.00,1.00) | -.02 (-.09,.05)  |
| Cyber peer victimisation      | -.17 (-.31,.10)   | -1.00 (-1.00,1.00) | .01 (-.05,.07)   | .88 (-1.00,1.00)  | -1.00 (-1.00,1.00) | -.01 (-.11,.09)  | -.18 (-.34,.00)   | -.99 (-1.00,1.00)  | .00 (-.08,.08)  | -.09 (-.09,.27)   | -1.00 (-1.00,1.00) | .01 (-.06,.07)   |
| Physical peer perpetration    | -.16 (-.28,-.16)  | .95 (-1.00,1.00)   | -.07 (-.13,.00)  | -.14 (-1.00,1.00) | -1.00 (-1.00,1.00) | -.12 (-.22,-.02) | -.33 (-1.00,1.00) | 1.00 (-1.00,1.00)  | -.01 (-.09,.08) | .31 (-1.00,1.00)  | -1.00 (-1.00,1.00) | -.06 (-.13,.01)  |
| Social peer perpetration      | -.12 (-.12,.82)   | -1.00 (-1.00,1.00) | .00 (-.06,.06)   | .01 (-1.00,1.00)  | -1.00 (-1.00,1.00) | -.04 (-.15,.07)  | .89 (-1.00,1.00)  | -1.00 (-1.00,1.00) | .00 (-.08,.10)  | .24 (-1.00,1.00)  | -1.00 (-1.00,1.00) | -.02 (-.08,.04)  |
| Verbal peer perpetration      | -.12 (-.24,.05)   | -.98 (-1.00,1.00)  | .04 (-.02,.10)   | -.08 (-.31,.41)   | -.58 (-1.00,1.00)  | .02 (-.08,.11)   | -.16 (-.39,-.10)  | .98 (-1.00,1.00)   | .06 (-.02,.13)  | -.10 (-.32,.18)   | -.59 (-1.00,1.00)  | .02 (-.04,.08)   |
| Cyber peer perpetration       | -.26 (-.40,-.06)  | -.78 (-1.00,1.00)  | .00 (-.06,.06)   | -.11 (-1.00,1.00) | -1.00 (NA,1.00)    | -.02 (-.13,.08)  | -.32 (-.48,-.10)  | .00 (NA,1.00)      | .01 (-.07,.08)  | -.18 (-.45,.21)   | -.65 (-1.00,1.00)  | -.01 (-.07,.06)  |
| Parental role aspirations     | .07 (-.10,.21)    | -.58 (-1.00,1.00)  | -.07 (-.13,-.02) | .16 (-.16,.47)    | .09 (-1.00,1.00)   | -.14 (-.23,-.04) | .01 (-.29,.30)    | 1.00 (-1.00,1.00)  | -.03 (-.11,.04) | .04 (-.20,.24)    | 1.00 (-1.00,1.00)  | -.08 (-.14,-.02) |
| Occupational role aspirations | .29 (.14,.56)     | -.49 (-1.00,1.00)  | .03 (-.03,.09)   | .26 (-.03,1.00)   | -.98 (-1.00,1.00)  | .06 (-.04,.15)   | .30 (.05,.64)     | -.06 (-1.00,1.00)  | .02 (-.05,.09)  | .27 (.27,.58)     | 1.00 (-1.00,1.00)  | .01 (-.05,.08)   |
| Homecare role aspirations     | -.15 (-.37,-.05)  | 1.00 (-.95,1.00)   | .03 (-.03,.09)   | -.03 (-.32,.17)   | -.57 (-1.00,1.00)  | .01 (-.09,.10)   | -.25 (-.66,-.08)  | 1.00 (-1.00,1.00)  | .04 (-.03,.12)  | -.27 (-.63,.00)   | 1.00 (-1.00,1.00)  | .04 (-.03,.10)   |
| Importance of relationships   | .08 (-.04,.18)    | -.85 (-1.00,1.00)  | -.04 (-.10,.02)  | .11 (-.05,.36)    | -.99 (-1.00,1.00)  | -.03 (-.12,.06)  | .05 (-.23,.05)    | 1.00 (-1.00,1.00)  | -.04 (-.12,.03) | .03 (-.21,.03)    | 1.00 (-1.00,1.00)  | -.05 (-.11,.01)  |
| Achievement motivation        | .04 (-.14,.17)    | -.51 (-1.00,1.00)  | .06 (.00,.11)    | .22 (-.12,.72)    | -1.00 (-1.00,NA)   | -.03 (-.12,.07)  | -.05 (-.35,.09)   | -.26 (-1.00,1.00)  | .11 (.04,.18)   | -.08 (-.45,.16)   | 1.00 (-1.00,1.00)  | .05 (-.01,.11)   |
| Purpose in life               | .04 (-.20,.20)    | 1.00 (-1.00,1.00)  | .05 (-.01,.11)   | .07 (-.40,.37)    | 1.00 (-1.00,1.00)  | .07 (-.03,.16)   | .02 (-.31,.21)    | 1.00 (-1.00,1.00)  | .04 (-.04,.11)  | -.08 (-.42,.06)   | 1.00 (-.05,1.00)   | .05 (-.01,.11)   |

|                                      |                  |                     |                  |                   |                     |                 |                   |                    |                  |                  |                     |                  |
|--------------------------------------|------------------|---------------------|------------------|-------------------|---------------------|-----------------|-------------------|--------------------|------------------|------------------|---------------------|------------------|
| Importance of democracy and equality | .31 (.22,.49)    | .95 (-1.00, 1.00)   | .02 (-.04,.08)   | .18 (-.12,.53)    | -1.00 (-1.00, 1.00) | .06 (-.04,.15)  | .41 (.29,.73)     | -.01 (-1.00,1.00)  | -.01 (-.09,.06)  | .32 (.21,.55)    | -.44 (-1.00, 1.00)  | .01 (-.06,.07)   |
| Environmental concerns               | .41 (.31,.59)    | -1.00 (-1.00, 1.00) | .00 (-.06,.05)   | .37 (.21,.62)     | .23 (-1.00, 1.00)   | .01 (-.08,.11)  | .46 (.29,.76)     | -1.00 (-1.00,1.00) | -.02 (-.09,.06)  | .38 (.38,.60)    | 1.00 (-1.00, 1.00)  | -.01 (-.07,.05)  |
| Religiosity                          | .11 (-.14,.35)   | 1.00 (-1.00, 1.00)  | -.03 (-.09,.04)  | .20 (-.20,.65)    | 1.00 (-1.00, 1.00)  | -.09 (-.19,.01) | .06 (-.25,.36)    | 1.00 (-1.00,1.00)  | .01 (-.07,.09)   | .03 (-.29,.34)   | 1.00 (-1.00, 1.00)  | -.02 (-.09,.04)  |
| Importance of leisure                | .27 (.11,.43)    | 1.00 (-1.00, 1.00)  | -.01 (-.07,.05)  | .23 (-.28,.57)    | 1.00 (-1.00, 1.00)  | -.03 (-.13,.08) | .29 (.29,.48)     | 1.00 (-1.00,1.00)  | .00 (-.08,.08)   | .16 (-.16,.37)   | 1.00 (-1.00, 1.00)  | .00 (-.07,.07)   |
| Alcohol use                          | .19 (.13,.47)    | -1.00 (-1.00, 1.00) | -.05 (-.13,.02)  | .23 (-.31,.98)    | -1.00 (-1.00, 1.00) | -.03 (-.16,.11) | .14 (.14,.49)     | -1.00 (-1.00,1.00) | -.06 (-.15,.03)  | .27 (-.04,.67)   | -1.00 (-1.00, 1.00) | -.07 (-.15,.01)  |
| Ever smoked                          | -.11 (-.23,.04)  | -.94 (-1.00, 1.00)  | .00 (-.07,.06)   | -.06 (-.26,.25)   | -.85 ( NA, 1.00)    | -.04 (-.14,.07) | -.13 (-.35,.02)   | -1.00 (-1.00,1.00) | .01 (-.07,.09)   | -.11 (-.27,-.05) | -1.00 (-1.00, 1.00) | -.01 (-.07,.06)  |
| Ever vaped                           | -.29 (-.53,-.08) | -1.00 (-1.00, 1.00) | .00 (-.06,.06)   | -.22 (-.59,-.20)  | -1.00 ( NA, 1.00)   | -.02 (-.12,.09) | -.36 (-.78,-.26)  | 1.00 (-1.00,1.00)  | .01 (-.07,.09)   | -.25 (-.60,.07)  | -1.00 (-1.00, 1.00) | .00 (-.07,.07)   |
| Cognitive enhancers                  | .06 (-.16,.27)   | 1.00 (-1.00, 1.00)  | -.02 (-.08,.04)  | .10 (-.23,.59)    | .32 (-1.00, 1.00)   | -.02 (-.12,.09) | -.02 (-.41,-.02)  | 1.00 (-1.00,1.00)  | -.01 (-.09,.06)  | -.08 (-.52,.28)  | 1.00 (-1.00, 1.00)  | -.02 (-.08,.05)  |
| Big 5 Agreeableness                  | .07 (-.06,.25)   | .20 (-1.00, 1.00)   | -.03 (-.09,.03)  | .07 (-.17,.43)    | .63 (-1.00, 1.00)   | -.04 (-.14,.06) | .07 (-.11,.38)    | .32 (-1.00,1.00)   | -.03 (-.10,.04)  | .08 (-.08,.32)   | -.82 (-1.00, 1.00)  | -.06 (-.12,.01)  |
| Big 5 Conscientiousness              | .07 (-.06,.19)   | .43 (-1.00, 1.00)   | .10 (.04,.16)    | .02 (-.21,.28)    | -.95 (-1.00, 1.00)  | .09 (-.01,.19)  | .10 (-.09,.28)    | .09 (-1.00,1.00)   | .11 (.03,.18)    | .08 (-.11,.22)   | .81 (-1.00, 1.00)   | .09 (.03,.16)    |
| Big 5 Extraversion                   | .16 (.02,.26)    | .57 (-1.00, 1.00)   | -.04 (-.10,.02)  | .13 (-.13,.31)    | 1.00 (-1.00, 1.00)  | -.05 (-.14,.05) | .19 (.03,.31)     | .99 (-1.00,1.00)   | -.04 (-.11,.04)  | .11 (-.11,.20)   | 1.00 (-1.00, 1.00)  | -.04 (-.10,.03)  |
| Big 5 Neuroticism                    | -.09 (-.30,.08)  | -.93 (-1.00, 1.00)  | -.01 (-.07,.05)  | -.28 (-1.00,-.08) | 1.00 ( NA, 1.00)    | .05 (-.06,.16)  | -.03 (-.25,.18)   | 1.00 (-1.00,1.00)  | -.04 (-.12,.03)  | -.14 (-.50,.12)  | 1.00 (-1.00, 1.00)  | -.01 (-.08,.06)  |
| Big 5 Openness                       | .11 (-.03,.21)   | -.22 (-1.00, 1.00)  | .00 (-.06,.06)   | .09 (-.27,.28)    | .31 (-1.00, 1.00)   | .01 (-.09,.10)  | .12 (-.06,.27)    | .94 (-1.00,1.00)   | .00 (-.08,.07)   | .07 (-.21,.07)   | 1.00 (.87, 1.00)    | .00 (-.07,.06)   |
| Self-control                         | .11 (.00,.25)    | -.97 (-1.00, 1.00)  | .03 (-.03,.09)   | .12 (-.13,.41)    | .69 (-1.00, 1.00)   | .02 (-.08,.12)  | .10 (-.03,.34)    | .56 (-1.00,1.00)   | .03 (-.04,.11)   | .11 (-.03,.41)   | -1.00 ( NA, 1.00)   | .03 (-.04,.09)   |
| Not planning for the future          | -.29 (-.64,-.29) | 1.00 (-1.00, 1.00)  | -.04 (-.10,.02)  | -.27 (-.70,-.07)  | -.99 (-1.00, 1.00)  | -.02 (-.11,.08) | -.37 (-1.00,-.10) | 1.00 (-1.00,1.00)  | -.05 (-.13,.03)  | -.30 (-.71,-.04) | -.91 (-1.00, 1.00)  | -.05 (-.11,.02)  |
| Ambition                             | .25 (.12,.41)    | -.69 (-1.00, 1.00)  | .05 (-.01,.11)   | .34 (.15,.90)     | -1.00 (-1.00, 1.00) | -.02 (-.12,.08) | .20 (-.08,.39)    | 1.00 (-1.00,1.00)  | .09 (.01,.16)    | .25 (.02,.45)    | .74 (-1.00, 1.00)   | .03 (-.03,.10)   |
| Physical activity                    | .22 (.05,.33)    | .34 (-1.00, 1.00)   | -.01 (-.07,.04)  | .24 (.06,.68)     | -.67 (-1.00, 1.00)  | -.08 (-.17,.01) | .13 (-.19,.33)    | 1.00 (-1.00,1.00)  | .04 (-.03,.11)   | .11 (-.18,.32)   | 1.00 (-1.00, 1.00)  | .00 (-.06,.06)   |
| Health behaviours                    | .32 (.27,.47)    | 1.00 (-1.00, 1.00)  | -.04 (-.10,.02)  | .39 (.20,.63)     | .50 (-1.00, 1.00)   | -.06 (-.15,.04) | .27 (.12,.49)     | 1.00 (-1.00,1.00)  | -.03 (-.10,.05)  | .33 (.15,.55)    | 1.00 (-1.00, 1.00)  | -.03 (-.09,.04)  |
| Risk taking behaviour                | .12 (-.01,.25)   | -.69 (-1.00, 1.00)  | -.10 (-.16,-.04) | .11 (.09,.51)     | -1.00 (-1.00, 1.00) | -.11 (-.21,.00) | .17 (-.02,.33)    | -.05 (-1.00,1.00)  | -.10 (-.18,-.02) | .10 (.10,.28)    | 1.00 (-1.00, 1.00)  | -.10 (-.17,-.04) |
| Risky sexual behaviour               | -.11 (-.21,.02)  | -.96 (-1.00, 1.00)  | -.03 (-.08,.03)  | -.10 (-.27,.15)   | -.94 (-1.00, 1.00)  | -.06 (-.16,.04) | -.12 (-.29,-.01)  | -1.00 (-1.00,1.00) | -.01 (-.08,.07)  | -.04 (-.07,.08)  | -1.00 (-1.00, 1.00) | -.03 (-.10,.03)  |
| Media use                            | -.04 (-.13,.05)  | -.77 (-1.00, 1.00)  | -.02 (-.08,.03)  | .03 (-.11,.23)    | .39 (-1.00, 1.00)   | -.03 (-.12,.07) | -.10 (-.26,.03)   | .29 (-1.00,1.00)   | -.02 (-.10,.06)  | -.06 (-.17,.09)  | .95 (-.99, 1.00)    | -.03 (-.09,.04)  |
| Volunteering                         | .25 (.16,.48)    | -.99 (-1.00, 1.00)  | .00 (-.06,.05)   | .25 (.08,.68)     | -.32 (-1.00, 1.00)  | -.06 (-.15,.03) | .26 (.12,.56)     | 1.00 (-1.00,1.00)  | .03 (-.04,.09)   | .32 (.13,.65)    | -1.00 (-1.00, 1.00) | -.01 (-.07,.05)  |

|                                           |                |                    |                |                |                    |                 |                 |                   |                |                 |                     |                |
|-------------------------------------------|----------------|--------------------|----------------|----------------|--------------------|-----------------|-----------------|-------------------|----------------|-----------------|---------------------|----------------|
| Internet dating                           | .03 (-.14,.21) | 1.00 (-1.00, 1.00) | .02 (-.04,.07) | .00 (-.39,.33) | 1.00 (-1.00, 1.00) | -.03 (-.12,.06) | .06 (-.24,.31)  | .70 (-1.00,1.00)  | .04 (-.03,.11) | .01 (-.31,.32)  | -1.00 (-1.00, 1.00) | .01 (-.05,.07) |
| Internet dating                           | .01 (-.15,.18) | .33 ( NA, 1.00)    | .02 (-.04,.07) | .00 (-.30,.42) | -.98 (-1.00, 1.00) | -.03 (-.12,.06) | .03 (-.24,.24)  | -.57 (-1.00,1.00) | .04 (-.03,.11) | .03 (-.03,.35)  | -1.00 (-1.00, 1.00) | .01 (-.06,.07) |
| Financial literacy: knowledge of products | .00 (-.16,.11) | .42 (-1.00, 1.00)  | .03 (-.02,.09) | .06 (-.32,.19) | 1.00 (-1.00, 1.00) | .00 (-.09,.10)  | -.08 (-.33,.10) | 1.00 (-1.00,1.00) | .05 (-.02,.13) | -.02 (-.29,.22) | 1.00 (-1.00, 1.00)  | .04 (-.02,.11) |
| Financial attitudes and behaviour         | .09 (-.06,.22) | .40 (-1.00, 1.00)  | .05 (-.01,.11) | .13 (-.18,.41) | .83 (-1.00, 1.00)  | .03 (-.06,.12)  | .07 (-.15,.25)  | -.64 (-1.00,1.00) | .06 (-.01,.14) | .07 (-.15,.27)  | .90 (-1.00, 1.00)   | .06 (-.00,.12) |

Note. A= genetic influences, C= shared environmental influences, E= unique environmental influences. Scores were corrected for mean age and sex differences (see Methods).

**Table S14.** Univariate GREML estimates

| Trait                               | GREML results      |     |          |      |                    |     |          |      |
|-------------------------------------|--------------------|-----|----------|------|--------------------|-----|----------|------|
|                                     | Family-based       |     |          |      | Unrelated samples  |     |          |      |
|                                     | SNP-h <sup>2</sup> | SE  | LogL     | N    | SNP-h <sup>2</sup> | SE  | LogL     | N    |
| Daily hassles                       | .05                | .07 | -2466.48 | 5115 | .17                | .10 | -1859.61 | 3770 |
| CHAOS                               | .12                | .07 | -271.92  | 5705 | .20                | .09 | -2026.25 | 4099 |
| Childhood experiences               | .15                | .07 | -2372.97 | 5116 | .17                | .10 | -1867.48 | 3777 |
| Poor sleep quality                  | .13                | .07 | -2388.89 | 5026 | .07                | .10 | -1812.23 | 3713 |
| Marriage hopes                      | .03                | .06 | -2784.46 | 5622 | .13                | .09 | -2042.02 | 4069 |
| Marriage worries                    | .10                | .07 | -2798.85 | 5621 | .06                | .09 | -2044.96 | 4068 |
| Quality of relationship with twin   | .11                | .08 | -2522.54 | 5533 | .26                | .09 | -2023.64 | 4026 |
| Quality of relationship with mother | .11                | .07 | -2646.08 | 5484 | .09                | .09 | -1991.28 | 3998 |
| Quality of relationship with father | .10                | .07 | -2473.04 | 5381 | .17                | .09 | -1967.84 | 3937 |
| Number of relationships             | .14                | .07 | -2671.69 | 5620 | .23                | .09 | -1954.13 | 4069 |
| Longest relationship                | .05                | .08 | -2327.97 | 4803 | .05                | .10 | -1803.40 | 3672 |
| Partner violence                    | .10                | .07 | -270.17  | 5453 | .19                | .09 | -203.17  | 3992 |
| Contact with mother                 | .10                | .15 | -113.90  | 2393 | .08                | .18 | -976.90  | 2005 |
| Communication with mother           | .14                | .14 | -1187.64 | 2448 | .11                | .17 | -1035.21 | 2049 |
| Contact with father                 | .00                | .14 | -1166.09 | 2614 | .00                | .17 | -1006.91 | 2135 |
| Communication with father           | -.08               | .12 | -1206.95 | 2835 | .00                | .15 | -1102.89 | 2313 |
| Peer pressure                       | .02                | .06 | -281.79  | 5568 | .00                | .09 | -2081.99 | 4045 |
| Physical peer victimisation         | .06                | .07 | -249.71  | 4966 | .07                | .10 | -1814.18 | 3691 |
| Social peer victimisation           | .17                | .07 | -2462.50 | 4966 | .16                | .10 | -1836.95 | 3691 |
| Verbal peer victimisation           | .14                | .07 | -2556.27 | 4964 | .10                | .10 | -1927.58 | 3690 |



|                                      |     |     |          |      |     |     |          |      |
|--------------------------------------|-----|-----|----------|------|-----|-----|----------|------|
| Cyber peer victimisation             | .16 | .07 | -2488.27 | 4963 | .18 | .10 | -1932.56 | 3689 |
| Physical peer perpetration           | .00 | .07 | -2533.76 | 4965 | .04 | .10 | -1957.28 | 3690 |
| Social peer perpetration             | .12 | .07 | -2313.53 | 4964 | .09 | .10 | -1661.46 | 3689 |
| Verbal peer perpetration             | .00 | .07 | -2566.01 | 4964 | .00 | .10 | -1884.04 | 3689 |
| Cyber peer perpetration              | .16 | .08 | -253.70  | 4964 | .25 | .10 | -199.04  | 3689 |
| Parental role aspirations            | .04 | .07 | -2651.00 | 5121 | .00 | .09 | -1913.54 | 3781 |
| Occupational role aspirations        | .00 | .07 | -2545.07 | 5124 | .00 | .10 | -184.20  | 3782 |
| Homecare role aspirations            | .10 | .07 | -253.68  | 5124 | .13 | .10 | -1841.62 | 3782 |
| Importance of relationships          | .06 | .06 | -2795.22 | 5670 | .08 | .09 | -2006.33 | 4112 |
| Achievement motivation               | .04 | .07 | -2838.80 | 5669 | .12 | .09 | -2037.22 | 4111 |
| Purpose in life                      | .09 | .07 | -2781.45 | 5667 | .14 | .09 | -207.67  | 4110 |
| Importance of democracy and equality | .05 | .07 | -2813.41 | 5657 | .07 | .09 | -2046.04 | 4105 |
| Environmental concerns               | .19 | .07 | -2788.12 | 5663 | .24 | .09 | -2054.45 | 4109 |
| Religiosity                          | .00 | .06 | -215.37  | 5571 | .00 | .09 | -1688.22 | 4047 |
| Importance of leisure                | .20 | .07 | -2463.74 | 5026 | .26 | .10 | -1842.84 | 3714 |
| Alcohol use                          | .01 | .08 | -214.11  | 4635 | .05 | .10 | -1616.28 | 3503 |
| Ever smoked                          | .04 | .07 | -2466.61 | 5043 | .00 | .09 | -1842.05 | 3728 |
| Ever vaped                           | .09 | .07 | -2427.37 | 4985 | .07 | .10 | -1914.77 | 3730 |
| Cognitive enhancers                  | .05 | .07 | -275.32  | 5508 | .08 | .10 | -184.88  | 3703 |
| Big 5 Agreeableness                  | .12 | .08 | -2521.59 | 5040 | .00 | .09 | -1998.17 | 4043 |
| Big 5 Conscientiousness              | .00 | .06 | -2699.13 | 5500 | .01 | .09 | -197.73  | 4038 |

|                                           |                    |     |                    |      |                    |     |                    |      |
|-------------------------------------------|--------------------|-----|--------------------|------|--------------------|-----|--------------------|------|
| Big 5 Extraversion                        | .13                | .07 | -2709.25           | 5528 | .21                | .09 | -1934.41           | 4059 |
| Big 5 Neuroticism                         | .06                | .07 | -2702.47           | 5534 | .05                | .09 | -2005.99           | 4063 |
| Big 5 Openness                            | .16                | .07 | -2723.37           | 5519 | .25                | .09 | -1985.46           | 4053 |
| Self-control                              | .02                | .06 | -2716.50           | 5498 | .00                | .08 | -1944.17           | 4037 |
| Not planning for the future               | .06                | .07 | -2678.72           | 5493 | .19                | .09 | -1946.78           | 4033 |
| Ambition                                  | .03                | .07 | -2572.27           | 5117 | .11                | .10 | -1878.06           | 3771 |
| Physical activity                         | .04                | .07 | -2754.09           | 5548 | .00                | .09 | -2033.70           | 4031 |
| Health behaviours                         | .12                | .07 | -2734.04           | 5571 | .11                | .09 | -2047.28           | 4039 |
| Risk taking behaviour                     | .05                | .07 | -2624.36           | 5493 | .08                | .09 | -1981.79           | 4034 |
| Risky sexual behaviour                    | .17                | .07 | -2606.46           | 5397 | .22                | .09 | -1963.86           | 3955 |
| Media use                                 | .13                | .07 | -2625.49           | 5526 | .04                | .09 | -1957.01           | 4022 |
| Volunteering                              | .06                | .07 | -2737.51           | 5577 | .17                | .09 | -2003.49           | 4050 |
| Internet dating (scale)                   | .03                | .07 | -2711.68           | 5506 | .00                | .09 | -1984.05           | 4013 |
| Internet dating (y/n)                     | .05                | .07 | -2755.54           | 5524 | .00                | .09 | -2009.21           | 4020 |
| Financial literacy: knowledge of products | .15                | .07 | -2647.35           | 5440 | .13                | .09 | -1994.02           | 3988 |
| Financial attitudes and behaviour         | .06                | .07 | -2695.96           | 5439 | .00                | .09 | -1961.40           | 3987 |
|                                           | Family-based       |     |                    |      | Unrelated samples  |     |                    |      |
| Functional outcome                        | SNP-h <sup>2</sup> | SE  | SNP-h <sup>2</sup> | SE   | SNP-h <sup>2</sup> | SE  | SNP-h <sup>2</sup> | SE   |
| Wellbeing factor (1st PC)                 | .04                | .13 | -1359.09           | 2703 | .04                | .13 | -1358.65           | 2701 |
| <i>P</i> factor (1st PC)                  | .20                | .17 | -1097.11           | 2142 | .20                | .17 | -1096.09           | 2139 |
| Health factor (1st PC)                    | .00                | .16 | -1232.74           | 2292 | .00                | .16 | -1232.50           | 2289 |
| Achieved educational level                | .01                | .07 | -2607.07           | 5546 | .09                | .09 | -1979.12           | 4028 |
| Planned educational level                 | .14                | .10 | -1642.97           | 3641 | .24                | .12 | -1409.25           | 2956 |

Note. SE= standard error; LogL= log likelihood; N= sample size.

**Table S15.** Bivariate GREML results.

| Trait                               | Bivariate GREML results |             |          |      |                       |               |          |      |                         |               |          |      |                            |      |          |      |                                                  |       |          |      |
|-------------------------------------|-------------------------|-------------|----------|------|-----------------------|---------------|----------|------|-------------------------|---------------|----------|------|----------------------------|------|----------|------|--------------------------------------------------|-------|----------|------|
|                                     | Unrelated samples       |             |          |      |                       |               |          |      |                         |               |          |      |                            |      |          |      |                                                  |       |          |      |
|                                     | Functional outcomes     |             |          |      |                       |               |          |      |                         |               |          |      |                            |      |          |      |                                                  |       |          |      |
|                                     | Wellbeing               |             |          |      | Adverse mental health |               |          |      | Adverse physical health |               |          |      | Achieved educational level |      |          |      | Planned educational level                        |       |          |      |
|                                     | rG                      | SE          | LogL     | N    | rG                    | SE            | LogL     | N    | rG                      | SE            | LogL     | N    | rG                         | SE   | LogL     | N    | rG                                               | SE    | LogL     | N    |
| Daily hassles                       | -1.00                   | 0.56        | -2739.61 | 5716 | 1.00                  | 0.67          | -2377.47 | 5304 | 1.00                    | 0.97          | -2691.59 | 5422 | -0.30                      | 0.67 | -3739.67 | 7627 | -0.74                                            | 0.52  | -3070.06 | 6363 |
| CHAOS                               | 0.11                    | 0.57        | -2883.73 | 6019 | -0.97                 | 1.47          | -2687.30 | 5593 | -0.06                   | 0.59          | -2865.27 | 5709 | 0.35                       | 0.56 | -3961.66 | 8083 | -0.50                                            | 0.40  | -3250.38 | 6725 |
| Childhood experiences               | 0.54                    | 0.57        | -2767.14 | 5715 | -1.00                 | 7.05          | -2554.95 | 5306 | -1.00                   | 4.17          | -2716.06 | 5422 | -0.71                      | 0.59 | -3744.28 | 7630 | -0.52                                            | 0.45  | -3080.20 | 6366 |
| Poor sleep quality                  | 0.37                    | 0.77        | -2744.32 | 5666 | 1.00                  | 0.99          | -2361.02 | 5254 | -0.25                   | 1.97          | -2573.29 | 5374 | 1.00                       | 1.18 | -3693.22 | 7560 | -0.73                                            | 0.78  | -3024.94 | 6301 |
| Marriage hopes                      | 0.71                    | 0.54        | -2964.66 | 5998 | -0.72                 | 0.89          | -2810.50 | 5568 | 0.18                    | 0.97          | -2931.40 | 5684 | -0.44                      | 0.69 | -3997.05 | 8079 | -0.20                                            | 0.48  | -3275.37 | 6710 |
| Marriage worries                    | -1.00                   | 2.66        | -2909.27 | 5997 | 0.17                  | 0.98          | -2776.09 | 5567 | -1.00                   | 2.63          | -2928.96 | 5683 | 1.00                       | 2.98 | -4034.90 | 8078 | 1.00                                             | 1.26  | -3281.90 | 6709 |
| Quality of relationship with twin   | -0.27                   | 0.38        | -2955.23 | 5959 | 0.28                  | 0.68          | -2781.59 | 5530 | -0.88                   | 1.22          | -2914.63 | 5647 | -0.26                      | 0.48 | -3984.54 | 8026 | -0.17                                            | 0.34  | -3266.47 | 6676 |
| Quality of relationship with mother | -0.13                   | 0.66        | -2910.16 | 5928 | 0.50                  | 1.43          | -2726.78 | 5500 | 1.00                    | 2.57          | -2881.56 | 5617 | -0.56                      | 0.87 | -3947.93 | 7988 | 0.05                                             | 0.60  | -3227.53 | 6641 |
| Quality of relationship with father | 0.22                    | 0.61        | -2859.19 | 5865 | 0.26                  | 1.70          | -2677.81 | 5433 | 0.09                    | 1.72          | -2850.92 | 5549 | 0.54                       | 0.57 | -3900.40 | 7912 | 0.36                                             | 0.40  | -3199.09 | 6575 |
| Number of relationships             | 0.16                    | 0.40        | -2898.47 | 5997 | -0.02                 | 0.55          | -2716.90 | 5567 | 0.51                    | 1.89          | -2819.90 | 5683 | -1.00                      | 0.81 | -3926.55 | 8078 | -0.46                                            | 0.36  | -3189.10 | 6709 |
| Longest relationship                | -0.18                   | 0.96        | -2748.72 | 5653 | 0.61                  | 1.41          | -2598.08 | 5215 | -0.43                   | 1.62          | -2708.37 | 5329 | -1.00                      | 1.10 | -3668.39 | 7494 | -0.71                                            | 0.88  | -3008.86 | 6242 |
| Partner violence                    | 0.07                    | 0.49        | -2927.00 | 5927 | 0.98                  | 0.76          | -2713.74 | 5494 | 1.00                    | 80.06         | -2885.35 | 5606 | -0.35                      | 0.54 | -3951.16 | 7960 | -0.54                                            | 0.44  | -3262.48 | 6631 |
| Contact with mother                 | 1.00                    | 1.87        | -2093.93 | 4241 | 1.00                  | 1.96          | -1861.14 | 3744 | 1.00                    | 12.92         | -2013.62 | 3880 | -1.00                      | 1.98 | -2779.81 | 5736 | -0.26                                            | 0.73  | -2203.06 | 4661 |
| Communication with mother           | 1.00                    | 0.97        | -2119.14 | 4276 | -0.71                 | 1.41          | -1888.19 | 3780 | 1.00                    | 10.19         | -2035.48 | 3915 | -0.83                      | 0.92 | -2849.76 | 5775 | -0.67                                            | 0.84  | -2276.94 | 4702 |
| Contact with father                 | 1.00                    | 2.84        | -2115.33 | 4358 | 1.00                  | 23.22         | -1895.94 | 3874 | -1.00                   | 1653<br>26.26 | -2045.25 | 4005 | -1.00                      | 5.45 | -2820.35 | 5882 | -1.00                                            | 97.77 | -2240.86 | 4783 |
| Communication with father           | 1.00                    | 2246.<br>15 | -2199.38 | 4506 | 1.00                  | 1969<br>32.82 | -1988.65 | 4029 | -1.00                   | 1444<br>47.49 | -2137.22 | 4158 | 1.00                       | 3.60 | -2949.42 | 6052 | log likelihood not covered within 100 iterations |       |          |      |

|                                      |       |       |          |      |       |       |          |      |       |               |          |      |                                                  |             |          |      |       |       |          |      |
|--------------------------------------|-------|-------|----------|------|-------|-------|----------|------|-------|---------------|----------|------|--------------------------------------------------|-------------|----------|------|-------|-------|----------|------|
| Peer pressure                        | 1.00  | 2.07  | -2983.73 | 5973 | -1.00 | 7.95  | -2787.55 | 5550 | -1.00 | 1685<br>29.38 | -2993.24 | 5659 | 1.00                                             | 29.00       | -4041.78 | 8033 | -1.00 | 7.27  | -3315.26 | 6678 |
| Physical peer victimisation          | 1.00  | 1.13  | -2771.77 | 5647 | -1.00 | 2.29  | -2590.71 | 5230 | 0.18  | 9.80          | -2733.65 | 5351 | -0.02                                            | 0.84        | -3699.18 | 7532 | 0.26  | 0.68  | -3042.70 | 6276 |
| Social peer victimisation            | 0.28  | 0.60  | -2777.15 | 5647 | 0.99  | 0.44  | -2487.26 | 5230 | 0.58  | 0.87          | -2713.35 | 5351 | -0.23                                            | 0.57        | -3740.31 | 7532 | -0.19 | 0.44  | -3073.28 | 6276 |
| Verbal peer victimisation            | 0.59  | 0.82  | -2864.08 | 5645 | 1.00  | 0.91  | -2589.89 | 5228 | 0.96  | 1.20          | -2783.10 | 5349 | -0.22                                            | 0.78        | -3811.11 | 7532 | -0.48 | 0.76  | -3154.33 | 6276 |
| Cyber peer victimisation             | 0.16  | 0.48  | -2869.82 | 5645 | 0.82  | 0.69  | -2607.49 | 5228 | 0.92  | 1.86          | -2795.31 | 5349 | -0.22                                            | 0.56        | -3820.62 | 7530 | -0.18 | 0.41  | -3158.93 | 6274 |
| Physical peer perpetration           | 0.66  | 1.23  | -2914.01 | 5645 | -1.00 | 2.29  | -2742.51 | 5228 | -1.00 | 2.12          | -2872.98 | 5349 | -0.22                                            | 1.64        | -3822.19 | 7532 | 0.57  | 2.35  | -3181.46 | 6276 |
| Social peer perpetration             | -0.02 | 0.58  | -2621.86 | 5644 | 0.73  | 0.95  | -2380.97 | 5227 | -0.14 | 1.26          | -2552.32 | 5348 | -0.26                                            | 0.77        | -3534.56 | 7531 | -0.44 | 0.57  | -2901.04 | 6275 |
| Verbal peer perpetration             | -1.00 | 77.84 | -2842.33 | 5644 | 1.00  | 4.36  | -2647.52 | 5227 | 1.00  | 5.13          | -2790.79 | 5348 | -1.00                                            | 29.27       | -3756.96 | 7531 | -1.00 | 3.46  | -3101.43 | 6275 |
| Cyber peer perpetration              | -0.34 | 0.35  | -2945.86 | 5644 | -0.08 | 0.50  | -2755.48 | 5227 | -0.51 | 1.20          | -2881.45 | 5348 | log likelihood not covered within 100 iterations |             |          |      | 0.27  | 0.39  | -3202.89 | 6275 |
| Parental role aspirations            | 1.00  | 1.35  | -2863.25 | 5720 | 1.00  | 31.18 | -2691.70 | 5311 | 1.00  | 4.09          | -2824.22 | 5427 | 0.02                                             | 0.45        | -3850.10 | 7531 | -1.00 | 12.41 | -3141.58 | 6370 |
| Occupational role aspirations        | 1.00  | 39.19 | -2793.30 | 5721 | 1.00  | 3.29  | -2620.99 | 5312 | 1.00  | 4.27          | -2744.90 | 5428 | -1.00                                            | 1689.<br>99 | -3679.48 | 7635 | -1.00 | 12.59 | -3031.71 | 6372 |
| Homecare role aspirations            | 1.00  | 0.62  | -2767.82 | 5721 | 0.44  | 1.02  | -2618.23 | 5312 | -0.05 | 1.08          | -2745.04 | 5428 | -1.00                                            | 1.23        | -3749.80 | 7635 | -0.74 | 0.57  | -3053.08 | 6372 |
| Importance of relationships          | 0.47  | 0.72  | -2927.17 | 6039 | 0.85  | 1.52  | -2771.22 | 5611 | 1.00  | 507.7<br>3    | -2898.97 | 5726 | -0.25                                            | 0.79        | -3951.54 | 8100 | -0.51 | 0.59  | -3236.35 | 6741 |
| Achievement motivation               | 0.90  | 0.67  | -2977.52 | 6038 | 0.08  | 0.77  | -2809.41 | 5610 | -1.00 | 4.72          | -2941.90 | 5725 | -0.06                                            | 0.64        | -3980.46 | 8099 | 0.80  | 0.62  | -3265.01 | 6740 |
| Purpose in life                      | 0.66  | 0.36  | -2820.97 | 6038 | -0.31 | 0.71  | -2546.39 | 5610 | 1.00  | 28.93         | -2901.23 | 5725 | -0.93                                            | 0.83        | -4009.97 | 8099 | -0.35 | 0.44  | -3289.64 | 6739 |
| Importance of democracy and equality | -1.00 | 1.02  | -2993.78 | 6034 | 0.77  | 1.35  | -2816.62 | 5605 | 1.00  | 10.70         | -2942.61 | 5720 | 1.00                                             | 1.05        | -3949.76 | 8096 | -0.10 | 0.73  | -3259.52 | 6735 |
| Environmental concerns               | -0.22 | 0.40  | -3004.03 | 6038 | 0.58  | 0.72  | -2827.32 | 5609 | 1.00  | 12.04         | -2945.20 | 5724 | 0.81                                             | 0.49        | -3932.61 | 8100 | 0.42  | 0.33  | -3243.83 | 6739 |
| Religiosity                          | 1.00  | 21.11 | -2641.02 | 5975 | 1.00  | 1.91  | -2466.99 | 5552 | 1.00  | 11.70         | -2601.55 | 5661 | -1.00                                            | 5.28        | -3646.42 | 8035 | -1.00 | 77.02 | -2921.66 | 6679 |
| Importance of leisure                | 0.56  | 0.29  | -2712.01 | 5665 | -0.27 | 0.43  | -2472.71 | 5255 | -0.13 | 1.45          | -2714.58 | 5371 | 0.61                                             | 0.50        | -3686.71 | 7564 | 0.24  | 0.33  | -3037.22 | 6299 |
| Alcohol use                          | 0.93  | 3.45  | -2577.93 | 5473 | 1.00  | 9.21  | -2404.25 | 5049 | -1.00 | 104.9<br>6    | -2611.44 | 5168 | 1.00                                             | 4.52        | -3499.60 | 7274 | 1.00  | 0.96  | -2844.07 | 6082 |
| Ever smoked                          | 1.00  | 2.09  | -2804.21 | 5680 | 1.00  | 3.72  | -2616.19 | 5264 | 1.00  | 14.62         | -2748.28 | 5383 | -1.00                                            | 15.28       | -3725.30 | 7578 | 1.00  | 1.65  | -3068.14 | 6322 |

|                                           |                                                  |              |          |      |                                                    |       |          |      |       |       |          |      |                                                    |       |          |      |       |       |          |      |
|-------------------------------------------|--------------------------------------------------|--------------|----------|------|----------------------------------------------------|-------|----------|------|-------|-------|----------|------|----------------------------------------------------|-------|----------|------|-------|-------|----------|------|
| Ever vaped                                | -1.00                                            | 1.63         | -2871.76 | 5690 | 1.00                                               | 2.29  | -2710.45 | 5274 | 1.00  | 4.84  | -2804.16 | 5393 | -0.06                                              | 1.28  | -3758.01 | 7572 | 0.07  | 0.79  | -3119.27 | 6324 |
| Cognitive enhancers                       | -0.11                                            | 0.61         | -2759.04 | 5666 | -0.14                                              | 1.88  | -2592.03 | 5248 | -1.00 | 9.05  | -2775.75 | 5372 | 1.00                                               | 1.59  | -3691.31 | 7542 | 1.00  | 0.76  | -3041.72 | 6295 |
| Big 5 Agreeableness                       | -1.00                                            | 2.52         | -2935.80 | 5970 | 1.00                                               | 6.11  | -2775.80 | 5563 | -1.00 | 2.97  | -2856.83 | 5652 | -1.00                                              | 68.46 | -3903.77 | 7955 | -1.00 | 2.72  | -3214.46 | 6639 |
| Big 5 Conscientiousness                   | 1.00                                             | 9.89         | -2867.58 | 5965 | -1.00                                              | 1.50  | -2685.41 | 5558 | -1.00 | 3.67  | -2810.44 | 5647 | -1.00                                              | 3.32  | -3885.34 | 7951 | -1.00 | 3.46  | -3180.01 | 6635 |
| Big 5 Extraversion                        | 0.56                                             | 0.36         | -2820.79 | 5985 | -0.11                                              | 0.37  | -2554.72 | 5578 | -0.38 | 0.50  | -2771.96 | 5667 | -0.12                                              | 0.53  | -3827.90 | 7968 | 0.24  | 0.41  | -3143.91 | 6653 |
| Big 5 Neuroticism                         | -1.00                                            | 0.78         | -2825.00 | 5989 | 0.45                                               | 0.75  | -2385.10 | 5582 | 0.12  | 0.76  | -2787.52 | 5671 | 1.00                                               | 1.17  | -3921.39 | 7972 | -0.35 | 0.77  | -3218.88 | 6657 |
| Big 5 Openness                            | -0.76                                            | 0.56         | -2901.21 | 5980 | log likelihood not converged within 100 iterations |       |          |      | 0.78  | 0.94  | -2847.25 | 5662 | -0.17                                              | 0.46  | -3878.40 | 7965 | -0.18 | 0.36  | -3194.44 | 6649 |
| Self-control                              | 1.00                                             | 1.89         | -2827.77 | 5965 | 1.00                                               | 2.94  | -2863.70 | 5573 | -1.00 | 4.68  | -2751.14 | 5647 | log likelihood not converged within 100 iterations |       |          |      | 1.00  | 1.58  | -3163.83 | 6635 |
| Not planning for the future               | -0.46                                            | 0.47         | -2883.81 | 5961 | -0.15                                              | 0.59  | -2717.18 | 5554 | 0.15  | 0.79  | -2808.27 | 5643 | 0.06                                               | 0.53  | -3847.91 | 7947 | -0.38 | 0.42  | -3144.80 | 6631 |
| Ambition                                  | 0.26                                             | 0.52         | -2826.34 | 5716 | 0.38                                               | 0.96  | -2646.17 | 5305 | 1.00  | 2.04  | -2785.65 | 5423 | -0.39                                              | 0.82  | -3743.28 | 7627 | 0.12  | 0.52  | -3079.21 | 6363 |
| Physical activity                         | -1.00                                            | 2170<br>4.16 | -2965.28 | 5969 | -1.00                                              | 40.67 | -2796.81 | 5536 | 1.00  | 4.28  | -2919.23 | 5654 | 1.00                                               | 3.23  | -3979.40 | 8046 | 1.00  | 1.91  | -3263.78 | 6676 |
| Health behaviours                         | 0.58                                             | 0.63         | -2986.72 | 5975 | 0.54                                               | 0.92  | -2796.89 | 5544 | 1.00  | 2.06  | -2927.93 | 5661 | 1.00                                               | 0.80  | -3956.02 | 8061 | 1.00  | 0.77  | -3268.17 | 6688 |
| Risk taking behaviour                     | -0.79                                            | 0.85         | -2927.31 | 5962 | 1.00                                               | 1.58  | -2763.49 | 5556 | 1.00  | 3.99  | -2832.55 | 5645 | 1.00                                               | 1.10  | -3889.60 | 7949 | 1.00  | 0.95  | -3195.08 | 6633 |
| Risky sexual behaviour                    | 0.84                                             | 0.55         | -2905.21 | 5877 | 0.28                                               | 0.57  | -2732.49 | 5452 | 0.16  | 0.71  | -2839.28 | 5566 | -0.88                                              | 0.69  | -3894.04 | 7915 | -0.43 | 0.39  | -3181.54 | 6578 |
| Media use                                 | 0.59                                             | 1.24         | -2911.32 | 5963 | 1.00                                               | 1.58  | -2729.35 | 5527 | 1.00  | 10.49 | -2865.00 | 5643 | -1.00                                              | 1.69  | -3920.59 | 8033 | -1.00 | 1.16  | -3181.49 | 6667 |
| Volunteering                              | -0.75                                            | 0.55         | -2951.22 | 5977 | 1.00                                               | 0.81  | -2779.68 | 5554 | 1.00  | 3.42  | -2925.94 | 5664 | 0.56                                               | 0.53  | -3937.45 | 8038 | 0.35  | 0.41  | -3230.69 | 6682 |
| Internet dating (scale)                   | log likelihood not covered within 100 iterations |              |          |      | 1.00                                               | 2.11  | -2759.40 | 5515 | 1.00  | 3.46  | -2875.94 | 5632 | -1.00                                              | 4.51  | -3939.61 | 8020 | 1.00  | 12.65 | -3220.52 | 6660 |
| Internet dating (y/n)                     | -1.00                                            | 6.57         | -2909.25 | 5951 | 1.00                                               | 2.08  | -2782.50 | 5523 | 1.00  | 3.59  | -2901.16 | 5640 | -1.00                                              | 9.03  | -3971.54 | 8031 | 1.00  | 39.67 | -3246.58 | 6667 |
| Financial literacy: knowledge of products | -0.59                                            | 0.96         | -2903.79 | 5948 | -0.22                                              | 0.64  | -2754.70 | 5492 | -0.36 | 1.12  | -2890.28 | 5605 | -0.14                                              | 0.58  | -3951.91 | 7971 | 0.14  | 0.47  | -3228.68 | 6623 |
| Financial attitudes and behaviour         | -1.00                                            | 78.76        | -2808.21 | 5948 | 1.00                                               | 11.21 | -2705.62 | 5492 | -1.00 | 7.74  | -2844.70 | 5605 | log likelihood not converged within 100 iterations |       |          |      | 1.00  | 8.13  | -3187.73 | 6621 |

Note. SE= standard error; LogL= log likelihood; N= sample size.

Supplementary Figures

Figure S1. The Bivariate Cholesky Decomposition.

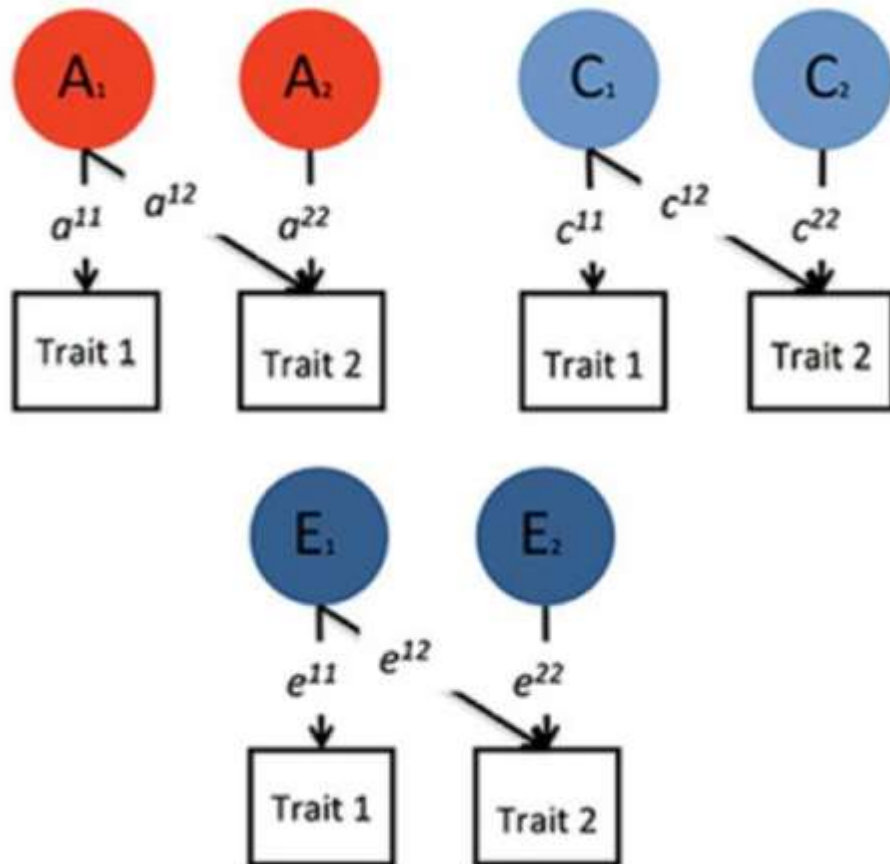

**Figure S2.** Phenotypic correlations between key outcomes and emerging adulthood variables (indicated by the total length of the bar); bivariate genetic estimates for additive genetic (A), shared environmental (C) and non-shared environmental (E) contributions to these correlations for males (a), females (b) and when excluding DZ opposite sex twin pairs (c).

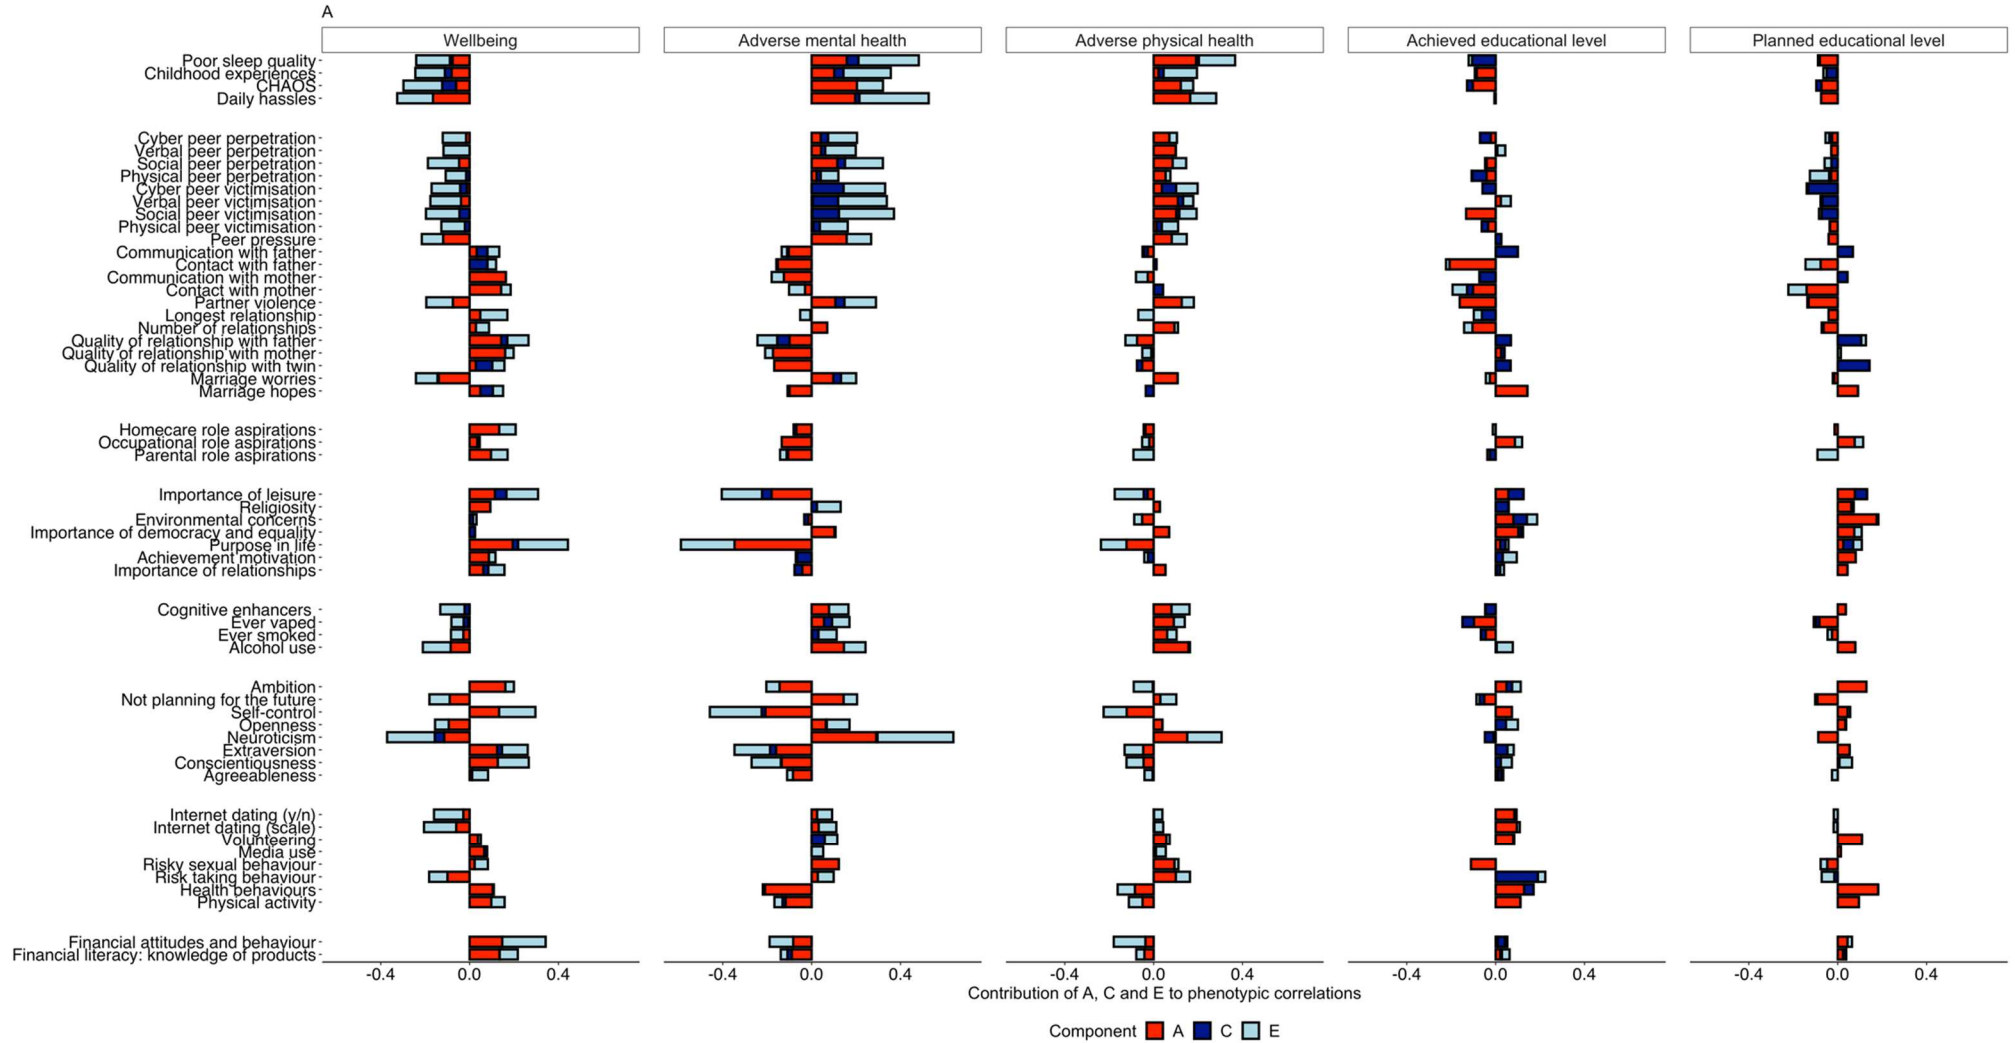

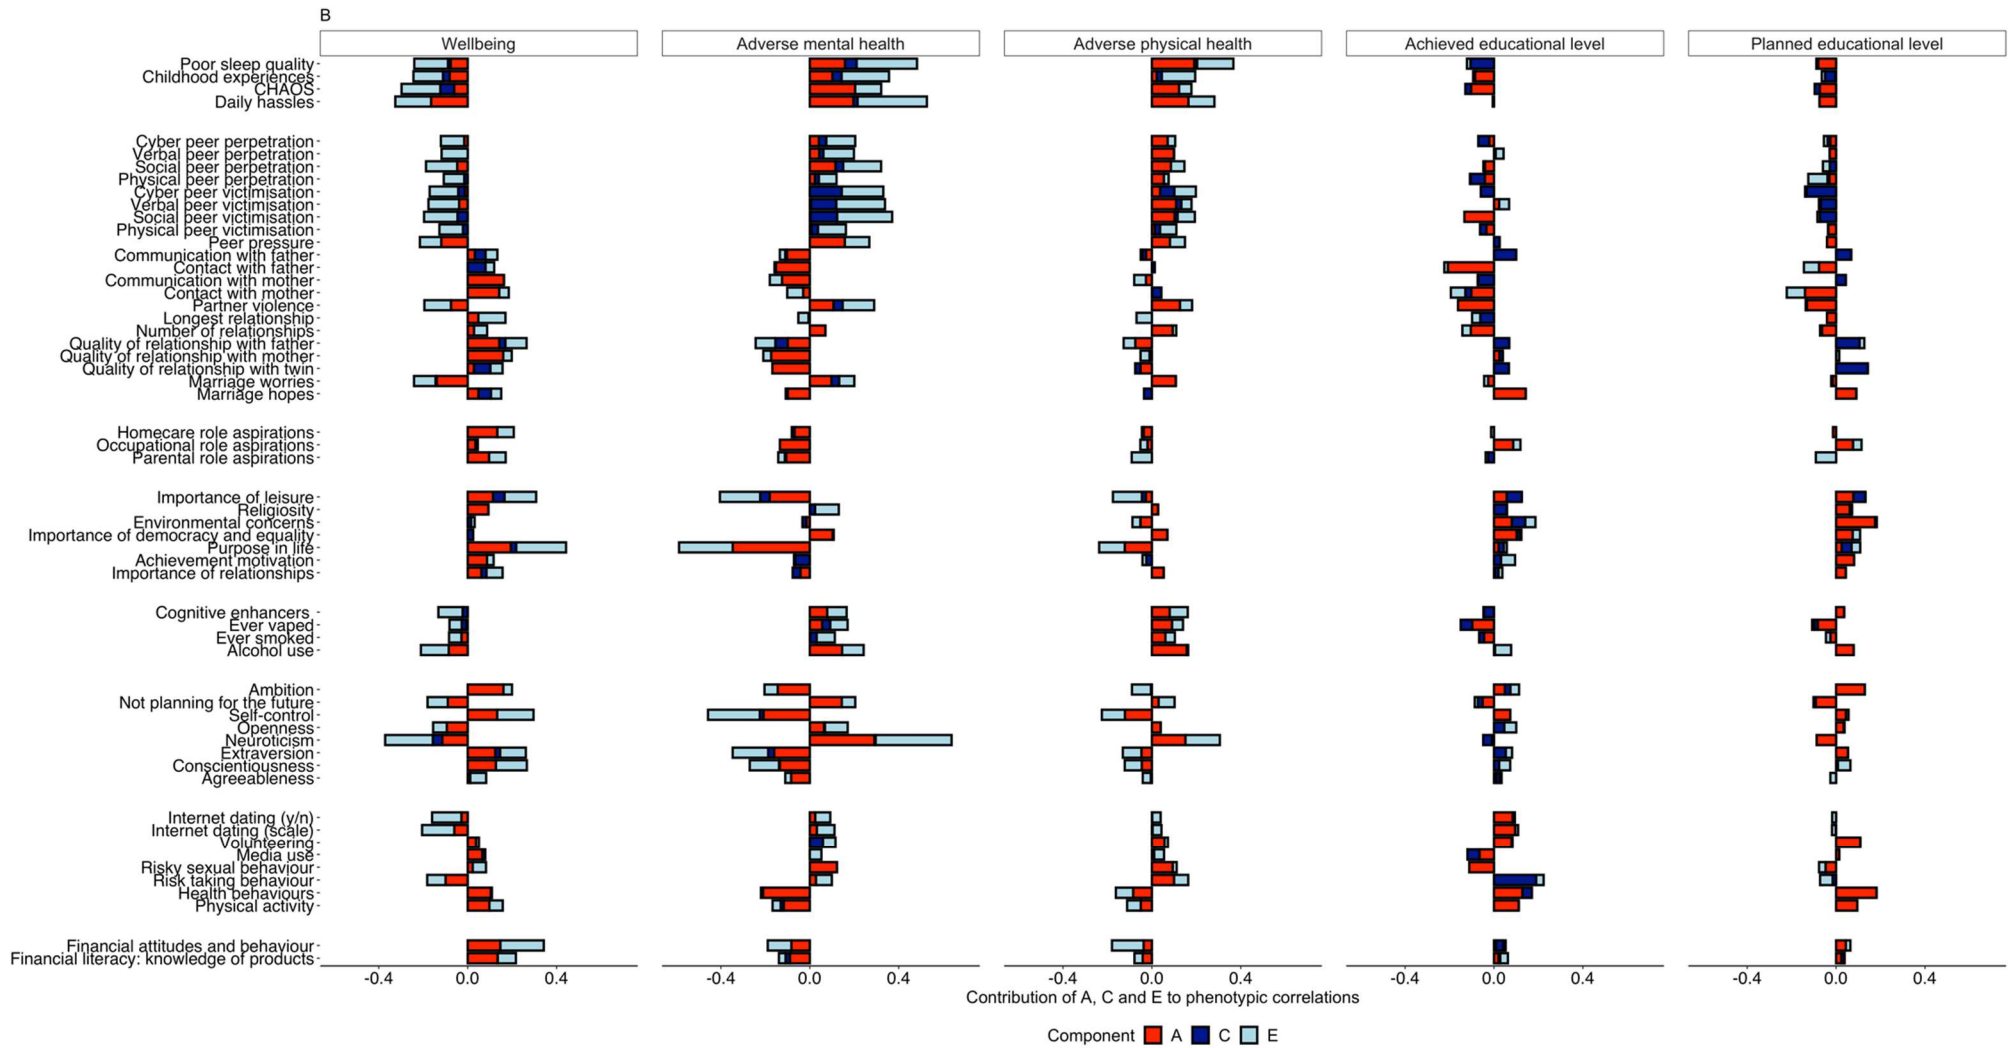



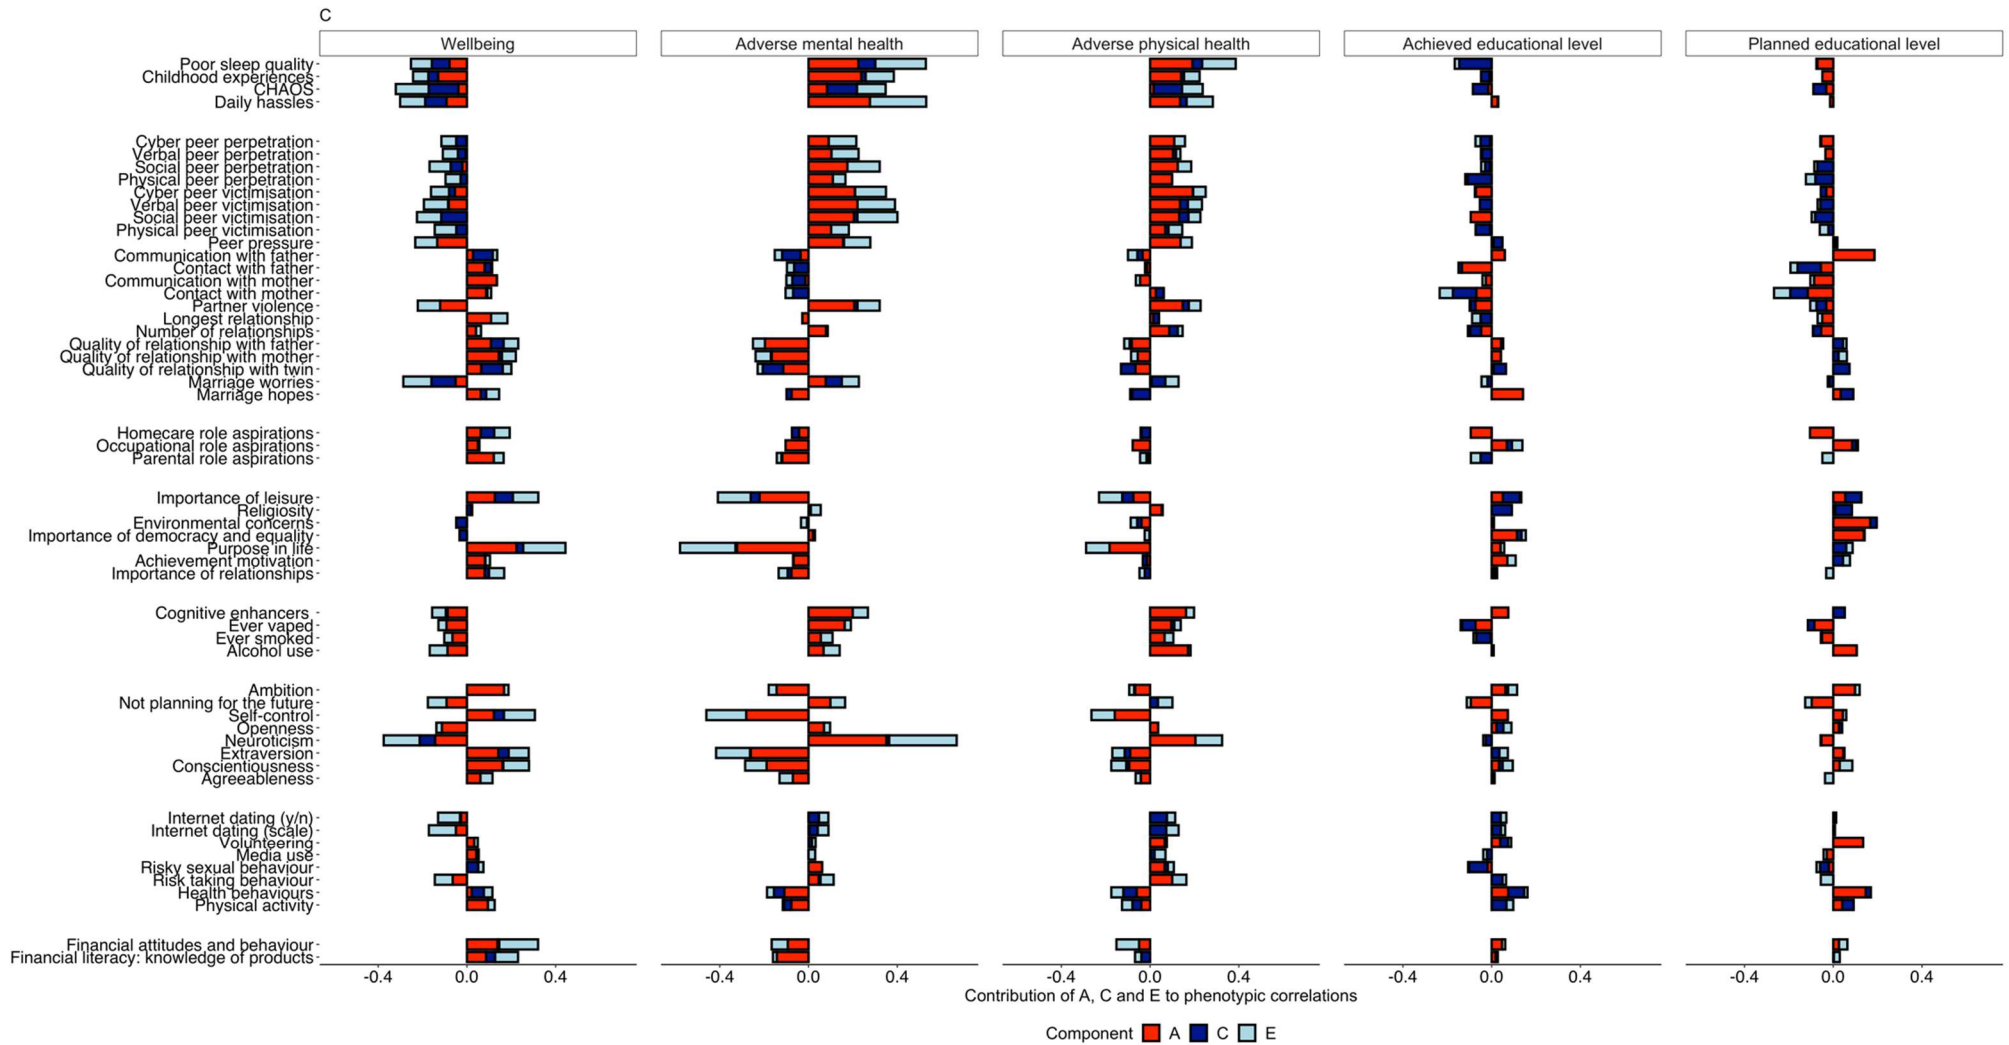

**Figure S3.** Twin correlations for psychological and behavioural traits and key functional outcomes for the whole sample.

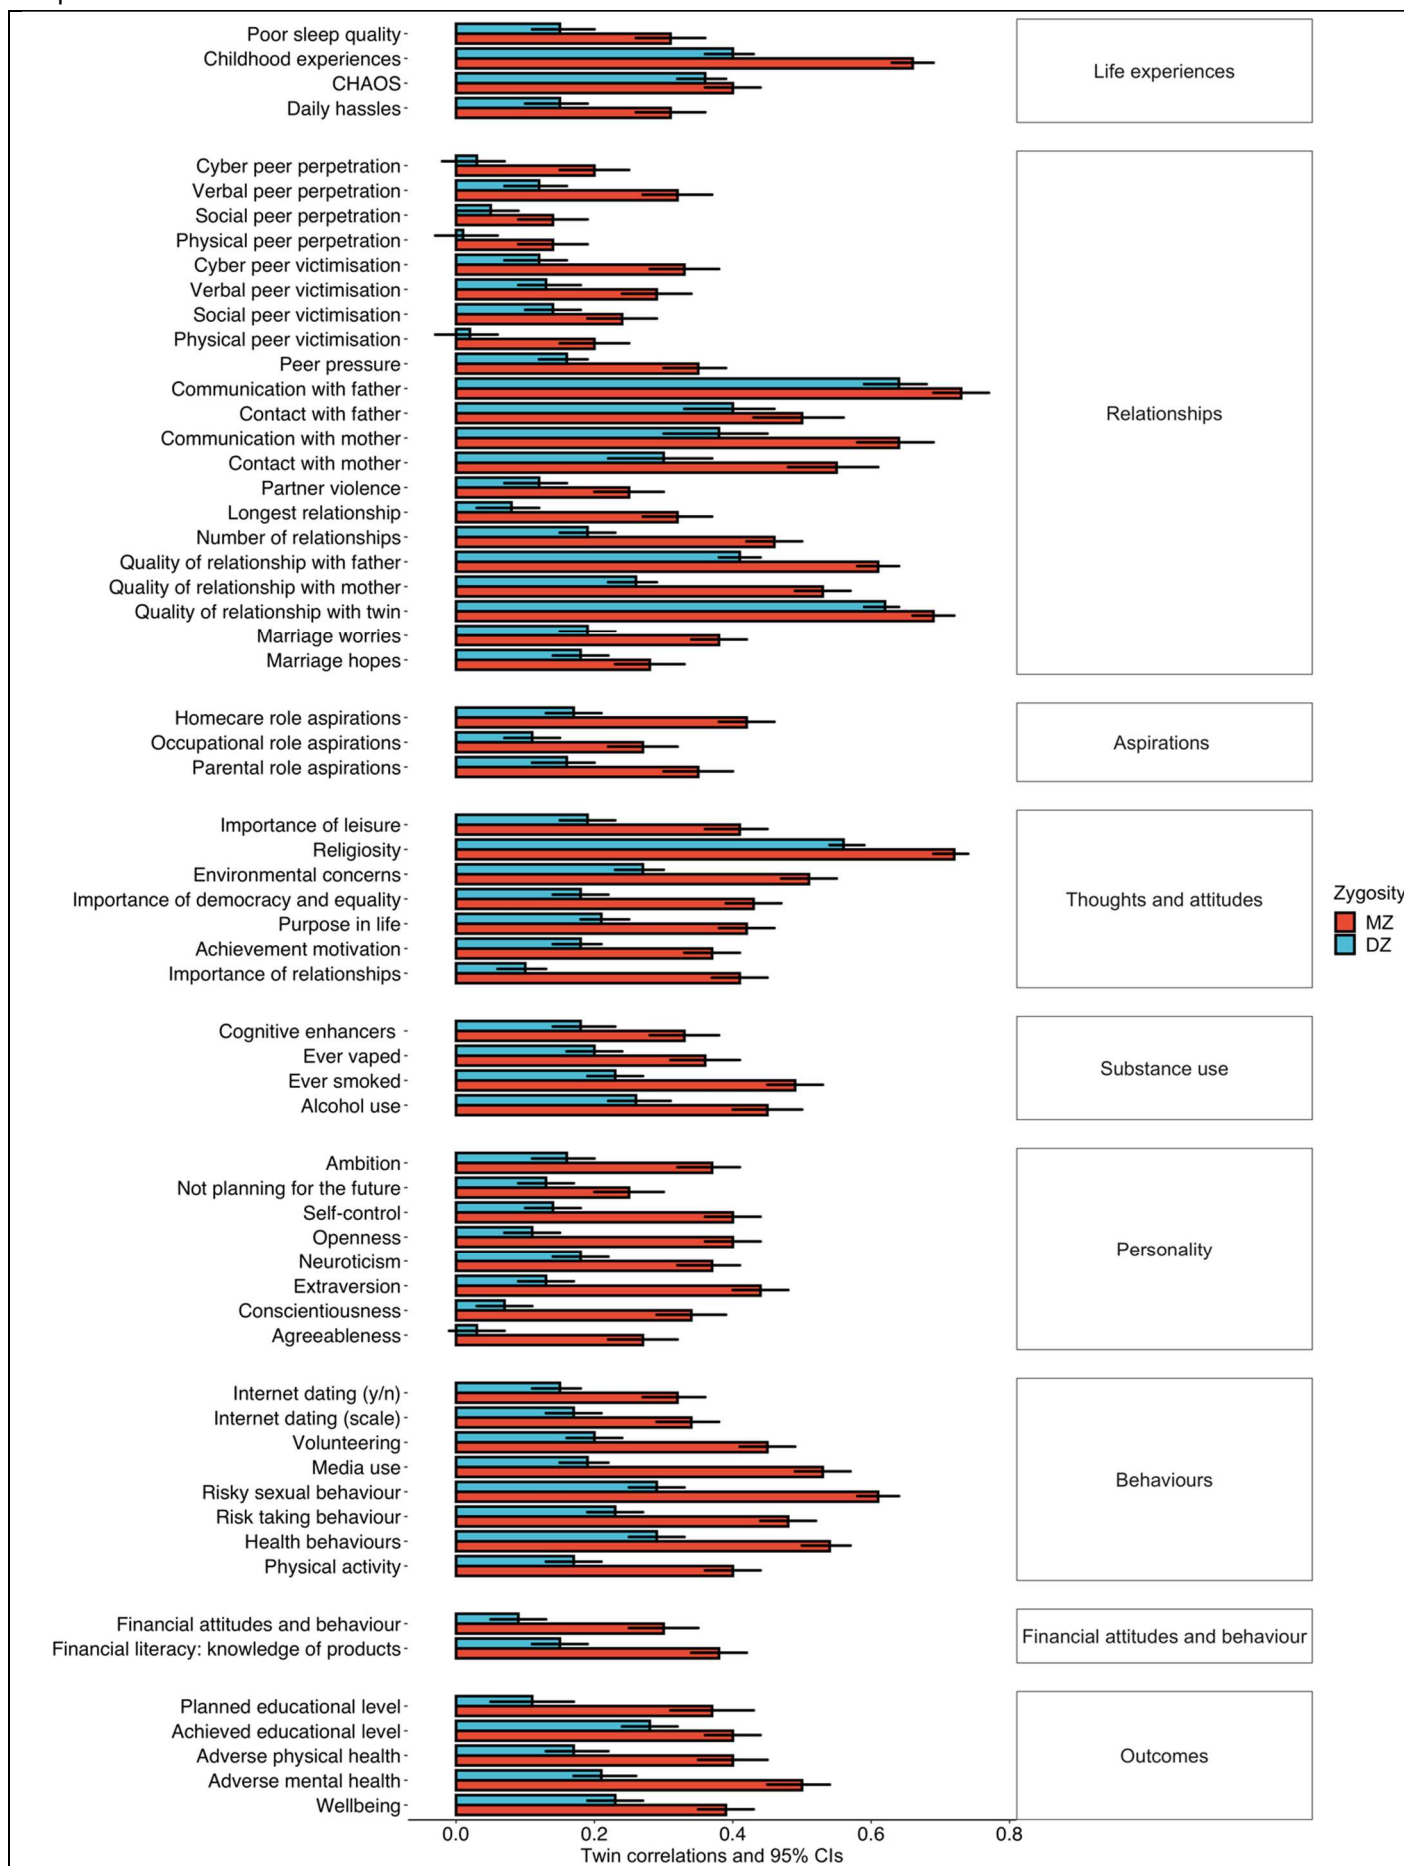

**Figure S4.** Univariate analyses of additive genetic (A), shared environmental (C), and non-shared environmental (E) components of variance for variables for psychological traits and functional outcomes for when calculated for males and females separately (a) and for the whole sample when opposite sex DZ twin pairs were excluded (b).

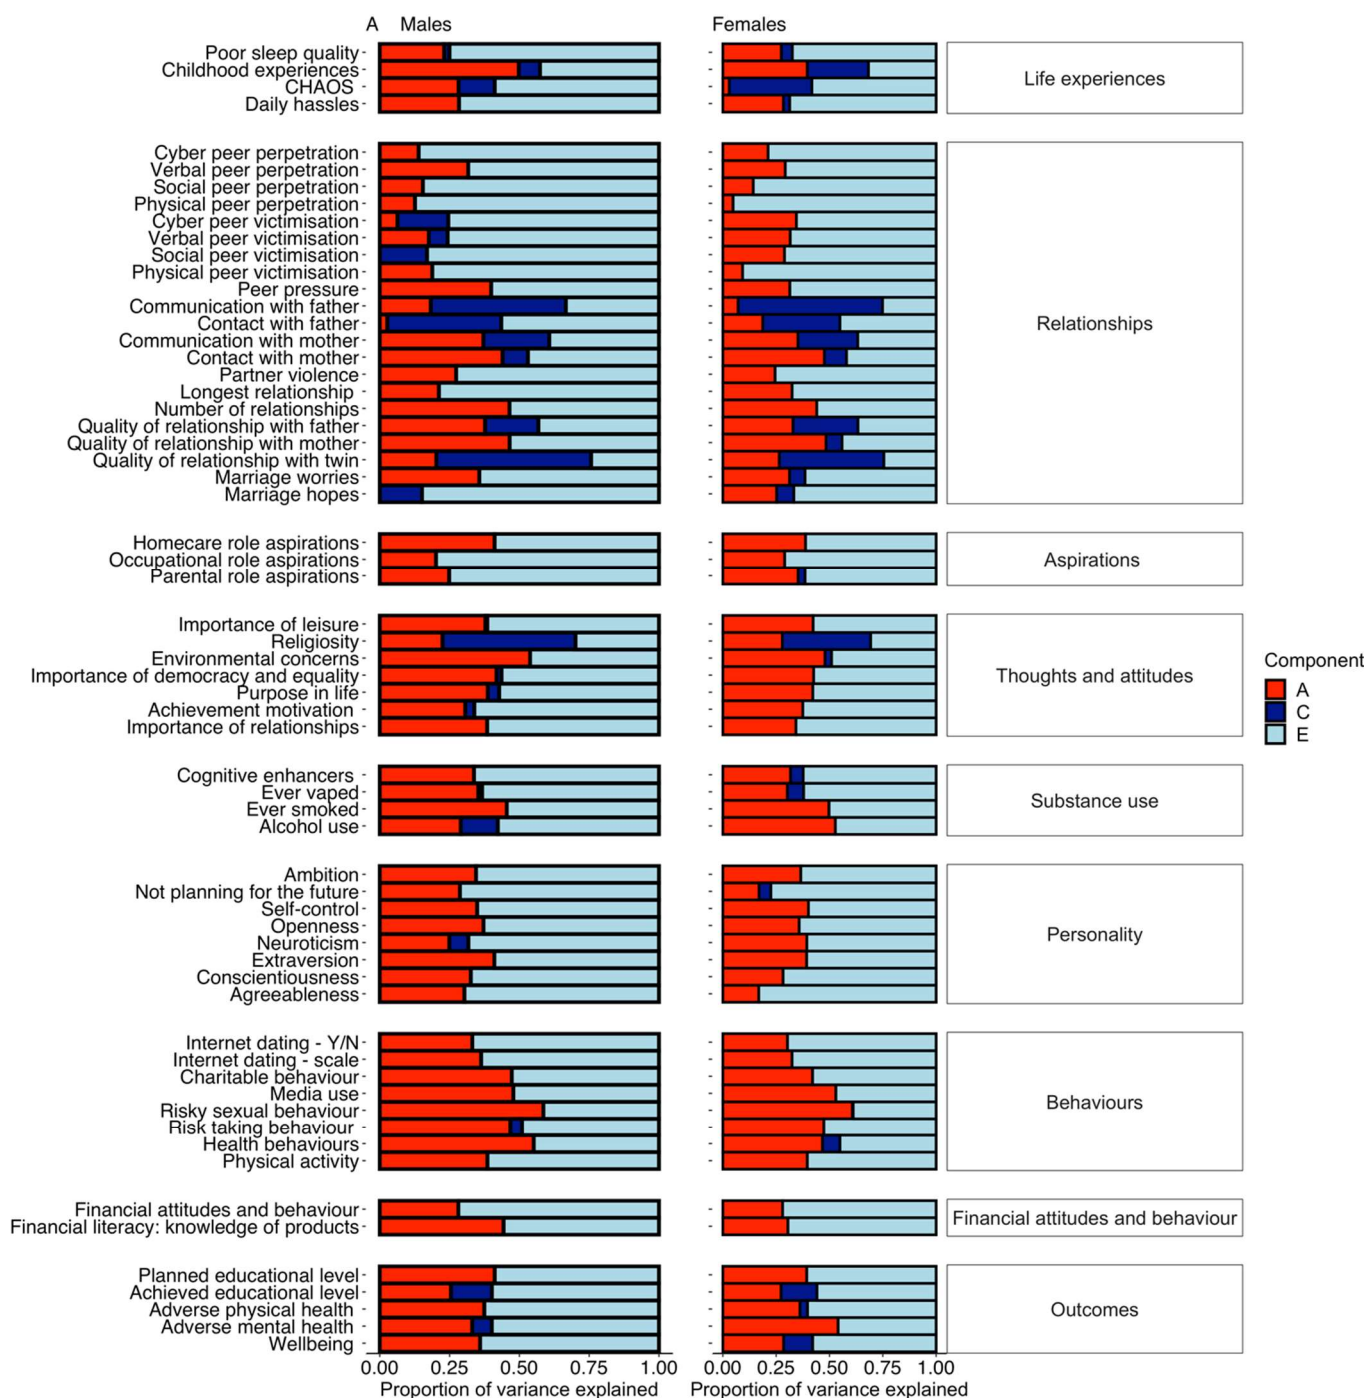

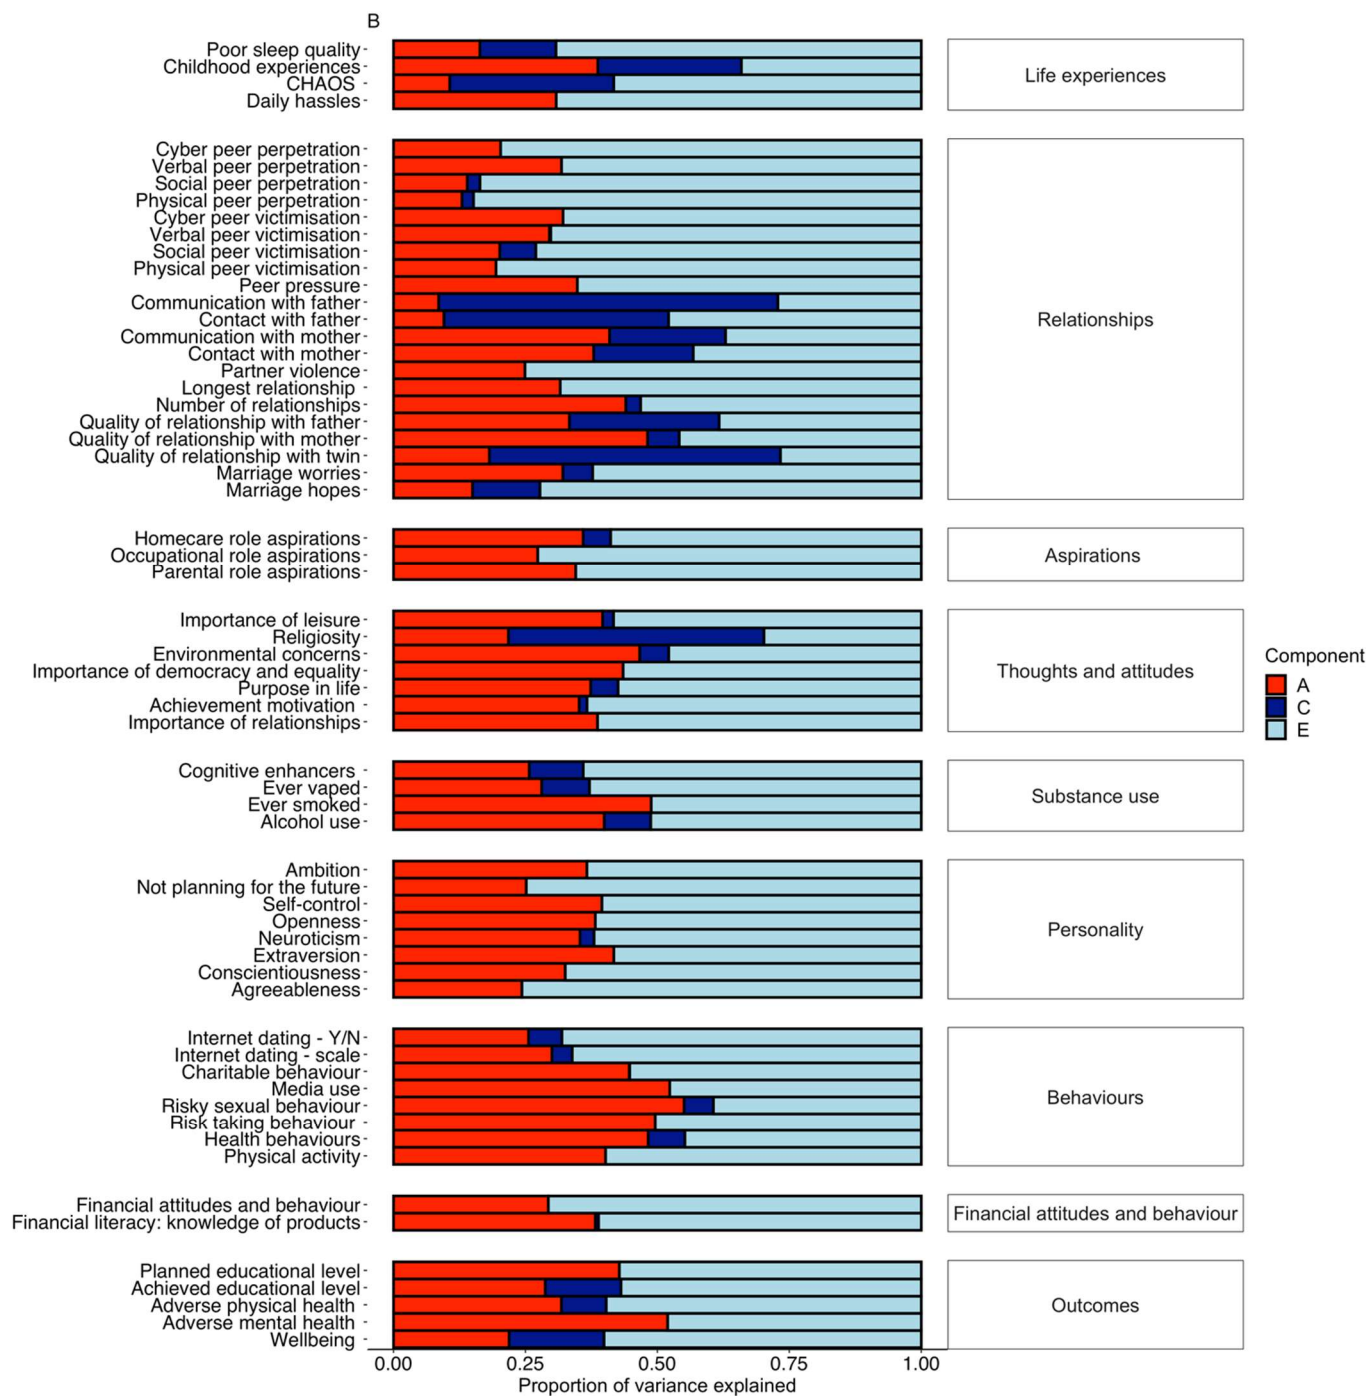

**Figure S5.** Genetic correlations between psychological and behavioural traits and key functional outcomes for the males (a), females (b) and for the whole sample when opposite sex DZ twin were excluded (c)

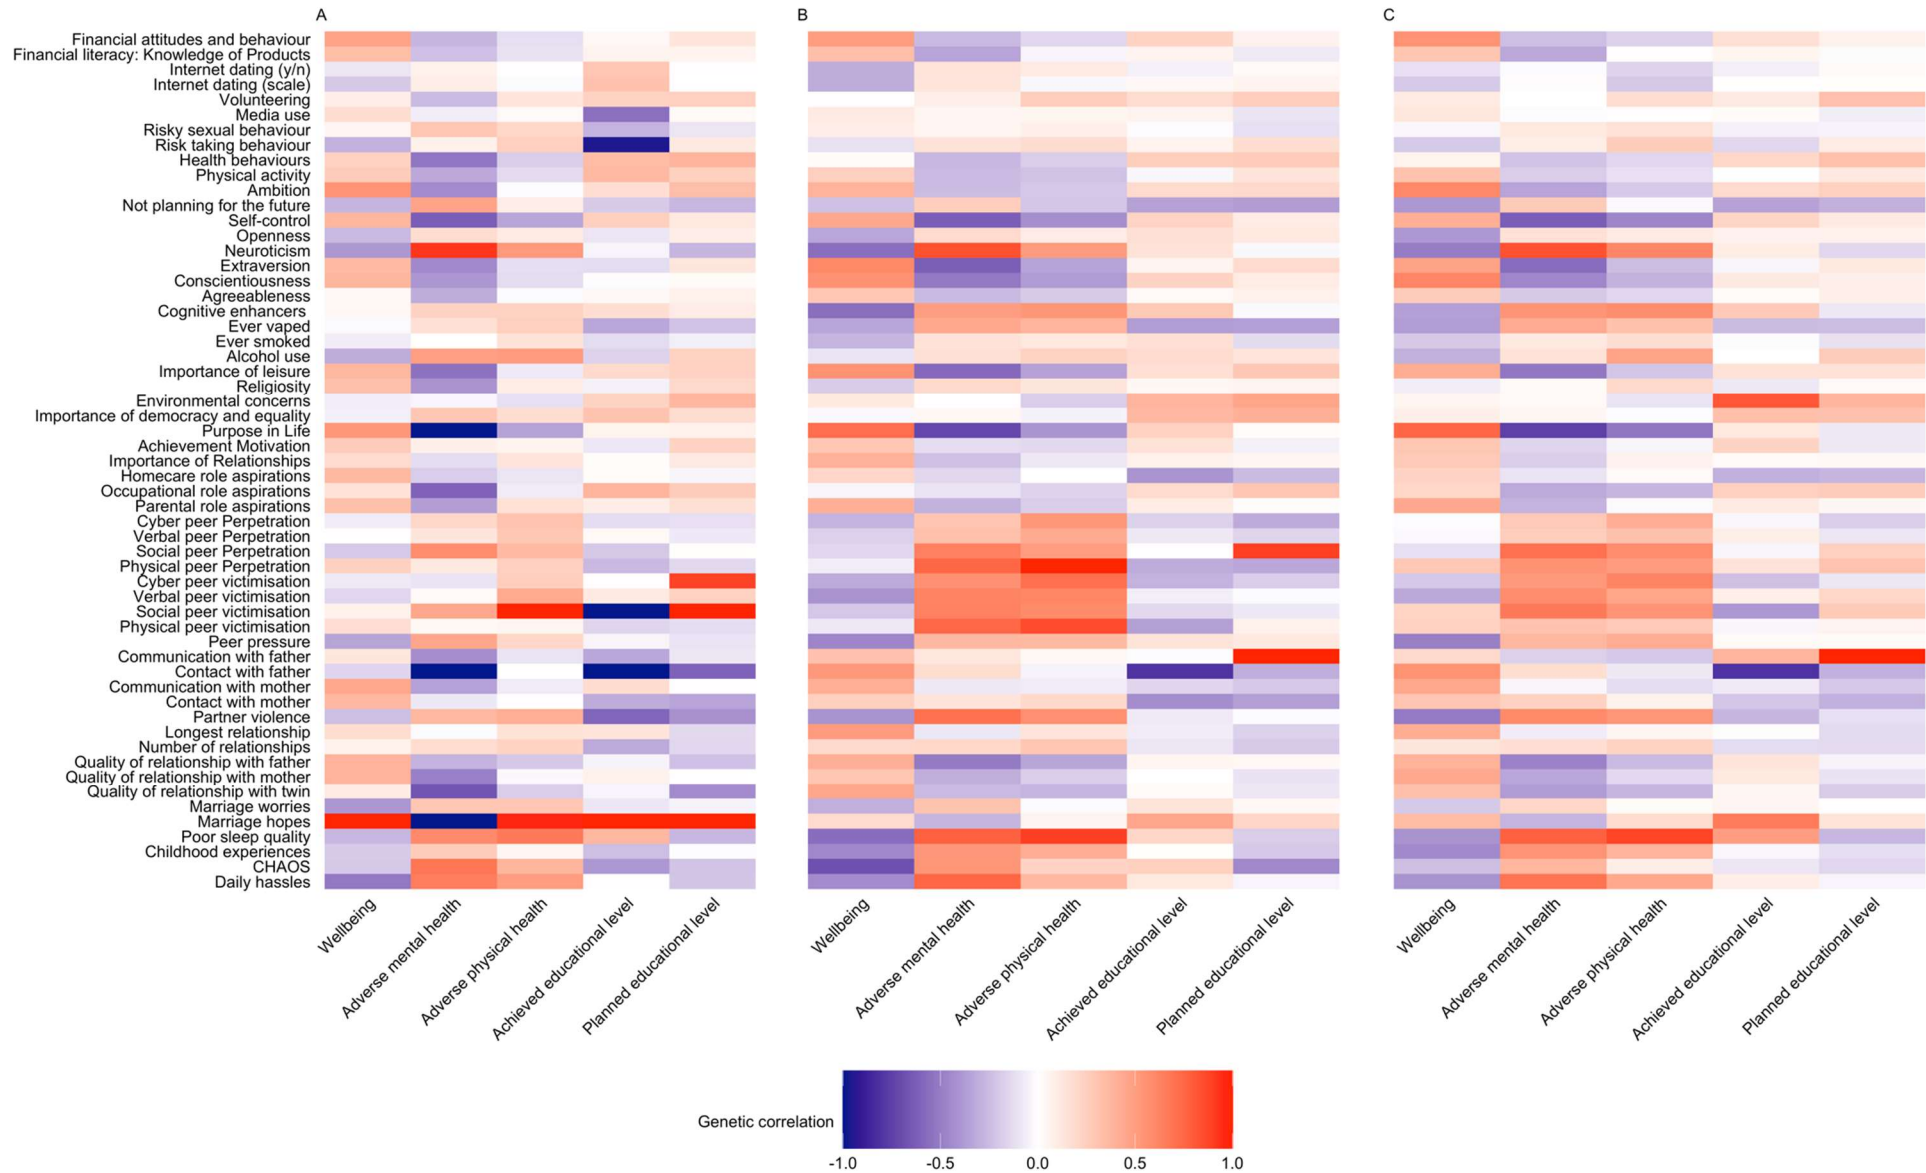



**Figure S6.** Shared environmental correlations between psychological and behavioural traits and key functional outcomes (a) for the whole sample; (b) MZ and DZ same sex; (c) males only; (d) females only.

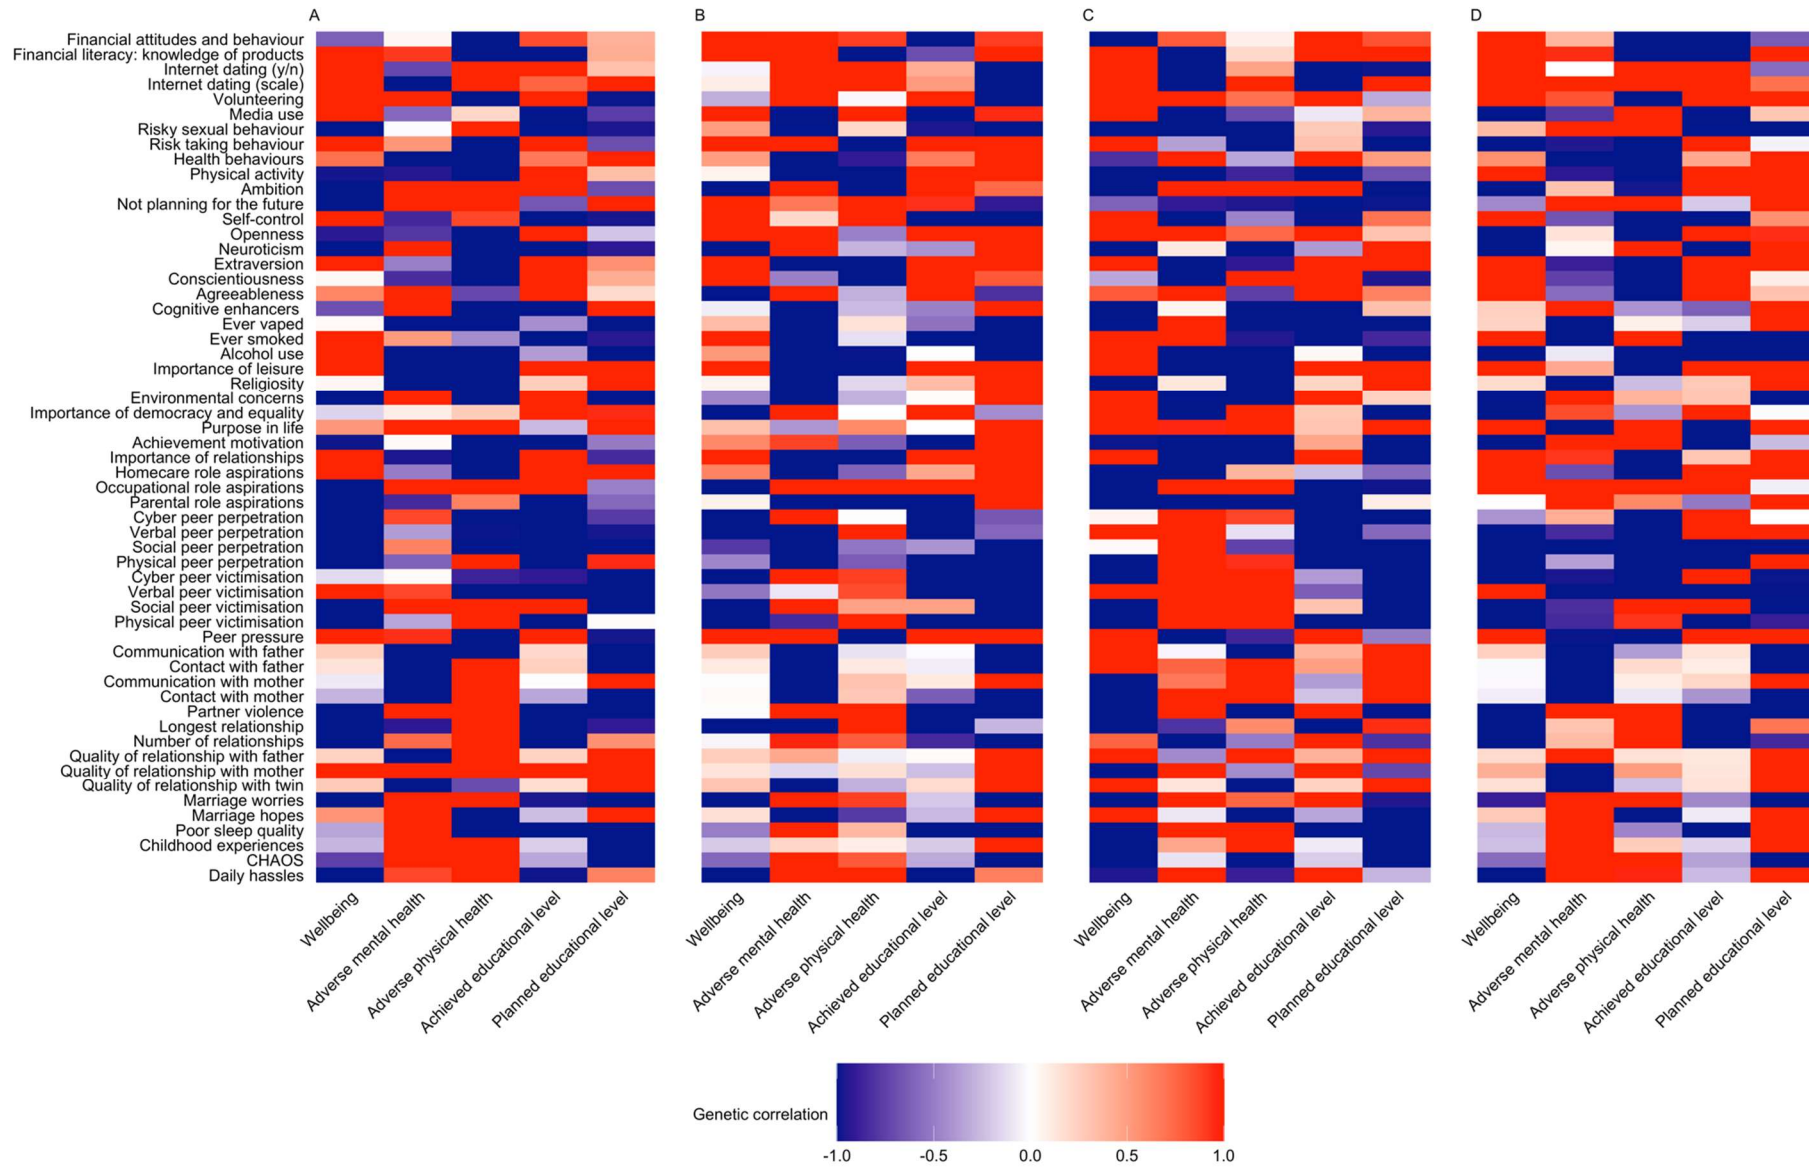

**Figure S7.** Non-shared environmental correlations between psychological and behavioural traits and key functional outcomes (a) for the whole sample; (b) MZ and DZ same sex twin pairs only; (c) males only; (d) females only

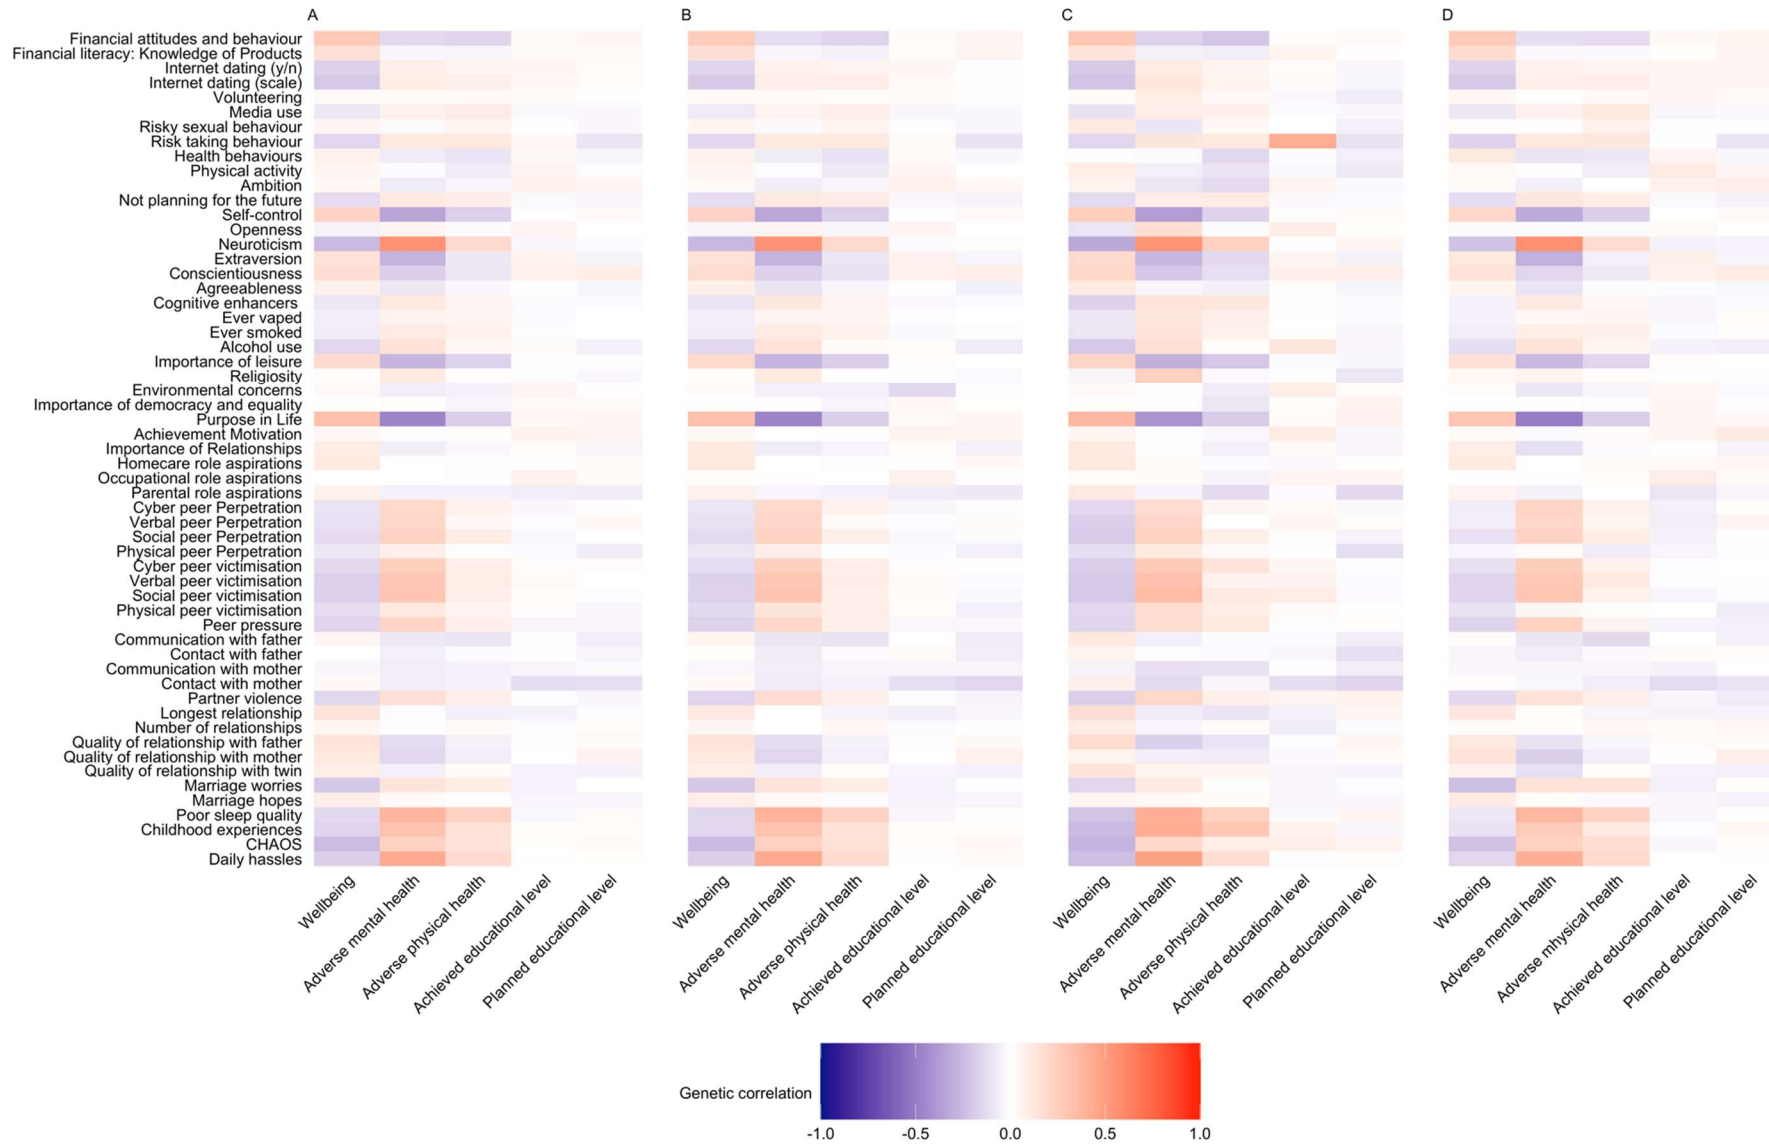

**Figure S8.** Univariate GREML analyses; SNP heritabilities for psychological traits and functional outcomes for the whole sample (standard errors represented in error bars; reml-no-constrain option indicated by the point estimates below 0).

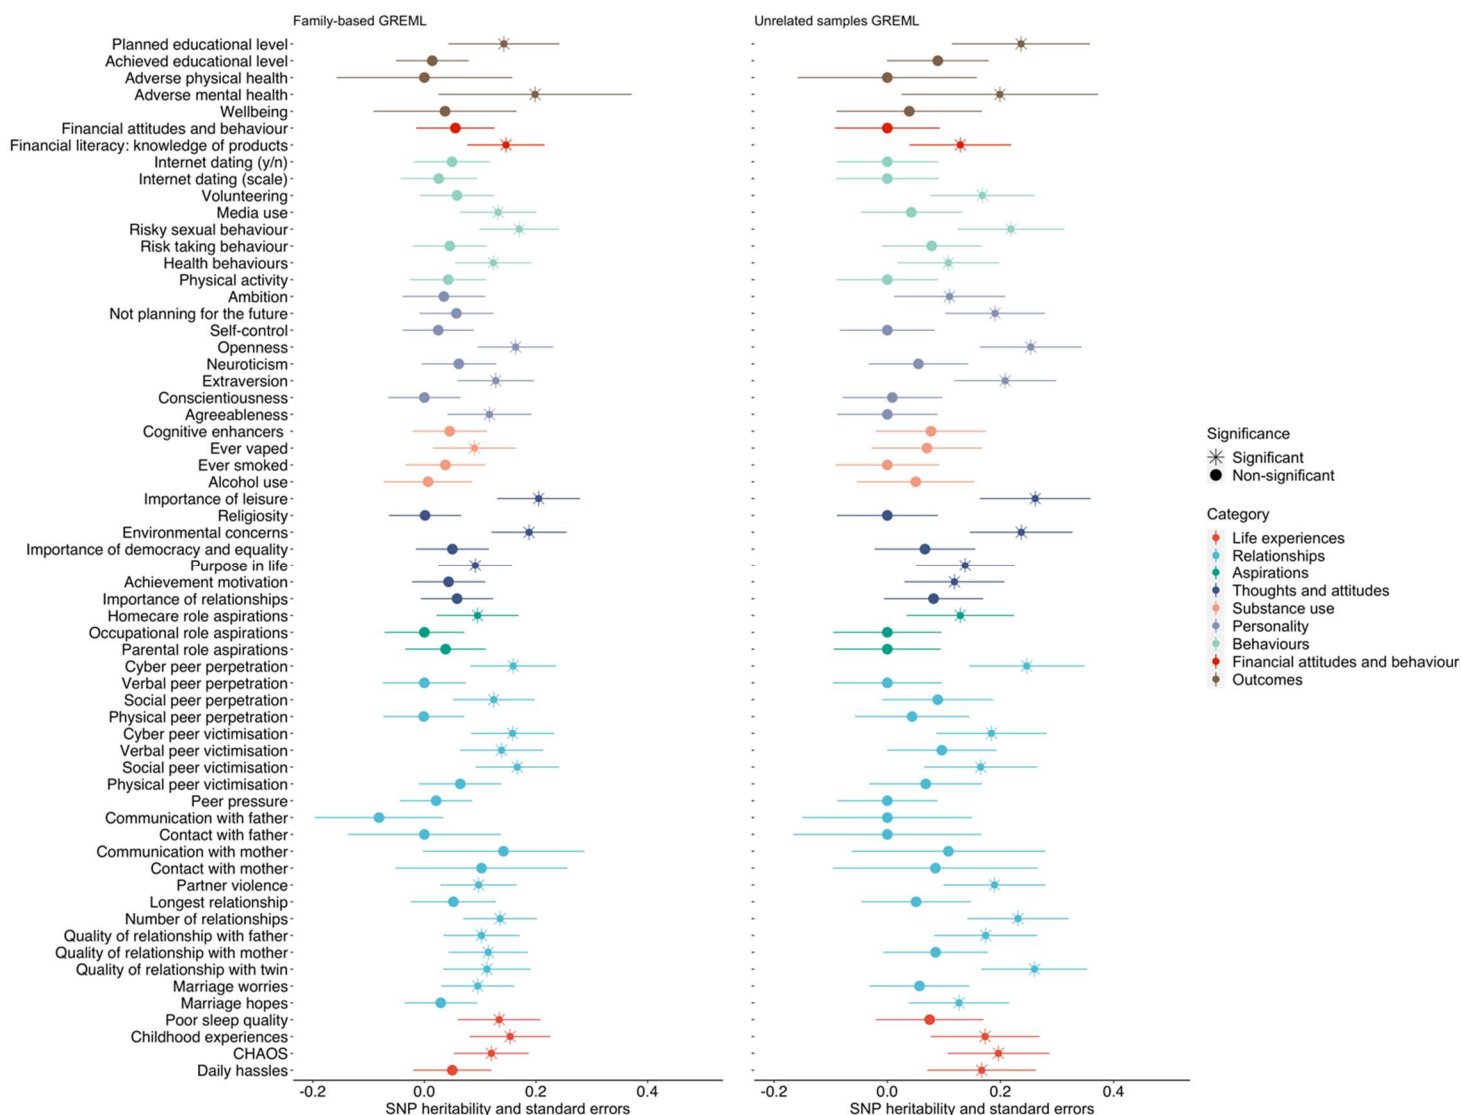



**Figure S9.** Univariate twin analyses of additive genetic (A), shared environmental (C), and non-shared environmental (E) components of variance for variables for psychological traits and functional outcomes for the whole sample for untransformed data and when using Van der Waerden transformation

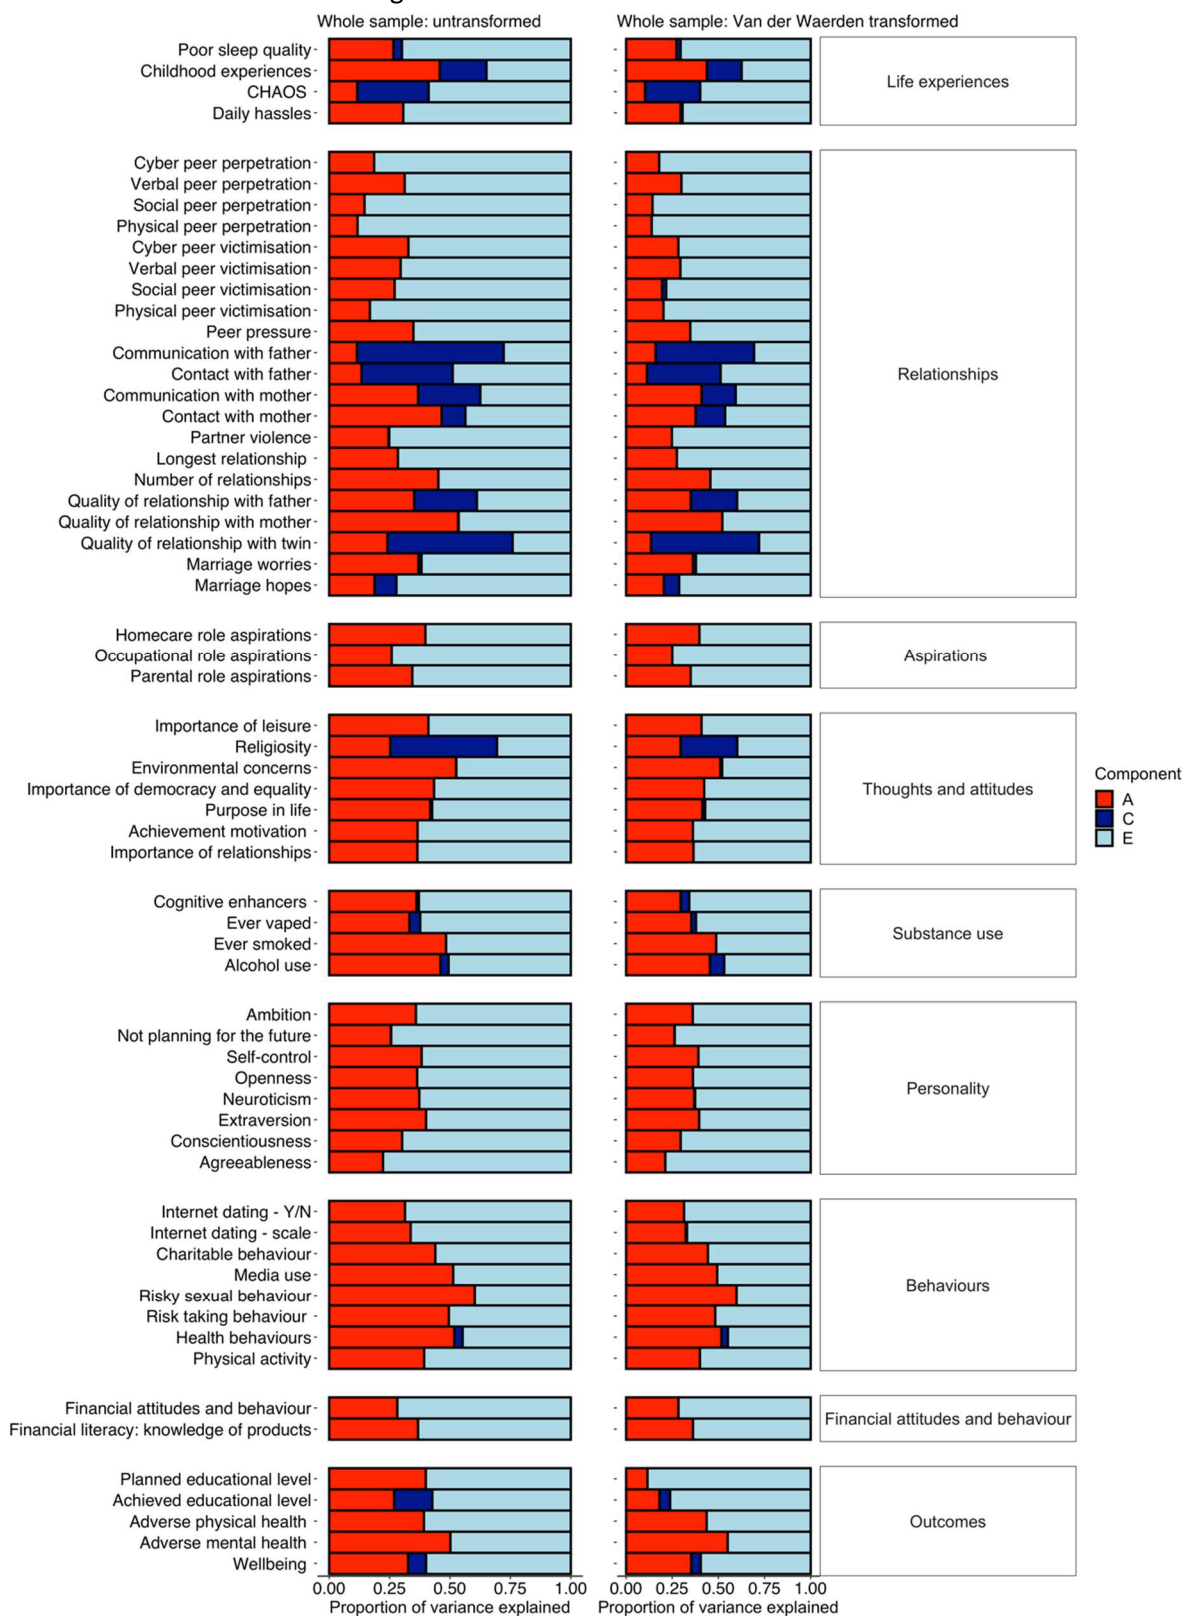

**Figure S10.** Univariate GREML analyses; SNP heritabilities for psychological traits and functional outcomes for the whole sample for untransformed data and when using Van der Waerden transformation (standard errors represented in error bars).

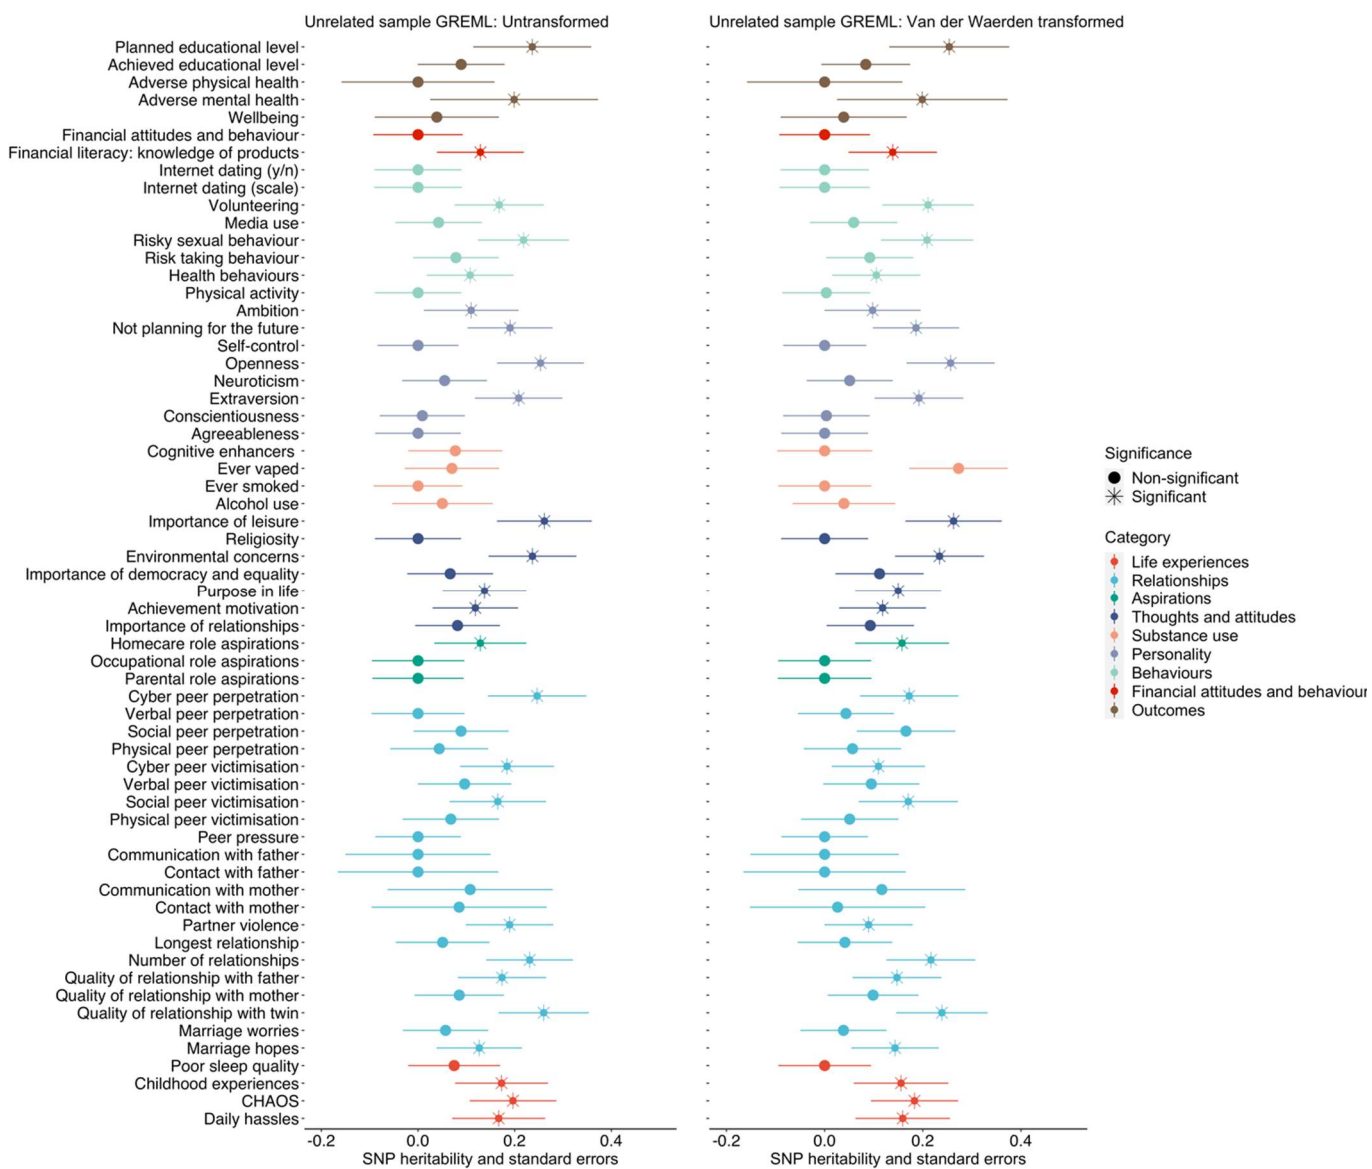

Supplement: JCV2-1-e12053-s001.pdf [file JCV2-1-e12053-s001.pdf]
